# Supplementary material for: Palladium-catalyzed stereoselective construction of chiral allenes bearing nonadjacent axial and two central chirality
Source: Royal Society of Chemistry journal article supplement (doi:10.1039/d3ob01315d), 2023-01-01

## Supporting Information

### **Palladium-Catalyzed Stereoselective Construction of Chiral Allenes Bearing Nonadjacent Axial and Two Central Chirality**

*Li-Xia Liu, Wen-Jun Huang, Chang-Bin Yu,\* and Yong-Gui Zhou\**

*State Key Laboratory of Catalysis, Dalian Institute of Chemical Physics, Chinese Academy of Sciences, Dalian 116023, P. R. China;*

*University of Chinese Academy of Sciences, Beijing 100049, P. R. China*

*Email: cbyu@dicp.ac.cn; ygzhou@dicp.ac.cn*

#### **Table of Contents**

|                                                                           |                |
|---------------------------------------------------------------------------|----------------|
| <b>1. General and Materials.....</b>                                      | <b>S1</b>      |
| <b>2. Synthesis of Substrates.....</b>                                    | <b>S1-3</b>    |
| <b>3. Pd-Catalyzed Asymmetric Allenylic Alkylation of Flavonoids.....</b> | <b>S4-13</b>   |
| <b>4. Experiment at Gram Scale.....</b>                                   | <b>S14</b>     |
| <b>5. Product Elaborations.....</b>                                       | <b>S15-16</b>  |
| <b>6. Determination of Absolute Configuration.....</b>                    | <b>S17-18</b>  |
| <b>7. References.....</b>                                                 | <b>S19</b>     |
| <b>8. Copy of NMR and HPLC Spectra.....</b>                               | <b>S20-125</b> |

## 1. General and Materials

**General:** All reactions were carried out under an atmosphere of nitrogen using the standard Schlenk techniques, unless otherwise noted. Solvents were treated prior to use according to the standard methods.  $^1\text{H}$  NMR,  $^{13}\text{C}$  NMR and  $^{19}\text{F}$  NMR spectra were recorded at room temperature in  $\text{CDCl}_3$  on 400 MHz instrument with TMS as internal standard. Enantiomeric excess was determined by HPLC analysis, using chiral column described below in detail. Optical rotations were measured by polarimeter. Flash column chromatography was performed on silica gel (200-300 mesh). The heat source for all heating reactions is the oil bath. High-resolution mass spectrometry (HRMS) was measured on an electrospray ionization (ESI) apparatus using the time-of-flight (TOF) mass spectrometry. All reactions were monitored by TLC analysis.

**Materials:** Commercially available reagents and solvents were used throughout without further purification.

## 2. Synthesis of Substrates

### 2.1. The Synthesis of Flavonoids

The flavonoids **1** were synthesized from (substituted) 2'-hydroxyacetophenones and carbonate esters through two steps according to the known procedure, in which **1a-h** and **1m-s** are the known compounds.<sup>1-4</sup> First, the methoxycarbonyl group was introduced to the known 2'-hydroxyacetophenone **S1** under the basic condition to afford the intermediate  $\beta$ -keto ester. Then,  $\beta$ -keto ester underwent the base-catalyzed domino aldol-oxa-Michael reactions with aldehydes to provide the desired flavonoids **1**.

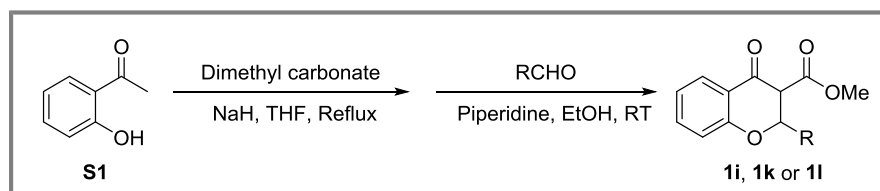

**General procedure:** To a solution of ketone (40 mmol) in THF (80 mL) was slowly added sodium hydride (4.800 g, 120 mmol, 60%) at the ambient temperature. Subsequently, the dimethyl carbonate (6.8 mL, 80 mmol) was added dropwise to the suspension. The reaction mixture was stirred at ambient temperature for about 5 minutes and then heated up to reflux for about 2 hours. The reaction was complete as monitored by TLC. After cooling to room temperature, the resulting mixture was acidified with aqueous HCl (3.0 M) to pH 4-5. After separation, the aqueous layer was extracted with ethyl acetate (50 mL $\times$ 3). The combined organic layer was dried over anhydrous sodium sulfate, filtered and concentrated under the reduced pressure. The combined organic layer was dried over sodium sulfate and evaporated under the reduced pressure. The crude residue was purified by flash chromatography on silica gel using hexanes/ethyl acetate (20/1-10/1) as eluent to give the intermediate ester.

The ester intermediate (4.0 mmol) thus obtained was dissolved in ethanol (12 mL) followed by addition of aldehydes (4.0 mmol, 1.0 equiv.). After that, the piperidine (0.8 mmol, 0.2 equiv.) was added to the above ethanol solution. The resulting mixture was stirred at ambient temperature for about 12 h. After the completion of the reaction, the volatiles were removed under the reduced pressure. The residue was purified by flash chromatography on silica gel using hexanes/ethyl acetate (50/1) as eluent to give the flavonoids **1**.

---

**Methyl 2-Benzyl-4-hydroxy-2H-chromene-3-carboxylate (1i):**

0.758 g, 64% yield (last step), white solid, mp 92-93 °C, new compound,  $R_f = 0.48$  (hexanes/ethyl acetate 20/1).  $^1\text{H NMR}$  (400 MHz,  $\text{CDCl}_3$ )  $\delta$  12.07 (brs, 1H), 7.69 (dd,  $J = 7.7, 1.6$  Hz, 1H), 7.39-7.34 (m, 1H), 7.31-7.26 (m, 2H), 7.24-7.19 (m, 1H), 7.18-7.12 (m, 2H), 7.01 (t,  $J = 7.5$  Hz, 1H), 6.87 (d,  $J = 8.2$  Hz, 1H), 5.36 (dd,  $J = 8.8, 4.4$  Hz, 1H), 3.71 (s, 3H), 3.04 (dd,  $J = 13.8, 8.9$  Hz, 1H), 2.82 (dd,  $J = 13.8, 4.4$  Hz, 1H).  $^{13}\text{C NMR}$  (100 MHz,  $\text{CDCl}_3$ )  $\delta$  170.5, 162.4, 155.6, 137.5, 133.5, 129.6, 128.3, 126.6, 124.7, 121.4, 117.9, 117.6, 95.6, 75.1, 51.8, 41.3. HRMS Calculated for  $\text{C}_{18}\text{H}_{16}\text{NaO}_4$   $[\text{M}+\text{Na}]^+$  319.0941, found: 319.0943.

---

**Methyl 4-Oxo-2-(*o*-tolyl)chromane-3-carboxylate (1k):**

0.730 g, 62% yield (last step), white solid, mp 121-122 °C, new compound,  $R_f = 0.40$  (hexanes/ethyl acetate 20/1).  $^1\text{H NMR}$  (400 MHz,  $\text{CDCl}_3$ )  $\delta$  7.97 (dd,  $J = 7.9, 1.6$  Hz, 1H), 7.56-7.47 (m, 2H), 7.32-7.25 (m, 3H), 7.09 (t,  $J = 7.5$  Hz, 1H), 7.01 (d,  $J = 8.4$  Hz, 1H), 5.96 (d,  $J = 12.6$  Hz, 1H), 4.29 (d,  $J = 12.6$  Hz, 1H), 3.63 (s, 3H), 2.48 (s, 3H).  $^{13}\text{C NMR}$  (100 MHz,  $\text{CDCl}_3$ )  $\delta$  188.2, 167.6, 161.3, 137.1, 136.8, 134.2, 131.2, 129.5, 127.6, 126.8, 126.5, 122.0, 119.9, 118.1, 77.5, 58.3, 52.5, 19.4. HRMS Calculated for  $\text{C}_{18}\text{H}_{16}\text{KO}_4$   $[\text{M}+\text{K}]^+$  335.0680, found: 335.0683.

---

**Methyl 4-Hydroxy-2-(*m*-tolyl)-2H-chromene-3-carboxylate (1l):**

0.708 g, 60% yield (last step), white solid, mp 90-91 °C, new compound,  $R_f = 0.40$  (hexanes/ethyl acetate 20/1).  $^1\text{H NMR}$  (400 MHz,  $\text{CDCl}_3$ )  $\delta$  12.29 (brs, 1H), 7.68 (dd,  $J = 7.7, 1.5$  Hz, 1H), 7.28-7.26 (m, 1H), 7.19-7.13 (m, 3H), 7.10-7.04 (m, 1H), 6.95 (t,  $J = 7.5$  Hz, 1H), 6.79 (d,  $J = 8.2$  Hz, 1H), 6.22 (s, 1H), 3.76 (s, 3H), 2.30 (s, 3H).  $^{13}\text{C NMR}$  (100 MHz,  $\text{CDCl}_3$ )  $\delta$  170.7, 163.1, 155.8, 140.0, 138.0, 133.4, 129.3, 128.3, 128.0, 124.5, 124.3, 121.3, 117.8, 117.3, 94.1, 74.7, 51.9, 21.5. HRMS Calculated for  $\text{C}_{18}\text{H}_{17}\text{O}_4$   $[\text{M}+\text{H}]^+$  297.1121, found: 297.1119.

---

**2.2. The Synthesis of Allenylic Carbonates**

The allenylic carbonates **2** could be conveniently synthesized from the commercially available propargyl alcohol and aldehydes through two steps according to the known procedure, all of which are the known compounds except for the **2c**.<sup>5</sup> First, the propargyl alcohol underwent the copper-catalyzed reaction with cyclohexanecarbaldehyde to provide the intermediate allenylic alcohol. Then, the allenylic carbonate **2c** could be prepared from the above allenylic alcohol intermediate and ethyl chloroformate under the basic condition.

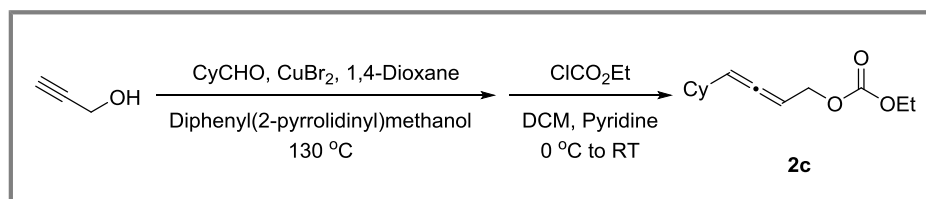

**Procedure:** To a dried Schlenk flask were sequentially added copper dibromide (0.894 g, 4.0

mmol), diphenyl(2-pyrrolidiny)methanol (5.067 g, 20 mmol), 1,4-dioxane (40 mL), cyclohexane carbaldehyde (3.365 g, 30 mmol), and propargyl alcohol (1.682 g, 30 mmol) under the nitrogen atmosphere. The mixture was stirred in an oil bath preheated at 130 °C for 12 h. After cooling to room temperature, the resulting mixture was diluted with diethyl ether (60 mL), which was washed with an aqueous solution of hydrochloric acid (HCl, 3.0 M, 60 mL). After separation, the aqueous layer was extracted with diethyl ether (60 mL×3). The combined organic layer was dried over anhydrous sodium sulfate, filtered and concentrated under the reduced pressure. The residue was purified by flash chromatography on silica gel using hexanes/ethyl acetate (20/1-10/1) as eluent to afford the intermediate allenylic alcohol.

A solution of the above allenylic alcohol (1.046 g, 6.9 mmol) and pyridine (1.67 mL, 20.7 mmol) in dichloromethane (18 mL) was cooled to 0 °C. The ethyl chloroformate (1.31 mL, 13.8 mmol) was added dropwise over a period of 5 minutes. The reaction mixture was allowed to warm to room temperature. When the reaction was completed as monitored by TLC, the reaction mixture was acidified with the hydrogen chloride aqueous solution (HCl, 3.0 M) to pH 5-6 and extracted three times with dichloromethane. The combined organic layer was dried over anhydrous sodium sulfate, filtered and concentrated under the reduced pressure. The residue was purified by flash chromatography on silica gel using hexanes/ethyl acetate (50/1) as eluent to give the desirable allenylic carbonate **2c**.

---

#### **4-Cyclohexylbuta-2,3-dien-1-yl Ethyl Carbonate (2c):**

1.292 g, 29% yield (two steps), yellow liquid, new compound,  $R_f = 0.66$  (hexanes/ethyl acetate 20/1).  $^1\text{H NMR}$  (400 MHz,  $\text{CDCl}_3$ )  $\delta$  5.40-5.21 (m, 2H), 4.64-4.55 (m, 2H), 4.20 (q,  $J = 7.1$  Hz, 2H), 2.07-1.94 (m, 1H), 1.80-1.67 (m, 4H), 1.67-1.58 (m, 1H), 1.31 (t,  $J = 7.1$  Hz, 3H), 1.29-1.01 (m, 5H).  $^{13}\text{C NMR}$  (100 MHz,  $\text{CDCl}_3$ )  $\delta$  204.8, 155.2, 99.2, 87.5, 66.4, 64.1, 36.9, 33.0, 26.2, 26.1, 14.4. HRMS Calculated for  $\text{C}_{13}\text{H}_{21}\text{O}_3$   $[\text{M}+\text{H}]^+$  225.1485, found: 225.1484.

---

### 3. Pd-Catalyzed Asymmetric Allenylic Alkylation of Flavonoids

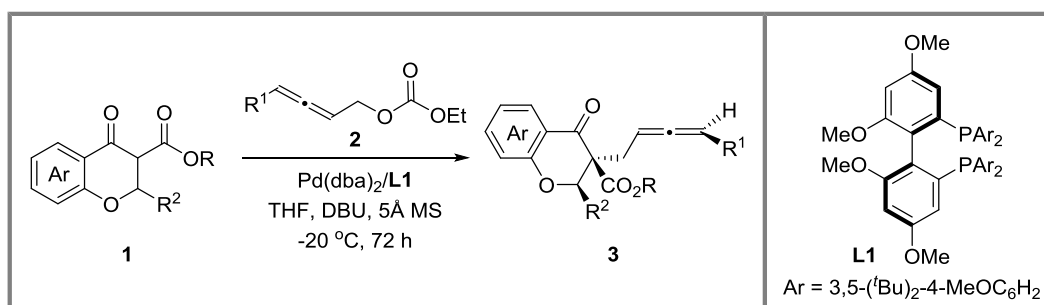

The metal precursor Pd(dba)<sub>2</sub> (0.02 mmol, 11.5 mg, 10 mol%), ligand (*R*)-DTBM-GARPHOS (**L1**) (0.022 mmol, 26.7 mg, 11 mol%) and tetrahydrofuran (1.5 mL) were placed in a dried Schlenk tube under nitrogen atmosphere. The mixture was stirred at 30 °C for 30 min. Then the mixture was cooled to -20 °C. Thereafter, the flavonoids **1** (0.20 mmol), 5Å MS (50.0 mg) and 1,8-diazabicyclo[5,4,0]undec-7-ene (DBU) (35.9 μL, 0.24 mmol) were added, and the reaction mixture was stirred at -20 °C for 10 min. Sequentially, allenylic carbonates **2** (0.30 mmol) and tetrahydrofuran (0.5 mL) were added slowly. The mixture was stirred at -20 °C for 72 h. After the completion of the reaction, without any treatment, the residue was quickly purified by column chromatography on silica gel (hexanes/ethyl acetate/dichloromethane 100/1/2-100/3/6) to give the desirable chiral products **3**.

The racemates were prepared by running reactions with an achiral DPPP ligand at 30 °C. And two diastereoisomers were inseparable.

#### (-)-Ethyl 4-Oxo-2-phenyl-3-(4-phenylbuta-2,3-dien-1-yl)chromane-3-carboxylate (**3aa**):

78.5 mg, 92% yield, pale yellow oil, new compound, R<sub>f</sub> = 0.35 (hexanes/ethyl acetate 20/1), 16:1 dr, 99% ee (major diastereoisomer), [α]<sub>D</sub><sup>20</sup> = -228.66 (*c* 0.98, CHCl<sub>3</sub>). The major diastereoisomer:

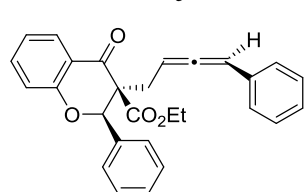

<sup>1</sup>H NMR (400 MHz, CDCl<sub>3</sub>) δ 8.00 (dd, *J* = 7.9, 1.5 Hz, 1H), 7.55-7.43 (m, 3H), 7.42-7.35 (m, 3H), 7.28-7.15 (m, 5H), 7.13-7.06 (m, 1H), 7.04-6.99 (m, 1H), 6.24-6.17 (m, 1H), 5.71 (s, 1H), 5.62-5.48 (m, 1H), 4.11-3.95 (m, 2H), 3.34-3.24 (m, 1H), 2.57-2.40 (m, 1H), 1.03 (t, *J* = 7.1 Hz, 3H). <sup>13</sup>C NMR (100 MHz, CDCl<sub>3</sub>) δ 207.6, 190.0, 168.3, 161.6, 136.3, 135.6, 133.9, 129.2, 128.7, 128.4, 127.9, 127.4, 127.2, 126.9, 122.0, 121.2, 118.1, 95.8, 89.9, 82.5, 61.7, 61.3, 29.5, 13.8. HPLC: Chiralpak AD-3 column, 254 nm, 30 °C, *n*-Hexane/*i*-PrOH = 98/2, flow = 0.8 mL/min, retention time 17.1 min (major) and 18.0 min. HRMS Calculated for C<sub>28</sub>H<sub>25</sub>O<sub>4</sub> [M+H]<sup>+</sup> 425.1747, found: 425.1748.

#### (-)-Methyl 4-Oxo-2-phenyl-3-(4-phenylbuta-2,3-dien-1-yl)chromane-3-carboxylate (**3ba**):

77.7 mg, 95% yield, colorless oil, new compound, R<sub>f</sub> = 0.28 (hexanes/ethyl acetate 20/1), 19:1 dr, 98% ee (major diastereoisomer), [α]<sub>D</sub><sup>20</sup> = -273.28 (*c* 1.03, CHCl<sub>3</sub>).

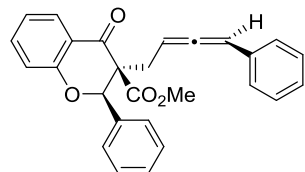

The major diastereoisomer: <sup>1</sup>H NMR (400 MHz, CDCl<sub>3</sub>) δ 8.00 (d, *J* = 7.7 Hz, 1H), 7.55-7.49 (m, 1H), 7.47-7.32 (m, 5H), 7.28-7.15 (m, 5H), 7.10 (t, *J* = 7.5 Hz, 1H), 7.01 (d, *J* = 8.3 Hz, 1H), 6.29-6.09 (m, 1H), 5.72 (s, 1H), 5.64-5.46 (m, 1H), 3.58 (s, 3H), 3.35-3.18 (m, 1H), 2.58-2.37 (m, 1H). <sup>13</sup>C NMR (100 MHz, CDCl<sub>3</sub>) δ 207.6, 189.8, 168.9, 161.5, 136.3, 135.6, 133.8,

129.2, 128.7, 128.5, 127.9, 127.2, 126.9, 122.1, 121.2, 118.3, 95.9, 89.8, 82.5, 61.4, 52.6, 29.7. HPLC: Chiralpak AD-3 column, 254 nm, 30 °C, *n*-Hexane/*i*-PrOH = 97/3, flow = 0.8 mL/min, retention time 22.8 min (major) and 23.9 min. HRMS Calculated for C<sub>27</sub>H<sub>23</sub>O<sub>4</sub> [M+H]<sup>+</sup> 411.1591, found: 411.1589.

**(-)-Isopropyl 4-Oxo-2-phenyl-3-(4-phenylbuta-2,3-dien-1-yl)chromane-3-carboxylate (3ca):**

81.3 mg, 93% yield, colorless oil, new compound, R<sub>f</sub> = 0.45 (hexanes/ethyl acetate 20/1), 12:1 dr, 97% ee (major diastereoisomer), [α]<sub>D</sub><sup>20</sup> = -220.58 (*c* 1.01, CHCl<sub>3</sub>).

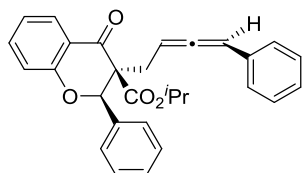

The major diastereoisomer: <sup>1</sup>H NMR (400 MHz, CDCl<sub>3</sub>) δ 8.00 (dd, *J* = 7.8, 0.9 Hz, 1H), 7.62-7.43 (m, 3H), 7.42-7.32 (m, 3H), 7.28-7.18 (m, 5H), 7.14-7.05 (m, 1H), 7.04-6.99 (m, 1H), 6.32-6.07 (m, 1H), 5.71 (s, 1H), 5.64-5.49 (m, 1H), 5.04-4.72 (m, 1H), 3.33-3.14 (m, 1H), 2.54-2.38 (m, 1H), 1.13 (d, *J* = 6.2 Hz, 3H), 0.94 (d, *J* = 6.2 Hz, 3H). <sup>13</sup>C NMR (100 MHz, CDCl<sub>3</sub>) δ 207.5, 190.1, 167.8, 161.6, 136.2, 135.6, 133.9, 129.1, 128.7, 128.3, 127.8, 127.5, 127.2, 126.9, 121.9, 121.2, 118.0, 95.7, 90.0, 82.5, 69.8, 61.1, 29.4, 21.6, 21.3. HPLC: Chiralcel OD-3 column, 254 nm, 30 °C, *n*-Hexane/*i*-PrOH = 97/3, flow = 0.8 mL/min, retention time 9.9 min and 12.3 min (major). HRMS Calculated for C<sub>29</sub>H<sub>27</sub>O<sub>4</sub> [M+H]<sup>+</sup> 439.1904, found: 439.1902.

**(-)-tert-Butyl 4-Oxo-2-phenyl-3-(4-phenylbuta-2,3-dien-1-yl)chromane-3-carboxylate (3da):**

87.2 mg, 96% yield, colorless oil, new compound, R<sub>f</sub> = 0.51 (hexanes/ethyl acetate 20/1), 12:1 dr, 95% ee (major diastereoisomer), [α]<sub>D</sub><sup>20</sup> = -201.54 (*c* 1.03, CHCl<sub>3</sub>).

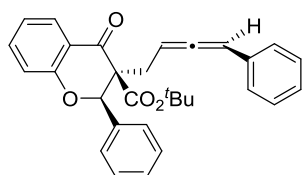

The major diastereoisomer: <sup>1</sup>H NMR (400 MHz, CDCl<sub>3</sub>) δ 8.00 (dd, *J* = 7.9, 1.4 Hz, 1H), 7.58-7.34 (m, 6H), 7.27-7.18 (m, 5H), 7.13-6.98 (m, 2H), 6.29-6.10 (m, 1H), 5.68 (s, 1H), 5.64-5.48 (m, 1H), 3.30-3.11 (m, 1H), 2.45-2.34 (m, 1H), 1.25 (s, 9H). <sup>13</sup>C NMR (100 MHz, CDCl<sub>3</sub>) δ 207.5, 190.3, 167.2, 161.5, 136.0, 135.6, 134.0, 129.1, 128.6, 128.2, 127.7, 127.6, 127.1, 126.9, 121.7, 121.3, 117.8, 95.6, 90.1, 83.0, 82.5, 61.6, 29.4, 27.7. HPLC: Chiralpak AD-3 column, 254 nm, 30 °C, *n*-Hexane/*i*-PrOH = 99/1, flow = 1.0 mL/min, retention time 16.7 min and 21.0 min (major). HRMS Calculated for C<sub>30</sub>H<sub>29</sub>O<sub>4</sub> [M+H]<sup>+</sup> 453.2060, found: 453.2053.

**(-)-Cyclohexyl 4-Oxo-2-phenyl-3-(4-phenylbuta-2,3-dien-1-yl)chromane-3-carboxylate (3ea):**

87.6 mg, 92% yield, colorless oil, new compound, R<sub>f</sub> = 0.41 (hexanes/ethyl acetate 20/1), 12:1 dr, 98% ee (major diastereoisomer), [α]<sub>D</sub><sup>20</sup> = -175.04 (*c* 1.03, CHCl<sub>3</sub>).

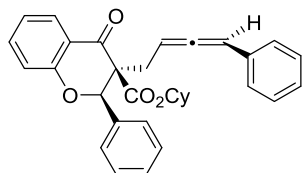

The major diastereoisomer: <sup>1</sup>H NMR (400 MHz, CDCl<sub>3</sub>) δ 8.01 (dd, *J* = 7.8, 1.2 Hz, 1H), 7.57-7.45 (m, 3H), 7.44-7.33 (m, 3H), 7.28-7.18 (m, 5H), 7.15-7.06 (m, 1H), 7.06-6.98 (m, 1H), 6.29-6.11 (m, 1H), 5.72 (s, 1H), 5.65-5.46 (m, 1H), 4.93-4.70 (m, 1H), 3.37-3.14 (m, 1H), 2.52-2.37 (m, 1H), 1.74-1.62 (m, 1H), 1.50-1.11 (m, 9H). <sup>13</sup>C NMR (100 MHz, CDCl<sub>3</sub>) δ 207.5, 190.0, 167.6, 161.6, 136.1, 135.5, 133.9, 129.1, 128.6, 128.4, 127.8, 127.5, 127.1, 126.9, 121.9, 121.4, 118.0, 95.6, 90.0, 82.5, 73.6, 61.2, 31.0, 30.6, 29.3, 25.2, 22.5, 22.3. HPLC: Chiralpak AD-3 column, 254 nm, 30 °C, *n*-Hexane/*i*-PrOH = 98/2, flow = 1.0 mL/min, retention time 21.1 min (major) and 23.1 min (minor). HRMS Calculated for C<sub>32</sub>H<sub>31</sub>O<sub>4</sub> [M+H]<sup>+</sup> 479.2217, found: 479.2214.

---

**(-)-Benzyl 4-Oxo-2-phenyl-3-(4-phenylbuta-2,3-dien-1-yl)chromane-3-carboxylate (3fa):**

91.8 mg, 94% yield, pale yellow oil, new compound,  $R_f = 0.34$  (hexanes/ethyl acetate 20/1), 16:1 dr, 99% ee (major diastereoisomer),  $[\alpha]_D^{20} = -203.64$  ( $c$  1.04,  $\text{CHCl}_3$ ). The major diastereoisomer:

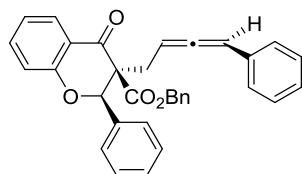

$^1\text{H NMR}$  (400 MHz,  $\text{CDCl}_3$ )  $\delta$  8.02 (dd,  $J = 7.9, 1.2$  Hz, 1H), 7.58-7.49 (m, 1H), 7.34-7.19 (m, 13H), 7.14-7.07 (m, 1H), 7.05-6.97 (m, 3H), 6.30-6.07 (m, 1H), 5.73 (s, 1H), 5.65-5.48 (m, 1H), 5.14 (d,  $J = 12.6$  Hz, 1H), 4.93 (d,  $J = 12.6$  Hz, 1H), 3.41-3.14 (m, 1H), 2.56-2.41 (m, 1H).  $^{13}\text{C NMR}$  (100 MHz,  $\text{CDCl}_3$ )  $\delta$  207.6, 189.7, 168.1, 161.6, 136.3, 135.4, 134.9, 133.8, 129.1, 128.7, 128.4, 128.2, 128.0, 127.8, 127.4, 127.2, 126.9, 122.1, 121.3, 118.2, 95.8, 89.8, 82.6, 67.2, 61.3, 29.4. HPLC: Chiralpak AD-3 column, 254 nm, 30 °C,  $n$ -Hexane/ $i$ -PrOH = 97/3, flow = 1.0 mL/min, retention time 27.0 min (major) and 31.8 min. HRMS Calculated for  $\text{C}_{33}\text{H}_{27}\text{O}_4$   $[\text{M}+\text{H}]^+$  487.1904, found: 487.1905.

---

**(-)-3-Nitro-2-phenyl-3-(4-phenylbuta-2,3-dien-1-yl)chroman-4-one (3ga):**

The reaction was conducted at -20 °C for 96 h. 58.8 mg, 74% yield, pale yellow oil, new compound,  $R_f = 0.37$  (hexanes/ethyl acetate 20/1), 4:1 dr, 94% ee (major diastereoisomer),  $[\alpha]_D^{20} =$

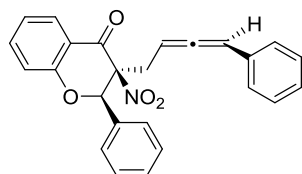

$-212.13$  ( $c$  0.98,  $\text{CHCl}_3$ ). The major diastereoisomer:  $^1\text{H NMR}$  (400 MHz,  $\text{CDCl}_3$ )  $\delta$  8.03 (dd,  $J = 7.9, 1.5$  Hz, 1H), 7.63-7.52 (m, 1H), 7.49-7.31 (m, 5H), 7.30-7.09 (m, 6H), 7.08-7.02 (m, 1H), 6.32-6.16 (m, 1H), 5.81 (s, 1H), 5.68-5.44 (m, 1H), 3.52-3.33 (m, 1H), 2.89-2.72 (m, 1H).  $^{13}\text{C NMR}$  (100 MHz,  $\text{CDCl}_3$ )  $\delta$  208.2, 183.0, 161.3, 137.3, 133.0, 133.0, 130.1, 128.9, 128.9, 128.4, 127.7, 127.2, 127.0, 123.1, 120.7, 118.7, 97.0, 92.9, 88.2, 82.0, 30.3. HPLC: Chiralpak AD-3 column, 254 nm, 30 °C,  $n$ -Hexane/ $i$ -PrOH = 98/2, flow = 0.8 mL/min, retention time 15.7 min and 16.8 min (major). The HRMS Calculated for  $\text{C}_{25}\text{H}_{19}\text{NNaO}_4$   $[\text{M}+\text{Na}]^+$  420.1206, found: 420.1211.

---

**(-)-Methyl 4-Oxo-3-(penta-2,3-dien-1-yl)-2-phenylchromane-3-carboxylate (3bb):**

33.1 mg, 47% yield, pale yellow oil, new compound,  $R_f = 0.42$  (hexanes/ethyl acetate 20/1), 5:1 dr, 95% ee (major diastereoisomer),  $[\alpha]_D^{20} = -189.18$  ( $c$  0.62,  $\text{CHCl}_3$ ). The major diastereoisomer:  $^1\text{H}$

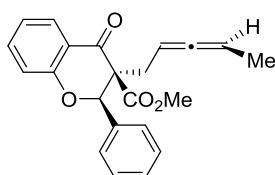

NMR (400 MHz,  $\text{CDCl}_3$ )  $\delta$  8.04-7.95 (m, 1H), 7.58-7.49 (m, 1H), 7.45-7.36 (m, 5H), 7.10 (t,  $J = 7.5$  Hz, 1H), 7.05 (d,  $J = 8.3$  Hz, 1H), 5.76 (s, 1H), 5.20-4.95 (m, 2H), 3.59 (s, 3H), 3.18-3.10 (m, 1H), 2.38-2.29 (m, 1H), 1.57 (dd,  $J = 7.0, 3.2$  Hz, 3H).  $^{13}\text{C NMR}$  (100 MHz,  $\text{CDCl}_3$ )  $\delta$  207.3, 189.9, 169.0, 161.5, 136.2, 135.7, 129.1, 128.3, 127.8, 127.2, 122.0, 121.3, 118.2, 87.0, 85.0, 82.3, 61.6, 52.5, 29.7, 14.1. HPLC: Chiralpak IB column, 254 nm, 30 °C,  $n$ -Hexane/ $i$ -PrOH = 99/1, flow = 1.0 mL/min, retention time 8.8 min and 15.9 min (major). HRMS Calculated for  $\text{C}_{22}\text{H}_{21}\text{O}_4$   $[\text{M}+\text{H}]^+$  349.1434, found: 349.1433.

---

**(-)-Methyl 3-(4-Cyclohexylbuta-2,3-dien-1-yl)-4-oxo-2-phenylchromane-3-carboxylate (3bc):**

19.1 mg, 23% yield, pale yellow oil, new compound,  $R_f = 0.46$  (hexanes/ethyl acetate 20/1), 10:1 dr, 87% ee (major diastereoisomer),  $[\alpha]_D^{20} = -137.94$  ( $c$  0.78,  $\text{CHCl}_3$ ). The major diastereoisomer:  $^1\text{H NMR}$  (400 MHz,  $\text{CDCl}_3$ )  $\delta$  7.99 (dd,  $J = 7.9, 1.4$  Hz, 1H), 7.57-7.51 (m, 1H), 7.48-7.43 (m,

2H), 7.42-7.37 (m, 3H), 7.13-7.04 (m, 2H), 5.77 (s, 1H), 5.24-5.13 (m, 1H), 5.12-5.02 (m, 1H), 3.59 (s, 3H), 3.20-3.08 (m, 1H), 2.37-2.28 (m, 1H), 2.03-1.88 (m, 1H), 1.79-1.56 (m, 5H), 1.35-1.03 (m, 5H). <sup>13</sup>C NMR (100 MHz, CDCl<sub>3</sub>) δ 205.4, 189.8, 169.1, 161.6, 136.2, 135.7, 129.1, 128.3, 127.9, 127.3, 122.0, 121.3, 118.2, 98.1, 86.3, 82.3, 61.5, 52.4, 37.1, 33.0, 32.7, 30.0, 26.1, 26.0, 25.9. HPLC: Chiralpak AD-3 column, 254 nm, 30 °C, *n*-Hexane/*i*-PrOH = 97/3, flow = 0.8 mL/min, retention time 11.3 min (minor) and 13.0 min (major). The HRMS Calculated for C<sub>27</sub>H<sub>29</sub>O<sub>4</sub> [M+H]<sup>+</sup> 417.2060, found: 417.2068.

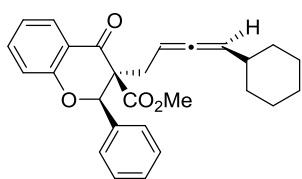

**(-)-Methyl 4-Oxo-2-phenyl-3-(4-(*o*-tolyl)buta-2,3-dien-1-yl)chromane-3-carboxylate (3bd):**

75.7 mg, 89% yield, colorless oil, new compound, R<sub>f</sub> = 0.28 (hexanes/ethyl acetate 20/1), 16:1 dr, 97% ee (major diastereoisomer), [α]<sub>D</sub><sup>20</sup> = -208.12 (*c* 1.02, CHCl<sub>3</sub>). The major diastereoisomer: <sup>1</sup>H NMR (400 MHz, CDCl<sub>3</sub>) δ 8.00 (dd, *J* = 7.9, 1.5 Hz, 1H), 7.56-7.49 (m, 1H), 7.48-7.41 (m, 2H), 7.42-7.33 (m, 3H), 7.32-7.28 (m, 1H), 7.17-7.05 (m, 4H), 7.04-6.99 (m, 1H), 6.50-6.26 (m, 1H), 5.73 (s, 1H), 5.59-5.45 (m, 1H), 3.58 (s, 3H), 3.34-3.15 (m, 1H), 2.54-2.42 (m, 1H), 2.25 (s, 3H). <sup>13</sup>C NMR (100 MHz, CDCl<sub>3</sub>) δ 208.2, 189.8, 168.9, 161.5, 136.3, 135.6, 135.1, 132.0, 130.5, 129.2, 128.4, 127.9, 127.4, 127.3, 127.2, 126.2, 122.1, 121.2, 118.2, 93.2, 88.8, 82.5, 61.4, 52.6, 29.7, 19.8. HPLC: Chiralcel OD-3 column, 254 nm, 30 °C, *n*-Hexane/*i*-PrOH = 97/3, flow = 0.8 mL/min, retention time 14.4 min and 29.7 min (major). HRMS Calculated for C<sub>28</sub>H<sub>25</sub>O<sub>4</sub> [M+H]<sup>+</sup> 425.1747, found: 425.1750.

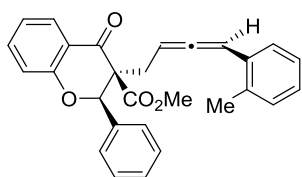

**(-)-Methyl 4-Oxo-2-phenyl-3-(4-(*m*-tolyl)buta-2,3-dien-1-yl)chromane-3-carboxylate (3be):**

76.9 mg, 91% yield, colorless oil, new compound, R<sub>f</sub> = 0.28 (hexanes/ethyl acetate 20/1), 24:1 dr, 99% ee (major diastereoisomer), [α]<sub>D</sub><sup>20</sup> = -224.23 (*c* 0.99, CHCl<sub>3</sub>). The major diastereoisomer: <sup>1</sup>H NMR (400 MHz, CDCl<sub>3</sub>) δ 8.00 (dd, *J* = 7.9, 1.5 Hz, 1H), 7.55-7.49 (m, 1H), 7.48-7.35 (m, 5H), 7.17-7.07 (m, 2H), 7.05-6.93 (m, 4H), 6.22-6.10 (m, 1H), 5.72 (s, 1H), 5.61-5.47 (m, 1H), 3.58 (s, 3H), 3.33-3.24 (m, 1H), 2.51-2.42 (m, 1H), 2.29 (s, 3H). <sup>13</sup>C NMR (100 MHz, CDCl<sub>3</sub>) δ 207.6, 189.8, 168.9, 161.5, 138.2, 136.3, 135.6, 133.7, 129.2, 128.5, 128.4, 128.0, 127.9, 127.5, 127.2, 124.0, 122.1, 121.2, 118.2, 95.9, 89.6, 82.5, 61.4, 52.6, 29.7, 21.4. HPLC: Chiralcel OD-3 column, 254 nm, 30 °C, *n*-Hexane/*i*-PrOH = 97/3, flow = 0.8 mL/min, retention time 13.9 min (minor) and 21.4 min (major). HRMS Calculated for C<sub>28</sub>H<sub>28</sub>NO<sub>4</sub> [M+NH<sub>4</sub>]<sup>+</sup> 442.2013, found: 442.2012.

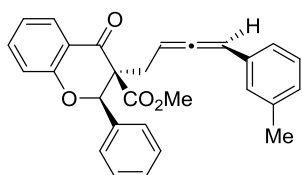

**(-)-Methyl 4-Oxo-2-phenyl-3-(4-(*p*-tolyl)buta-2,3-dien-1-yl)chromane-3-carboxylate (3bf):**

80.3 mg, 95% yield, colorless oil, new compound, R<sub>f</sub> = 0.29 (hexanes/ethyl acetate 20/1), 19:1 dr, 99% ee (the major diastereoisomer), [α]<sub>D</sub><sup>20</sup> = -243.55 (*c* 1.15, CHCl<sub>3</sub>). The major diastereoisomer: <sup>1</sup>H NMR (400 MHz, CDCl<sub>3</sub>) δ 8.00 (dd, *J* = 7.9, 1.5 Hz, 1H), 7.55-7.49 (m, 1H), 7.46-7.35 (m, 5H), 7.14-6.99 (m, 6H), 6.29-6.10 (m, 1H), 5.72 (s, 1H), 5.60-5.46 (m, 1H), 3.58 (s, 3H), 3.33-3.23 (m, 1H), 2.51-2.43 (m, 1H), 2.30 (s, 3H). <sup>13</sup>C NMR (100 MHz, CDCl<sub>3</sub>) δ 207.4, 189.8, 168.9, 161.5, 137.0, 136.3, 135.6, 130.7, 129.4, 129.2, 128.4, 127.9, 127.2, 126.7, 122.1, 121.2, 118.2, 95.7, 89.7, 82.4, 61.4, 52.5, 29.8,

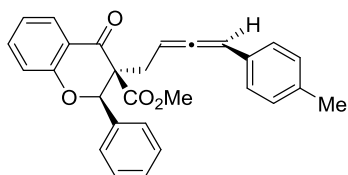



21.2. HPLC: Chiralcel OD-3 column, 254 nm, 30 °C, *n*-Hexane/*i*-PrOH = 97/3, flow = 0.8 mL/min, retention time 13.4 min and 19.4 min (major). HRMS Calculated for C<sub>28</sub>H<sub>28</sub>NO<sub>4</sub> [M+NH<sub>4</sub>]<sup>+</sup> 442.2013, found: 442.2010.

**(-)-Methyl 3-(4-(3-Fluorophenyl)buta-2,3-dien-1-yl)-4-oxo-2-phenylchromane-3-carboxylate (3bg):** 52.4 mg, 61% yield, pale yellow oil, new compound, R<sub>f</sub> = 0.21 (hexanes/ethyl acetate 20/1), 19:1 dr, 95% ee (major diastereoisomer), [α]<sub>D</sub><sup>20</sup> = -203.35 (*c* 1.01, CHCl<sub>3</sub>). The major diastereoisomer:

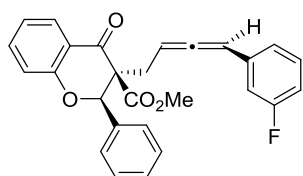

<sup>1</sup>H NMR (400 MHz, CDCl<sub>3</sub>) δ 8.00 (dd, *J* = 7.9, 1.3 Hz, 1H), 7.56-7.51 (m, 1H), 7.45-7.36 (m, 5H), 7.25-7.18 (m, 1H), 7.14-7.08 (m, 1H), 7.05-6.96 (m, 2H), 6.94-6.82 (m, 2H), 6.21-6.08 (m, 1H), 5.68 (s, 1H), 5.65-5.54 (m, 1H), 3.60 (s, 3H), 3.32-3.18 (m, 1H), 2.52-2.42 (m, 1H). <sup>13</sup>C NMR (100 MHz, CDCl<sub>3</sub>) δ 207.8, 189.7, 168.7, 163.1 (d, <sup>1</sup>*J*<sub>F-C</sub> = 244.1 Hz), 161.5, 136.3 (d, <sup>3</sup>*J*<sub>F-C</sub> = 8.7 Hz), 135.5, 130.0 (d, <sup>3</sup>*J*<sub>F-C</sub> = 8.4 Hz), 129.3, 128.5, 127.9, 127.2, 122.6 (d, <sup>4</sup>*J*<sub>F-C</sub> = 2.7 Hz), 122.1, 121.1, 118.2, 114.0 (d, <sup>2</sup>*J*<sub>F-C</sub> = 21.4 Hz), 113.4 (d, <sup>2</sup>*J*<sub>F-C</sub> = 22.1 Hz), 95.1 (d, <sup>4</sup>*J*<sub>F-C</sub> = 2.7 Hz), 90.2, 82.6, 61.3, 52.6, 29.6. <sup>19</sup>F NMR (376 MHz, CDCl<sub>3</sub>) δ -113.34. HPLC: Chiralpak IC column, 254 nm, 30 °C, *n*-Hexane/*i*-PrOH = 98/2, flow = 1.0 mL/min, retention time 25.6 min (major) and 32.0 min (minor). HRMS Calculated for C<sub>27</sub>H<sub>22</sub>FO<sub>4</sub> [M+H]<sup>+</sup> 429.1497, found: 429.1498.

**(-)-Methyl 3-(4-(3-Chlorophenyl)buta-2,3-dien-1-yl)-4-oxo-2-phenylchromane-3-carboxylate (3bh):** 58.6 mg, 66% yield, pale yellow oil, new compound, R<sub>f</sub> = 0.26 (hexanes/ethyl acetate 20/1), 19:1 dr, 98% ee (major diastereoisomer), [α]<sub>D</sub><sup>20</sup> = -189.99 (*c* 1.03, CHCl<sub>3</sub>). The major diastereoisomer:

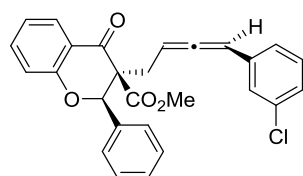

<sup>1</sup>H NMR (400 MHz, CDCl<sub>3</sub>) δ 8.00 (dd, *J* = 7.9, 1.5 Hz, 1H), 7.57-7.50 (m, 1H), 7.43-7.32 (m, 5H), 7.21-6.99 (m, 6H), 6.21-6.03 (m, 1H), 5.67 (s, 1H), 5.66-5.54 (m, 1H), 3.60 (s, 3H), 3.36-3.14 (m, 1H), 2.56-2.37 (m, 1H). <sup>13</sup>C NMR (100 MHz, CDCl<sub>3</sub>) δ 207.8, 189.7, 168.7, 161.5, 136.4, 135.9, 135.5, 134.6, 129.8, 129.3, 128.5, 127.9, 127.2, 127.2, 126.8, 125.0, 122.2, 121.1, 118.2, 94.9, 90.3, 82.6, 61.3, 52.6, 29.6. HPLC: Chiralpak IC column, 254 nm, 30 °C, *n*-Hexane/*i*-PrOH = 96.5/3.5, flow = 1.0 mL/min, retention time 20.3 min (major) and 22.6 min (minor). HRMS Calculated for C<sub>27</sub>H<sub>22</sub>ClO<sub>4</sub> [M+H]<sup>+</sup> 445.1201 (<sup>35</sup>Cl) and 447.1184 (<sup>37</sup>Cl), found: 445.1204 (<sup>35</sup>Cl) and 447.1181 (<sup>37</sup>Cl).

**(-)-Methyl 3-(4-(3-Bromophenyl)buta-2,3-dien-1-yl)-4-oxo-2-phenylchromane-3-carboxylate (3bi):** 55.4 mg, 57% yield, pale yellow oil, new compound, R<sub>f</sub> = 0.23 (hexanes/ethyl acetate 20/1), 19:1 dr, 99% ee (major diastereoisomer), [α]<sub>D</sub><sup>20</sup> = -199.54 (*c* 0.89, CHCl<sub>3</sub>). The major diastereoisomer:

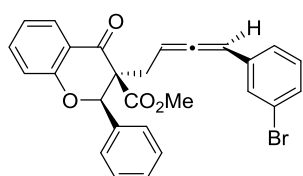

<sup>1</sup>H NMR (400 MHz, CDCl<sub>3</sub>) δ 8.01 (dd, *J* = 7.9, 1.3 Hz, 1H), 7.57-7.51 (m, 1H), 7.45-7.37 (m, 5H), 7.35-7.28 (m, 2H), 7.16-7.09 (m, 3H), 7.04-6.99 (m, 1H), 6.17-6.05 (m, 1H), 5.67 (s, 1H), 5.65-5.56 (m, 1H), 3.60 (s, 3H), 3.31-3.18 (m, 1H), 2.52-2.42 (m, 1H). <sup>13</sup>C NMR (100 MHz, CDCl<sub>3</sub>) δ 207.8, 189.7, 168.7, 161.5, 136.4, 136.1, 135.5, 130.1, 130.1, 129.7, 129.3, 128.5, 127.9, 127.2, 125.4, 122.8, 122.2, 121.1, 118.2, 94.8, 90.3, 82.6, 61.3, 52.6, 29.6. HPLC: Chiralpak AS-H + Chiralpak AS-H column, 254 nm, 30 °C, *n*-Hexane/*i*-PrOH = 97/3, flow = 0.7 mL/min, retention time 33.6 min (major) and 40.0 min (minor). HRMS Calculated for C<sub>27</sub>H<sub>22</sub>BrO<sub>4</sub> [M+H]<sup>+</sup> 489.0696 (<sup>79</sup>Br) and 491.0680 (<sup>81</sup>Br), found:

489.0699 (<sup>79</sup>Br) and 491.0681 (<sup>81</sup>Br).

**(-)-Methyl 3-(4-(3-Methoxyphenyl)buta-2,3-dien-1-yl)-4-oxo-2-phenylchromane-3-carboxylate (3bj):** 74.6 mg, 85% yield, colorless oil, new compound,  $R_f = 0.17$  (hexanes/ethyl acetate 20/1), 19:1 dr, 99% ee (major diastereoisomer),  $[\alpha]_D^{20} = -229.98$  ( $c$  1.07,  $\text{CHCl}_3$ ). The major diastereoisomer:

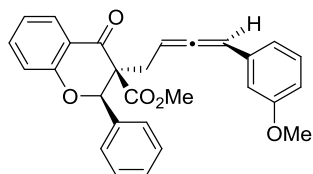

<sup>1</sup>H NMR (400 MHz,  $\text{CDCl}_3$ )  $\delta$  7.99 (d,  $J = 7.9$  Hz, 1H), 7.54-7.49 (m, 1H), 7.47-7.34 (m, 5H), 7.17 (t,  $J = 7.8$  Hz, 1H), 7.10 (t,  $J = 7.5$  Hz, 1H), 7.01 (d,  $J = 8.3$  Hz, 1H), 6.80 (d,  $J = 7.6$  Hz, 1H), 6.77-6.69 (m, 2H), 6.20-6.11 (m, 1H), 5.71 (s, 1H), 5.61-5.50 (m, 1H), 3.77 (s, 3H), 3.58 (s, 3H), 3.35-3.16 (m, 1H), 2.56-2.42 (m, 1H). <sup>13</sup>C NMR (100 MHz,  $\text{CDCl}_3$ )  $\delta$  207.6, 189.8, 168.8, 161.5, 159.9, 136.3, 135.6, 135.2, 129.6, 129.2, 128.4, 127.9, 127.2, 122.1, 121.2, 119.5, 118.2, 113.2, 111.8, 95.9, 89.9, 82.5, 61.4, 55.2, 52.6, 29.7. HPLC: Chiralpak IC column, 254 nm, 30 °C, *n*-Hexane/*i*-PrOH = 90/10, flow = 1.0 mL/min, retention time 16.0 min (major) and 17.8 min. HRMS Calculated for  $\text{C}_{28}\text{H}_{25}\text{O}_5$   $[\text{M}+\text{H}]^+$  441.1697, found: 441.1700.

**(-)-Methyl 4-Oxo-2-phenyl-3-(4-(thiophen-3-yl)buta-2,3-dien-1-yl)chromane-3-carboxylate (3bk):** 45.9 mg, 55% yield, colorless oil, new compound,  $R_f = 0.29$  (hexanes/ethyl acetate 20/1), 19:1 dr, 98% ee (major diastereoisomer),  $[\alpha]_D^{20} = -215.09$  ( $c$  0.92,  $\text{CHCl}_3$ ). The major diastereoisomer:

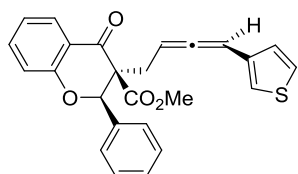

<sup>1</sup>H NMR (400 MHz,  $\text{CDCl}_3$ )  $\delta$  7.99 (dd,  $J = 7.9, 1.6$  Hz, 1H), 7.56-7.50 (m, 1H), 7.45-7.33 (m, 5H), 7.23-7.17 (m, 1H), 7.14-7.05 (m, 1H), 7.06-6.95 (m, 3H), 6.43-6.11 (m, 1H), 5.71 (s, 1H), 5.54-5.43 (m, 1H), 3.58 (s, 3H), 3.30-3.17 (m, 1H), 2.50-2.41 (m, 1H). <sup>13</sup>C NMR (100 MHz,  $\text{CDCl}_3$ )  $\delta$  207.8, 189.8, 168.8, 161.5, 136.3, 135.6, 135.0, 129.2, 128.4, 127.9, 127.2, 126.3, 126.0, 122.1, 121.2, 121.2, 118.2, 90.4, 89.0, 82.5, 61.4, 52.6, 29.8. HPLC: Chiralpak AD-3 column, 254 nm, 30 °C, *n*-Hexane/*i*-PrOH = 94/6, flow = 0.7 mL/min, retention time 23.7 min (major) and 24.7 min. HRMS Calculated for  $\text{C}_{25}\text{H}_{21}\text{O}_4\text{S}$   $[\text{M}+\text{H}]^+$  417.1155, found: 417.1151.

**(-)-Methyl (2R,3S)-3-((R)-4-(Naphthalen-2-yl)buta-2,3-dien-1-yl)-4-oxo-2-phenylchromane-3-carboxylate (3bl):** 68.5 mg, 74% yield, white solid, mp 69-70 °C, new compound,  $R_f = 0.24$  (hexanes/ethyl acetate 20/1), 16:1 dr, 97% ee (major diastereoisomer),  $[\alpha]_D^{20} = -172.74$  ( $c$  0.98,  $\text{CHCl}_3$ ). The major diastereoisomer:

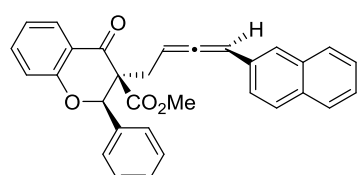

<sup>1</sup>H NMR (400 MHz,  $\text{CDCl}_3$ )  $\delta$  8.01 (dd,  $J = 7.9, 1.5$  Hz, 1H), 7.81-7.69 (m, 3H), 7.60-7.54 (m, 1H), 7.53-7.31 (m, 9H), 7.14-7.06 (m, 1H), 6.99 (d, 1H), 6.46-6.28 (m, 1H), 5.75 (s, 1H), 5.71-5.57 (m, 1H), 3.58 (s, 3H), 3.38-3.18 (m, 1H), 2.59-2.44 (m, 1H). <sup>13</sup>C NMR (100 MHz,  $\text{CDCl}_3$ )  $\delta$  208.1, 189.8, 168.9, 161.5, 136.3, 135.6, 133.6, 132.7, 131.3, 129.2, 128.5, 128.3, 127.9, 127.8, 127.7, 127.2, 126.3, 125.8, 124.7, 122.1, 121.2, 118.2, 96.2, 90.0, 82.5, 61.5, 52.6, 29.8. HPLC: Chiralpak IC column, 254 nm, 30 °C, *n*-Hexane/*i*-PrOH = 90/10, flow = 1.0 mL/min, retention time 15.7 min (major) and 17.8 min (minor). HRMS Calculated for  $\text{C}_{31}\text{H}_{25}\text{O}_4$   $[\text{M}+\text{H}]^+$  461.1747, found: 461.1746.

---

**(-)-Methyl 2-Methyl-4-oxo-3-(4-(*m*-tolyl)buta-2,3-dien-1-yl)chromane-3-carboxylate (3he):**

59.7 mg, 82% yield, pale yellow oil, new compound,  $R_f = 0.35$  (hexanes/ethyl acetate 20/1), 8:1 dr, 95% ee (major diastereoisomer),  $[\alpha]_D^{20} = -79.83$  ( $c$  1.19,  $\text{CHCl}_3$ ). The major diastereoisomer:  $^1\text{H}$

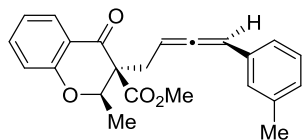

NMR (400 MHz,  $\text{CDCl}_3$ )  $\delta$  7.95 (dd,  $J = 7.8, 1.2$  Hz, 1H), 7.56-7.42 (m, 1H), 7.21-7.12 (m, 1H), 7.12-6.82 (m, 5H), 6.25-6.00 (m, 1H), 5.53-5.33 (m, 1H), 4.72 (q,  $J = 6.5$  Hz, 1H), 3.62 (s, 3H), 3.39-3.23 (m, 1H), 2.75-2.61 (m, 1H), 2.30 (s, 3H), 1.59 (d,  $J = 6.5$  Hz, 3H).

$^{13}\text{C}$  NMR (100 MHz,  $\text{CDCl}_3$ )  $\delta$  207.2, 189.9, 169.4, 161.4, 138.2, 135.9, 133.7, 128.5, 128.0, 127.9, 127.5, 124.1, 121.7, 121.3, 117.8, 95.0, 88.8, 78.2, 59.9, 52.7, 29.9, 21.4, 16.1. HPLC: Chiralpak ID column, 254 nm, 30 °C, *n*-Hexane/*i*-PrOH = 99/1, flow = 1.0 mL/min, retention time 18.7 min (major) and 20.9 min (minor). HRMS Calculated for  $\text{C}_{23}\text{H}_{23}\text{O}_4$   $[\text{M}+\text{H}]^+$  363.1591, found: 363.1598.

---

**(-)-Methyl 2-Benzyl-4-oxo-3-(4-(*m*-tolyl)buta-2,3-dien-1-yl)chromane-3-carboxylate (3ie):**

The reaction was conducted at -20 °C for 96 h. 51.4 mg, 59% yield, pale yellow oil, new compound,  $R_f = 0.41$  (hexanes/ethyl acetate 20/1), 7:1 dr, 98% ee (major diastereoisomer),  $[\alpha]_D^{20}$

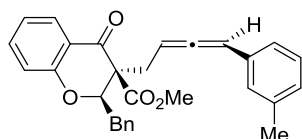

= -220.59 ( $c$  0.99,  $\text{CHCl}_3$ ). The major diastereoisomer:  $^1\text{H}$  NMR (400 MHz,  $\text{CDCl}_3$ )  $\delta$  7.94 (dd,  $J = 7.9, 1.6$  Hz, 1H), 7.45-7.40 (m, 1H), 7.37-7.30 (m, 4H), 7.29-7.24 (m, 1H), 7.17-7.13 (m, 1H), 7.07-6.97 (m, 4H), 6.90-6.83 (m, 1H), 6.16-6.02 (m, 1H), 5.54-5.37 (m, 1H),

4.79 (dd,  $J = 10.2, 1.9$  Hz, 1H), 3.67 (s, 3H), 3.54-3.37 (m, 1H), 3.26 (dd,  $J = 14.8, 1.9$  Hz, 1H), 3.20-3.09 (m, 1H), 2.91-2.78 (m, 1H), 2.29 (s, 3H).  $^{13}\text{C}$  NMR (100 MHz,  $\text{CDCl}_3$ )  $\delta$  207.4, 189.7, 169.7, 161.2, 138.3, 138.0, 136.0, 133.7, 129.5, 128.6, 128.5, 128.1, 127.9, 127.6, 126.8, 124.2, 121.9, 121.4, 118.0, 95.4, 88.9, 82.7, 60.0, 52.9, 36.3, 30.4, 21.4. HPLC: Chiralpak AD-H + AD-H column, 254 nm, 30 °C, *n*-Hexane/*i*-PrOH = 95/5, flow = 0.9 mL/min, retention time 18.2 min and 26.5 min (major). HRMS Calculated for  $\text{C}_{29}\text{H}_{26}\text{NaO}_4$   $[\text{M}+\text{Na}]^+$  461.1723, found: 461.1720.

---

**(-)-Methyl 2-Cyclohexyl-4-oxo-3-(4-(*m*-tolyl)buta-2,3-dien-1-yl)chromane-3-carboxylate (3je):**

The reaction was conducted at -20 °C for 96 h. 24.3 mg, 28% yield, pale yellow oil, new compound,  $R_f = 0.46$  (hexanes/ethyl acetate 20/1), 9:1 dr, 99% ee (major diastereoisomer),  $[\alpha]_D^{20}$

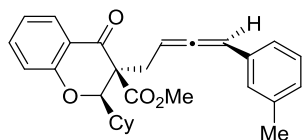

= -112.94 ( $c$  0.61,  $\text{CHCl}_3$ ). The major diastereoisomer:  $^1\text{H}$  NMR (400 MHz,  $\text{CDCl}_3$ )  $\delta$  7.92 (d,  $J = 7.0$  Hz, 1H), 7.58-7.41 (m, 1H), 7.22-7.12 (m, 1H), 7.11-6.89 (m, 5H), 6.08-5.96 (m, 1H), 5.45-5.25 (m, 1H), 4.45 (s, 1H), 3.60 (s, 3H), 3.48-3.30 (m, 1H), 2.87-2.68 (m, 1H),

2.31 (s, 3H), 1.95-1.60 (m, 6H), 1.48-1.07 (m, 5H).  $^{13}\text{C}$  NMR (100 MHz,  $\text{CDCl}_3$ )  $\delta$  207.3, 190.1, 170.2, 162.1, 138.2, 135.9, 133.8, 128.5, 128.0, 127.9, 127.5, 124.1, 121.4, 120.9, 117.8, 94.7, 89.1, 85.4, 58.6, 52.6, 38.0, 32.3, 30.3, 26.8, 26.3, 26.1, 25.8, 21.3. HPLC: Chiralcel OD-H + IC, 254 nm, 30 °C, *n*-Hexane/*i*-PrOH = 97/3, flow = 0.8 mL/min, retention time 22.5 min and 32.6 min (major). HRMS Calculated for  $\text{C}_{28}\text{H}_{30}\text{NaO}_4$   $[\text{M}+\text{Na}]^+$  453.2036, found: 453.2041.

---

**(-)-Methyl 4-Oxo-2-(*o*-tolyl)-3-(4-(*m*-tolyl)buta-2,3-dien-1-yl)chromane-3-carboxylate (3ke):**

81.2 mg, 93% yield, pale yellow oil, new compound,  $R_f = 0.26$  (hexanes/ethyl acetate 20/1), 19:1

dr, 99% ee (major diastereoisomer),  $[\alpha]_D^{20} = -178.35$  ( $c$  0.98,  $\text{CHCl}_3$ ). The major diastereoisomer:  $^1\text{H}$  NMR (400 MHz,  $\text{CDCl}_3$ )  $\delta$  8.01 (dd,  $J = 7.9, 1.6$  Hz, 1H), 7.52-7.43 (m, 1H), 7.42-7.37 (m, 1H), 7.29-7.19 (m, 3H), 7.14-7.06 (m, 2H), 7.00-6.86 (m, 4H), 6.01-5.88 (m, 1H), 5.84 (s, 1H), 5.67-5.49 (m, 1H), 3.62 (s, 3H), 3.25-3.08 (m, 1H), 2.55-2.46 (m, 1H), 2.45 (s, 3H), 2.26 (s, 3H).  $^{13}\text{C}$  NMR (100 MHz,  $\text{CDCl}_3$ )  $\delta$  207.0, 190.3, 169.5, 161.3, 138.1, 136.7, 136.1, 133.9, 133.7, 131.0, 129.1, 128.4, 127.9, 127.9, 127.6, 127.5, 126.0, 124.1, 122.0, 121.3, 118.1, 96.4, 89.8, 79.7, 61.2, 52.6, 30.5, 21.3, 20.2. HPLC: Chiralpak AD-H column, 254 nm, 30 °C,  $n$ -Hexane/ $i$ -PrOH = 97/3, flow = 1.0 mL/min, retention time 16.0 min (major) and 17.4 min. HRMS Calculated for  $\text{C}_{29}\text{H}_{27}\text{O}_4$   $[\text{M}+\text{H}]^+$  439.1904, found: 439.1901.

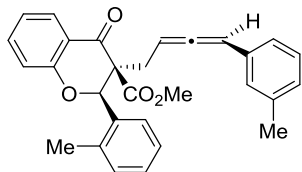

**(-)-Methyl 4-Oxo-2-(*m*-tolyl)-3-(4-(*m*-tolyl)buta-2,3-dien-1-yl)chromane-3-carboxylate (3le):** 85.2 mg, 97% yield, pale yellow oil, new compound,  $R_f = 0.28$  (hexanes/ethyl acetate 20/1), 24:1 dr, 98% ee (major diastereoisomer),  $[\alpha]_D^{20} = -217.08$  ( $c$  1.00,  $\text{CHCl}_3$ ). The major diastereoisomer:  $^1\text{H}$  NMR (400 MHz,  $\text{CDCl}_3$ )  $\delta$  8.00 (dd,  $J = 7.9, 1.4$  Hz, 1H), 7.55-7.48 (m, 1H), 7.30-7.20 (m, 3H), 7.19-7.07 (m, 3H), 7.05-6.94 (m, 4H), 6.21-6.10 (m, 1H), 5.68 (s, 1H), 5.59-5.46 (m, 1H), 3.59 (s, 3H), 3.33-3.16 (m, 1H), 2.50-2.42 (m, 1H), 2.34 (s, 3H), 2.29 (s, 3H).  $^{13}\text{C}$  NMR (100 MHz,  $\text{CDCl}_3$ )  $\delta$  207.7, 189.8, 168.9, 161.6, 138.2, 138.0, 136.3, 135.5, 133.7, 129.9, 128.6, 128.3, 128.0, 127.9, 127.5, 124.2, 124.0, 122.0, 121.2, 118.3, 95.8, 89.7, 82.6, 61.4, 52.5, 29.7, 21.6, 21.4. HPLC: Chiralpak AD-H column, 254 nm, 30 °C,  $n$ -Hexane/ $i$ -PrOH = 97/3, flow = 1.0 mL/min, retention time 12.5 min and 14.1 min (major). HRMS Calculated for  $\text{C}_{29}\text{H}_{27}\text{O}_4$   $[\text{M}+\text{H}]^+$  439.1904, found: 439.1903.

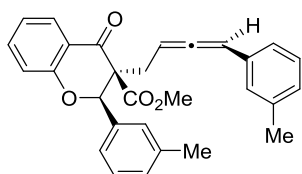

**(-)-Methyl 4-Oxo-2-(*p*-tolyl)-3-(4-(*m*-tolyl)buta-2,3-dien-1-yl)chromane-3-carboxylate (3me):** 81.3 mg, 93% yield, pale yellow oil, new compound,  $R_f = 0.28$  (hexanes/ethyl acetate 20/1), 24:1 dr, 98% ee (major diastereoisomer),  $[\alpha]_D^{20} = -235.96$  ( $c$  1.02,  $\text{CHCl}_3$ ). The major diastereoisomer:  $^1\text{H}$  NMR (400 MHz,  $\text{CDCl}_3$ )  $\delta$  7.99 (dd,  $J = 7.9, 1.3$  Hz, 1H), 7.54-7.47 (m, 1H), 7.35-7.28 (m, 2H), 7.22-7.05 (m, 4H), 7.05-6.92 (m, 4H), 6.25-6.04 (m, 1H), 5.68 (s, 1H), 5.59-5.40 (m, 1H), 3.59 (s, 3H), 3.35-3.21 (m, 1H), 2.49-2.41 (m, 1H), 2.35 (s, 3H), 2.29 (s, 3H).  $^{13}\text{C}$  NMR (100 MHz,  $\text{CDCl}_3$ )  $\delta$  207.6, 189.9, 169.0, 161.6, 139.0, 138.2, 136.2, 133.7, 132.6, 129.1, 128.5, 128.0, 127.9, 127.5, 127.1, 124.0, 122.0, 121.2, 118.2, 95.8, 89.7, 82.5, 61.4, 52.6, 29.7, 21.4, 21.3. HPLC: Chiralpak AD-H column, 254 nm, 30 °C,  $n$ -Hexane/ $i$ -PrOH = 97/3, flow = 1.0 mL/min, retention time 13.8 min and 22.4 min (major). HRMS Calculated for  $\text{C}_{29}\text{H}_{27}\text{O}_4$   $[\text{M}+\text{H}]^+$  439.1904, found: 439.1901.

**(-)-Methyl 2-(4-fluorophenyl)-4-oxo-3-(4-(*m*-tolyl)buta-2,3-dien-1-yl)chromane-3-carboxylate (3ne):** 79.4 mg, 90% yield, pale yellow oil, new compound,  $R_f = 0.30$  (hexanes/ethyl acetate 20/1), 24:1 dr, 98% ee (major diastereoisomer),  $[\alpha]_D^{20} = -250.80$  ( $c$  0.98,  $\text{CHCl}_3$ ). The major diastereoisomer:  $^1\text{H}$  NMR (400 MHz,  $\text{CDCl}_3$ )  $\delta$  8.00 (dd,  $J = 7.9, 1.6$  Hz, 1H), 7.55-7.48 (m, 1H), 7.47-7.38 (m, 2H), 7.20-6.95 (m, 8H), 6.28-6.06

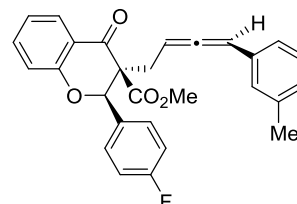

(m, 1H), 5.70 (s, 1H), 5.62-5.44 (m, 1H), 3.58 (s, 3H), 3.36-3.24 (m, 1H), 2.48-2.39 (m, 1H), 2.29 (s, 3H). <sup>13</sup>C NMR (100 MHz, CDCl<sub>3</sub>) δ 207.6, 189.6, 168.8, 163.0 (d, <sup>1</sup>J<sub>F-C</sub> = 246.7 Hz), 161.4, 138.3, 136.4, 133.5, 131.5 (d, <sup>4</sup>J<sub>F-C</sub> = 3.4 Hz), 129.1 (d, <sup>3</sup>J<sub>F-C</sub> = 8.1 Hz), 128.6, 128.1, 127.9, 127.5, 124.0, 122.2, 121.1, 118.2, 115.4 (d, <sup>2</sup>J<sub>F-C</sub> = 21.4 Hz), 95.9, 89.6, 81.8, 61.4, 52.6, 29.7, 21.4. <sup>19</sup>F NMR (376 MHz, CDCl<sub>3</sub>) δ -112.10. HPLC: Chiralpak ID column, 254 nm, 30 °C, *n*-Hexane/*i*-PrOH = 97/3, flow = 1.0 mL/min, retention time 13.5 min (major) and 17.5 min. HRMS Calculated for C<sub>28</sub>H<sub>24</sub>FO<sub>4</sub> [M+H]<sup>+</sup> 443.1653, found: 443.1652.

**(-)-Methyl 2-(4-Chlorophenyl)-4-oxo-3-(4-(*m*-tolyl)buta-2,3-dien-1-yl)chromane-3-carboxylate (3oe):** 88.2 mg, 96% yield, pale yellow oil, new compound, R<sub>f</sub> = 0.31 (hexanes/ethyl acetate 20/1), 24:1 dr, 98% ee (major diastereoisomer), [α]<sub>D</sub><sup>20</sup> = -233.51 (c 1.02, CHCl<sub>3</sub>). The major diastereoisomer:

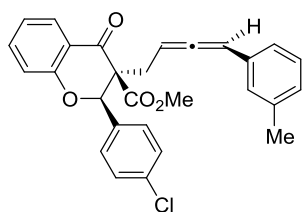

<sup>1</sup>H NMR (400 MHz, CDCl<sub>3</sub>) δ 8.00 (dd, *J* = 7.9, 1.6 Hz, 1H), 7.55-7.48 (m, 1H), 7.44-7.30 (m, 4H), 7.18-7.07 (m, 2H), 7.04-6.95 (m, 4H), 6.23-6.07 (m, 1H), 5.69 (s, 1H), 5.60-5.45 (m, 1H), 3.58 (s, 3H), 3.34-3.25 (m, 1H), 2.48-2.40 (m, 1H), 2.29 (s, 3H). <sup>13</sup>C NMR (100 MHz, CDCl<sub>3</sub>) δ 207.6, 189.4, 168.7, 161.3, 138.3, 136.4, 135.0, 134.1, 133.5, 128.6, 128.6, 128.6, 128.1, 127.9, 127.5,

124.0, 122.3, 121.1, 118.2, 96.0, 89.6, 81.8, 61.3, 52.7, 29.7, 21.4. HPLC: Chiralpak ID column, 254 nm, 30 °C, *n*-Hexane/*i*-PrOH = 97/3, flow = 1.0 mL/min, retention time 13.6 min (major) and 17.6 min. HRMS Calculated for C<sub>28</sub>H<sub>24</sub>ClO<sub>4</sub> [M+H]<sup>+</sup> 459.1358 (<sup>35</sup>Cl) and 461.1342 (<sup>37</sup>Cl), found: 459.1360 (<sup>35</sup>Cl) and 461.1334 (<sup>37</sup>Cl).

**(-)-Methyl 2-(4-Bromophenyl)-4-oxo-3-(4-(*m*-tolyl)buta-2,3-dien-1-yl)chromane-3-carboxylate (3pe):** 96.2 mg, 96% yield, pale yellow oil, new compound, R<sub>f</sub> = 0.31 (hexanes/ethyl acetate 20/1), 24:1 dr, 98% ee (major diastereoisomer), [α]<sub>D</sub><sup>20</sup> = -208.29 (c 1.00, CHCl<sub>3</sub>). The major diastereoisomer:

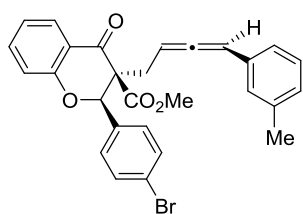

<sup>1</sup>H NMR (400 MHz, CDCl<sub>3</sub>) δ 7.99 (dd, *J* = 7.9, 1.6 Hz, 1H), 7.56-7.47 (m, 3H), 7.37-7.29 (m, 2H), 7.19-7.08 (m, 2H), 7.05-6.95 (m, 4H), 6.22-6.07 (m, 1H), 5.67 (s, 1H), 5.59-5.44 (m, 1H), 3.58 (s, 3H), 3.35-3.24 (m, 1H), 2.48-2.40 (m, 1H), 2.29 (s, 3H). <sup>13</sup>C NMR (100 MHz, CDCl<sub>3</sub>) δ 207.6, 189.4, 168.7, 161.3, 138.3, 136.4, 134.6, 133.5, 131.6, 128.9, 128.6, 128.2, 127.9, 127.5, 124.0, 123.3,

122.3, 121.1, 118.2, 96.0, 89.6, 81.8, 61.3, 52.7, 29.7, 21.4. HPLC: Chiralpak IC column, 254 nm, 30 °C, *n*-Hexane/*i*-PrOH = 97/3, flow = 1.0 mL/min, retention time 19.4 min (major) and 21.8 min. HRMS Calculated for C<sub>28</sub>H<sub>24</sub>BrO<sub>4</sub> [M+H]<sup>+</sup> 503.0852 (<sup>79</sup>Br) and 505.0836 (<sup>81</sup>Br), found: 503.0855 (<sup>79</sup>Br) and 505.0831 (<sup>81</sup>Br).

**(-)-Methyl 2-(4-Methoxyphenyl)-4-oxo-3-(4-(*m*-tolyl)buta-2,3-dien-1-yl)chromane-3-carboxylate (3qe):** 85.7 mg, 94% yield, pale yellow oil, new compound, R<sub>f</sub> =

0.15 (hexanes/ethyl acetate 20/1), 16:1 dr, 98% ee (major diastereoisomer), [α]<sub>D</sub><sup>20</sup> = -224.68 (c 0.98, CHCl<sub>3</sub>). The major diastereoisomer: <sup>1</sup>H NMR (400 MHz, CDCl<sub>3</sub>) δ 7.99 (dd, *J* = 7.9, 1.6 Hz, 1H), 7.54-7.48 (m, 1H), 7.39-7.31 (m, 2H), 7.19-7.06 (m, 2H), 7.06-6.96 (m, 4H), 6.94-6.87 (m, 2H), 6.24-6.07 (m, 1H), 5.66 (s, 1H), 5.60-5.46 (m, 1H), 3.80 (s, 3H), 3.60 (s, 3H), 3.36-3.22 (m, 1H), 2.49-2.39 (m, 1H), 2.29 (s, 3H). <sup>13</sup>C

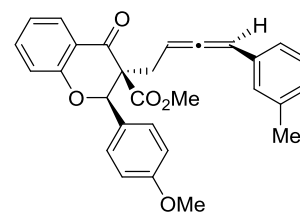

NMR (100 MHz, CDCl<sub>3</sub>)  $\delta$  207.6, 190.0, 169.0, 161.7, 160.1, 138.2, 136.3, 133.7, 128.5, 128.0, 127.9, 127.6, 127.5, 124.0, 122.0, 121.2, 118.2, 113.8, 95.7, 89.7, 82.3, 61.5, 55.3, 52.6, 29.7, 21.4. HPLC: Chiralpak AD-H column, 254 nm, 30 °C, *n*-Hexane/*i*-PrOH = 90/10, flow = 1.0 mL/min, retention time 12.4 min and 13.2 min (major). HRMS Calculated for C<sub>29</sub>H<sub>27</sub>O<sub>5</sub> [M+H]<sup>+</sup> 455.1853, found: 455.1856.

---

**(-)-Methyl 6-Methyl-4-oxo-2-(*p*-tolyl)-3-(4-(*m*-tolyl)buta-2,3-dien-1-yl)chromane-3-carboxylate (3re):** 85.7 mg, 95% yield, pale yellow oil, new compound, R<sub>f</sub> = 0.34 (hexanes/ethyl acetate 20/1), 12:1 dr, 97% ee (major diastereoisomer), [α]<sub>D</sub><sup>20</sup> = -224.31 (*c* 0.97, CHCl<sub>3</sub>). The major diastereoisomer:

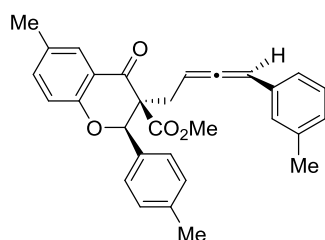

<sup>1</sup>H NMR (400 MHz, CDCl<sub>3</sub>)  $\delta$  7.77 (d, *J* = 1.4 Hz, 1H), 7.36-7.26 (m, 3H), 7.21-7.06 (m, 3H), 7.05-6.95 (m, 3H), 6.94-6.88 (m, 1H), 6.24-6.03 (m, 1H), 5.65 (s, 1H), 5.60-5.42 (m, 1H), 3.59 (s, 3H), 3.34-3.22 (m, 1H), 2.48-2.40 (m, 1H), 2.34 (s, 6H), 2.29 (s, 3H). <sup>13</sup>C NMR (100 MHz, CDCl<sub>3</sub>)  $\delta$  207.6, 190.1, 169.1, 159.8, 139.0, 138.2, 137.4, 133.8, 132.7, 131.4, 129.1, 128.5, 128.0, 127.5, 127.4, 127.1, 124.1, 120.8, 118.0, 95.7, 89.7, 82.5, 61.4, 52.5, 29.7, 21.4, 21.3, 20.6. HPLC: Chiralpak IC column, 254 nm, 30 °C, *n*-Hexane/*i*-PrOH = 97/3, flow = 1.0 mL/min, retention time 25.6 min (minor) and 28.1 min (major). The HRMS Calculated for C<sub>30</sub>H<sub>29</sub>O<sub>4</sub> [M+H]<sup>+</sup> 453.2060, found: 453.2060.

---

**(-)-Methyl 6-Chloro-4-oxo-2-(*p*-tolyl)-3-(4-(*m*-tolyl)buta-2,3-dien-1-yl)chromane-3-carboxylate (3se):** 87.6 mg, 93% yield, colorless oil, new compound, R<sub>f</sub> = 0.42 (hexanes/ethyl acetate 20/1), 16:1 dr, 99% ee (major diastereoisomer), [α]<sub>D</sub><sup>20</sup> = -242.27 (*c* 1.05, CHCl<sub>3</sub>). The major diastereoisomer:

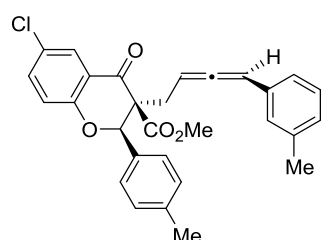

<sup>1</sup>H NMR (400 MHz, CDCl<sub>3</sub>)  $\delta$  7.91 (d, *J* = 2.6 Hz, 1H), 7.41 (dd, *J* = 8.8, 2.7 Hz, 1H), 7.33-7.26 (m, 2H), 7.23-7.16 (m, 2H), 7.16-7.11 (m, 1H), 7.03-6.86 (m, 4H), 6.23-6.06 (m, 1H), 5.66 (s, 1H), 5.59-5.45 (m, 1H), 3.60 (s, 3H), 3.30-3.15 (m, 1H), 2.47-2.40 (m, 1H), 2.36 (s, 3H), 2.28 (s, 3H). <sup>13</sup>C NMR (100 MHz, CDCl<sub>3</sub>)  $\delta$  207.7, 189.0, 168.7, 160.0, 139.2, 138.3, 136.0, 133.5, 132.2, 129.2, 128.5, 128.1, 127.5, 127.5, 127.1, 127.1, 124.0, 122.0, 120.0, 96.2, 89.3, 82.6, 61.2, 52.7, 29.6, 21.4, 21.3. HPLC: Chiralpak IC column, 254 nm, 30 °C, *n*-Hexane/*i*-PrOH = 98/2, flow = 1.0 mL/min, retention time 17.0 min and 23.4 min (major). HRMS Calculated for C<sub>29</sub>H<sub>26</sub>ClO<sub>4</sub> [M+H]<sup>+</sup> 473.1514 (<sup>35</sup>Cl) and 475.1499 (<sup>37</sup>Cl), found: 473.1514 (<sup>35</sup>Cl) and 475.1500 (<sup>37</sup>Cl).

#### 4. Experiment at Gram Scale

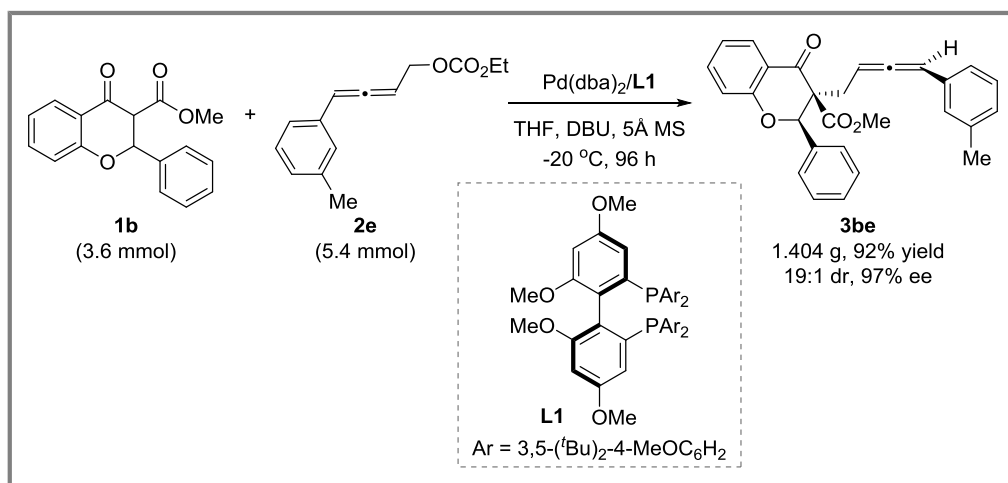

The metal precursor  $\text{Pd}(\text{dba})_2$  (0.36 mmol, 0.207 g), the chiral ligand (*R*)-DTBM-GARPHOS (**L1**) (0.396 mmol, 0.480 g) and tetrahydrofuran (34 mL) were placed in a dried Schlenk tube under nitrogen atmosphere. The mixture was stirred at  $30\text{ }^\circ\text{C}$  for 30 min. Then, the mixture was cooled to  $-20\text{ }^\circ\text{C}$ . Subsequently, the substrate flavanone **1b** (3.6 mmol, 1.016 g), 5Å MS (0.900 g) and 1,8-dia-zabicyclo[5,4,0]undec-7-ene (DBU, 4.32 mmol, 0.65 mL) were added, and the reaction mixture was stirred at  $-20\text{ }^\circ\text{C}$  for 10 minutes. Sequentially, allenyl carbonate **2e** (5.4 mmol, 1.254 g) and tetrahydrofuran (2.0 mL) were added slowly. The mixture was stirred at  $-20\text{ }^\circ\text{C}$  for 96 hours. After the completion of the reaction, without any treatment, the residue was directly purified by column chromatography on silica gel (hexanes/ethyl acetate/dichloromethane 100/1/2-100/3/6) to give the chiral allenylc alkylation product **3be** 1.404 g with 92% isolated yield, 19:1 dr and 97% ee for the major diastereoisomer.

## 5. Product Elaboration

### 5.1. The Reduction of Carbonyl Functional Group

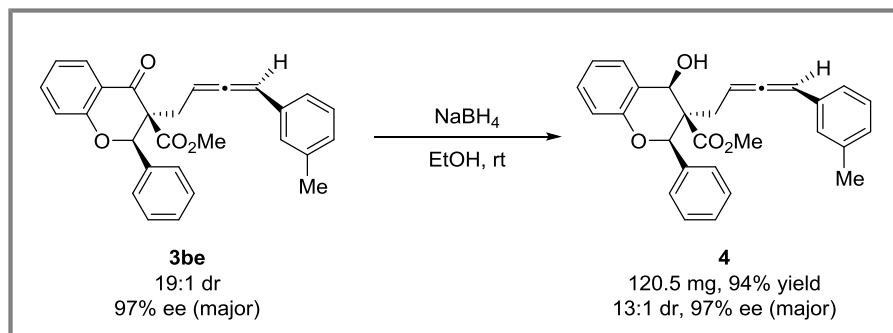

To a solution of flavanone (-)-**3be** (127.4 mg, 0.3 mmol) in ethanol (15 mL) was added sodium borohydride (56.7 mg, 1.5 mmol) at ambient temperature. The reaction mixture was stirred for 12 h. The reaction was quenched with saturated ammonium chloride aqueous solution (10 mL). The aqueous layer was extracted with ethyl acetate (15 mL×3), dried over sodium sulfate, filtered and concentrated under the reduced pressure. The residue was purified by column chromatography on silica gel using hexanes/ethyl acetate (20/1-10/1) as eluent to afford reductive product (-)-**4**.

**(-)-Methyl 4-Hydroxy-2-phenyl-3-(4-(*m*-tolyl)buta-2,3-dien-1-yl)chromane-3-carboxylate (4):** 120.5 mg, 94% yield, colorless liquid, new compound,  $R_f = 0.31$  (hexanes/ethyl acetate 10/1), 13:1 dr, 97% ee (major diastereoisomer),  $[\alpha]_D^{20} = -129.16$  ( $c$  1.21, CHCl<sub>3</sub>). The major diastereoisomer: <sup>1</sup>H NMR (400 MHz, CDCl<sub>3</sub>)  $\delta$  7.57 (d,  $J = 7.6$  Hz, 1H), 7.38-7.30 (m, 5H), 7.23-7.14 (m, 2H), 7.09-6.95 (m, 4H), 6.88 (d,  $J = 8.0$  Hz, 1H), 6.19-6.10 (m, 1H), 5.82-5.66 (m, 1H), 5.16 (d,  $J = 9.7$  Hz, 1H), 5.08 (s, 1H), 3.54 (s, 3H), 2.96 (d,  $J = 9.8$  Hz, 1H), 2.74-2.65 (m, 1H), 2.38-2.31 (m, 1H), 2.29 (s, 3H). <sup>13</sup>C NMR (100 MHz, CDCl<sub>3</sub>)  $\delta$  206.9, 171.6, 154.3, 138.3, 136.5, 134.0, 128.9, 128.7, 128.6, 128.0, 127.9, 127.9, 127.5, 125.4, 124.1, 121.8, 116.2, 94.8, 90.0, 82.2, 70.6, 53.9, 51.8, 34.3, 21.4. HPLC: Chiralpak ID column, 254 nm, 30 °C, *n*-Hexane/*i*-PrOH = 90/10, flow = 1.0 mL/min, retention time 11.0 min (major) and 15.9 min (minor). HRMS Calculated for C<sub>28</sub>H<sub>26</sub>NaO<sub>4</sub> [M+Na]<sup>+</sup> 449.1723, found: 449.1723.

### 5.2. The Hydrogenation of Allenyl Functional Group

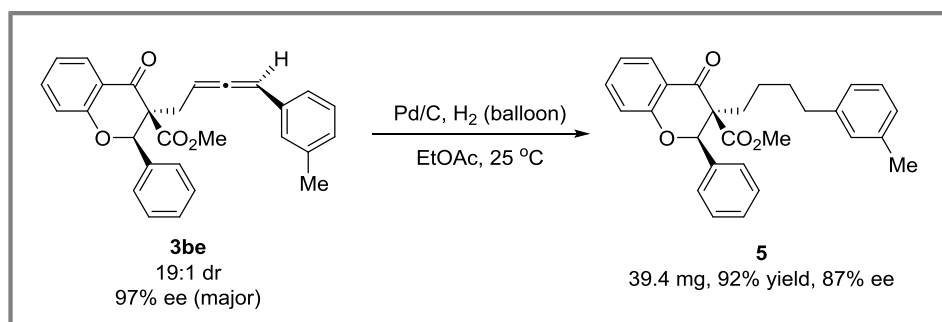

To a solution of the chiral allenyl alkylation product (-)-**3be** (42.5 mg, 0.1 mmol) in ethyl acetate (1.0 mL) was added 10% Pd/C (5.3 mg, 0.005 mmol). The resulting mixture was degassed and stirred under hydrogen gas balloon pressure for about 5 hours at 25 °C. After the completion of hydrogenation, the volatiles were removed under the reduced pressure. The crude residue was



purified by flash column chromatography on silica gel using hexanes/ethyl acetate (30/1-20/1) as eluent to give the desirable allene hydrogenation product (2*R*,3*S*)-(-)-**5**.

---

**(2*R*,3*S*)-(-)-Methyl 4-Oxo-2-phenyl-3-(4-(*m*-tolyl)butyl)chromane-3-carboxylate (5):**

39.4 mg, 92% yield, colorless liquid, new compound,  $R_f = 0.28$  (hexanes/ethyl acetate 20/1), 87% ee,  $[\alpha]_D^{20} = -107.89$  ( $c$  0.95,  $\text{CHCl}_3$ ).  $^1\text{H NMR}$  (400 MHz,  $\text{CDCl}_3$ )  $\delta$  7.99 (d,  $J = 7.5$  Hz, 1H), 7.51 (t,  $J = 7.3$  Hz, 1H), 7.43-7.32 (m, 3H), 7.33-7.25 (m, 2H), 7.19-6.89 (m, 6H), 5.47 (s, 1H), 3.57 (s, 3H), 2.66-2.49 (m, 2H), 2.32 (s, 3H), 2.29-2.16 (m, 1H), 1.74-1.55 (m, 4H), 1.39-1.26 (m, 1H).  $^{13}\text{C NMR}$  (100 MHz,  $\text{CDCl}_3$ )  $\delta$  190.6, 169.4, 161.5, 142.2, 137.9, 136.1, 135.6, 129.2, 129.1, 128.3, 128.2, 128.0, 127.2, 126.5, 125.4, 122.0, 121.4, 118.1, 83.2, 61.6, 52.3, 35.3, 31.9, 30.1, 23.8, 21.5. HPLC: Chiralpak IA column, 254 nm, 30 °C,  $n$ -Hexane/*i*-PrOH = 99/1, flow = 1.0 mL/min, retention time 16.6 min (minor) and 17.6 min (major). HRMS Calculated for  $\text{C}_{28}\text{H}_{29}\text{O}_4$   $[\text{M}+\text{H}]^+$  429.2060, found: 429.2066.

---

## 6. Determination of Absolute Configuration

To determine the absolute configuration of (-)-methyl 3-(4-(naphthalen-2-yl)buta-2,3-dien-1-yl)-4-oxo-2-phenylchromane-3-carboxylate (**3bl**, 16:1 dr, 97% ee): first, (-)-**3bl** was upgraded to 32:1 dr and 98% ee for major diastereoisomer by recrystallization with *n*-hexane/dichloromethane. Then (-)-**3bl** was completely dissolved in dichloromethane (2.0 mL), and *n*-hexane (2.0 mL) was added slowly at room temperature. The solvent diffused slowly, and the single crystal was obtained after about two days. The structure in **Figure S1** showed the absolute configuration is (2*R*,3*S*,*R*<sub>a</sub>). The CCDC number is 2226434. These details can be obtained free of charge via [www.ccdc.com.ac.uk/data\\_request/cif](http://www.ccdc.com.ac.uk/data_request/cif) from the Cambridge Crystallographic Data Centre.

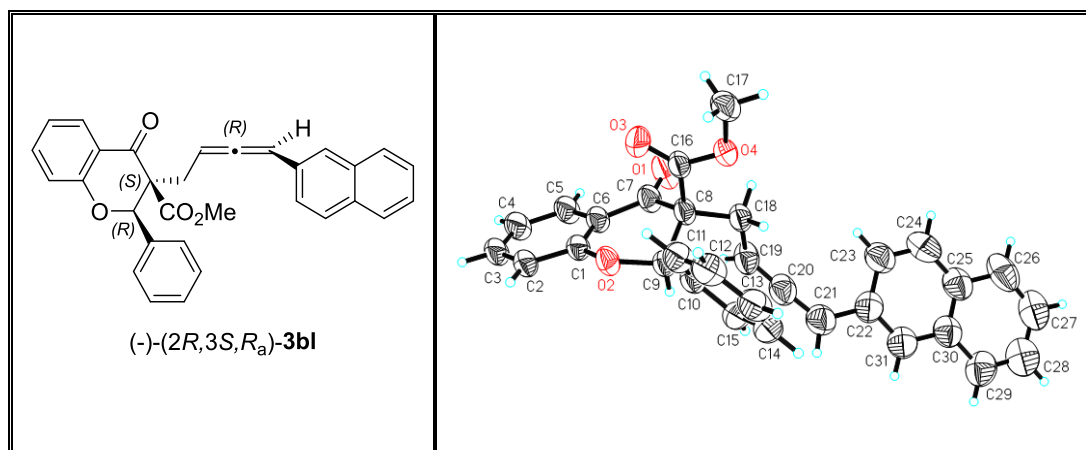

**Figure S1.** X-Ray Structure of (-)-(2*R*,3*S*,*R*<sub>a</sub>)-**3bl**

### Thermal Ellipsoid Plot for **3bl**

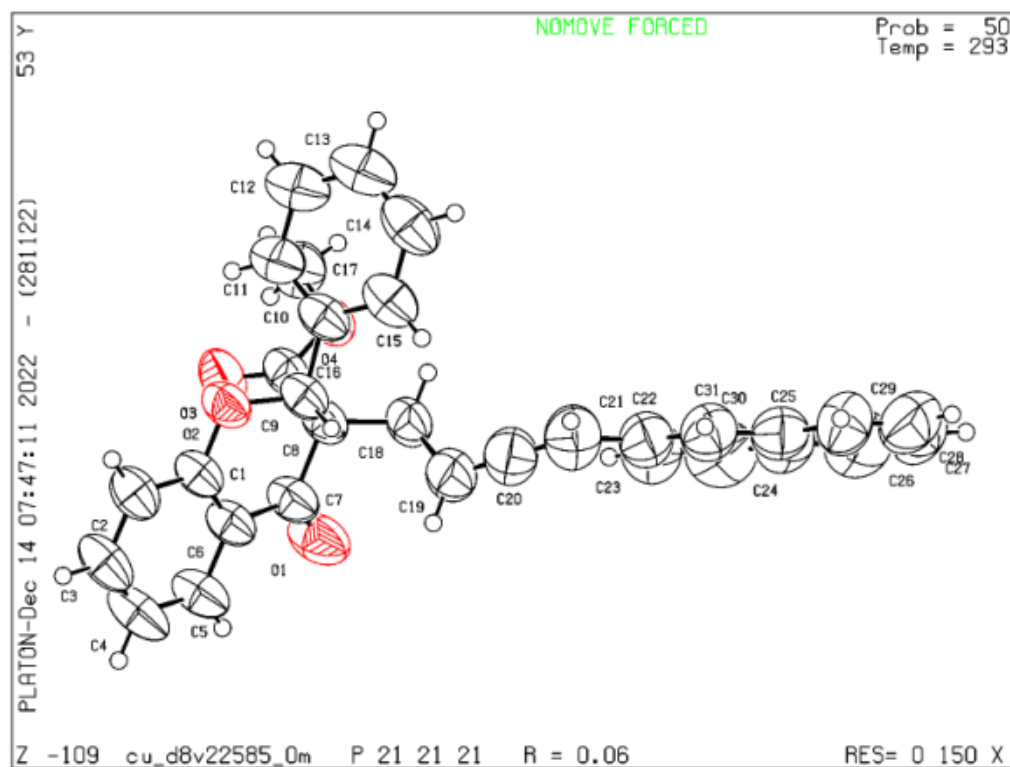

**Crystal Data and Structure Refinement for cu\_d8v22585\_0m for (-)-(2R,3S,R<sub>a</sub>)-3bl**

|                                   |                                             |         |
|-----------------------------------|---------------------------------------------|---------|
| Identification code               | cu_d8v22585_0m                              |         |
| Empirical formula                 | C31 H24 O4                                  |         |
| Formula weight                    | 460.50                                      |         |
| Temperature                       | 293(2) K                                    |         |
| Wavelength                        | 1.54178 Å                                   |         |
| Crystal system                    | Orthorhombic                                |         |
| Space group                       | P 21 21 21                                  |         |
| Unit cell dimensions              | a = 7.6935(2) Å                             | α = 90° |
|                                   | b = 9.7330(2) Å                             | β = 90° |
|                                   | c = 33.1956(6) Å                            | γ = 90° |
| Volume                            | 2485.71(9) Å <sup>3</sup>                   |         |
| Z                                 | 4                                           |         |
| Density (calculated)              | 1.231 Mg/m <sup>3</sup>                     |         |
| Absorption coefficient            | 0.647 mm <sup>-1</sup>                      |         |
| F(000)                            | 968                                         |         |
| Crystal size                      | 0.180 x 0.140 x 0.090 mm <sup>3</sup>       |         |
| Theta range for data collection   | 4.734 to 67.484 °                           |         |
| Index ranges                      | -9<=h<=8, -10<=k<=11, -35<=l<=39            |         |
| Reflections collected             | 15941                                       |         |
| Independent reflections           | 4440 [R(int) = 0.0541]                      |         |
| Completeness to theta = 67.679 °  | 98.9 %                                      |         |
| Absorption correction             | Semi-empirical from equivalents             |         |
| Max. and min. transmission        | 0.7533 and 0.5988                           |         |
| Refinement method                 | Full-matrix least-squares on F <sup>2</sup> |         |
| Data / restraints / parameters    | 4440 / 0 / 318                              |         |
| Goodness-of-fit on F <sup>2</sup> | 1.027                                       |         |
| Final R indices [I>2sigma(I)]     | R1 = 0.0613, wR2 = 0.1705                   |         |
| R indices (all data)              | R1 = 0.0729, wR2 = 0.1899                   |         |
| Absolute structure parameter      | 0.01(16)                                    |         |
| Extinction coefficient            | 0.027(3)                                    |         |
| Largest diff. peak and hole       | 0.189 and -0.178 e.Å <sup>-3</sup>          |         |

## 7. References

1. Liu, L.-X.; Huang, W.-J.; Xie, Q.-X.; Wu, B.; Yu, C.-B.; Zhou, Y.-G. Dynamic Kinetic Resolution of Flavonoids via Asymmetric Allylic Alkylation: Construction of Two Contiguous Stereogenic Centers on Nucleophiles. *ACS Catal.* **2021**, *11*, 12859-12863.
2. Pechalrieu, D.; Dauzonne, D.; Arimond, P. B.; Lopez, M. Synthesis of Novel 3-Halo-3-nitroflavanones and Their Activities as DNA Methyltransferase Inhibitors in Cancer Cells. *Eur. J. Med. Chem.* **2020**, *186*, 111829.
3. Wang, N.; Cai, S.; Zhou, C.; Lu, X.; Wang, Y. One-Pot Synthesis of 2-Aryl-3-alkoxycarbonyl Chromones through a Cascade Lewis Acid-Catalyzed Aldehyde Olefination/Oxa-Michael Addition/Oxidation. *Tetrahedron* **2013**, *69*, 647-652.
4. Saengchantara, S. T.; Wallace, T. W. Conjugate Addition of Cuprate Reagents to Chromones: A Route to 2-Substituted Chroman-4-ones. *Tetrahedron* **1990**, *46*, 3029-3036.
5. Liu, L.-X.; Bai, Y.-Q.; Li, X.; Yu, C.-B.; Zhou, Y.-G. Palladium-Catalyzed Asymmetric Allenylic Alkylation: Construction of Multiple Chiral Thiochromanone Derivatives. *Chem. Sci.* **2023**, *14*, 5477-5482.

## 8. Copy of NMR and HPLC Spectra

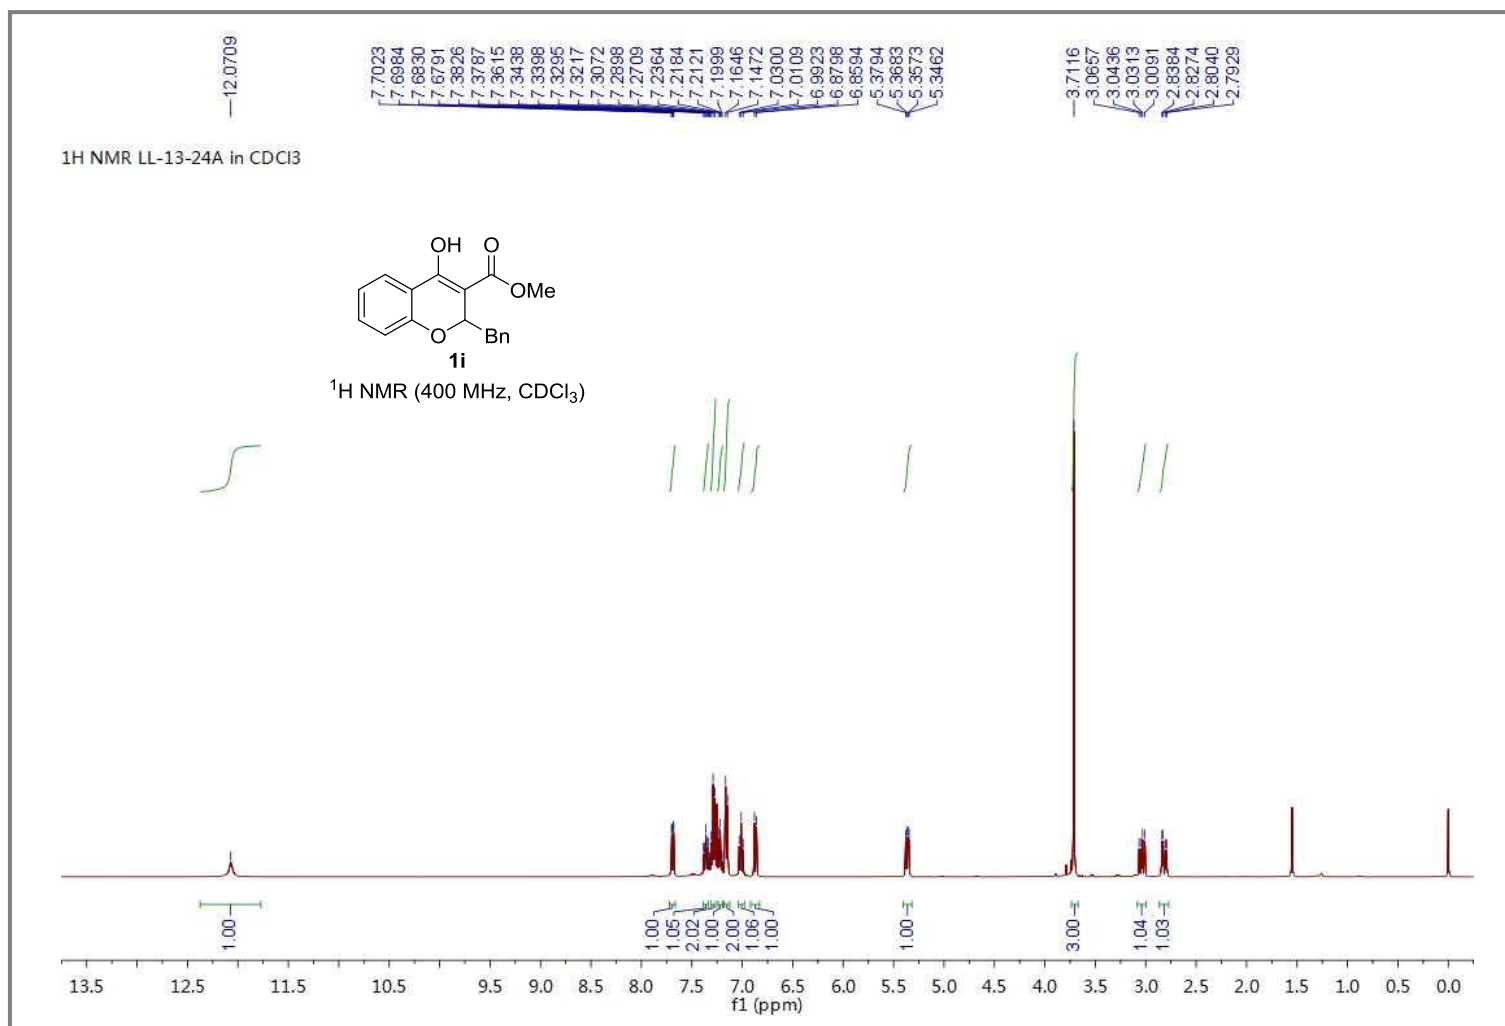

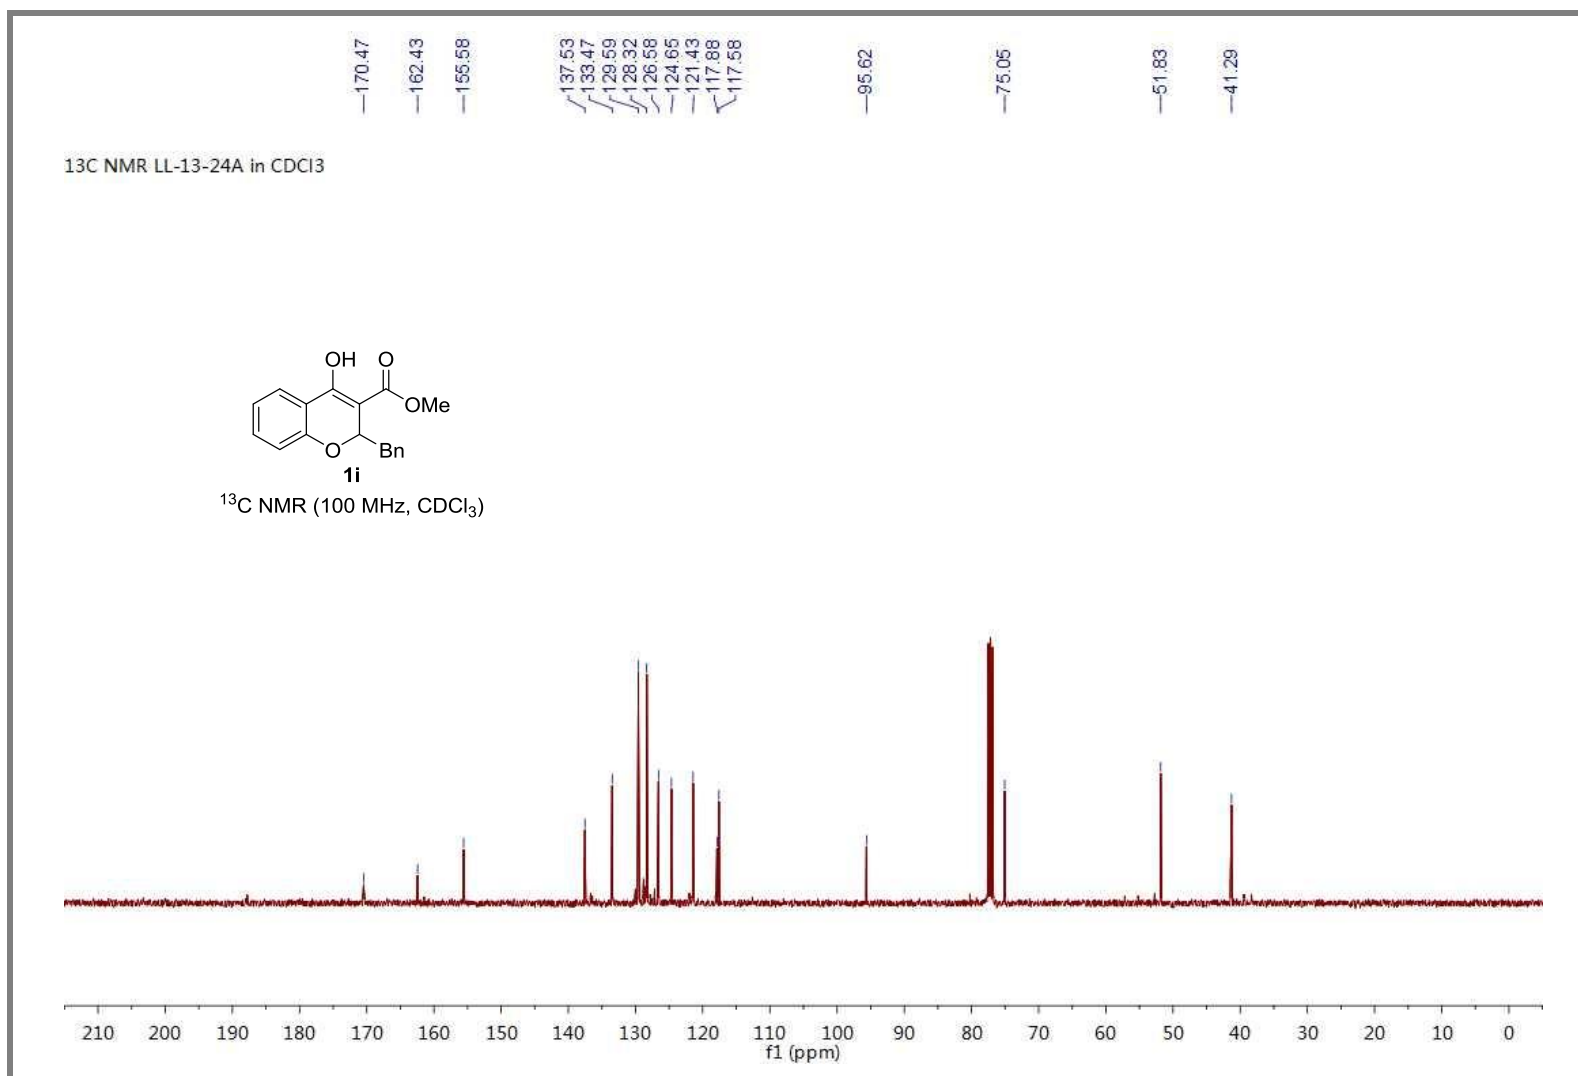

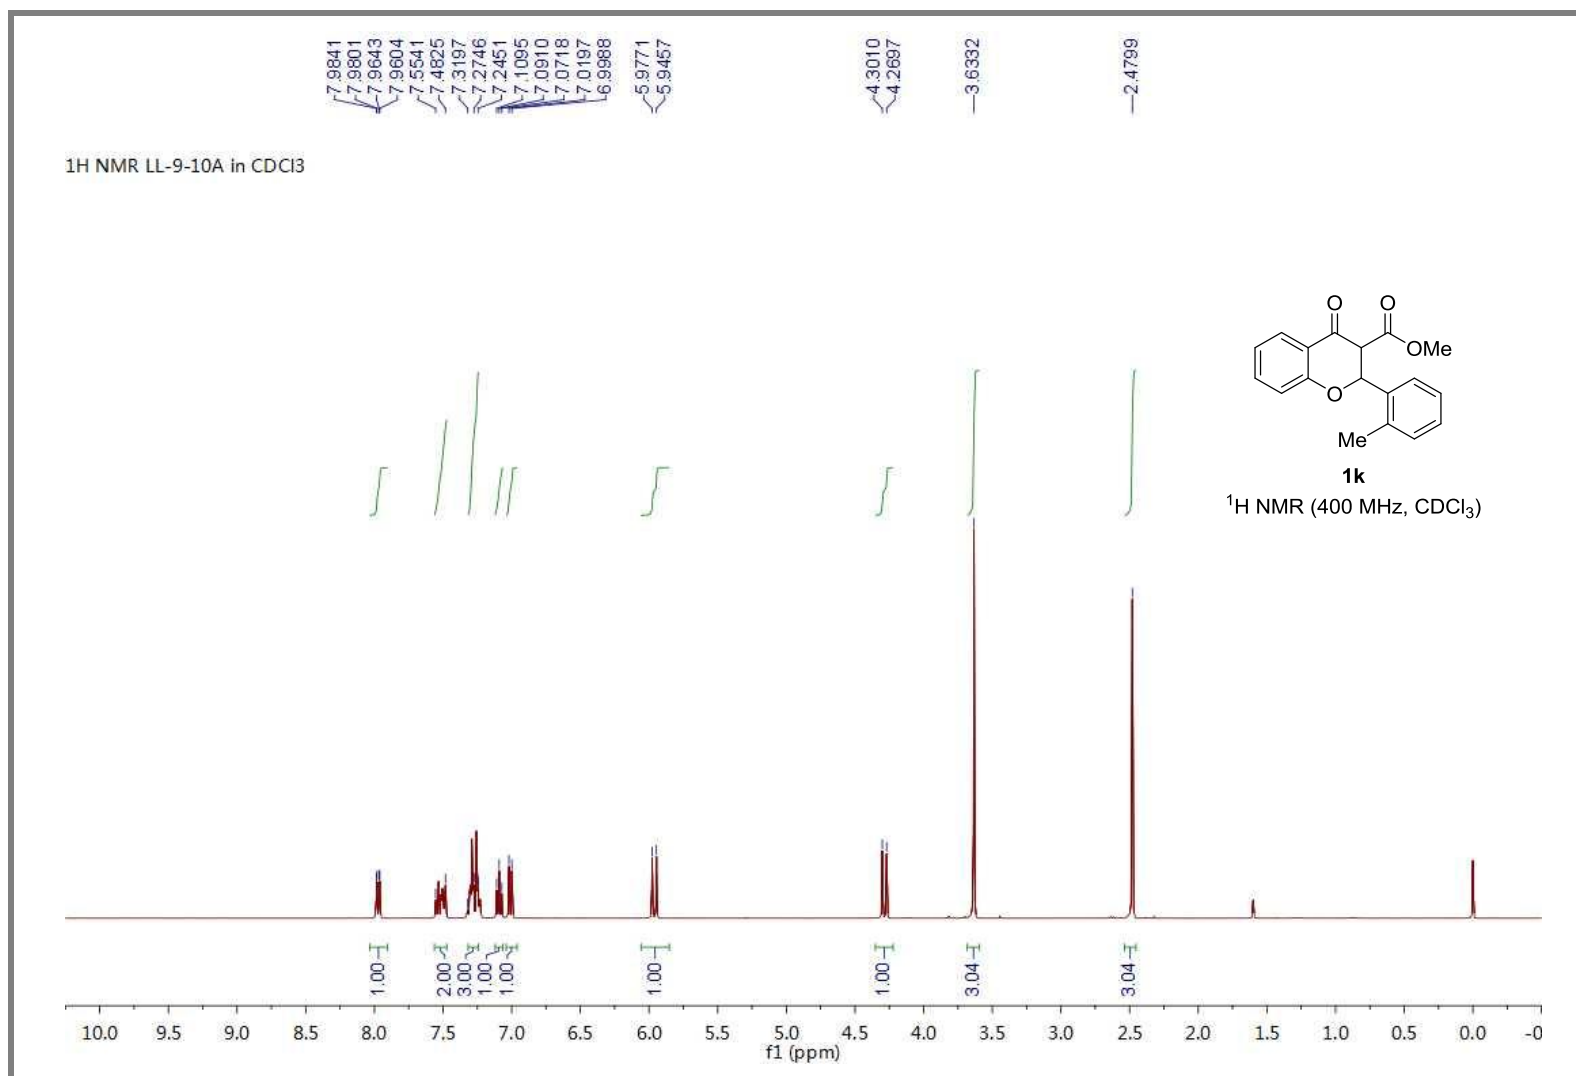

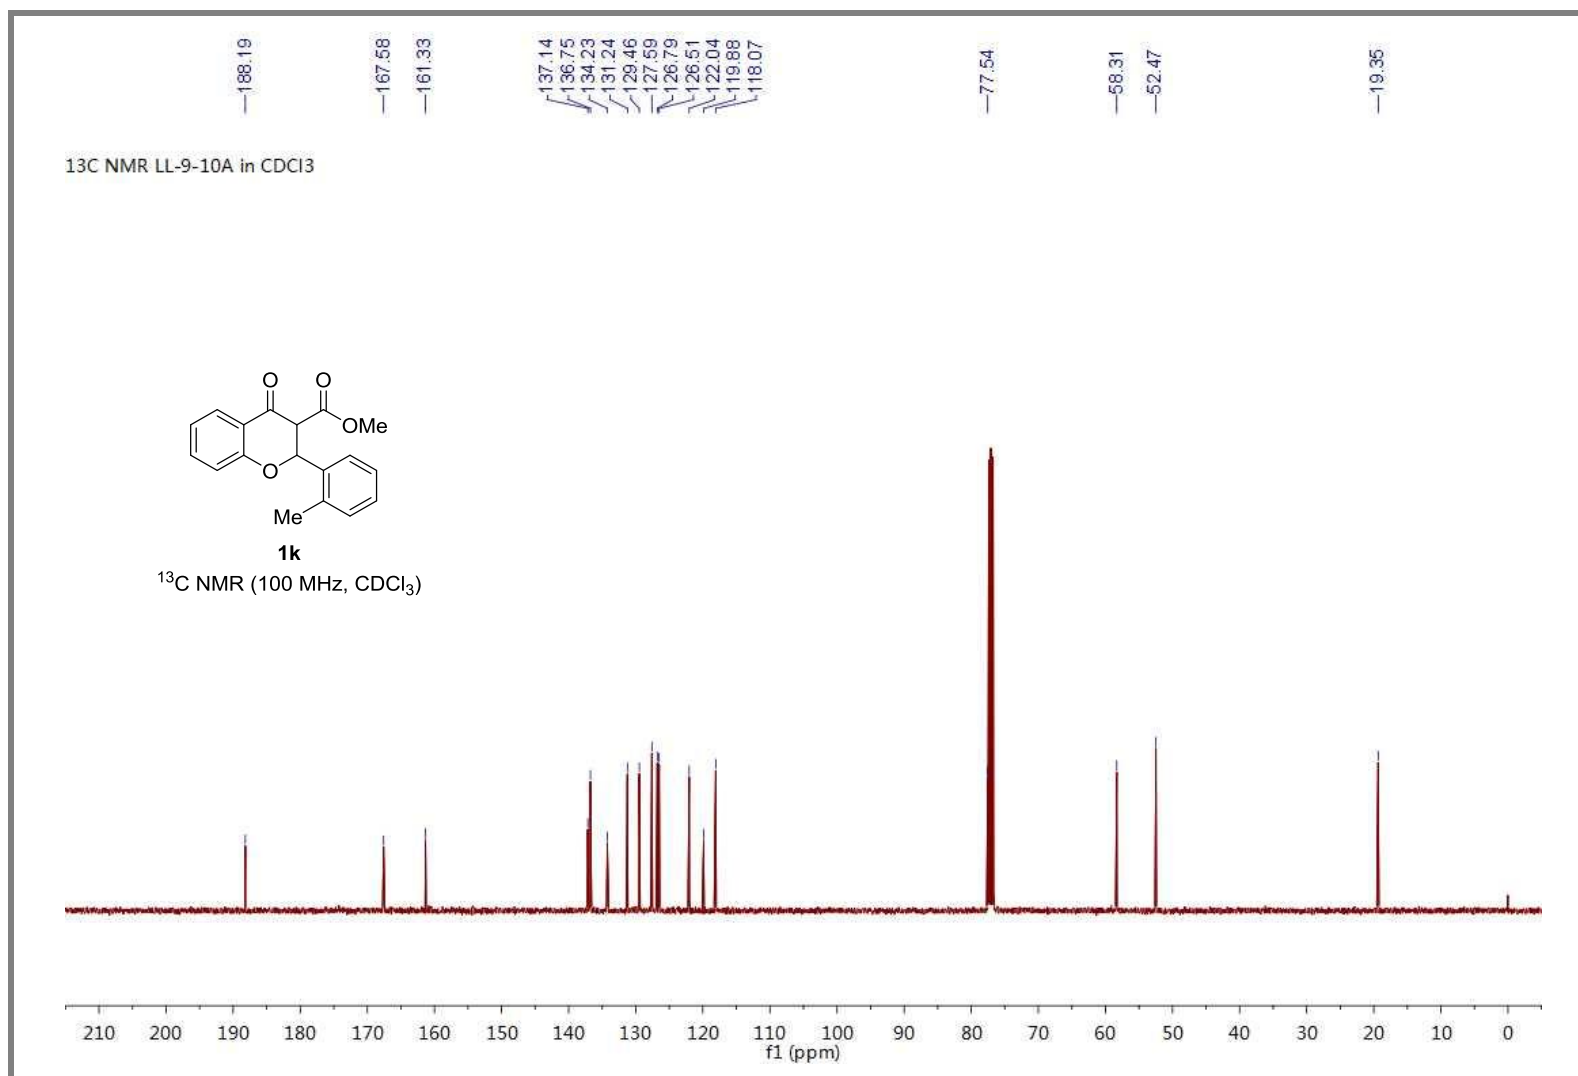



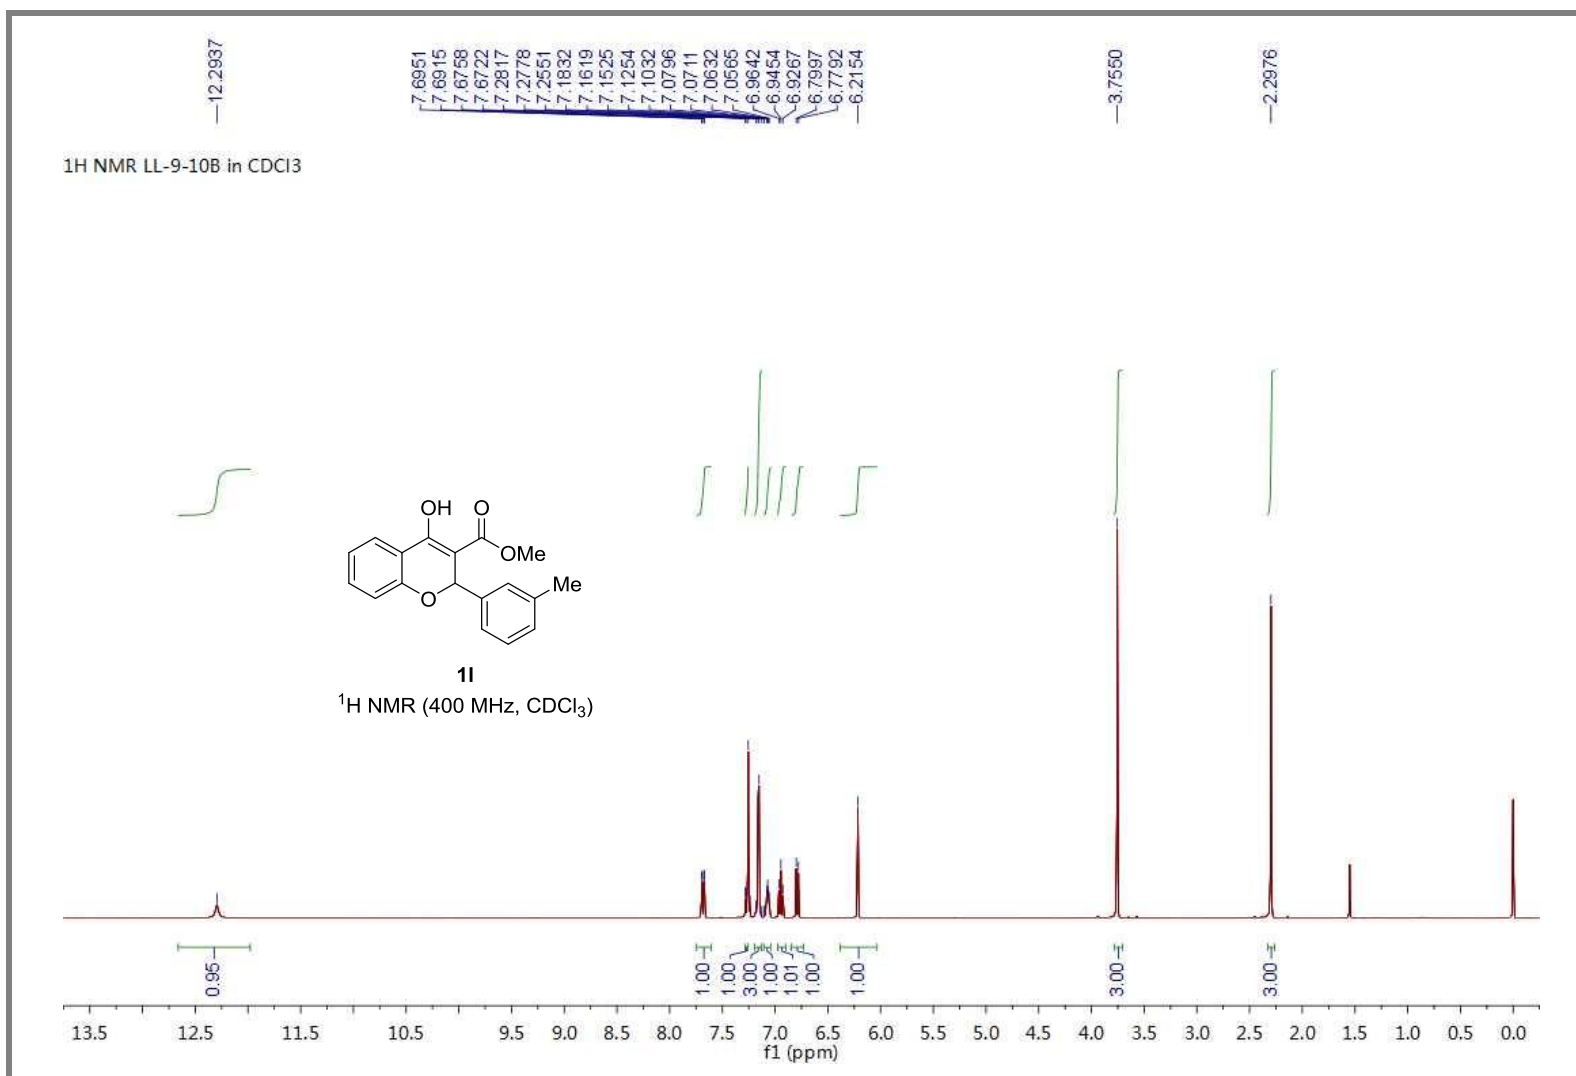

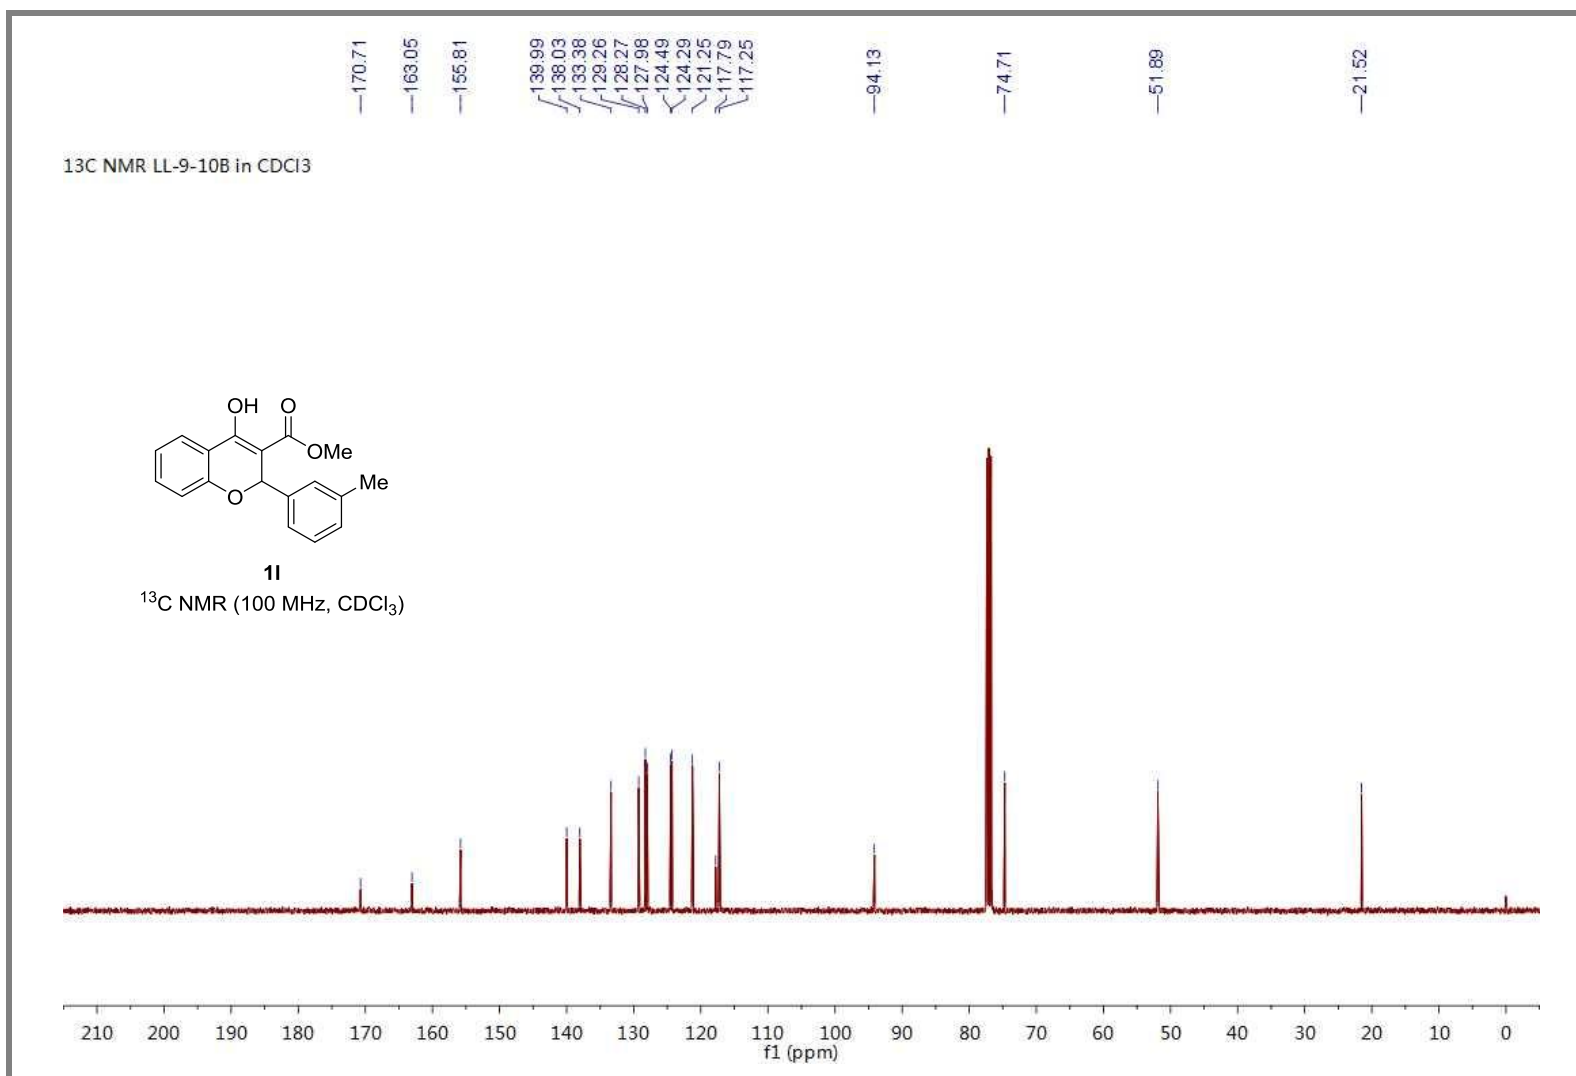

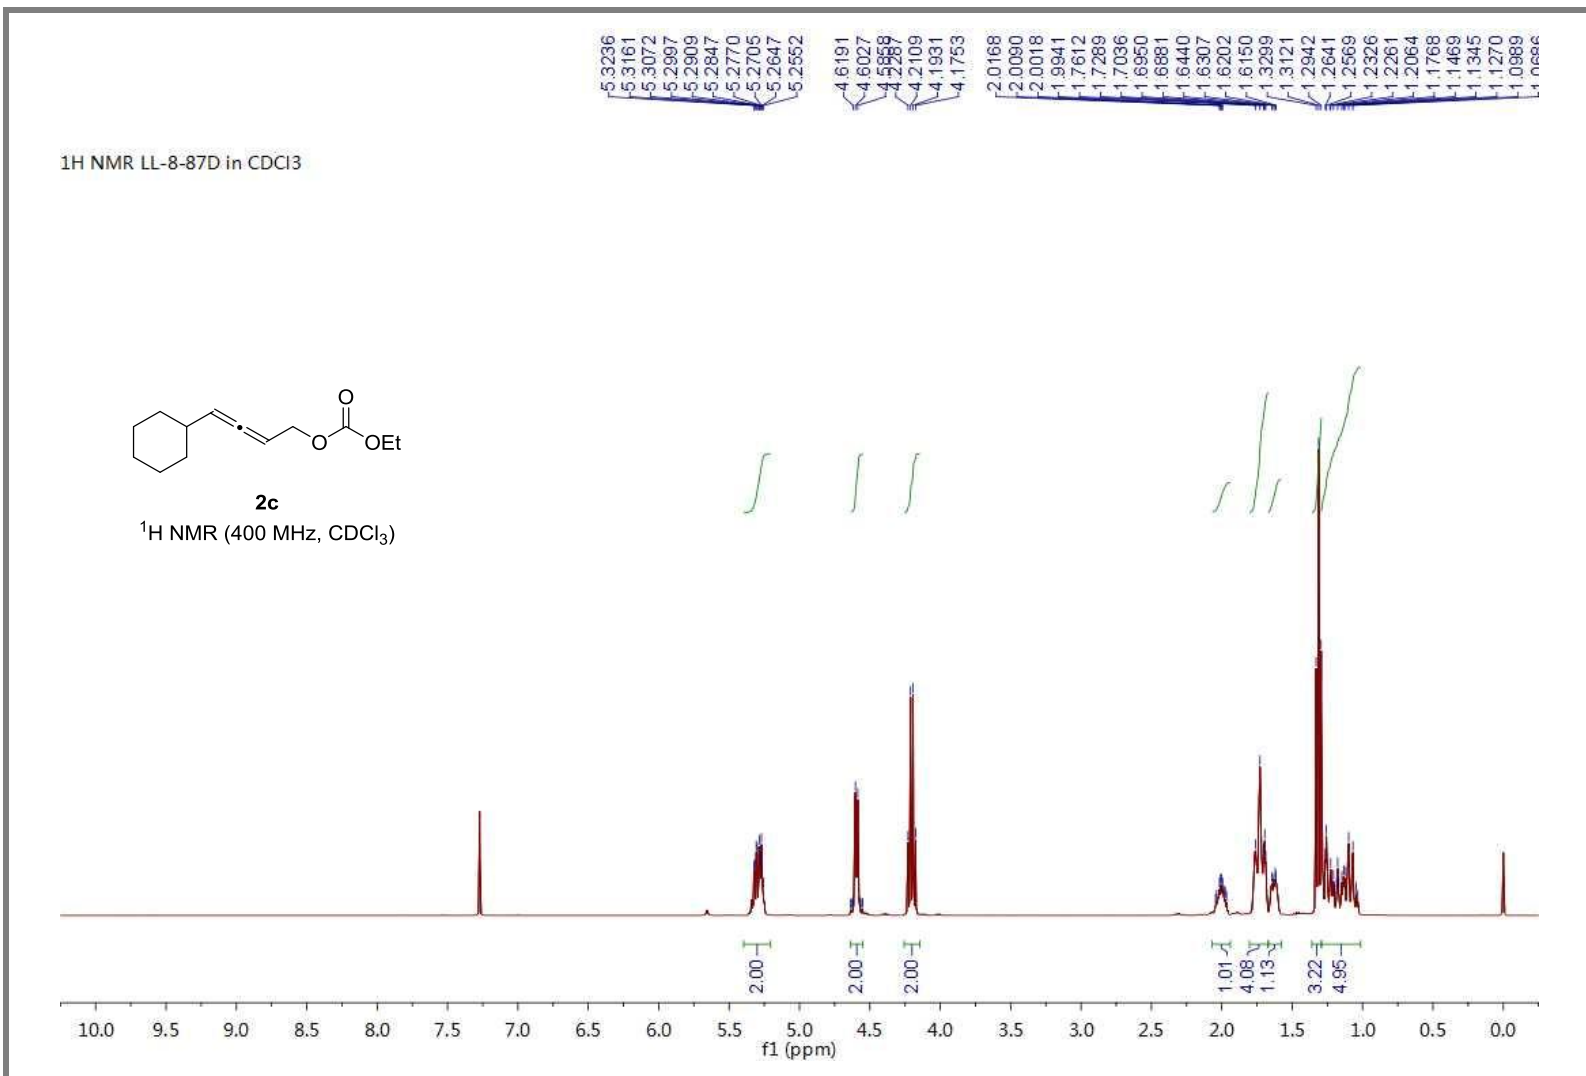

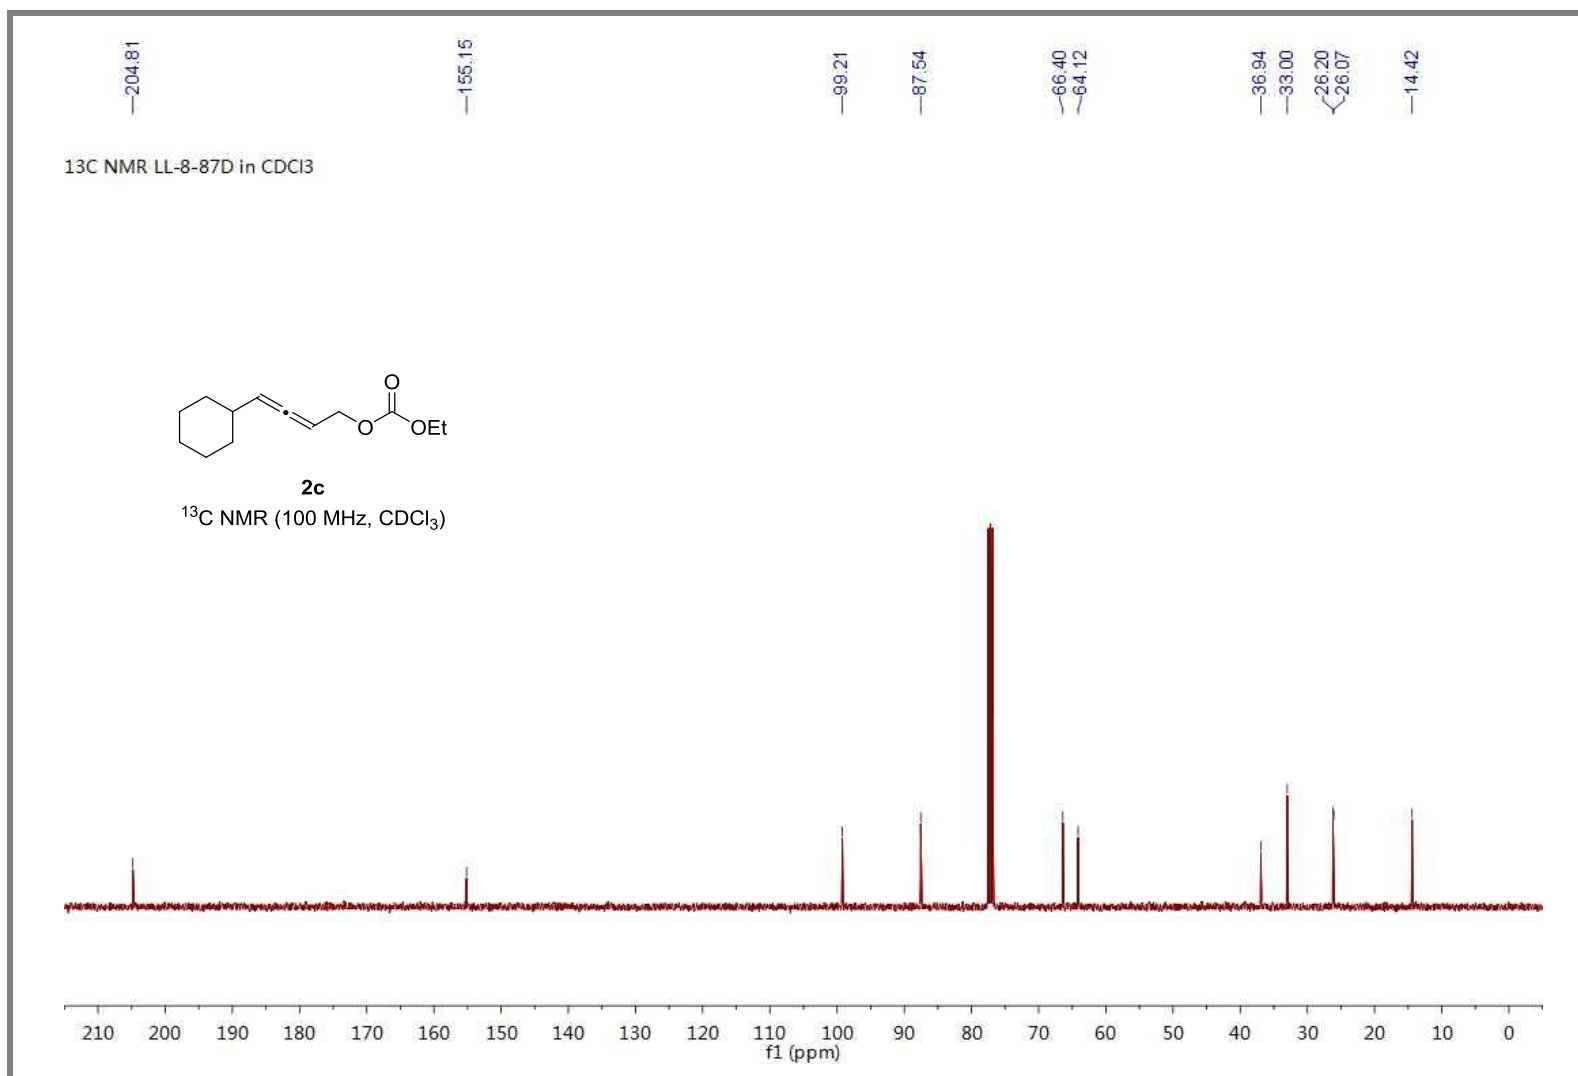

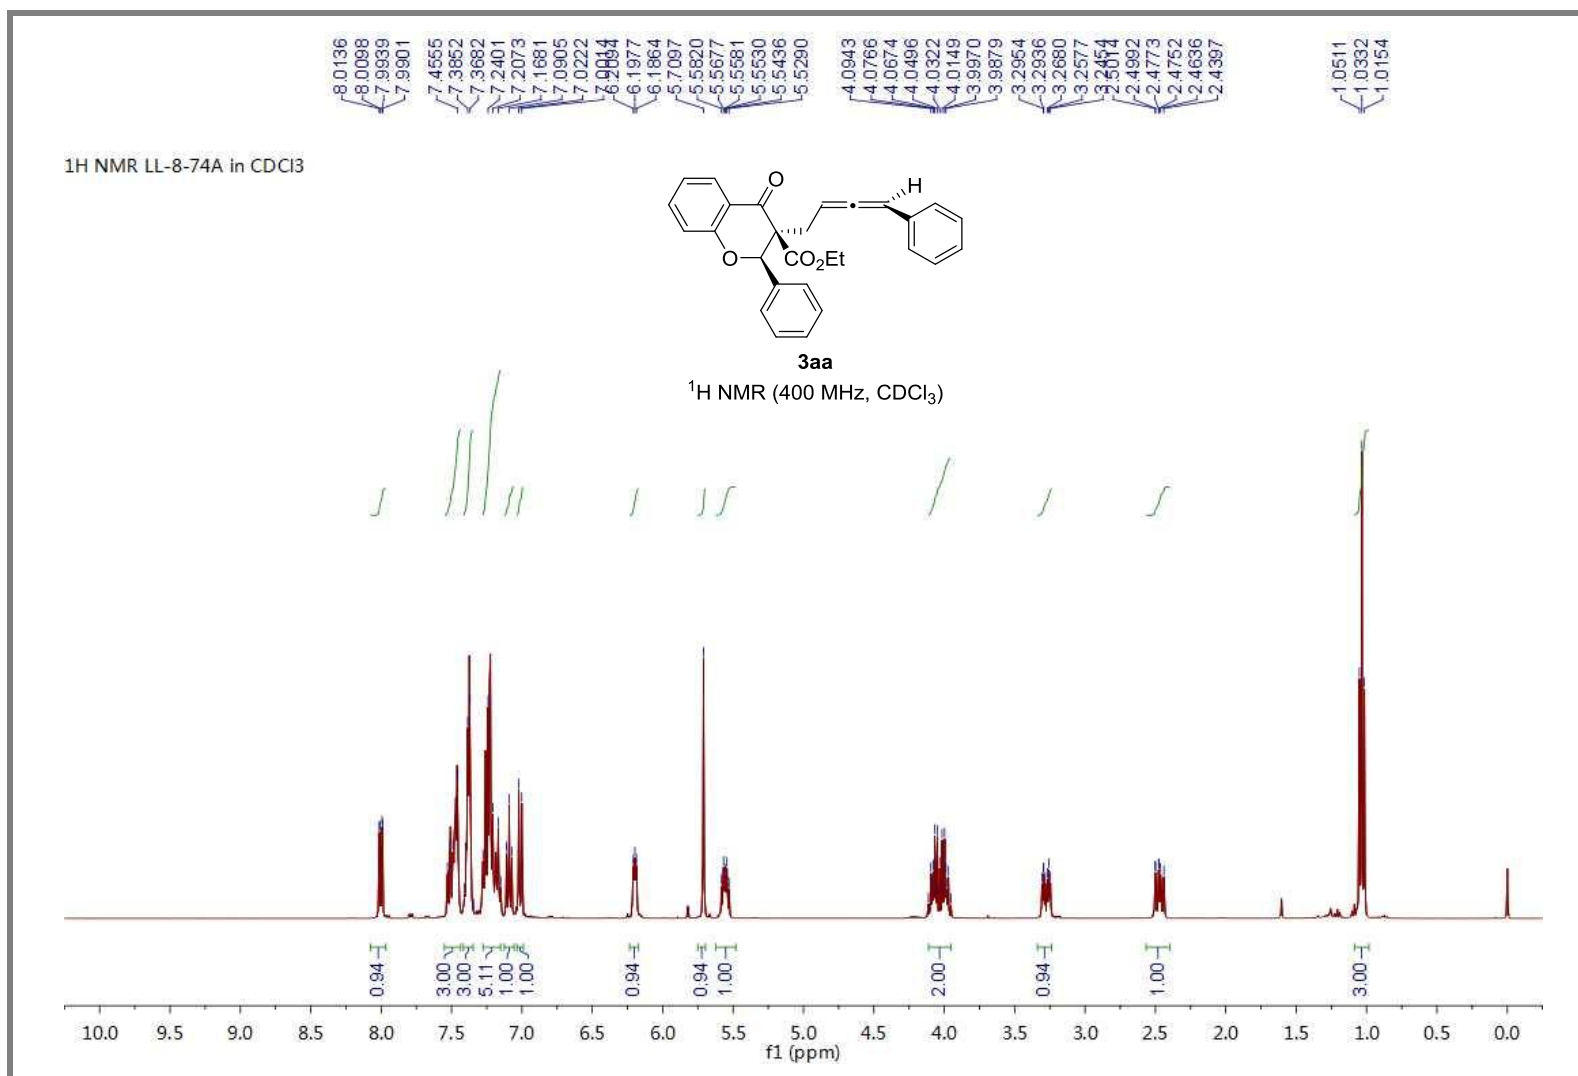

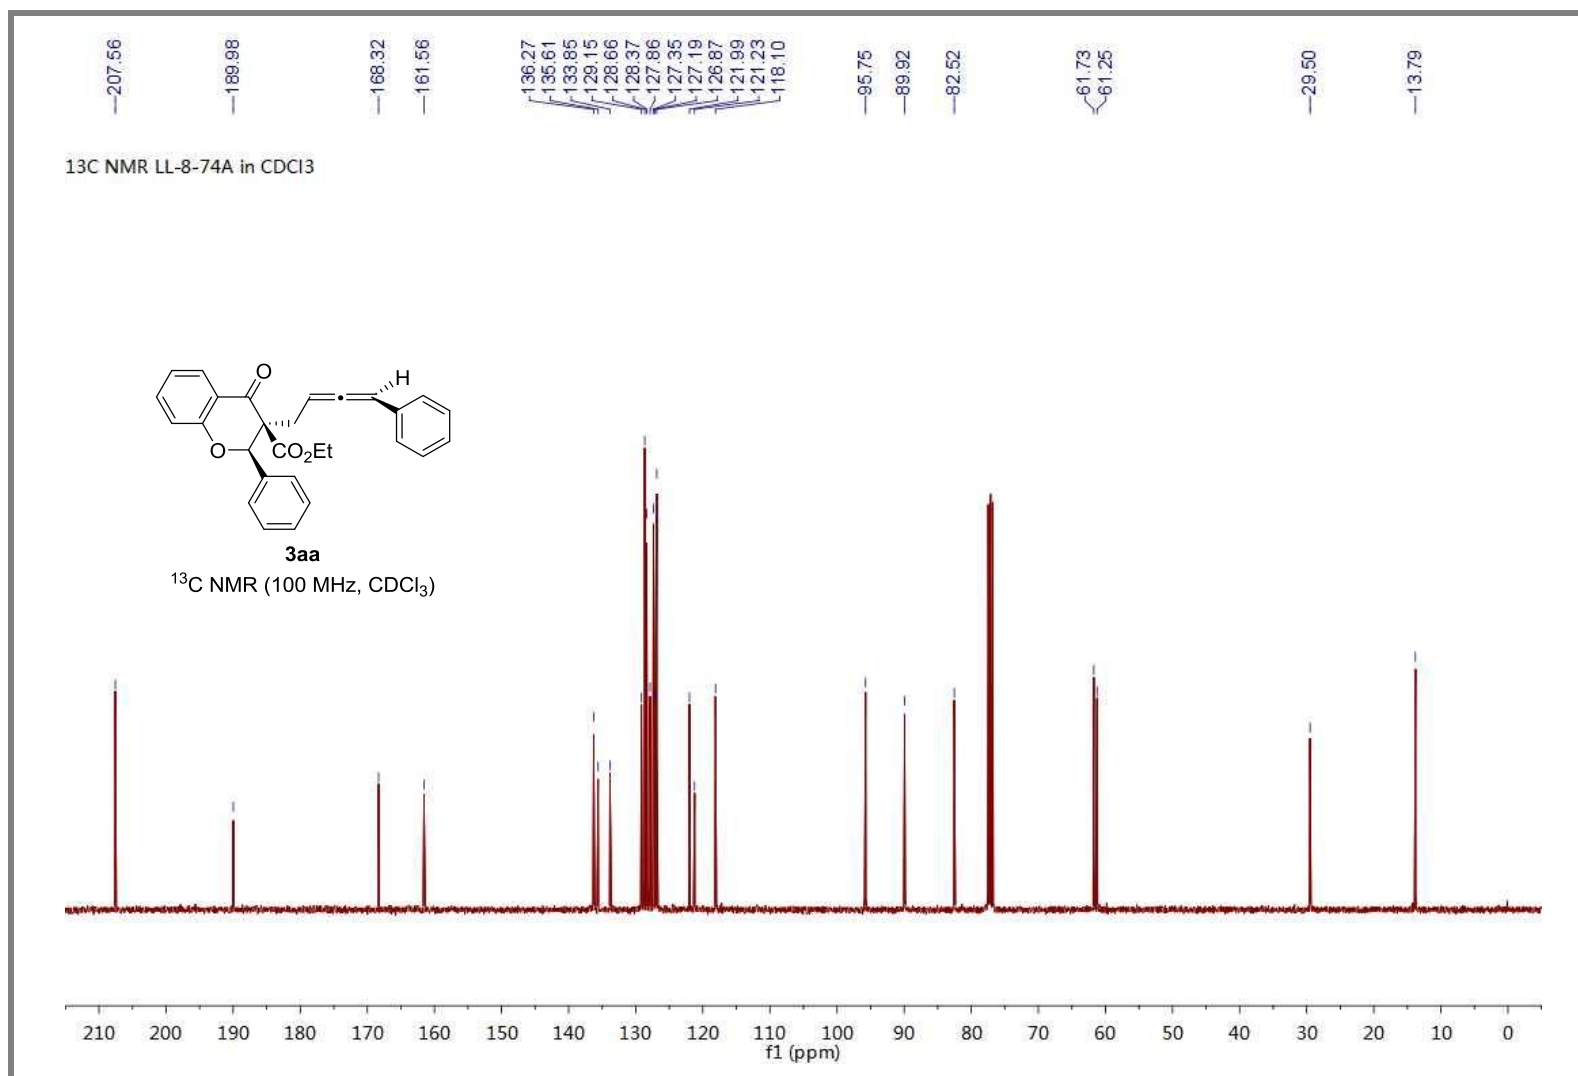

Data File D:\USERS\CHEMSTATION\1\DATA\ZHOU2021\YZ3003875 14-37-35.D  
 Sample Name: LL-8-68 A +/-

=====  
 Acq. Operator : SYSTEM  
 Sample Operator : SYSTEM  
 Acq. Instrument : 1260II Location : -  
 Injection Date : 12/23/2021 2:37:35 PM Inj : 1  
 Inj Volume : No inj  
 Acq. Method : C:\Users\Public\Documents\ChemStation\1\Methods\def\_LC.M  
 Last changed : 12/23/2021 1:26:23 PM by SYSTEM  
 (modified after loading)  
 Analysis Method : C:\Users\Public\Documents\ChemStation\1\Methods\def\_LC.M  
 Last changed : 6/20/2022 3:55:48 PM by SYSTEM  
 (modified after loading)  
 Sample Info : AD-3, n-Hexane/1-PrOH = 98/2, 0.8 mL/min, 30 oC, 254 nm

Additional Info : Peak(s) manually integrated

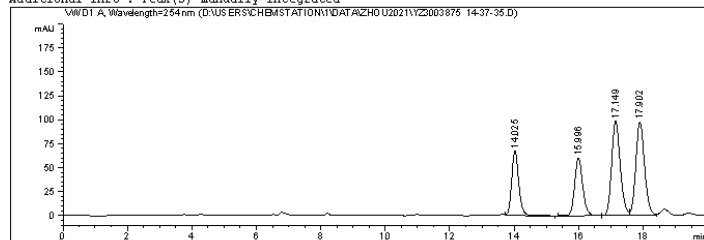

Area Percent Report

Sorted By : Signal  
 Multiplier : 1.0000  
 Dilution : 1.0000  
 Do not use Multiplier & Dilution Factor with ISTDs

Signal 1: VWD1 A, Wavelength=254 nm

| Peak # | RetTime [min] | Type | Width [min] | Area [mAU*s] | Height [mAU] | Area %  |
|--------|---------------|------|-------------|--------------|--------------|---------|
| 1      | 14.025        | VB   | 0.2364      | 1036.10095   | 67.38773     | 18.0571 |
| 2      | 15.996        | BB   | 0.2637      | 1030.33545   | 59.90638     | 17.9566 |
| 3      | 17.149        | BV   | 0.2855      | 1826.95947   | 98.45656     | 31.8401 |
| 4      | 17.902        | VV   | 0.2906      | 1844.52112   | 97.56199     | 32.1462 |

Totals : 5737.91699 323.31266

\*\*\* End of Report \*\*\*

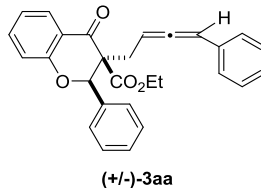

Data File D:\USERS\CHEMSTATION\1\DATA\ZHOU2021\YZ3003934 15-48-51.D  
 Sample Name: LL-8-74A

=====  
 Acq. Operator : SYSTEM  
 Sample Operator : SYSTEM  
 Acq. Instrument : 1260II Location : -  
 Injection Date : 12/31/2021 3:48:51 PM Inj : 1  
 Inj Volume : No inj  
 Acq. Method : C:\Users\Public\Documents\ChemStation\1\Methods\def\_LC.M  
 Last changed : 12/31/2021 2:23:41 PM by SYSTEM  
 (modified after loading)  
 Analysis Method : C:\Users\Public\Documents\ChemStation\1\Methods\def\_LC.M  
 Last changed : 6/20/2022 3:59:48 PM by SYSTEM  
 (modified after loading)  
 Sample Info : AD-3, n-Hexane/1-PrOH = 98/2, 0.8 mL/min, 30 oC, 254 nm

Additional Info : Peak(s) manually integrated

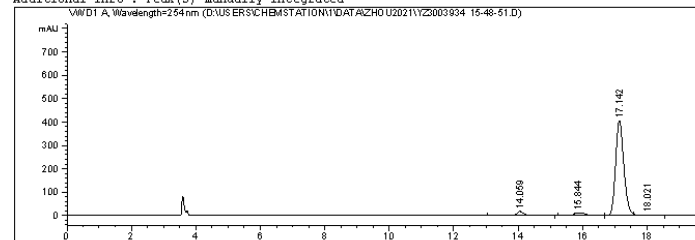

Area Percent Report

Sorted By : Signal  
 Multiplier : 1.0000  
 Dilution : 1.0000  
 Do not use Multiplier & Dilution Factor with ISTDs

Signal 1: VWD1 A, Wavelength=254 nm

| Peak # | RetTime [min] | Type | Width [min] | Area [mAU*s] | Height [mAU] | Area %  |
|--------|---------------|------|-------------|--------------|--------------|---------|
| 1      | 14.059        | BB   | 0.2248      | 254.89165    | 17.31018     | 3.2716  |
| 2      | 15.844        | BB   | 0.3116      | 287.61374    | 12.87648     | 3.6916  |
| 3      | 17.142        | BV R | 0.2726      | 7196.55566   | 406.36435    | 92.3701 |
| 4      | 18.021        | VB E | 0.3007      | 51.94418     | 2.59325      | 0.6667  |

Totals : 7791.00523 439.14426

\*\*\* End of Report \*\*\*

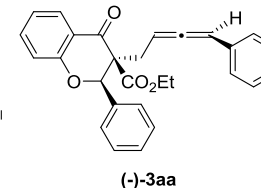

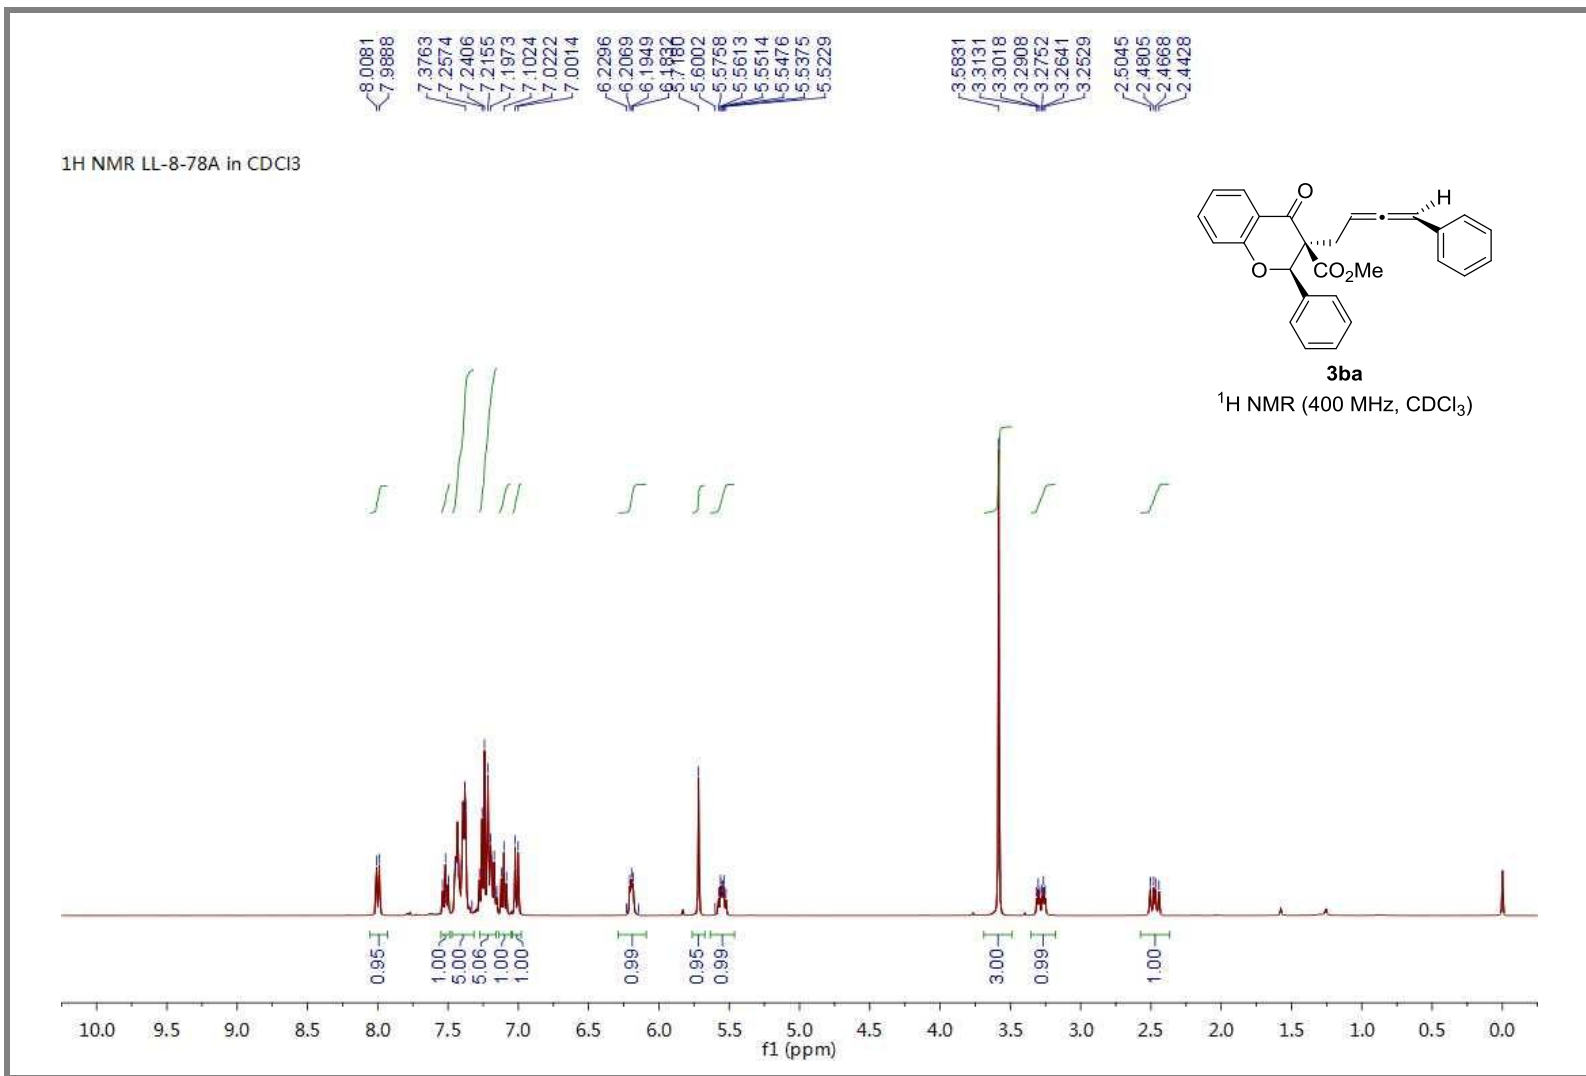



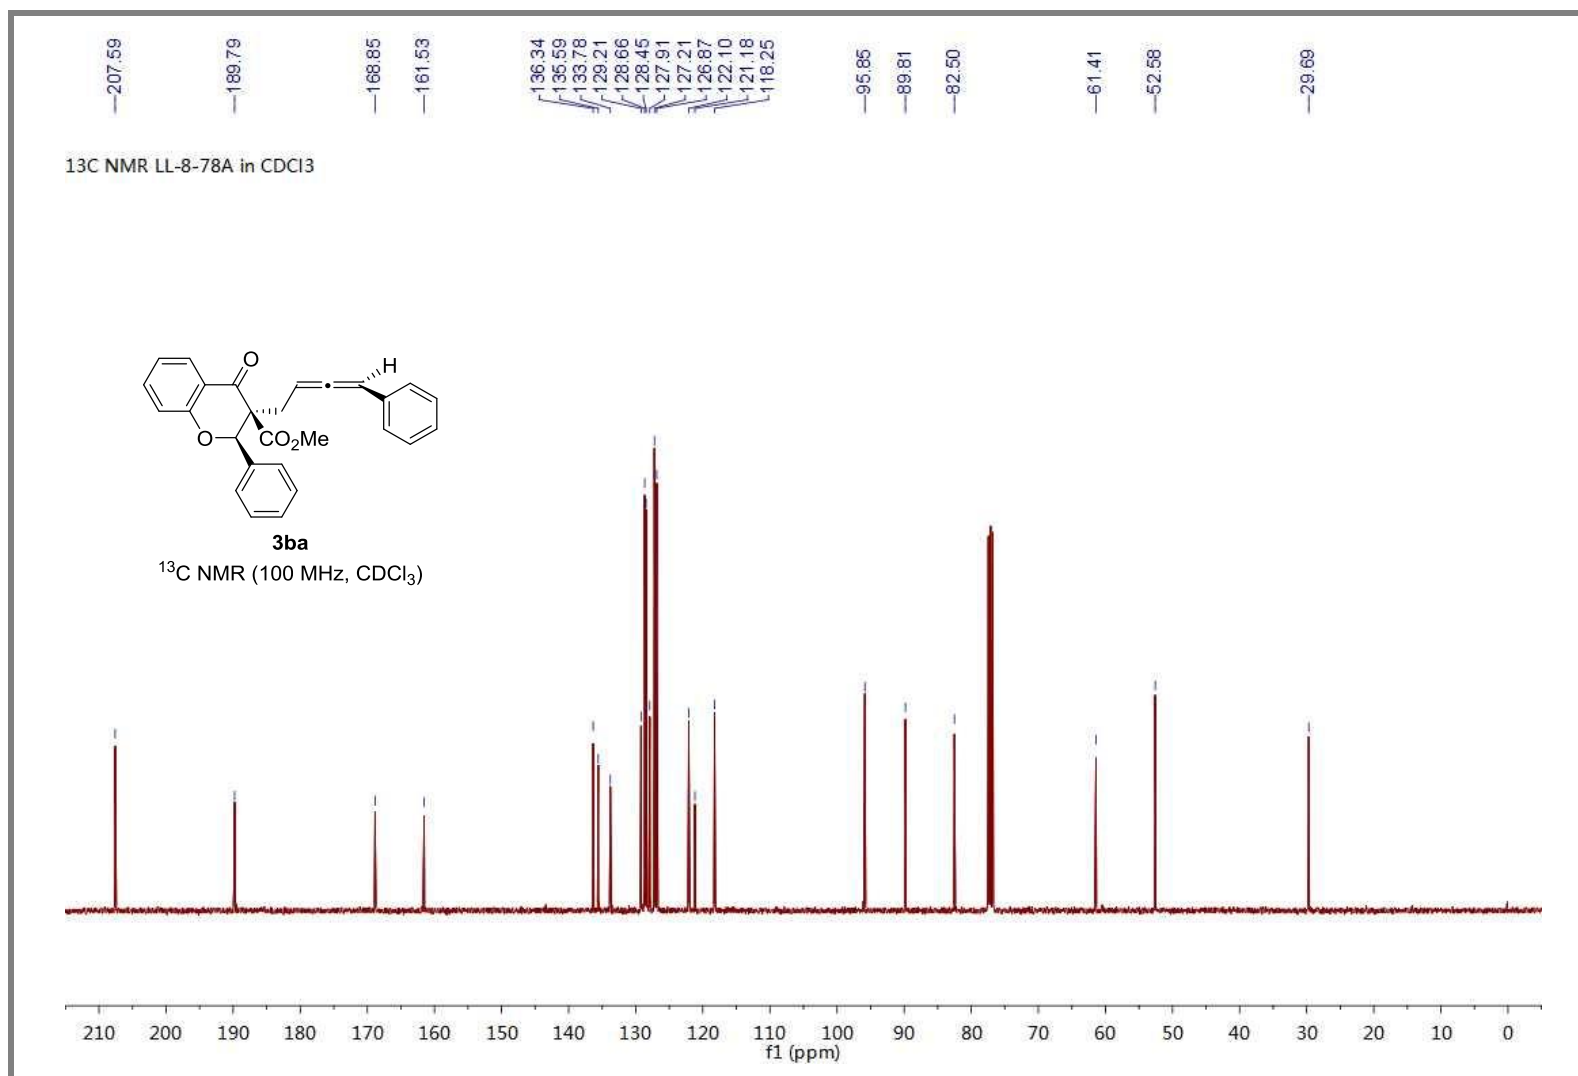

Data File D:\USERS\CHEMSTATION\1\DATA\ZHOU2021\YZ3003877 16-00-51.D  
 Sample Name: LL-8-68 B +/-

=====  
 Acq. Operator : SYSTEM  
 Sample Operator : SYSTEM  
 Acq. Instrument : 1260II Location : -  
 Injection Date : 12/23/2021 4:00:51 PM Inj : 1  
 Inj Volume : No inj  
 Acq. Method : C:\Users\Public\Documents\ChemStation\1\Methods\def\_LC.M  
 Last changed : 12/23/2021 2:58:36 PM by SYSTEM  
 (modified after loading)  
 Analysis Method : C:\Users\Public\Documents\ChemStation\1\Methods\def\_LC.M  
 Last changed : 12/23/2021 4:39:02 PM by SYSTEM  
 (modified after loading)  
 Sample Info : AD-3, n-Hexane/1-PrOH = 97/3, 0.8 mL/min, 30 oC, 254 nm

Additional Info : Peak(s) manually integrated

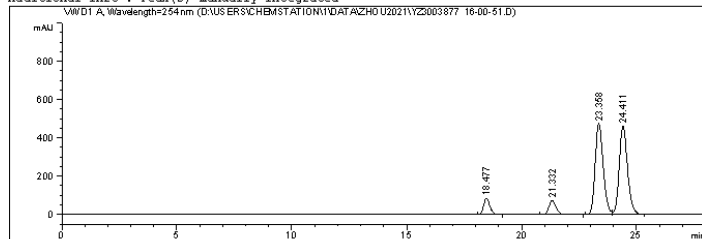

Area Percent Report

Sorted By : Signal  
 Multiplier : 1.0000  
 Dilution : 1.0000  
 Do not use Multiplier & Dilution Factor with ISTDs

Signal 1: VWD1 A, Wavelength=254 nm

| Peak # | RetTime [min] | Type | Width [min] | Area [mAU*s] | Height [mAU] | Area %  |
|--------|---------------|------|-------------|--------------|--------------|---------|
| 1      | 18.477        | BB   | 0.2868      | 1558.24158   | 83.86393     | 5.9223  |
| 2      | 21.332        | BB   | 0.3352      | 1604.02991   | 73.91971     | 6.0964  |
| 3      | 23.358        | BV   | 0.3763      | 1.15468e4    | 473.89447    | 43.8853 |
| 4      | 24.411        | VB   | 0.3865      | 1.16022e4    | 462.79044    | 44.0960 |

Totals : 2.63112e4 1094.46854

\*\*\* End of Report \*\*\*

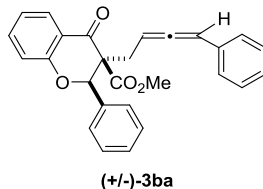

Data File D:\USERS\CHEMSTATION\1\DATA\ZHOU2022\YZ3003977 15-18-00.D  
 Sample Name: LL-8-78A

=====  
 Acq. Operator : SYSTEM  
 Sample Operator : SYSTEM  
 Acq. Instrument : 1260II Location : -  
 Injection Date : 1/7/2022 3:18:00 PM Inj : 1  
 Inj Volume : No inj  
 Acq. Method : C:\Users\Public\Documents\ChemStation\1\Methods\def\_LC.M  
 Last changed : 1/7/2022 1:40:20 PM by SYSTEM  
 (modified after loading)  
 Analysis Method : C:\Users\Public\Documents\ChemStation\1\Methods\def\_LC.M  
 Last changed : 6/14/2022 8:29:40 PM by SYSTEM  
 (modified after loading)  
 Sample Info : AD-3, n-Hexane/1-PrOH = 97/3, 0.8 mL/min, 30 oC, 254 nm

Additional Info : Peak(s) manually integrated

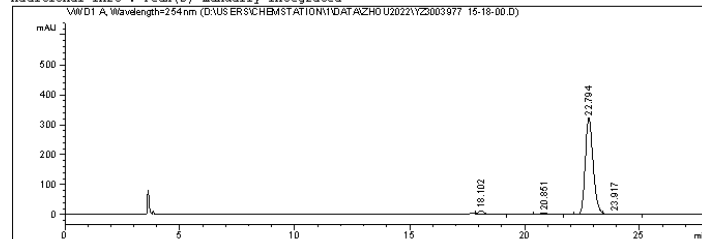

Area Percent Report

Sorted By : Signal  
 Multiplier : 1.0000  
 Dilution : 1.0000  
 Do not use Multiplier & Dilution Factor with ISTDs

Signal 1: VWD1 A, Wavelength=254 nm

| Peak # | RetTime [min] | Type | Width [min] | Area [mAU*s] | Height [mAU] | Area %  |
|--------|---------------|------|-------------|--------------|--------------|---------|
| 1      | 18.102        | VB   | 0.2912      | 246.32407    | 12.76291     | 3.0138  |
| 2      | 20.851        | BB   | 0.3255      | 129.07010    | 6.10963      | 1.5792  |
| 3      | 22.794        | BV R | 0.3678      | 7730.21631   | 322.29019    | 94.5791 |
| 4      | 23.917        | VB E | 0.4038      | 67.67116     | 2.46122      | 0.8280  |

Totals : 8173.28163 343.62395

\*\*\* End of Report \*\*\*

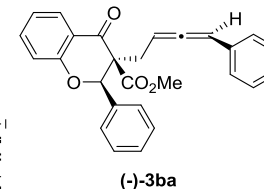

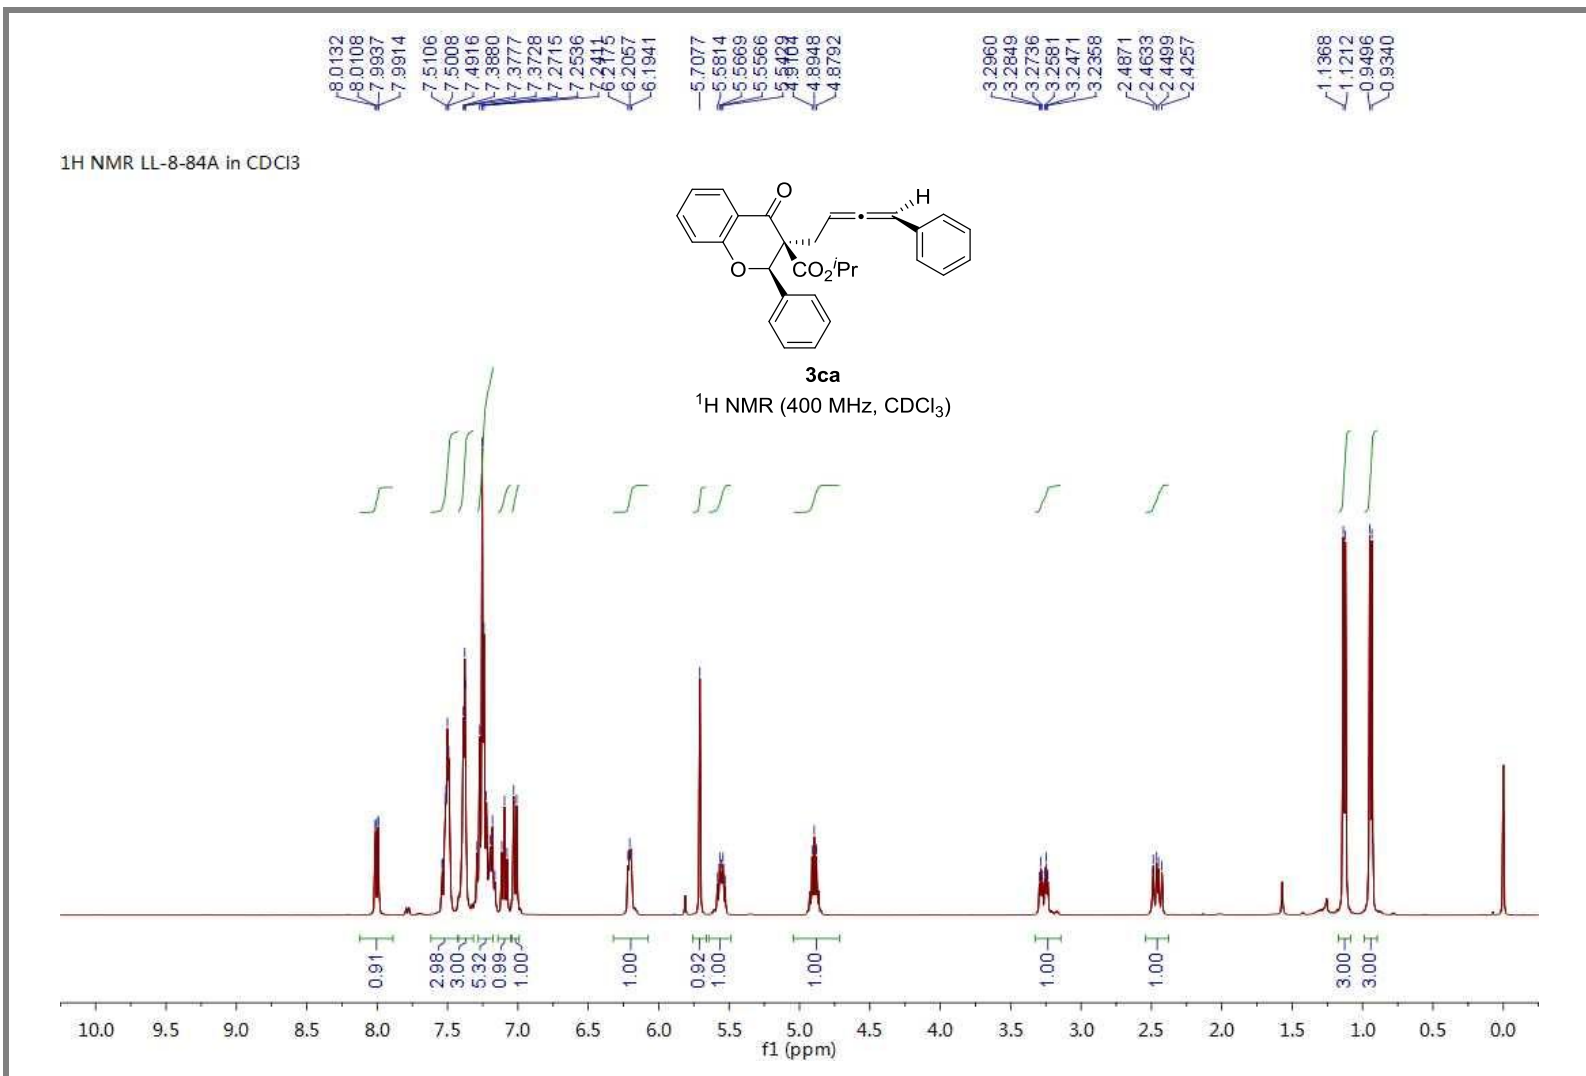

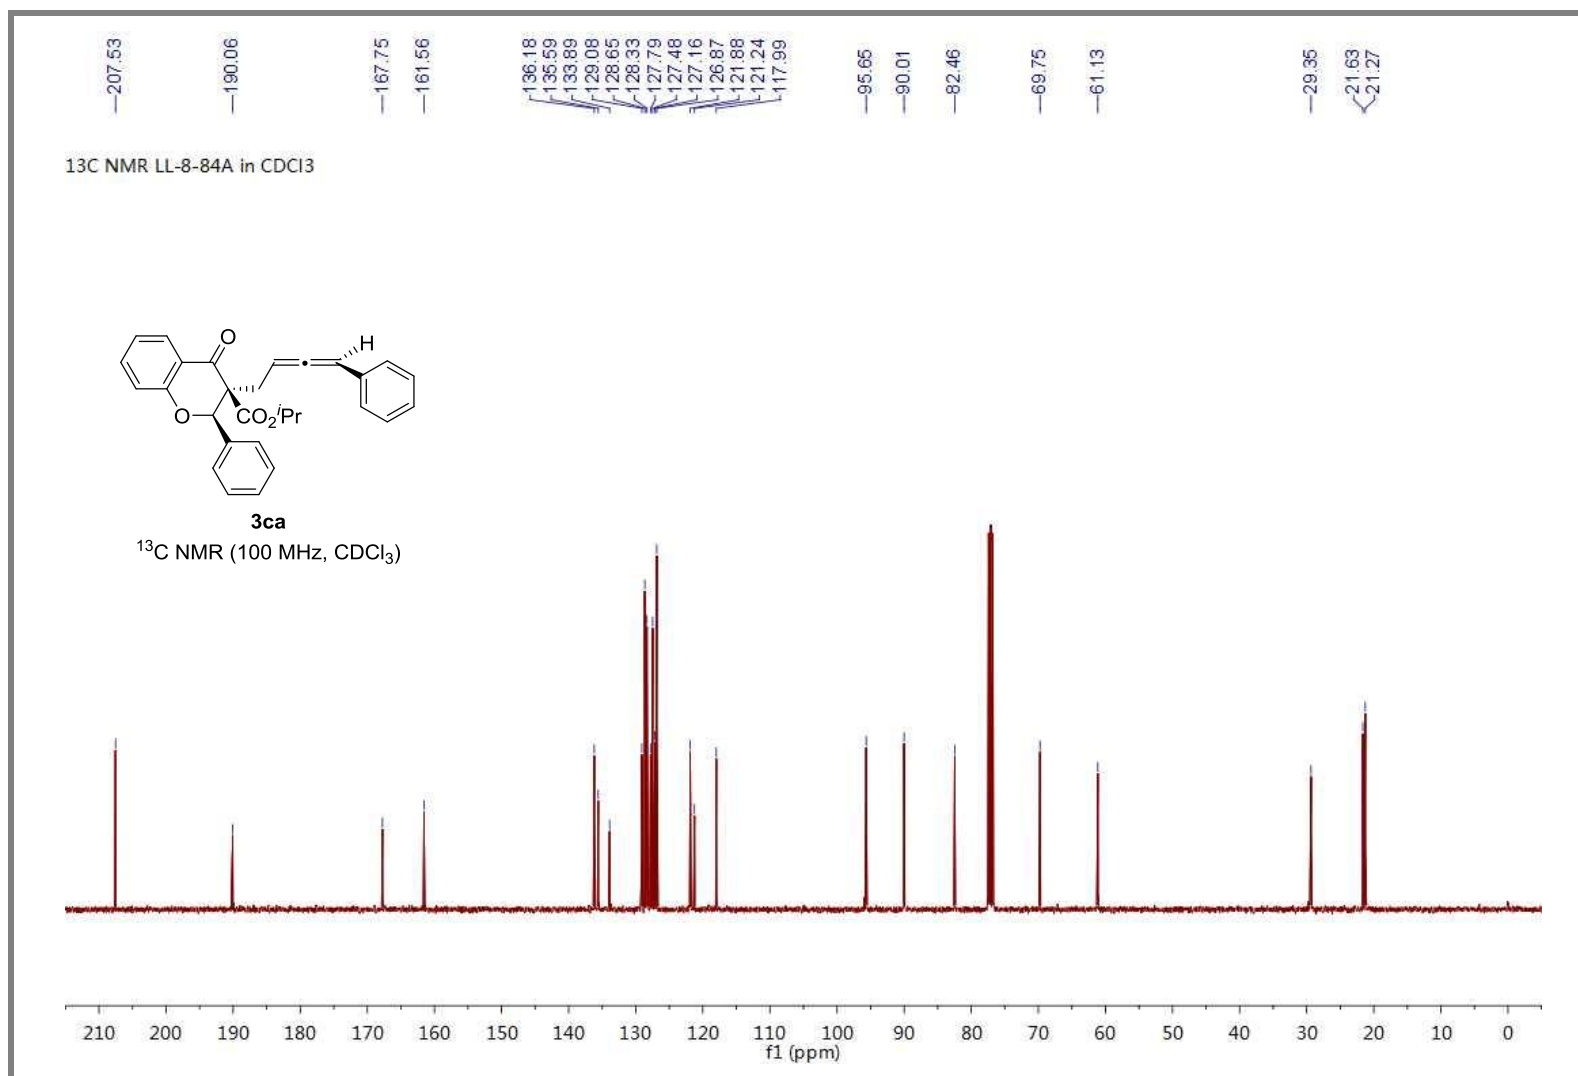

Data File D:\USERS\CHEMSTATION\1\DATA\ZHOU2021\YZ3003880 18-33-14.D  
 Sample Name: LL-8-68 C +/- 3

=====  
 Acq. Operator : SYSTEM  
 Sample Operator : SYSTEM  
 Acq. Instrument : 1260II Location : -  
 Injection Date : 12/23/2021 6:33:14 PM Inj : 1  
 Inj Volume : No inj  
 Acq. Method : C:\Users\Public\Documents\ChemStation\1\Methods\def\_LC.M  
 Last changed : 12/23/2021 6:16:06 PM by SYSTEM  
 (modified after loading)  
 Analysis Method : C:\Users\Public\Documents\ChemStation\1\Methods\def\_LC.M  
 Last changed : 12/23/2021 6:52:15 PM by SYSTEM  
 (modified after loading)  
 Sample Info : OD-3, n-Hexane/1-PrOH = 97/3, 0.8 mL/min, 30 oC, 254 nm

Additional Info : Peak(s) manually integrated

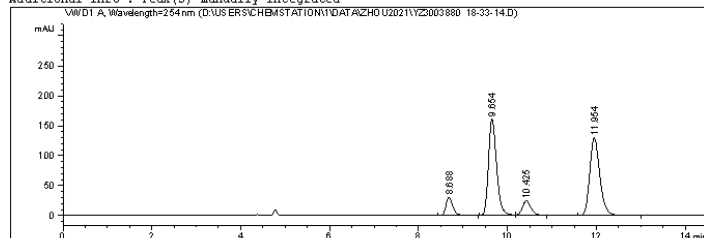

=====  
 Area Percent Report  
 =====

Sorted By : Signal  
 Multiplier : 1.0000  
 Dilution : 1.0000  
 Do not use Multiplier & Dilution Factor with ISTDs

Signal 1: VWD1 A, Wavelength=254 nm

| Peak # | RetTime [min] | Type | Width [min] | Area [mAU*s] | Height [mAU] | Area %  |
|--------|---------------|------|-------------|--------------|--------------|---------|
| 1      | 8.688         | BB   | 0.1692      | 337.20175    | 30.45543     | 7.0671  |
| 2      | 9.654         | VB   | 0.1970      | 2054.58472   | 160.89732    | 43.0600 |
| 3      | 10.425        | VB   | 0.2101      | 331.29941    | 24.14574     | 6.9434  |
| 4      | 11.954        | BB   | 0.2447      | 2048.35547   | 129.37819    | 42.9295 |

Totals : 4771.44135 344.87668

=====  
 \*\*\* End of Report \*\*\*

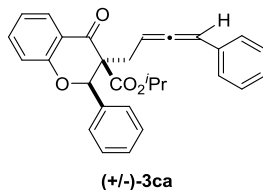

Data File D:\USERS\CHEMSTATION\1\DATA\ZHOU2022\YZ3004004 15-45-16.D  
 Sample Name: LL-8--84A

=====  
 Acq. Operator : SYSTEM  
 Sample Operator : SYSTEM  
 Acq. Instrument : 1260II Location : -  
 Injection Date : 1/14/2022 3:45:16 PM Inj : 1  
 Inj Volume : No inj  
 Acq. Method : C:\Users\Public\Documents\ChemStation\1\Methods\def\_LC.M  
 Last changed : 1/14/2022 3:00:41 PM by SYSTEM  
 (modified after loading)  
 Analysis Method : C:\Users\Public\Documents\ChemStation\1\Methods\def\_LC.M  
 Last changed : 6/14/2022 8:33:33 PM by SYSTEM  
 (modified after loading)  
 Sample Info : OD-3, n-Hexane/1-PrOH = 97/3, 0.8 mL/min, 30 oC, 254 nm

Additional Info : Peak(s) manually integrated

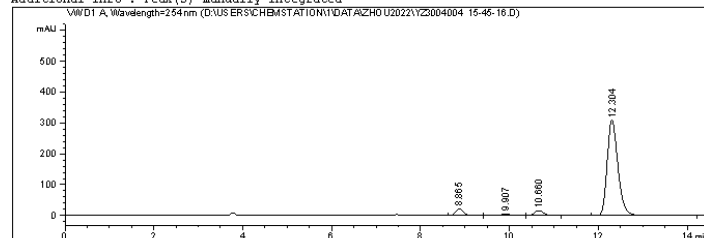

=====  
 Area Percent Report  
 =====

Sorted By : Signal  
 Multiplier : 1.0000  
 Dilution : 1.0000  
 Do not use Multiplier & Dilution Factor with ISTDs

Signal 1: VWD1 A, Wavelength=254 nm

| Peak # | RetTime [min] | Type | Width [min] | Area [mAU*s] | Height [mAU] | Area %  |
|--------|---------------|------|-------------|--------------|--------------|---------|
| 1      | 8.865         | BB   | 0.1820      | 262.53870    | 22.04147     | 4.5513  |
| 2      | 9.907         | VB R | 0.2183      | 71.21669     | 4.93606      | 1.2346  |
| 3      | 10.660        | BB   | 0.2204      | 228.42139    | 16.01500     | 3.9598  |
| 4      | 12.304        | BB   | 0.2589      | 5206.26318   | 308.55396    | 90.2543 |

Totals : 5768.43996 351.54649

=====  
 \*\*\* End of Report \*\*\*

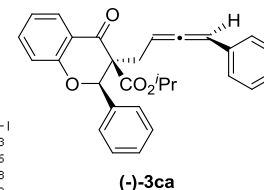

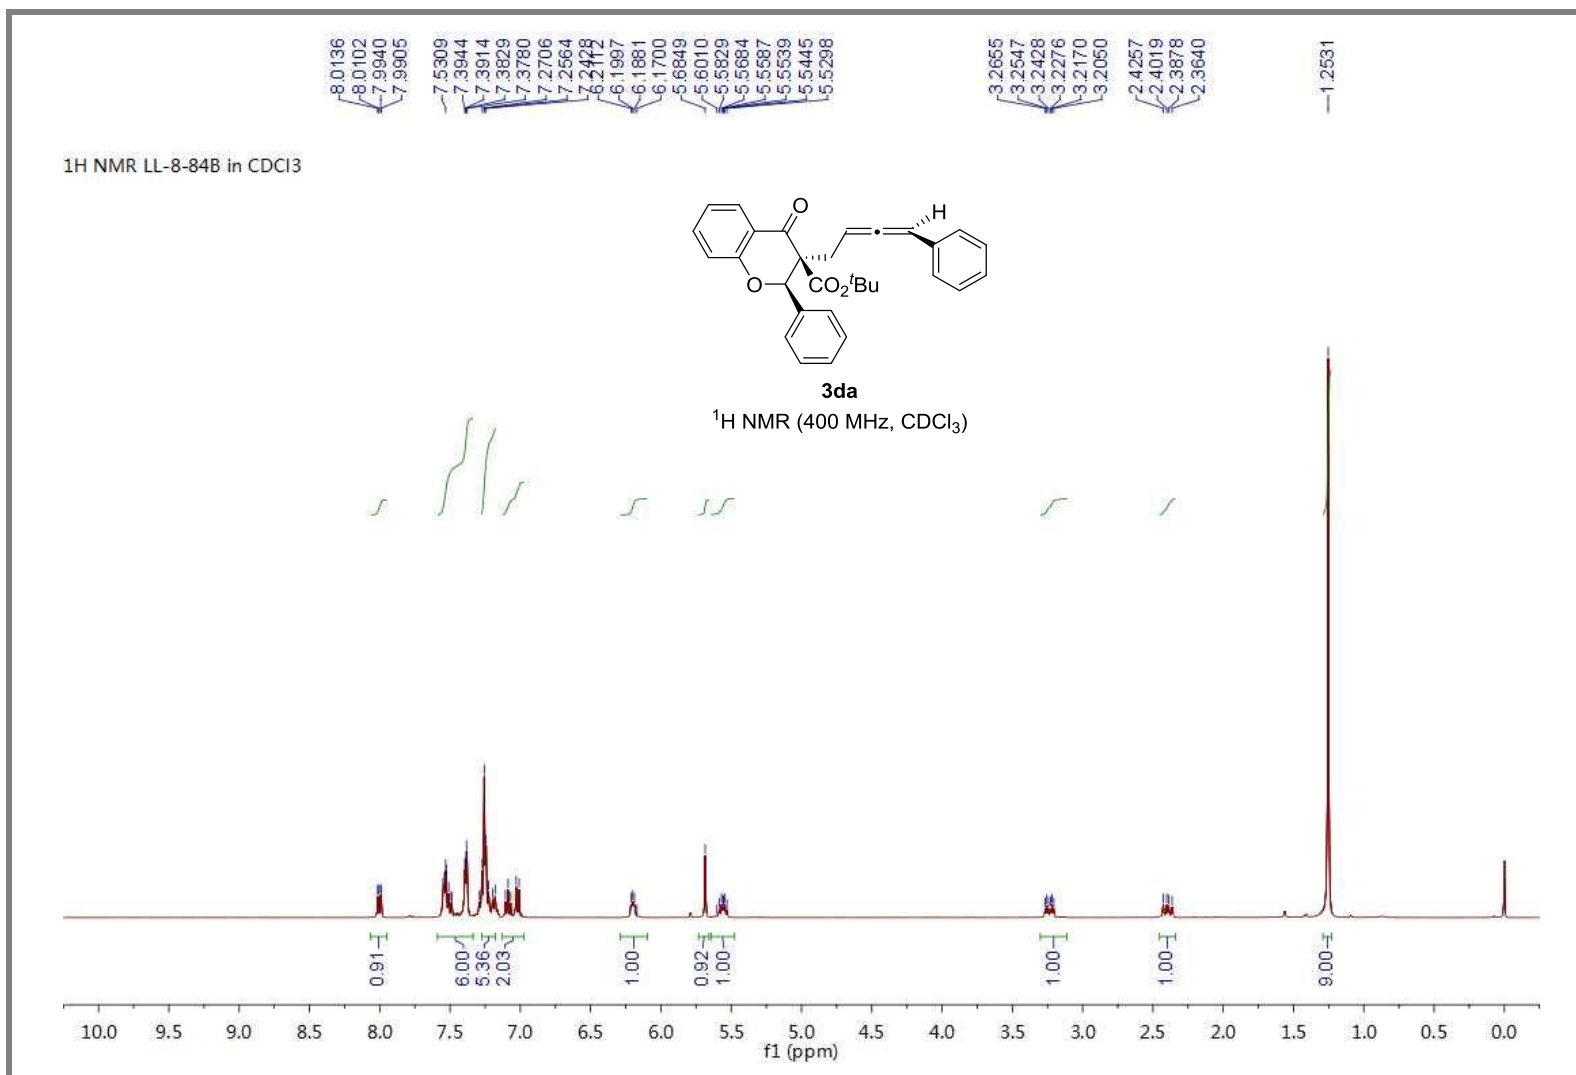

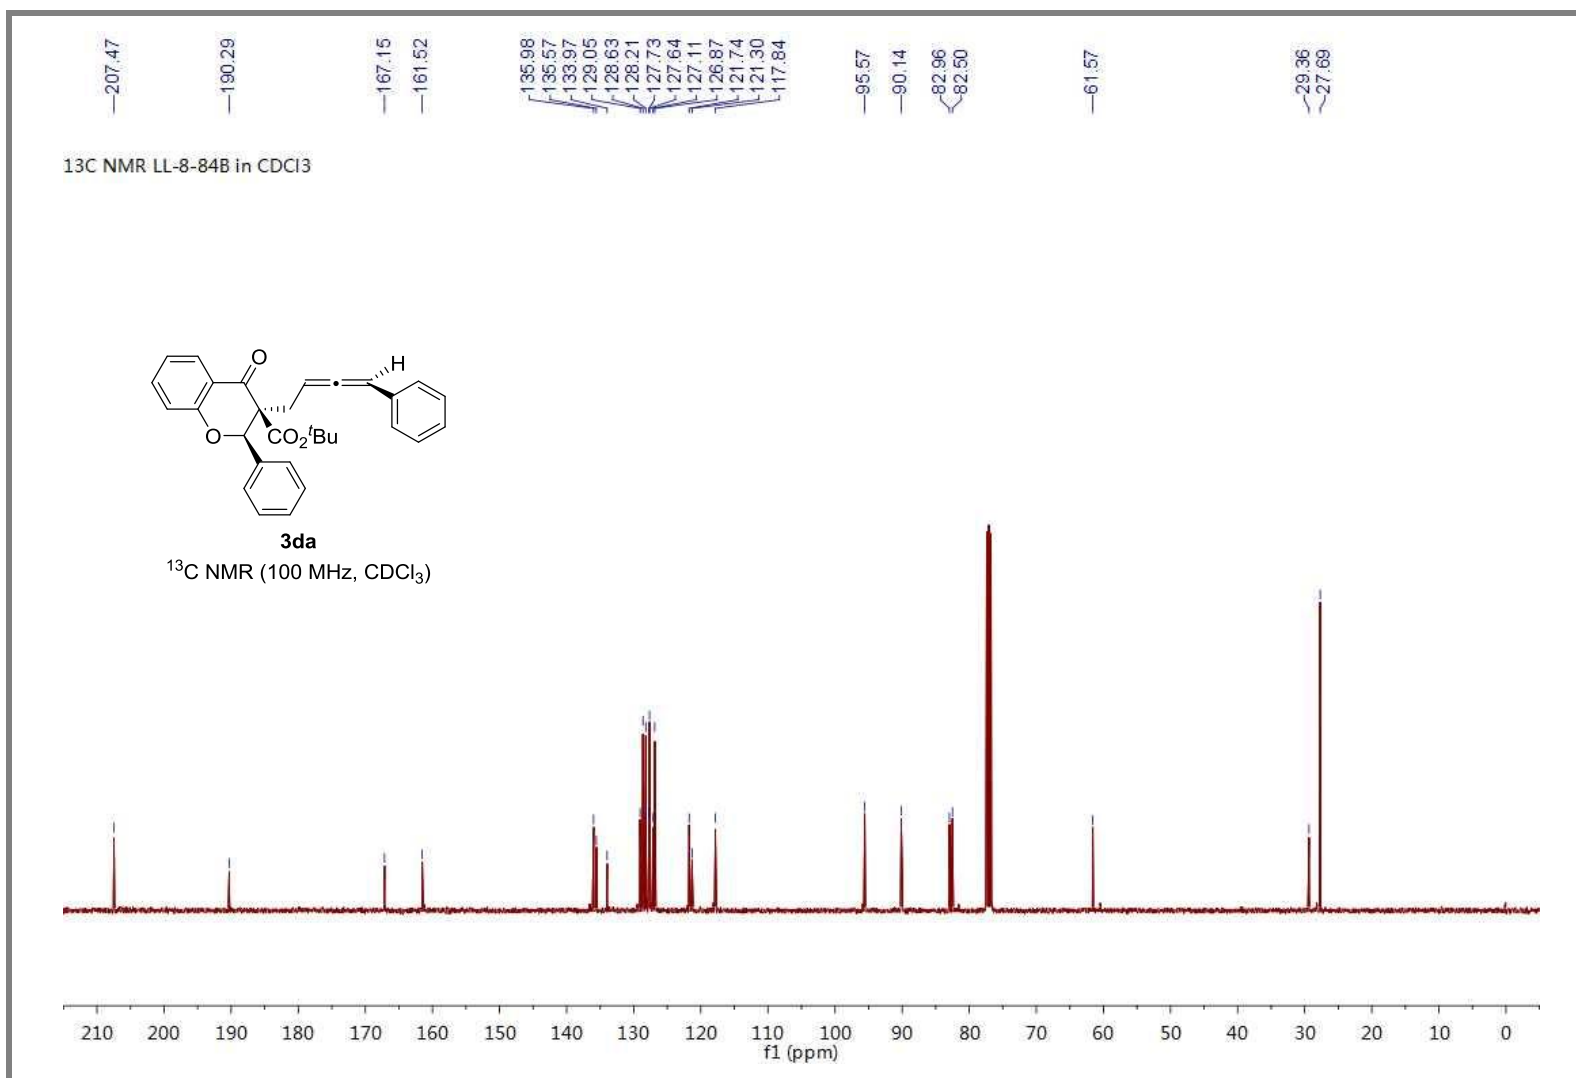

Data File C:\CHEM32\1\DATA\ZHOU-21\YZN020452.D  
 Sample Name: LL-8-84B +/-

=====  
 Acq. Operator :  
 Acq. Instrument : Instrument 1 Location : -  
 Injection Date : 1/16/2022 2:40:59 AM  
 Acq. Method : C:\CHEM32\1\METHODS\DEF\_LC.M  
 Last changed : 1/16/2022 2:37:00 AM  
 (modified after loading)  
 Analysis Method : C:\CHEM32\1\METHODS\DEF\_LC.M  
 Last changed : 1/16/2022 3:11:59 AM  
 (modified after loading)  
 Sample Info : AD-3, Hexane/i-PrOH = 99/1, 1.0 mL/min, 30 oC, 254 nm

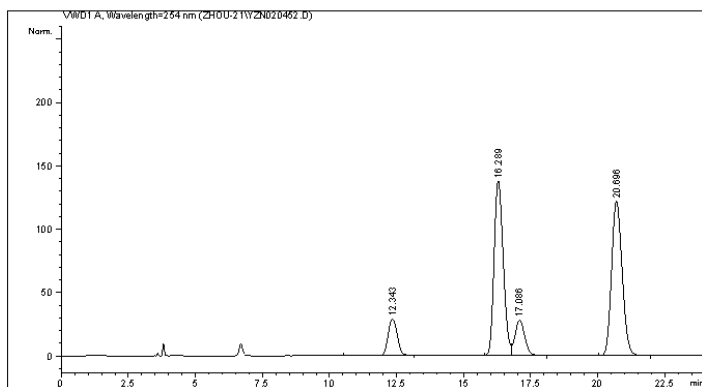

=====  
 Area Percent Report  
 =====

Sorted By : Signal  
 Multiplier: : 1.0000  
 Dilution: : 1.0000  
 Use Multiplier & Dilution Factor with ISTDs

Signal 1: VWD1 A, Wavelength=254 nm

| Peak # | RetTime [min] | Type | Width [min] | Area [mAU] | Height [mAU] | Area %  |
|--------|---------------|------|-------------|------------|--------------|---------|
| 1      | 12.343        | VB   | 0.3787      | 679.84802  | 28.65406     | 8.5002  |
| 2      | 16.289        | BV   | 0.3699      | 3266.26392 | 137.69011    | 40.8386 |
| 3      | 17.086        | VB   | 0.3915      | 707.85175  | 27.95877     | 8.8504  |
| 4      | 20.696        | BB   | 0.4303      | 3344.02783 | 122.05649    | 41.8108 |

Totals : 7997.99152 316.35943

=====  
 \*\*\* End of Report \*\*\*

Instrument 1 1/16/2022 3:12:04 AM

Page 1 of 1

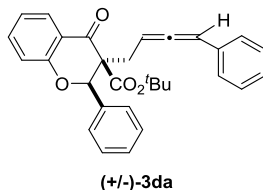

Data File C:\CHEM32\1\DATA\ZHOU-21\YZN020451.D  
 Sample Name: LL-8-84 B

=====  
 Acq. Operator :  
 Acq. Instrument : Instrument 1 Location : -  
 Injection Date : 1/16/2022 2:11:58 AM  
 Acq. Method : C:\CHEM32\1\METHODS\DEF\_LC.M  
 Last changed : 1/16/2022 1:42:40 AM  
 (modified after loading)  
 Analysis Method : C:\CHEM32\1\METHODS\DEF\_LC.M  
 Last changed : 6/15/2022 8:04:22 AM  
 (modified after loading)  
 Sample Info : AD-3, Hexane/i-PrOH = 99/1, 1.0 mL/min, 30 oC, 254 nm

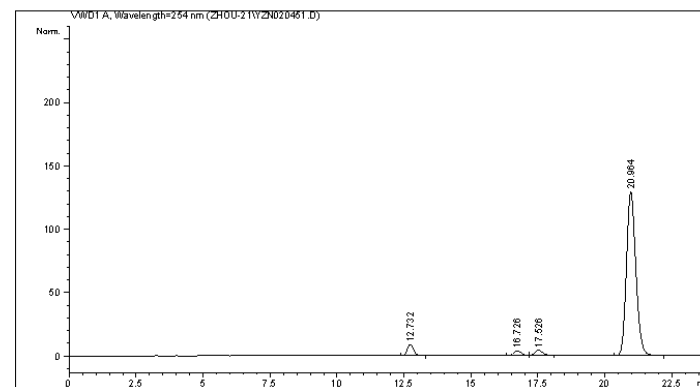

=====  
 Area Percent Report  
 =====

Sorted By : Signal  
 Multiplier: : 1.0000  
 Dilution: : 1.0000  
 Use Multiplier & Dilution Factor with ISTDs

Signal 1: VWD1 A, Wavelength=254 nm

| Peak # | RetTime [min] | Type | Width [min] | Area [mAU] | Height [mAU] | Area %  |
|--------|---------------|------|-------------|------------|--------------|---------|
| 1      | 12.732        | BB   | 0.2540      | 142.20184  | 8.73670      | 4.1266  |
| 2      | 16.726        | BV   | 0.3096      | 79.56863   | 3.96833      | 2.3090  |
| 3      | 17.526        | VV   | 0.3259      | 90.82600   | 4.23491      | 2.6357  |
| 4      | 20.964        | VB   | 0.3733      | 3133.42603 | 129.15248    | 90.9288 |

Totals : 3446.02250 146.09242

=====  
 \*\*\* End of Report \*\*\*

Instrument 1 6/15/2022 8:04:26 AM

Page 1 of 1

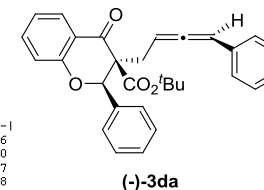



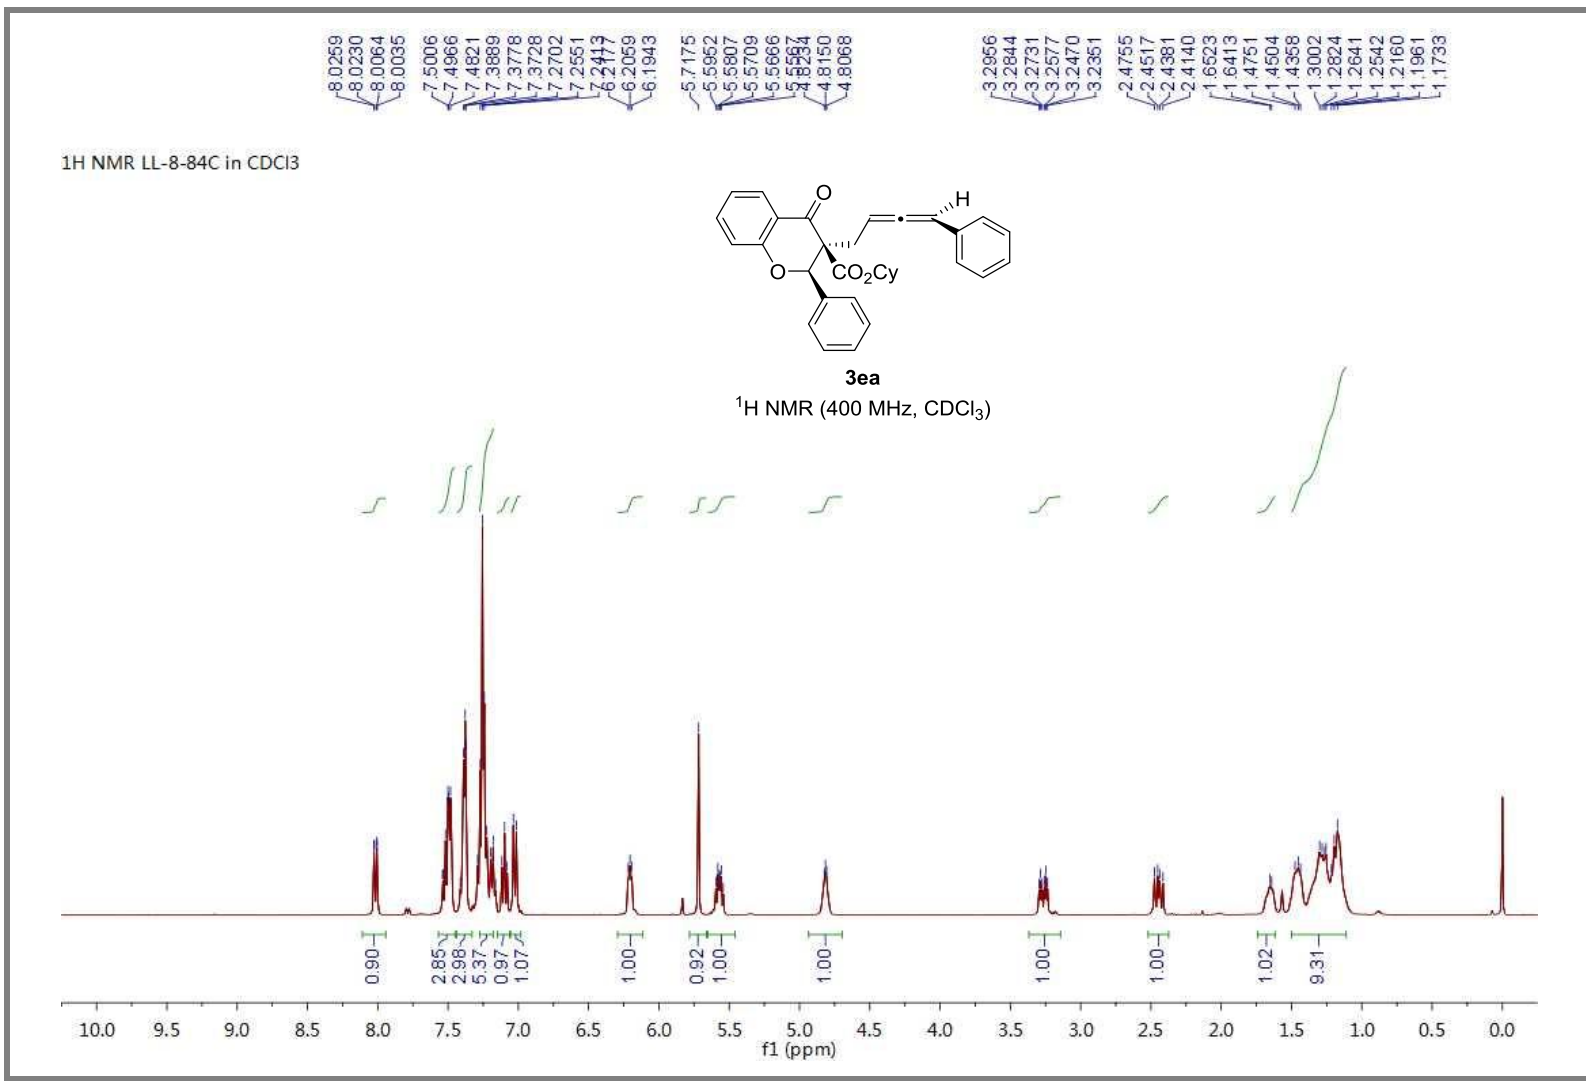

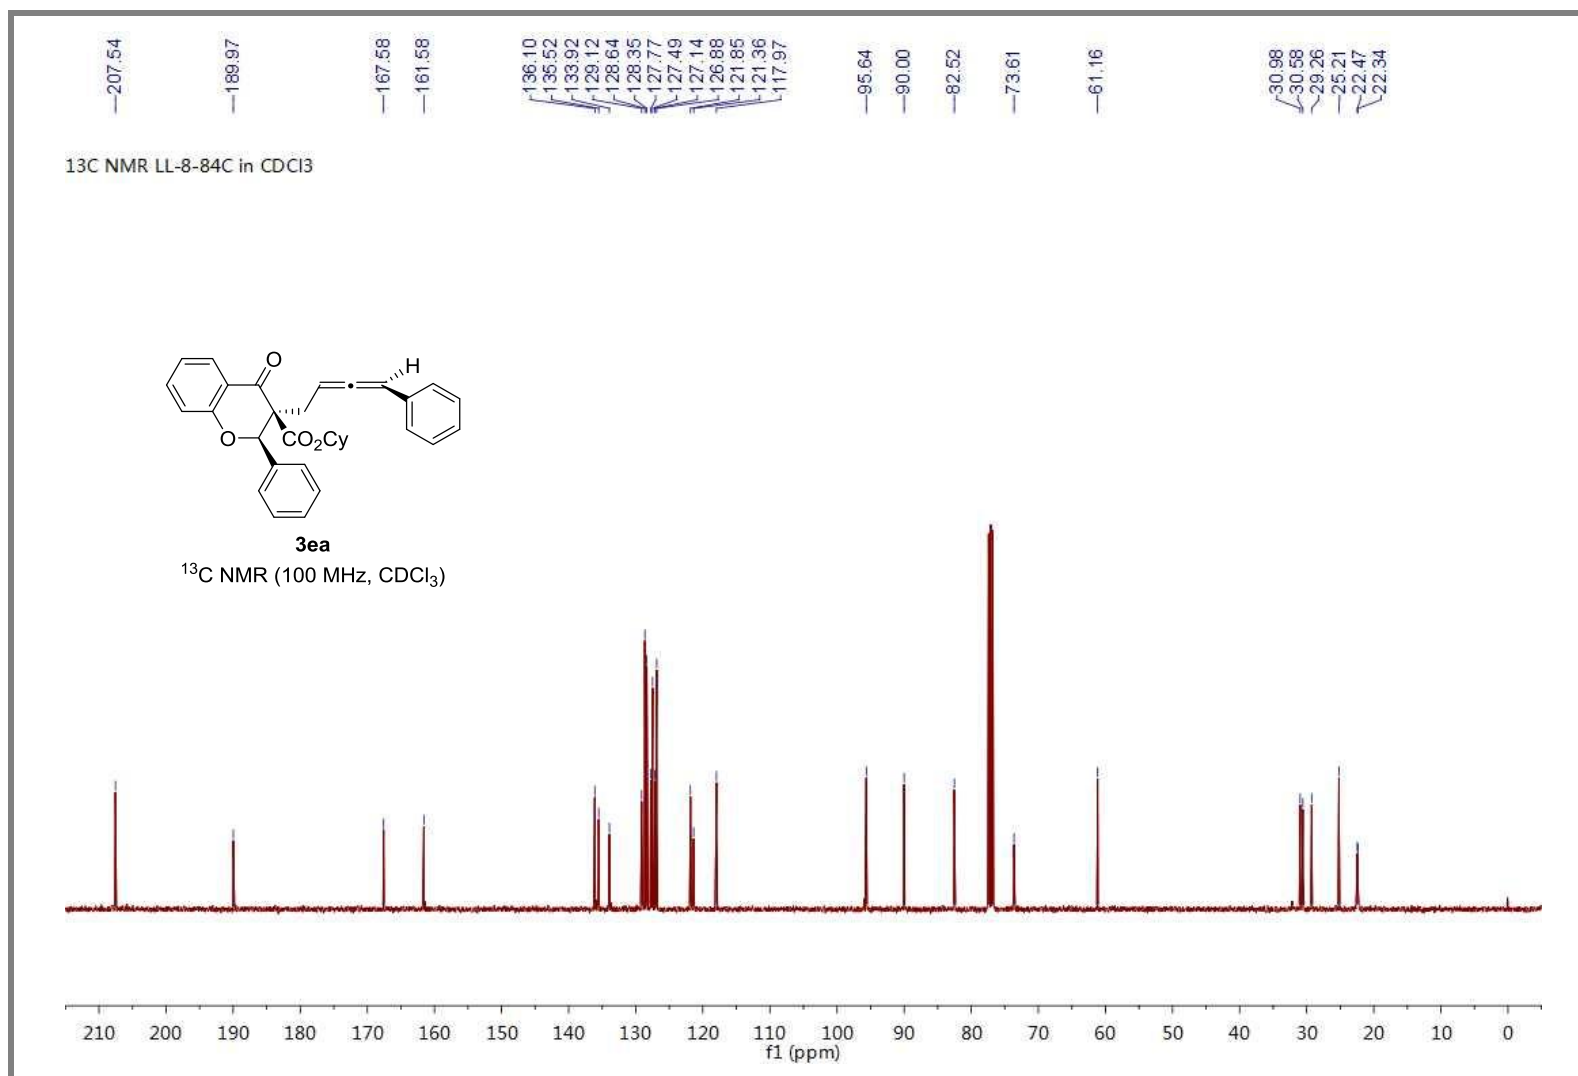

Data File C:\CHEM32\1\DATA\ZHOU-21\YZN020448.D  
 Sample Name: LL-8-84C +/-

=====  
 Acq. Operator :  
 Acq. Instrument : Instrument 1 Location : -  
 Injection Date : 1/15/2022 8:17:36 AM  
 Acq. Method : C:\CHEM32\1\METHODS\DEF\_LC.M  
 Last changed : 1/15/2022 7:49:40 AM  
 (modified after loading)  
 Analysis Method : C:\CHEM32\1\METHODS\DEF\_LC.M  
 Last changed : 1/16/2022 3:00:38 AM  
 (modified after loading)  
 Sample Info : AD-3, Hexane/i-PrOH = 98/2, 1.0 mL/min, 30 oC, 254 nm

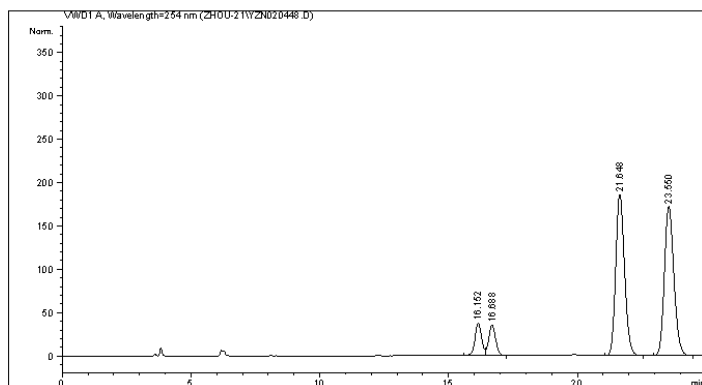

=====  
 Area Percent Report  
 =====

Sorted By : Signal  
 Multiplier: : 1.0000  
 Dilution: : 1.0000  
 Use Multiplier & Dilution Factor with ISTDs

Signal 1: WVD1 A, Wavelength=254 nm

| Peak # | RetTime [min] | Type | Width [min] | Area [mAU*s] | Height [mAU] | Area %  |
|--------|---------------|------|-------------|--------------|--------------|---------|
| 1      | 16.152        | BV   | 0.2740      | 671.10840    | 37.55547     | 6.5966  |
| 2      | 16.688        | VB   | 0.2867      | 666.36212    | 35.62247     | 6.5500  |
| 3      | 21.648        | EB   | 0.3681      | 4428.58887   | 185.99136    | 43.5307 |
| 4      | 23.550        | BB   | 0.3952      | 4407.42920   | 171.90681    | 43.3227 |

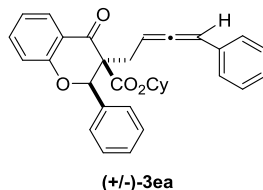

Totals : 1.01735e4 431.07611

=====  
 \*\*\* End of Report \*\*\*

Instrument 1 1/16/2022 3:00:44 AM

Page 1 of 1

Data File C:\CHEM32\1\DATA\ZHOU-21\YZN020447.D  
 Sample Name: LL-8-84C

=====  
 Acq. Operator :  
 Acq. Instrument : Instrument 1 Location : -  
 Injection Date : 1/15/2022 4:48:56 AM  
 Acq. Method : C:\CHEM32\1\METHODS\DEF\_LC.M  
 Last changed : 1/15/2022 4:36:08 AM  
 (modified after loading)  
 Analysis Method : C:\CHEM32\1\METHODS\DEF\_LC.M  
 Last changed : 6/15/2022 8:09:31 AM  
 (modified after loading)  
 Sample Info : AD-3, Hexane/i-PrOH = 98/2, 1.0 mL/min, 30 oC, 254 nm

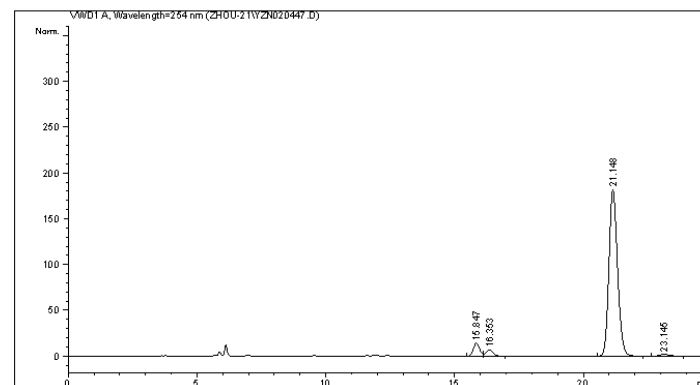

=====  
 Area Percent Report  
 =====

Sorted By : Signal  
 Multiplier: : 1.0000  
 Dilution: : 1.0000  
 Use Multiplier & Dilution Factor with ISTDs

Signal 1: WVD1 A, Wavelength=254 nm

| Peak # | RetTime [min] | Type | Width [min] | Area [mAU*s] | Height [mAU] | Area %  |
|--------|---------------|------|-------------|--------------|--------------|---------|
| 1      | 15.847        | BV   | 0.2608      | 236.18698    | 14.00446     | 5.1294  |
| 2      | 16.353        | VB   | 0.2801      | 124.84607    | 6.83315      | 2.7113  |
| 3      | 21.148        | EB   | 0.3571      | 4199.25146   | 181.64714    | 91.1969 |
| 4      | 23.148        | BB   | 0.3869      | 44.31448     | 1.76028      | 0.9624  |

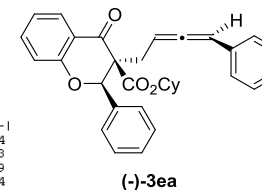

Totals : 4604.59899 204.24503

=====  
 \*\*\* End of Report \*\*\*

Instrument 1 6/15/2022 8:09:35 AM

Page 1 of 1

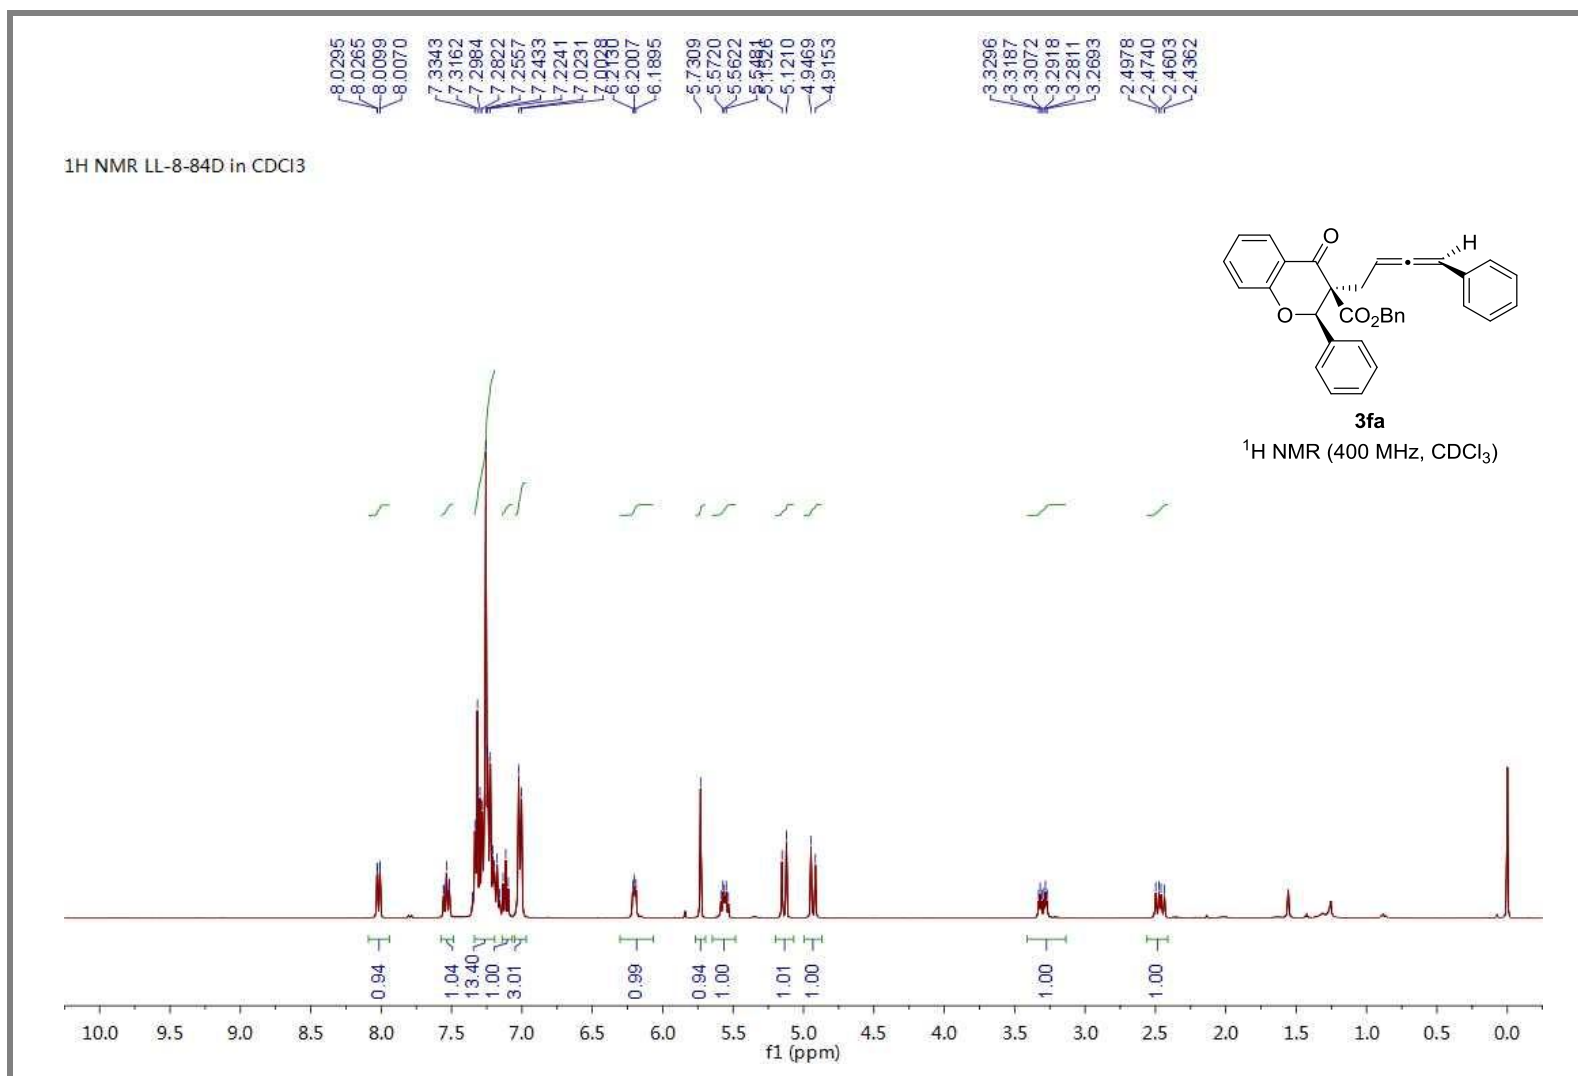

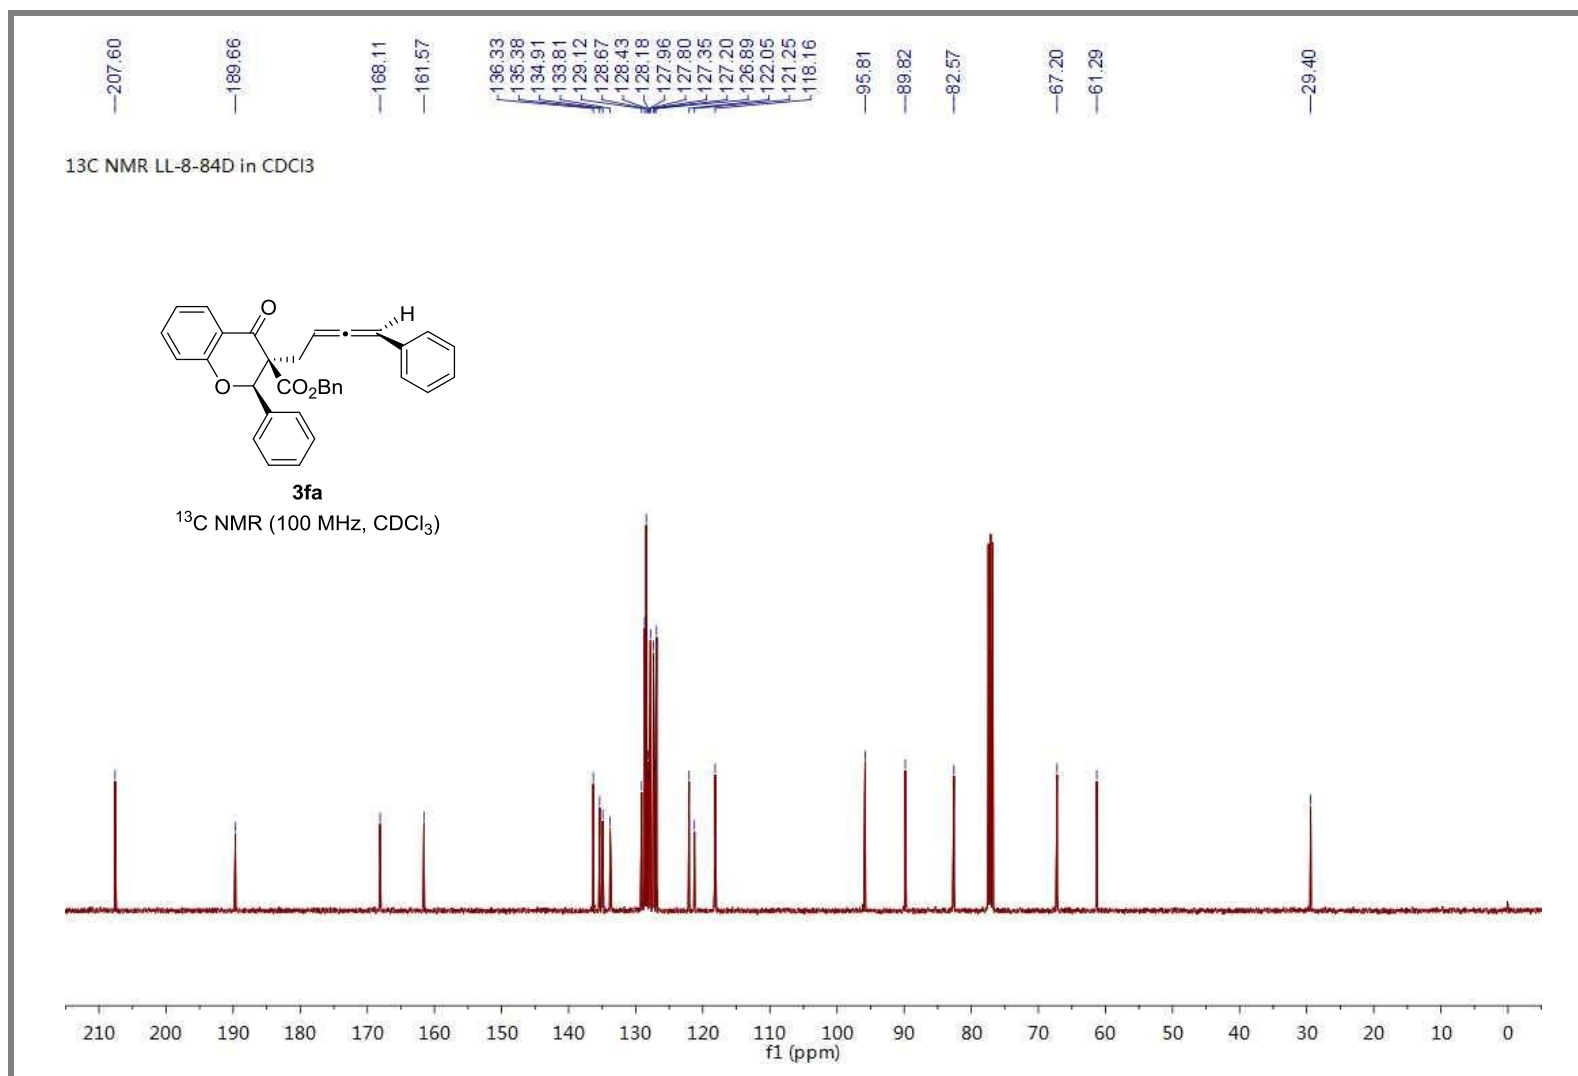

Data File C:\CHEM32\1\DATA\ZHOU-21\YZN020450.D  
 Sample Name: LL-8-84D +/-

=====  
 Acq. Operator :  
 Acq. Instrument : Instrument 1 Location : -  
 Injection Date : 1/15/2022 9:29:38 AM  
 Acq. Method : C:\CHEM32\1\METHODS\DEF\_LC.M  
 Last changed : 1/15/2022 9:27:29 AM  
 (modified after loading)  
 Analysis Method : C:\CHEM32\1\METHODS\DEF\_LC.M  
 Last changed : 1/16/2022 3:04:48 AM  
 (modified after loading)  
 Sample Info : AD-3, Hexane/i-PrOH = 97/3, 1.0 mL/min, 30 oC, 254 nm

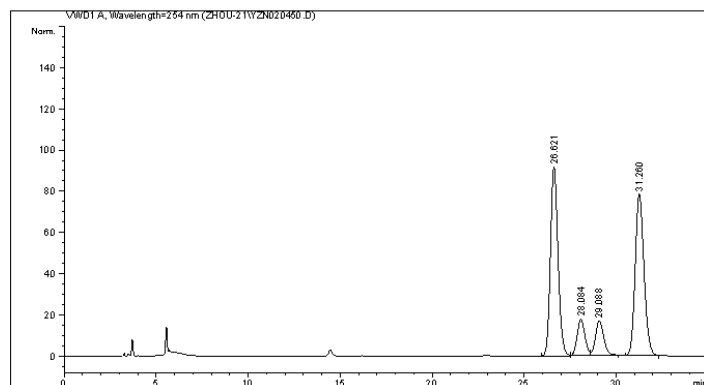

=====  
 Area Percent Report  
 =====

Sorted By : Signal  
 Multiplier: : 1.0000  
 Dilution: : 1.0000  
 Use Multiplier & Dilution Factor with ISTDs

Signal 1: VWD1 A, Wavelength=254 nm

| Peak # | RetTime [min] | Type | Width [min] | Area [mAU*s] | Height [mAU] | Area %  |
|--------|---------------|------|-------------|--------------|--------------|---------|
| 1      | 26.621        | BV   | 0.4401      | 2627.69873   | 91.82907     | 41.7876 |
| 2      | 28.084        | VV   | 0.4507      | 520.09857    | 17.84485     | 8.2710  |
| 3      | 29.088        | VB   | 0.4814      | 529.96985    | 16.94309     | 8.4280  |
| 4      | 31.260        | BB   | 0.5124      | 2610.45972   | 78.36729     | 41.5134 |

Totals : 6288.22687 204.98429

=====  
 \*\*\* End of Report \*\*\*

Instrument 1 1/16/2022 3:04:54 AM

Page 1 of 1

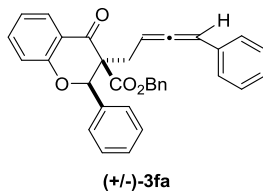

Data File C:\CHEM32\1\DATA\ZHOU-21\YZN020449.D  
 Sample Name: LL-8-84D

=====  
 Acq. Operator :  
 Acq. Instrument : Instrument 1 Location : -  
 Injection Date : 1/15/2022 8:50:05 AM  
 Acq. Method : C:\CHEM32\1\METHODS\DEF\_LC.M  
 Last changed : 1/15/2022 8:43:22 AM  
 (modified after loading)  
 Analysis Method : C:\CHEM32\1\METHODS\DEF\_LC.M  
 Last changed : 6/15/2022 8:12:57 AM  
 (modified after loading)  
 Sample Info : AD-3, Hexane/i-PrOH = 97/3, 1.0 mL/min, 30 oC, 254 nm

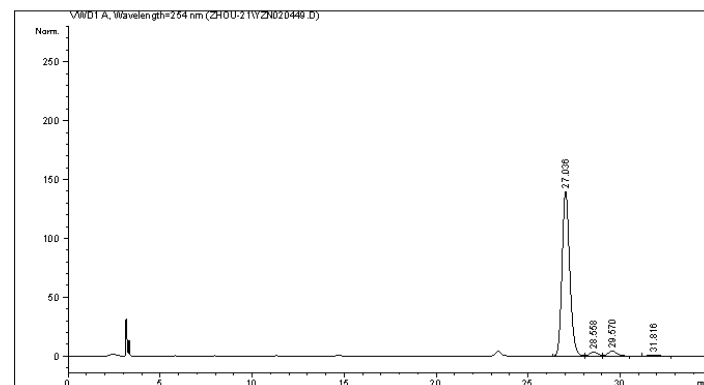

=====  
 Area Percent Report  
 =====

Sorted By : Signal  
 Multiplier: : 1.0000  
 Dilution: : 1.0000  
 Use Multiplier & Dilution Factor with ISTDs

Signal 1: VWD1 A, Wavelength=254 nm

| Peak # | RetTime [min] | Type | Width [min] | Area [mAU*s] | Height [mAU] | Area %  |
|--------|---------------|------|-------------|--------------|--------------|---------|
| 1      | 27.036        | BV   | 0.4465      | 4072.18286   | 140.19965    | 94.1272 |
| 2      | 28.558        | VV   | 0.4691      | 97.39050     | 3.19550      | 2.2511  |
| 3      | 29.570        | VB   | 0.4894      | 134.01563    | 4.19242      | 3.0977  |
| 4      | 31.816        | BB   | 0.5066      | 22.66817     | 6.93395e-1   | 0.5240  |

Totals : 4326.25716 148.28096

=====  
 \*\*\* End of Report \*\*\*

Instrument 1 6/15/2022 8:13:13 AM

Page 1 of 1

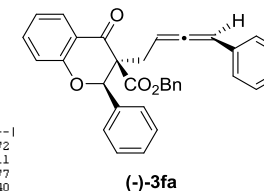

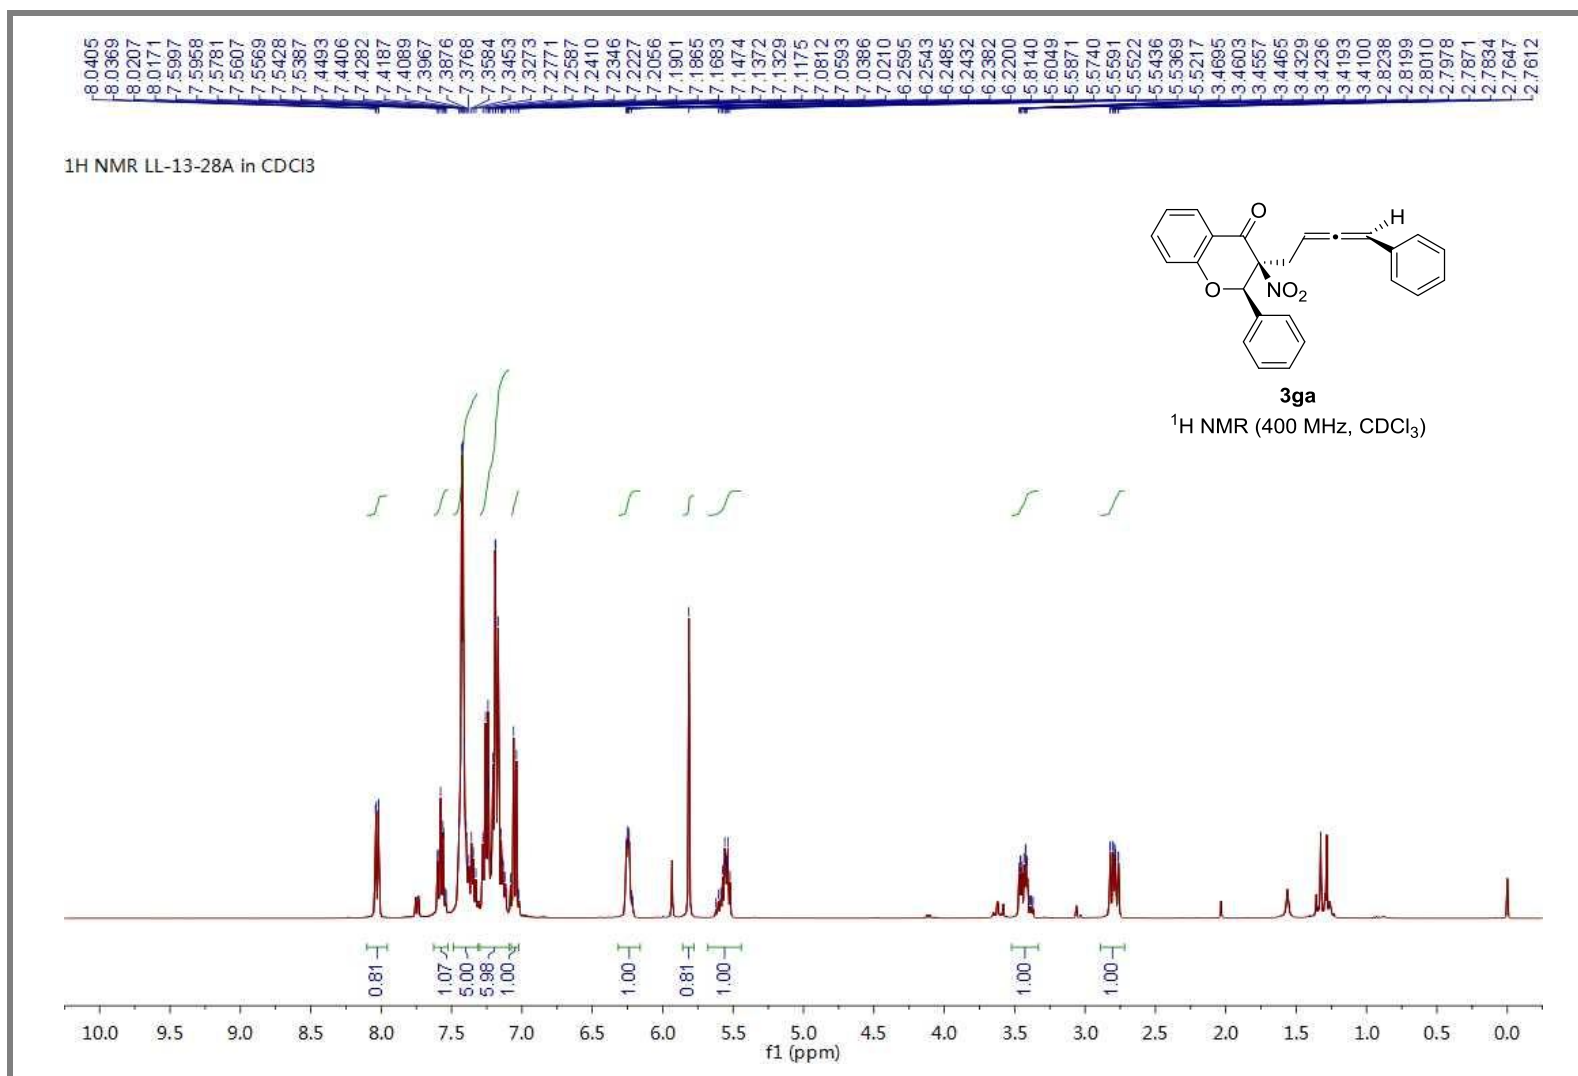

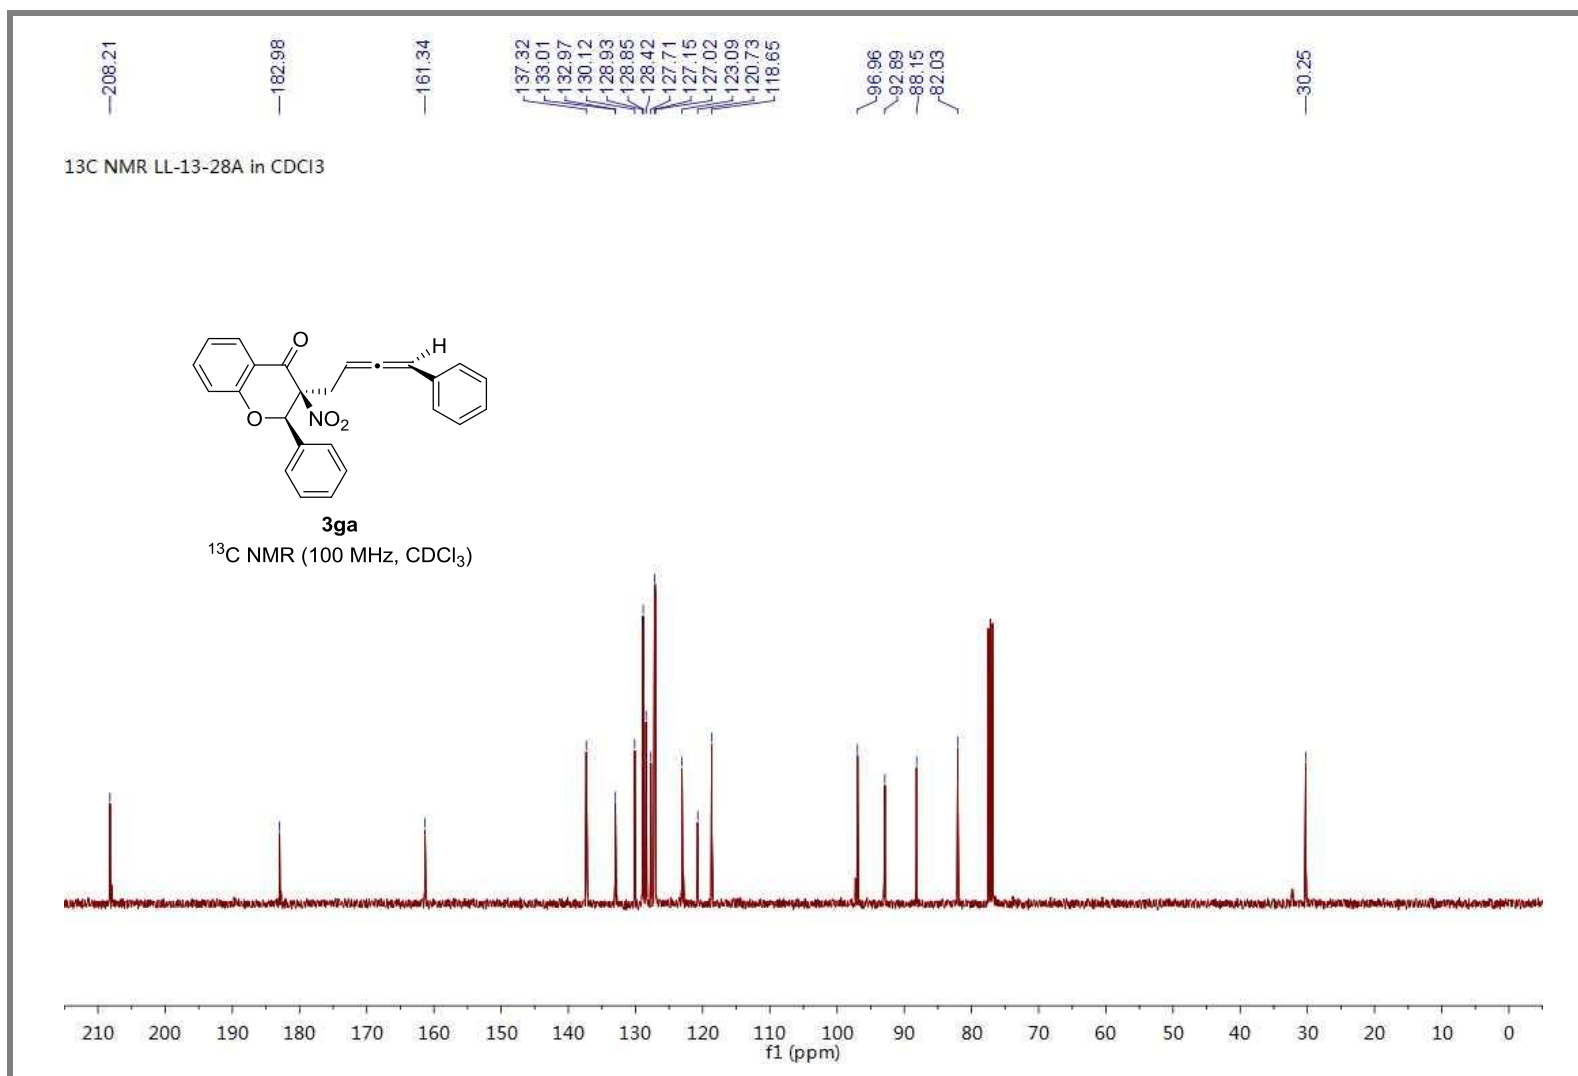



Data File D:\USERS\CHEMSTATION\1\DATA\ZHOU2021\YZ3003705 14-39-04.D  
 Sample Name: LL-8-31 +/- 1

```

=====
Acq. Operator   : SYSTEM
Sample Operator : SYSTEM
Acq. Instrument : 1260II                      Location : -
Injection Date  : 11/24/2021 2:39:05 PM      Inj       : 1
                                           Inj Volume: No inj
Acq. Method    : C:\Users\Public\Documents\ChemStation\1\Methods\def_LC.M
Last changed   : 11/24/2021 2:05:23 PM by SYSTEM
               (modified after loading)
Analysis Method : C:\Users\Public\Documents\ChemStation\1\Methods\def_LC.M
Last changed   : 9/27/2023 9:09:36 PM by SYSTEM
               (modified after loading)
Sample Info    : AD-3, n-Hexane/1-PrOH = 98/2, 0.8 mL/min, 30 oC, 254 nm
  
```

Additional Info : Peak(s) manually integrated

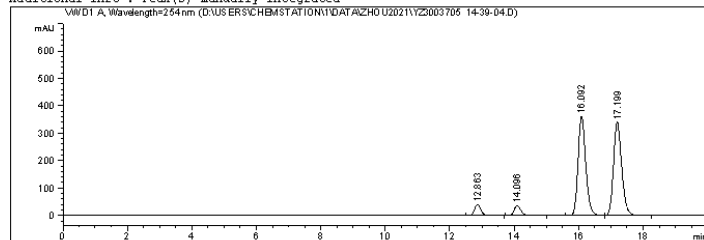

Area Percent Report

```

Sorted By      : Signal
Multiplier     : 1.0000
Dilution       : 1.0000
Do not use Multiplier & Dilution Factor with ISTDs
  
```

Signal 1: VWD1 A, Wavelength=254 nm

| Peak # | RetTime [min] | Type | Width [min] | Area [mAU*s] | Height [mAU] | Area %  |
|--------|---------------|------|-------------|--------------|--------------|---------|
| 1      | 12.863        | BB   | 0.2096      | 553.90057    | 40.49520     | 4.2227  |
| 2      | 14.096        | BB   | 0.2267      | 552.29535    | 37.31293     | 4.2104  |
| 3      | 16.092        | BB   | 0.2546      | 5999.64648   | 361.53226    | 45.7385 |
| 4      | 17.199        | BB   | 0.2725      | 6011.43799   | 339.63300    | 45.8284 |

Totals : 1.31173e4 778.97338

\*\*\* End of Report \*\*\*

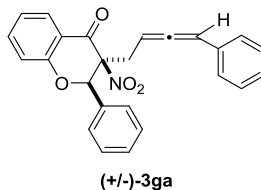

Data File D:\USERS\CHEMSTATION\1\DATA\ZHOU2023\YZ3007644 14-50-07.D  
 Sample Name: LL-13-28A-1

```

=====
Acq. Operator   : SYSTEM
Sample Operator : SYSTEM
Acq. Instrument : 1260II                      Location : -
Injection Date  : 9/20/2023 2:50:07 PM      Inj       : 1
                                           Inj Volume: No inj
Acq. Method    : C:\Users\Public\Documents\ChemStation\1\Methods\def_LC.M
Last changed   : 9/20/2023 1:38:07 PM by SYSTEM
               (modified after loading)
Analysis Method : C:\Users\Public\Documents\ChemStation\1\Methods\def_LC.M
Last changed   : 9/27/2023 9:11:50 PM by SYSTEM
               (modified after loading)
Sample Info    : AD-3, n-Hexane/1-PrOH = 98/2, 0.8 mL/min, 30 oC, 254 nm
  
```

Additional Info : Peak(s) manually integrated

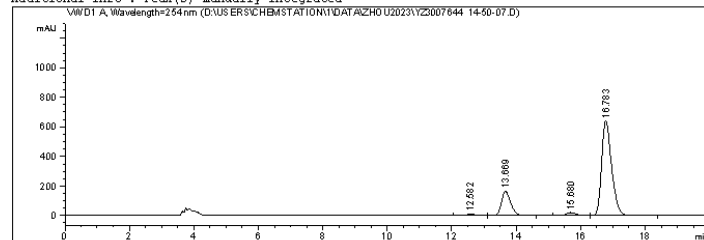

Area Percent Report

```

Sorted By      : Signal
Multiplier     : 1.0000
Dilution       : 1.0000
Do not use Multiplier & Dilution Factor with ISTDs
  
```

Signal 1: VWD1 A, Wavelength=254 nm

| Peak # | RetTime [min] | Type | Width [min] | Area [mAU*s] | Height [mAU] | Area %  |
|--------|---------------|------|-------------|--------------|--------------|---------|
| 1      | 12.582        | BB   | 0.3108      | 187.08337    | 9.29691      | 1.0599  |
| 2      | 13.669        | BB   | 0.3019      | 3276.88501   | 164.83392    | 18.5640 |
| 3      | 15.680        | BV   | 0.3083      | 425.16043    | 20.90683     | 2.4086  |
| 4      | 16.783        | VB   | 0.3265      | 1.37627e4    | 641.01404    | 77.9675 |

Totals : 1.76518e4 836.05170

\*\*\* End of Report \*\*\*

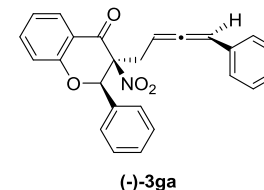

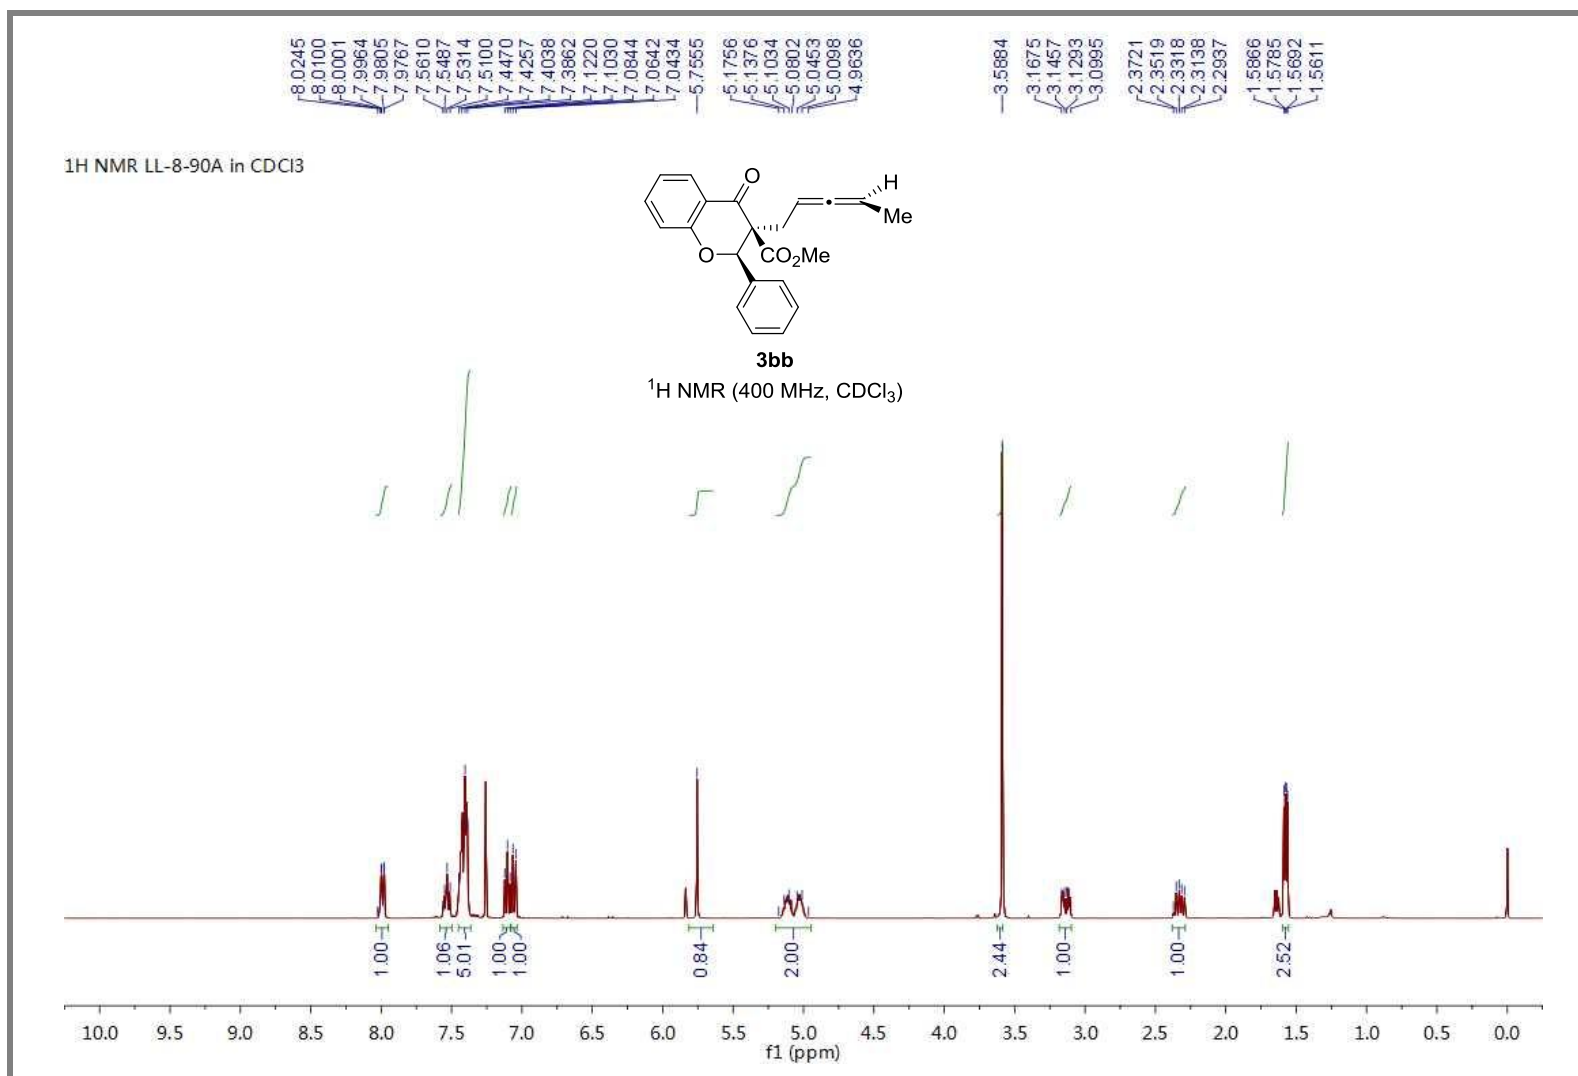

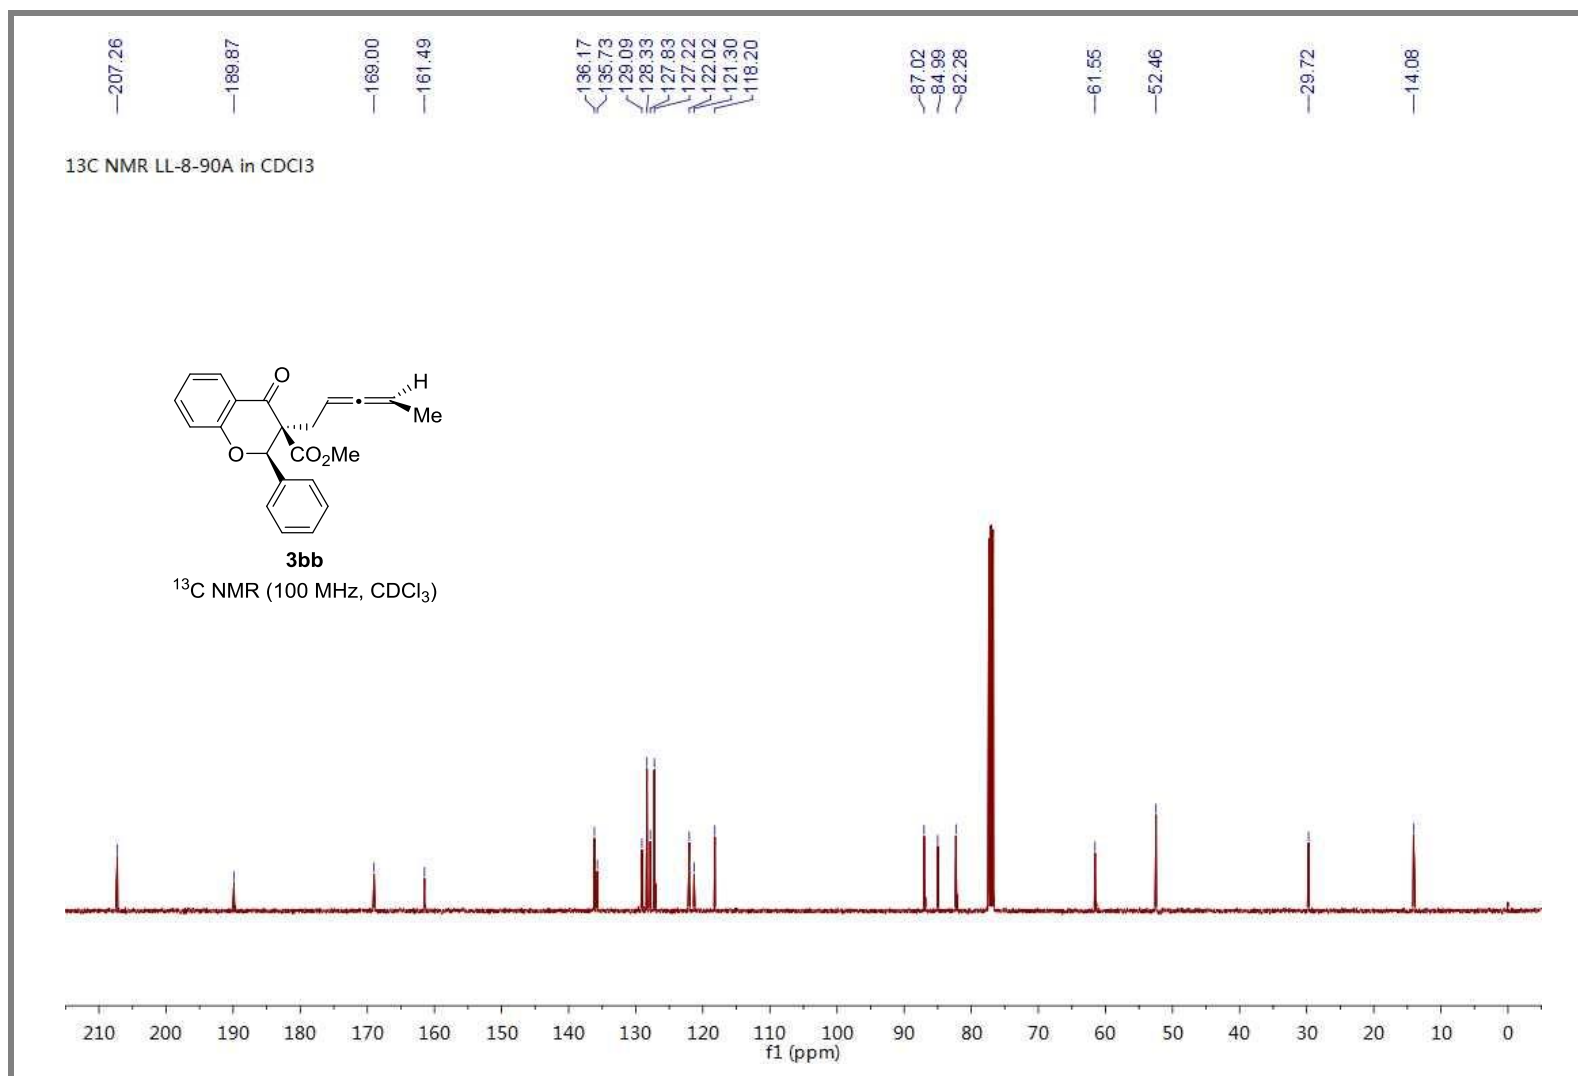

Data File C:\CHEM32\1\DATA\ZHOU-22\YZN020488.D  
 Sample Name: LL-8-90A +/-

=====  
 Acq. Operator :  
 Acq. Instrument : Instrument 1 Location : -  
 Injection Date : 1/19/2022 2:24:16 AM  
 Acq. Method : C:\CHEM32\1\METHODS\DEF\_LC.M  
 Last changed : 1/19/2022 2:23:11 AM  
 (modified after loading)  
 Analysis Method : C:\CHEM32\1\METHODS\DEF\_LC.M  
 Last changed : 1/19/2022 2:56:17 AM  
 (modified after loading)  
 Sample Info : IB, Hexane/i-PrOH = 99/1, 1.0 mL/min, 30 oC, 254 nm

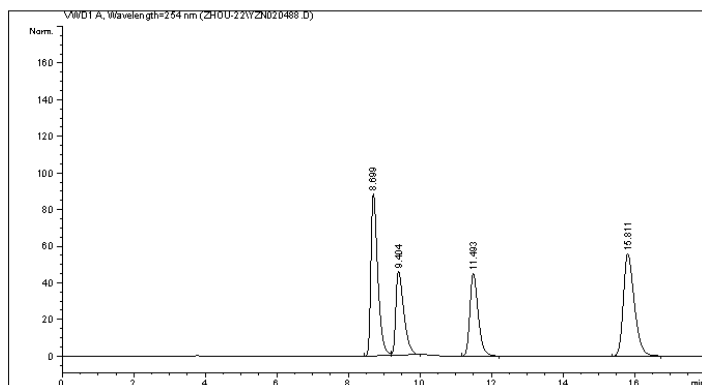

=====  
 Area Percent Report  
 =====

Sorted By : Signal  
 Multiplier: : 1.0000  
 Dilution: : 1.0000  
 Use Multiplier & Dilution Factor with ISTDs

Signal 1: WVD1 A, Wavelength=254 nm

| Peak # | RetTime [min] | Type | Width [min] | Area mAU   | Height %s | Area %  |
|--------|---------------|------|-------------|------------|-----------|---------|
| 1      | 8.699         | EV   | 0.2000      | 1177.30811 | 88.68472  | 30.8241 |
| 2      | 9.404         | VB   | 0.2338      | 711.30988  | 45.75225  | 18.6234 |
| 3      | 11.493        | BB   | 0.2476      | 733.77289  | 45.20787  | 19.2115 |
| 4      | 15.811        | BB   | 0.3255      | 1197.04639 | 55.90168  | 31.3409 |

Totals : 3819.43726 235.54651

=====  
 \*\*\* End of Report \*\*\*

Instrument 1 1/19/2022 2:56:20 AM

Page 1 of 1

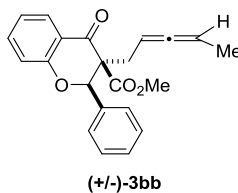

Data File C:\CHEM32\1\DATA\ZHOU-22\YZN020487.D  
 Sample Name: LL-8-90A

=====  
 Acq. Operator :  
 Acq. Instrument : Instrument 1 Location : -  
 Injection Date : 1/19/2022 2:05:09 AM  
 Acq. Method : C:\CHEM32\1\METHODS\DEF\_LC.M  
 Last changed : 1/19/2022 1:45:26 AM  
 (modified after loading)  
 Analysis Method : C:\CHEM32\1\METHODS\DEF\_LC.M  
 Last changed : 6/15/2022 7:58:29 AM  
 (modified after loading)  
 Sample Info : IB, Hexane/i-PrOH = 99/1, 1.0 mL/min, 30 oC, 254 nm

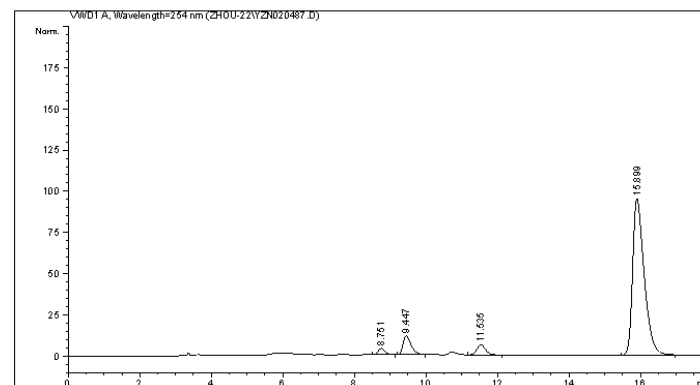

=====  
 Area Percent Report  
 =====

Sorted By : Signal  
 Multiplier: : 1.0000  
 Dilution: : 1.0000  
 Use Multiplier & Dilution Factor with ISTDs

Signal 1: WVD1 A, Wavelength=254 nm

| Peak # | RetTime [min] | Type | Width [min] | Area mAU   | Height %s | Area %  |
|--------|---------------|------|-------------|------------|-----------|---------|
| 1      | 8.751         | BB   | 0.2101      | 51.58413   | 3.81583   | 2.0912  |
| 2      | 9.447         | BB   | 0.2400      | 181.70757  | 11.48165  | 7.3664  |
| 3      | 11.535        | VB   | 0.2605      | 107.80194  | 6.30854   | 4.3702  |
| 4      | 15.899        | BB   | 0.3365      | 2125.62988 | 95.10351  | 86.1722 |

Totals : 2466.72351 116.70953

=====  
 \*\*\* End of Report \*\*\*

Instrument 1 6/15/2022 7:58:41 AM

Page 1 of 1

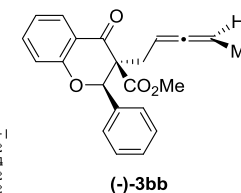

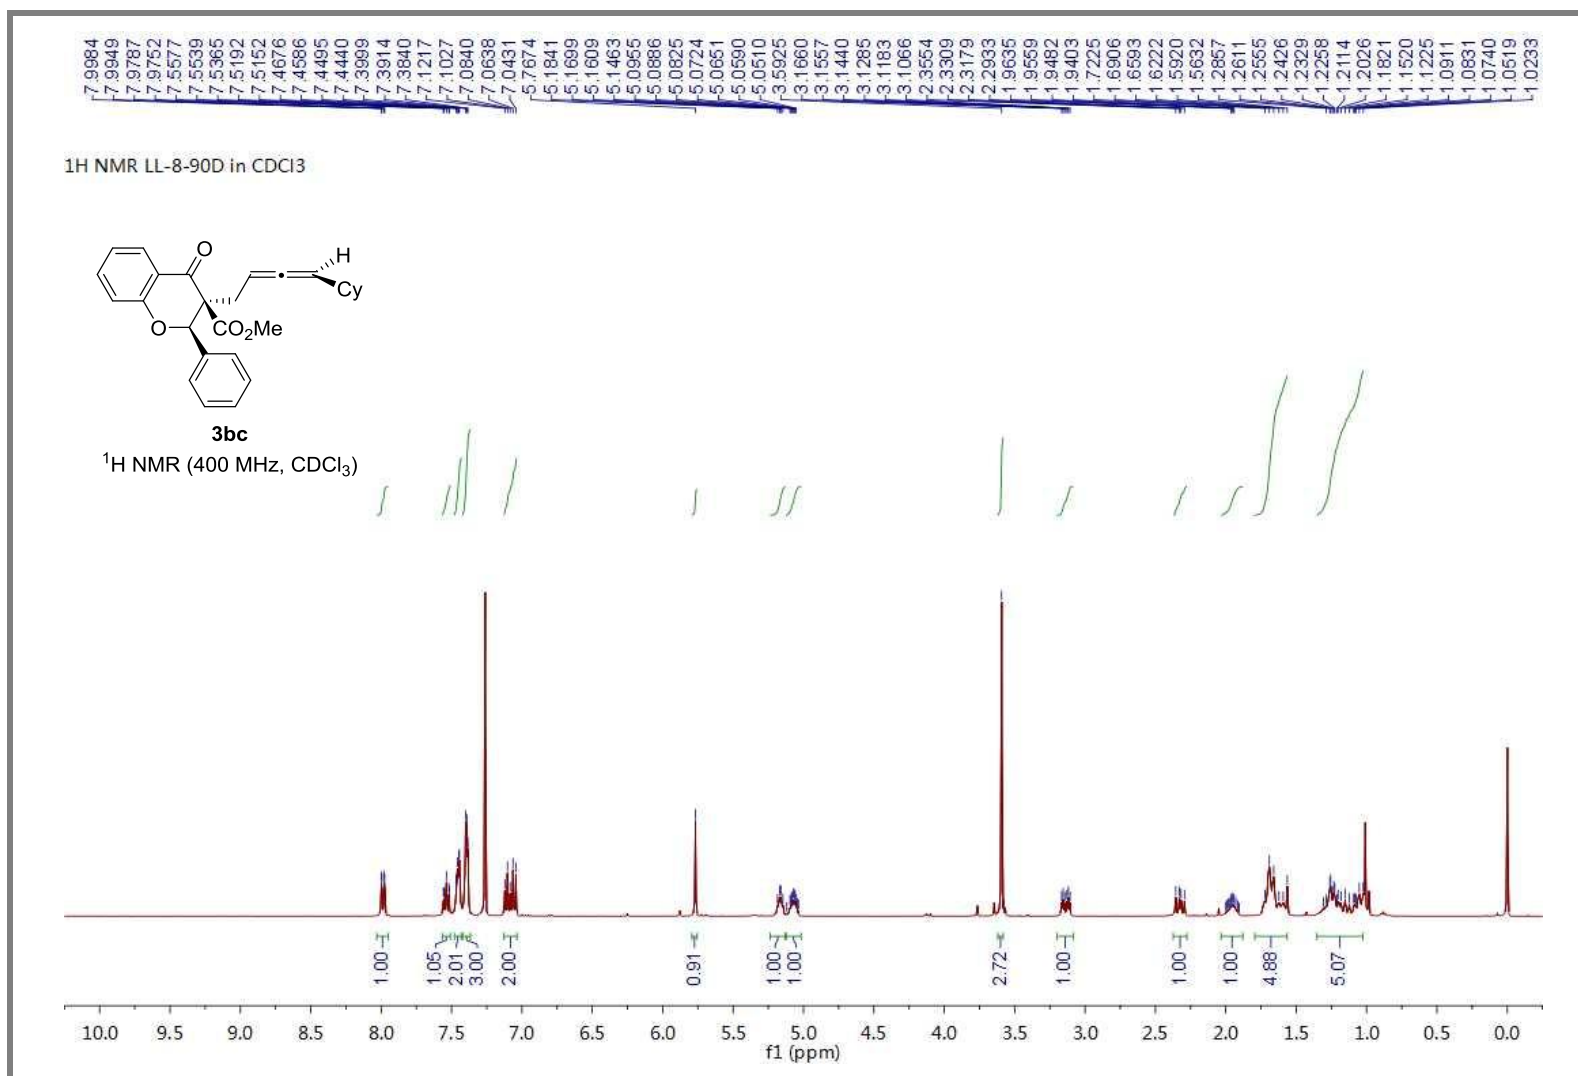

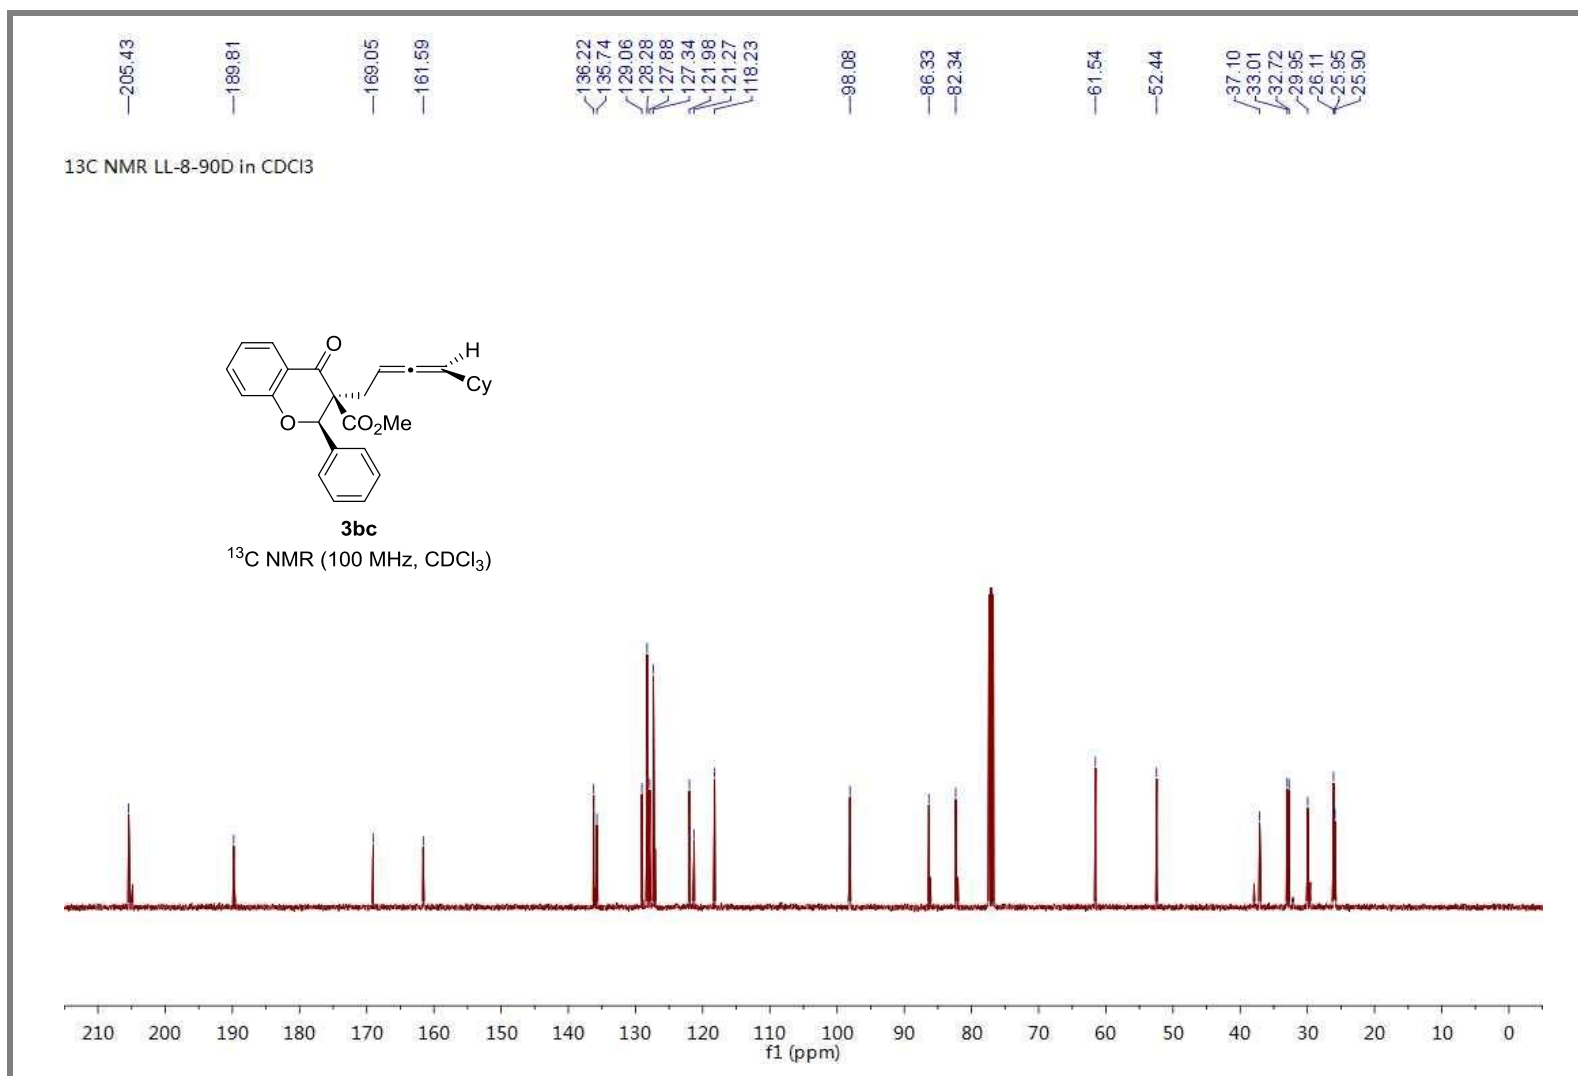

Data File D:\USERS\CHEMSTATION\1\DATA\ZHOU2022\YZ3004020 10-40-03.D  
 Sample Name: LL-8-90D +/- (1)

```

=====
Acq. Operator   : SYSTEM
Sample Operator : SYSTEM
Acq. Instrument : 1260II                      Location : -
Injection Date  : 1/17/2022 10:40:03 AM      Inj       : 1
                                           Inj Volume: No inj
Acq. Method    : C:\Users\Public\Documents\ChemStation\1\Methods\def_LC.M
Last changed   : 1/17/2022 9:10:08 AM by SYSTEM
               (modified after loading)
Analysis Method: C:\Users\Public\Documents\ChemStation\1\Methods\def_LC.M
Last changed   : 9/27/2023 9:15:16 PM by SYSTEM
               (modified after loading)
Sample Info    : AD-3, n-Hexane/1-PrOH = 97/3, 0.8 mL/min, 30 oC, 254 nm
  
```

Additional Info : Peak(s) manually integrated  
 VWD1 A, Wavelength=254 nm (BUS ERS\CHEMSTATION\1\DATA\ZHOU2022\YZ3004020 10-40-03.D)

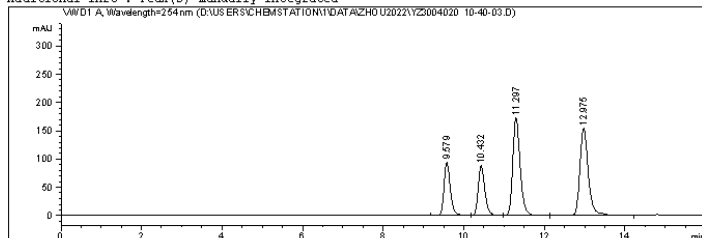

Area Percent Report

```

Sorted By      : Signal
Multiplier     : 1.0000
Dilution      : 1.0000
Do not use Multiplier & Dilution Factor with ISTDs
  
```

Signal 1: VWD1 A, Wavelength=254 nm

| Peak # | RetTime [min] | Type | Width [min] | Area [mAU*s] | Height [mAU] | Area %  |
|--------|---------------|------|-------------|--------------|--------------|---------|
| 1      | 9.579         | BV   | 0.1674      | 1036.89233   | 94.19881     | 15.9424 |
| 2      | 10.432        | VB   | 0.1757      | 1014.32281   | 87.85240     | 15.5954 |
| 3      | 11.297        | BB   | 0.1946      | 2197.13647   | 172.51257    | 33.7814 |
| 4      | 12.975        | VB R | 0.2213      | 2255.62329   | 154.56055    | 34.6807 |

Totals : 6503.97491 509.12433

\*\*\* End of Report \*\*\*

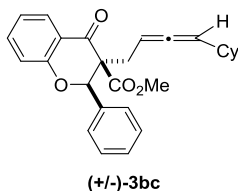

Data File D:\USERS\CHEMSTATION\1\DATA\ZHOU2022\YZ3004039 15-23-31.D  
 Sample Name: LL-8-90 D

```

=====
Acq. Operator   : SYSTEM
Sample Operator : SYSTEM
Acq. Instrument : 1260II                      Location : -
Injection Date  : 1/20/2022 3:23:31 PM      Inj       : 1
                                           Inj Volume: No inj
Acq. Method    : C:\Users\Public\Documents\ChemStation\1\Methods\def_LC.M
Last changed   : 1/20/2022 3:02:28 PM by SYSTEM
               (modified after loading)
Analysis Method: C:\Users\Public\Documents\ChemStation\1\Methods\def_LC.M
Last changed   : 9/27/2023 9:15:16 PM by SYSTEM
               (modified after loading)
Sample Info    : AD-3, n-Hexane/1-PrOH = 97/3, 0.8 mL/min, 30 oC, 254 nm
  
```

Additional Info : Peak(s) manually integrated  
 VWD1 A, Wavelength=254 nm (BUS ERS\CHEMSTATION\1\DATA\ZHOU2022\YZ3004039 15-23-31.D)

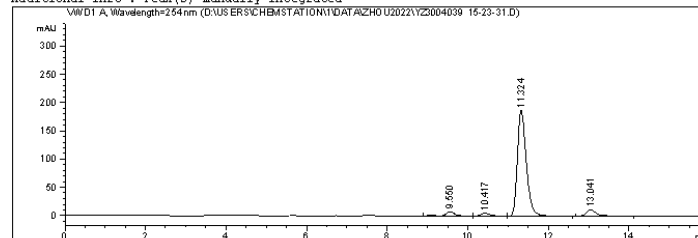

Area Percent Report

```

Sorted By      : Signal
Multiplier     : 1.0000
Dilution      : 1.0000
Do not use Multiplier & Dilution Factor with ISTDs
  
```

Signal 1: VWD1 A, Wavelength=254 nm

| Peak # | RetTime [min] | Type | Width [min] | Area [mAU*s] | Height [mAU] | Area %  |
|--------|---------------|------|-------------|--------------|--------------|---------|
| 1      | 9.550         | VB R | 0.2480      | 122.43332    | 7.44029      | 3.7532  |
| 2      | 10.417        | BV   | 0.2238      | 73.90514     | 5.07692      | 2.2656  |
| 3      | 11.324        | VB   | 0.2364      | 2868.95532   | 186.58206    | 87.9482 |
| 4      | 13.041        | BB   | 0.2622      | 196.80342    | 11.29893     | 6.0330  |

Totals : 3262.09720 210.39821

\*\*\* End of Report \*\*\*

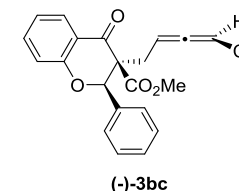

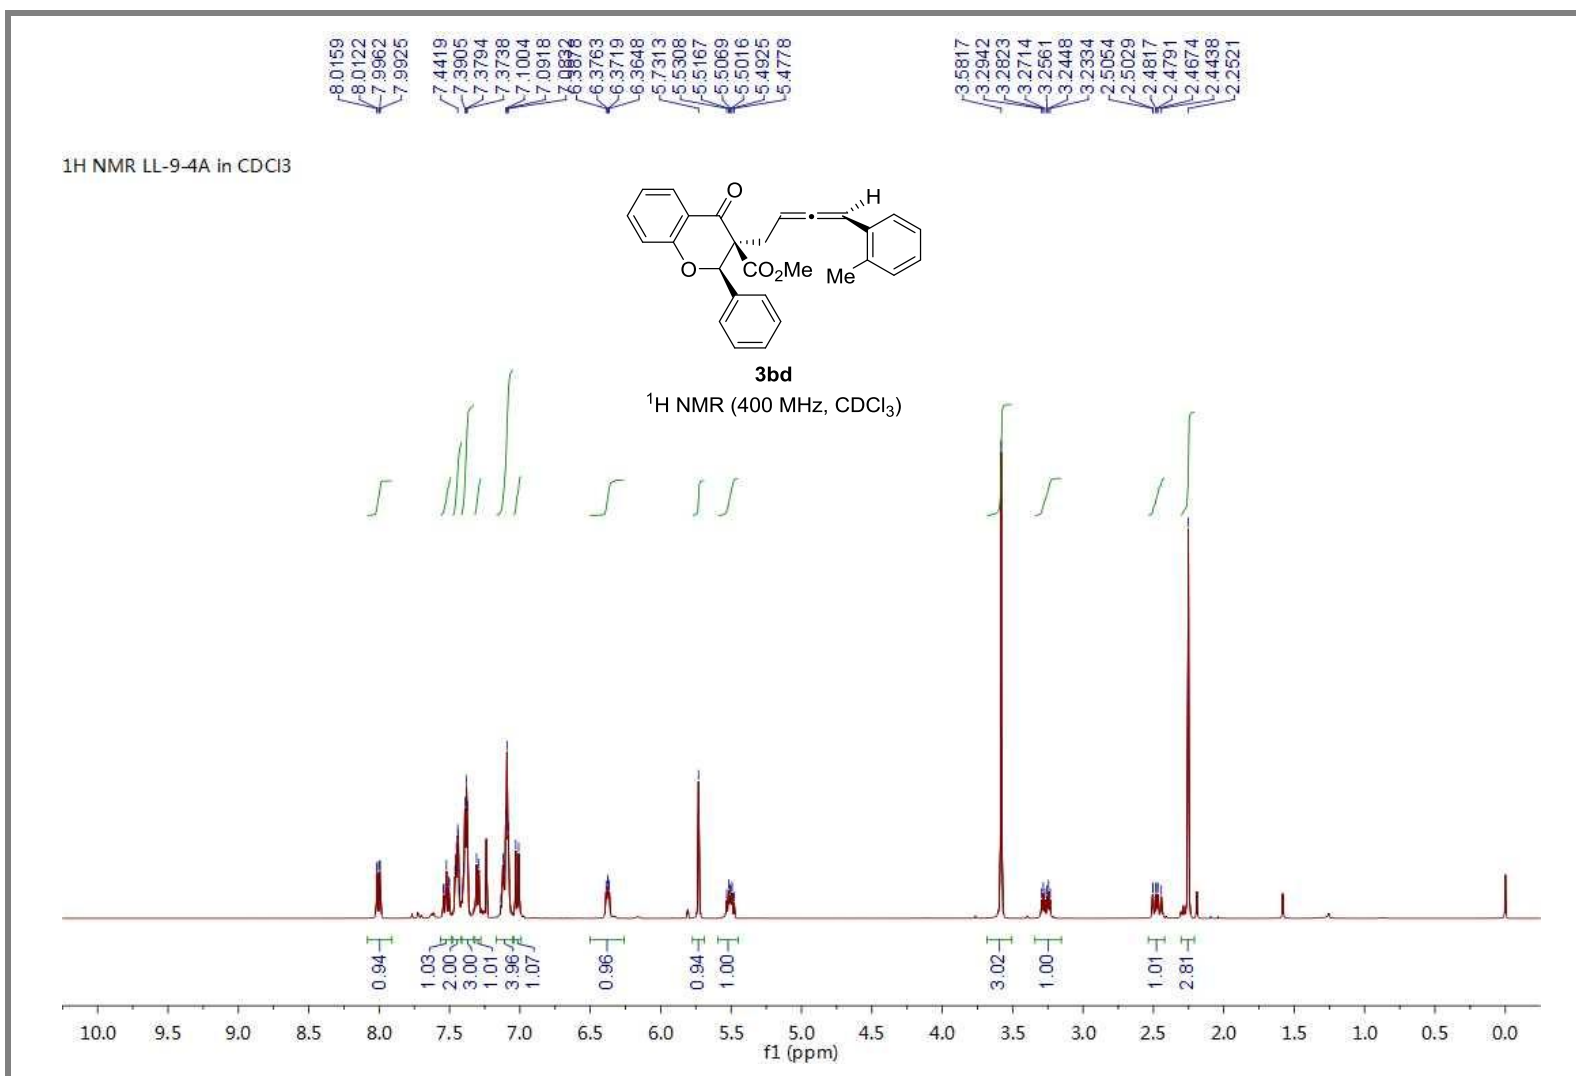



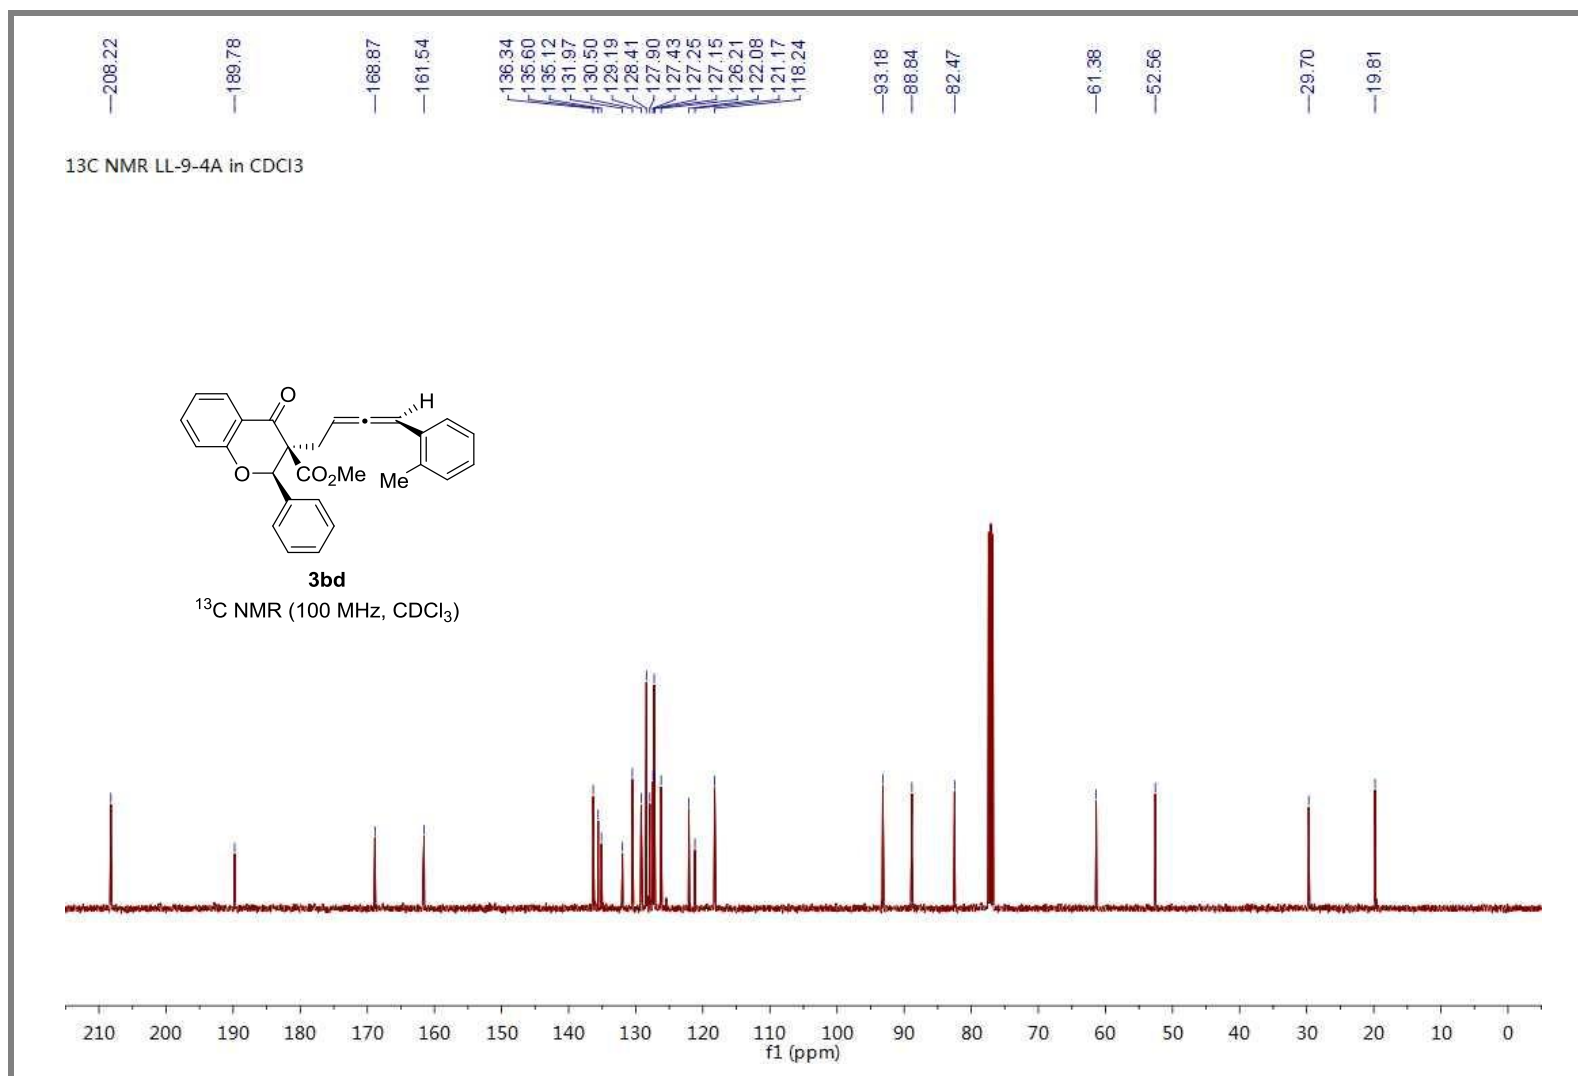

Data File C:\CHEM32\1\DATA\ZHOU-22\YZN020642.D  
 Sample Name: LL-9-4A +/-

=====  
 Acq. Operator :  
 Acq. Instrument : Instrument 1 Location : -  
 Injection Date : 2/26/2022 2:50:12 AM  
 Acq. Method : C:\CHEM32\1\METHODS\DEF\_LC.M  
 Last changed : 2/26/2022 2:48:31 AM  
 (modified after loading)  
 Analysis Method : C:\CHEM32\1\METHODS\DEF\_LC.M  
 Last changed : 2/26/2022 3:53:51 AM  
 (modified after loading)  
 Sample Info : OD-3, Hexane/i-PrOH = 97/3, 0.8 mL/min, 30 oC, 254 nm

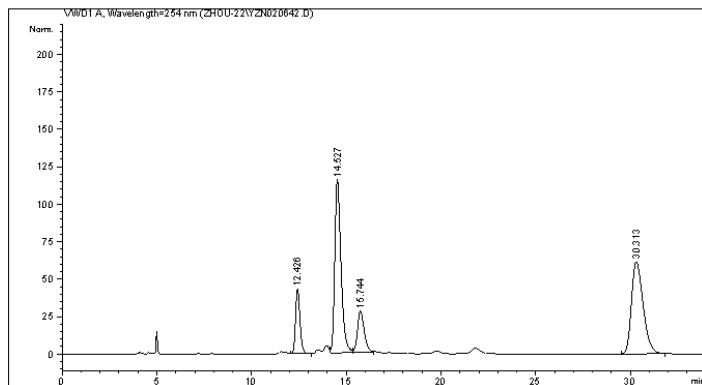

=====  
 Area Percent Report  
 =====

Sorted By : Signal  
 Multiplier: : 1.0000  
 Dilution: : 1.0000  
 Use Multiplier & Dilution Factor with ISTDs

Signal 1: WVD1 A, Wavelength=254 nm

| Peak # | RetTime [min] | Type | Width [min] | Area [mAU*s] | Height [mAU] | Area %  |
|--------|---------------|------|-------------|--------------|--------------|---------|
| 1      | 12.426        | VB   | 0.2495      | 705.01190    | 43.33867     | 10.5804 |
| 2      | 14.527        | VV   | 0.3485      | 2645.67480   | 115.62691    | 39.7048 |
| 3      | 15.744        | VB   | 0.3760      | 675.83881    | 27.45697     | 10.1426 |
| 4      | 30.313        | BB   | 0.6572      | 2636.83643   | 61.71507     | 39.5722 |

Totals : 6663.36194 248.13762

=====  
 \*\*\* End of Report \*\*\*

Instrument 1 2/26/2022 3:53:58 AM

Page 1 of 1

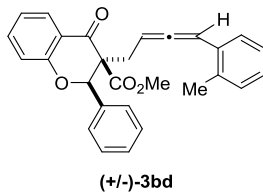

Data File C:\CHEM32\1\DATA\ZHOU-22\YZN020641.D  
 Sample Name: LL-9-4A

=====  
 Acq. Operator :  
 Acq. Instrument : Instrument 1 Location : -  
 Injection Date : 2/26/2022 2:11:58 AM  
 Acq. Method : C:\CHEM32\1\METHODS\DEF\_LC.M  
 Last changed : 2/26/2022 1:41:52 AM  
 (modified after loading)  
 Analysis Method : C:\CHEM32\1\METHODS\DEF\_LC.M  
 Last changed : 6/15/2022 7:47:15 AM  
 (modified after loading)  
 Sample Info : OD-3, Hexane/i-PrOH = 97/3, 0.8 mL/min, 30 oC, 254 nm

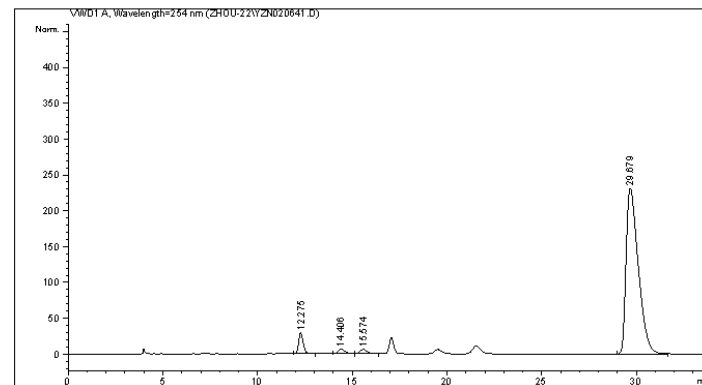

=====  
 Area Percent Report  
 =====

Sorted By : Signal  
 Multiplier: : 1.0000  
 Dilution: : 1.0000  
 Use Multiplier & Dilution Factor with ISTDs

Signal 1: WVD1 A, Wavelength=254 nm

| Peak # | RetTime [min] | Type | Width [min] | Area [mAU*s] | Height [mAU] | Area %  |
|--------|---------------|------|-------------|--------------|--------------|---------|
| 1      | 12.275        | VB   | 0.2529      | 480.19705    | 29.21026     | 4.3250  |
| 2      | 14.406        | BB   | 0.3711      | 154.46072    | 6.28627      | 1.3912  |
| 3      | 15.574        | BB   | 0.3937      | 154.72795    | 6.03518      | 1.3936  |
| 4      | 29.679        | BB   | 0.6775      | 1.03133e4    | 231.28595    | 92.8902 |

Totals : 1.11027e4 272.81765

=====  
 \*\*\* End of Report \*\*\*

Instrument 1 6/15/2022 7:47:15 AM

Page 1 of 1

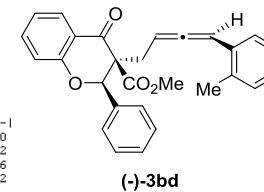

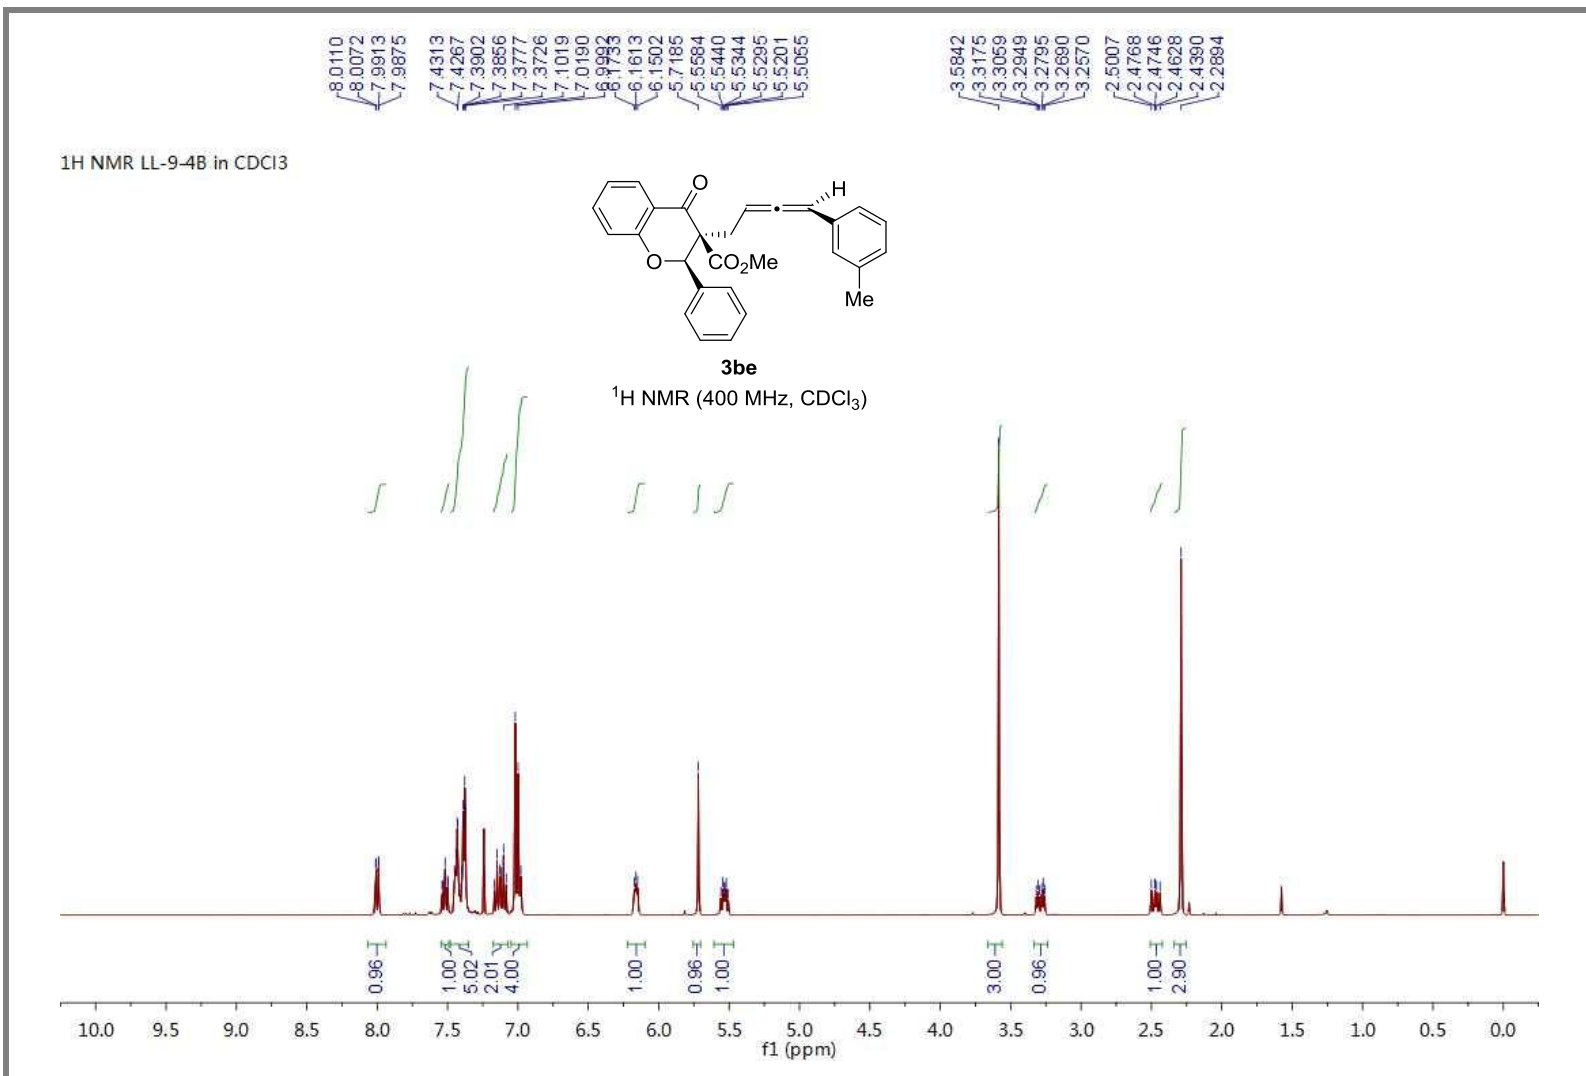

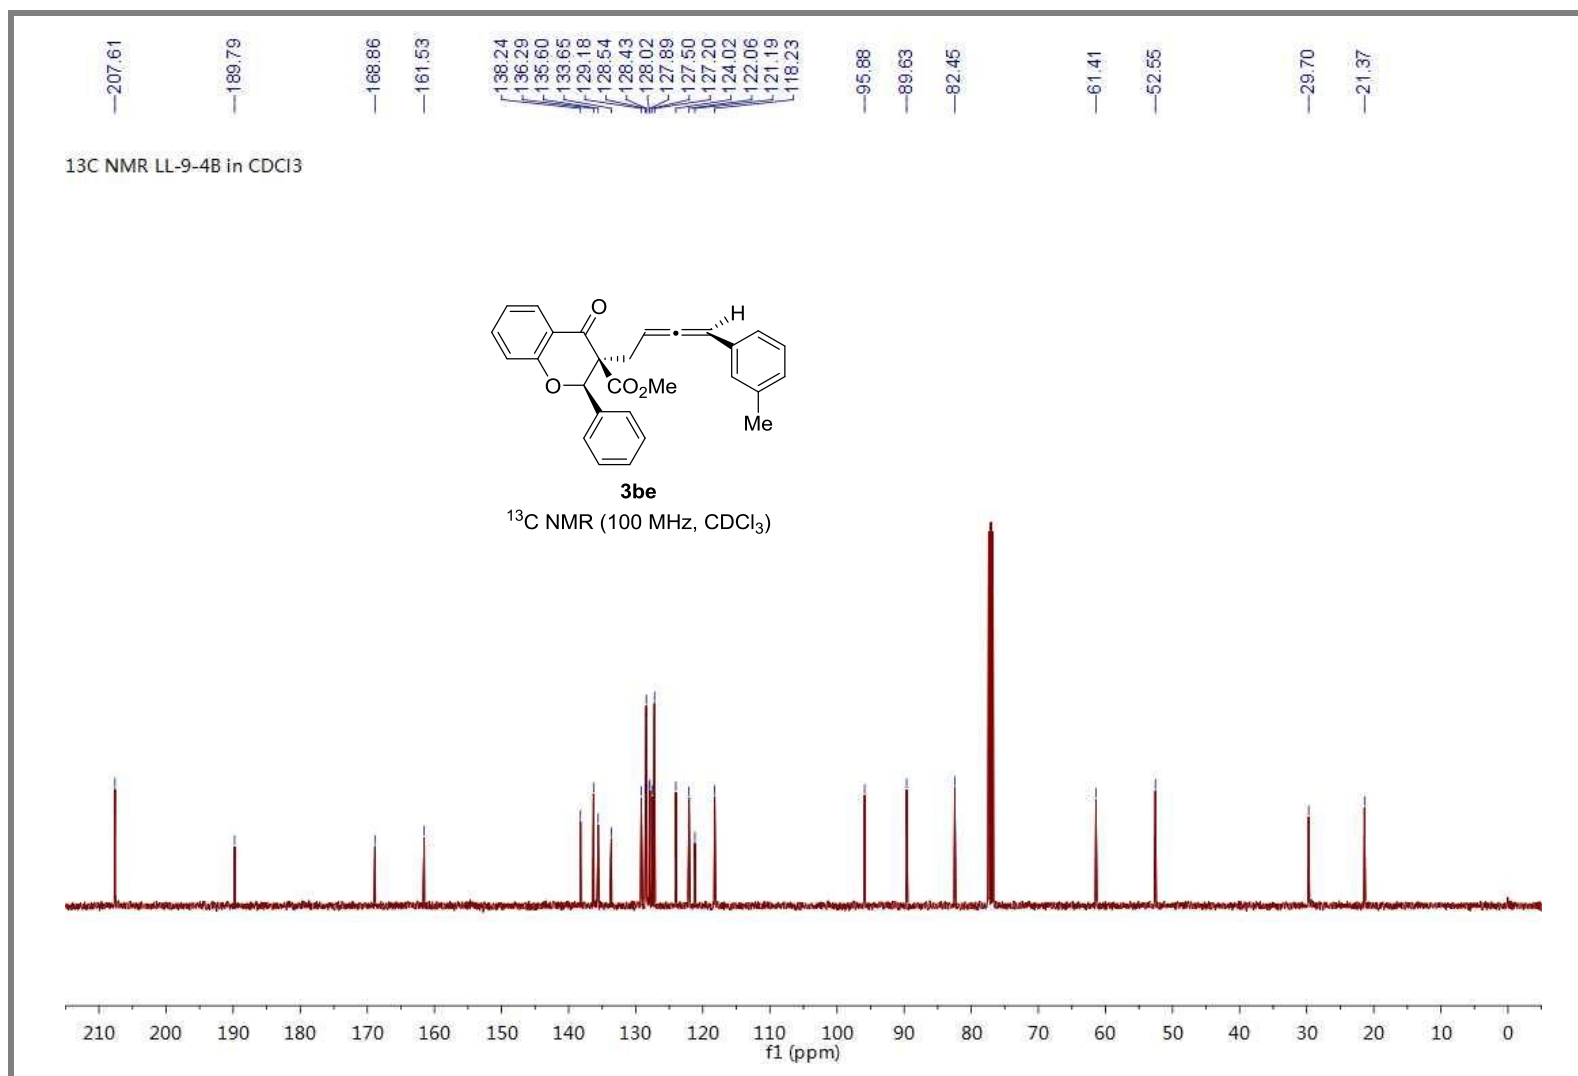

Data File C:\CHEM32\1\DATA\ZHOU-22\YZN020644.D  
 Sample Name: LL-9-4B +/-

=====  
 Acq. Operator :  
 Acq. Instrument : Instrument 1 Location : -  
 Injection Date : 2/26/2022 3:52:29 AM  
 Acq. Method : C:\CHEM32\1\METHODS\DEF\_LC.M  
 Last changed : 2/26/2022 3:50:34 AM  
 (modified after loading)  
 Analysis Method : C:\CHEM32\1\METHODS\DEF\_LC.M  
 Last changed : 2/26/2022 4:25:39 AM  
 (modified after loading)  
 Sample Info : OD-3, Hexane/i-PrOH = 97/3, 0.8 mL/min, 30 oC, 254 nm

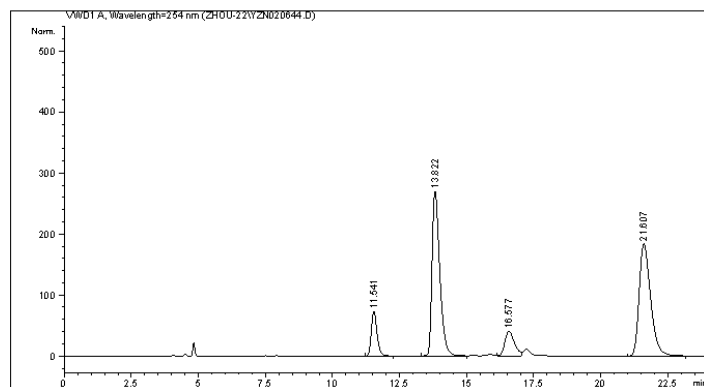

=====  
 Area Percent Report  
 =====

Sorted By : Signal  
 Multiplier: : 1.0000  
 Dilution: : 1.0000  
 Use Multiplier & Dilution Factor with ISTDs

Signal 1: WVD1 A, Wavelength=254 nm

| Peak # | RetTime [min] | Type | Width [min] | Area [mAU*s] | Height [mAU] | Area %  |
|--------|---------------|------|-------------|--------------|--------------|---------|
| 1      | 11.541        | BB   | 0.2279      | 1087.85034   | 72.92671     | 8.3751  |
| 2      | 13.822        | BB   | 0.3068      | 5418.80371   | 270.20404    | 41.7179 |
| 3      | 16.577        | VV   | 0.3780      | 1001.24353   | 40.60318     | 7.7083  |
| 4      | 21.607        | BB   | 0.4571      | 5481.26563   | 183.79692    | 42.1988 |

Totals : 1.29892e4 567.53085

=====  
 \*\*\* End of Report \*\*\*

Instrument 1 2/26/2022 4:25:44 AM

Page 1 of 1

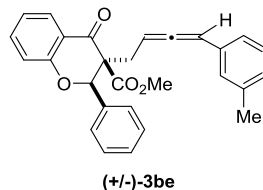

Data File C:\CHEM32\1\DATA\ZHOU-22\YZN020643.D  
 Sample Name: LL-9-4B

=====  
 Acq. Operator :  
 Acq. Instrument : Instrument 1 Location : -  
 Injection Date : 2/26/2022 3:25:59 AM  
 Acq. Method : C:\CHEM32\1\METHODS\DEF\_LC.M  
 Last changed : 2/26/2022 3:24:54 AM  
 (modified after loading)  
 Analysis Method : C:\CHEM32\1\METHODS\DEF\_LC.M  
 Last changed : 6/15/2022 7:50:32 AM  
 (modified after loading)  
 Sample Info : OD-3, Hexane/i-PrOH = 97/3, 0.8 mL/min, 30 oC, 254 nm

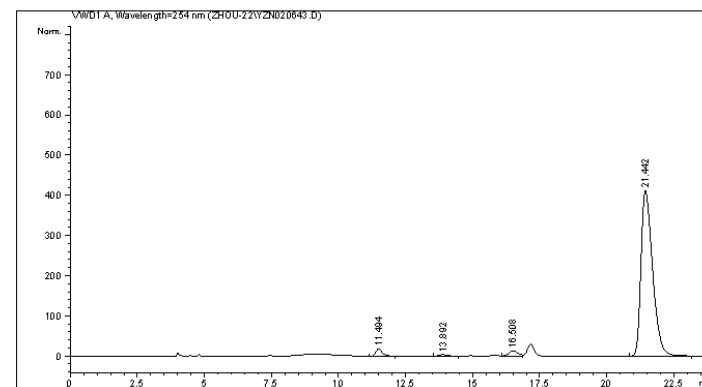

=====  
 Area Percent Report  
 =====

Sorted By : Signal  
 Multiplier: : 1.0000  
 Dilution: : 1.0000  
 Use Multiplier & Dilution Factor with ISTDs

Signal 1: WVD1 A, Wavelength=254 nm

| Peak # | RetTime [min] | Type | Width [min] | Area [mAU*s] | Height [mAU] | Area %  |
|--------|---------------|------|-------------|--------------|--------------|---------|
| 1      | 11.494        | VB   | 0.2387      | 281.79428    | 18.07372     | 2.1713  |
| 2      | 13.892        | BB   | 0.3105      | 70.44738     | 3.47928      | 0.5428  |
| 3      | 16.508        | VV   | 0.3752      | 298.75476    | 12.29424     | 2.3020  |
| 4      | 21.442        | BB   | 0.4605      | 1.23272e4    | 411.14001    | 94.9839 |

Totals : 1.29782e4 444.98725

=====  
 \*\*\* End of Report \*\*\*

Instrument 1 6/15/2022 7:50:49 AM

Page 1 of 1

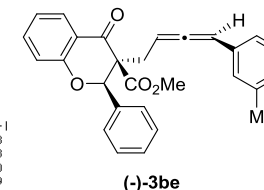

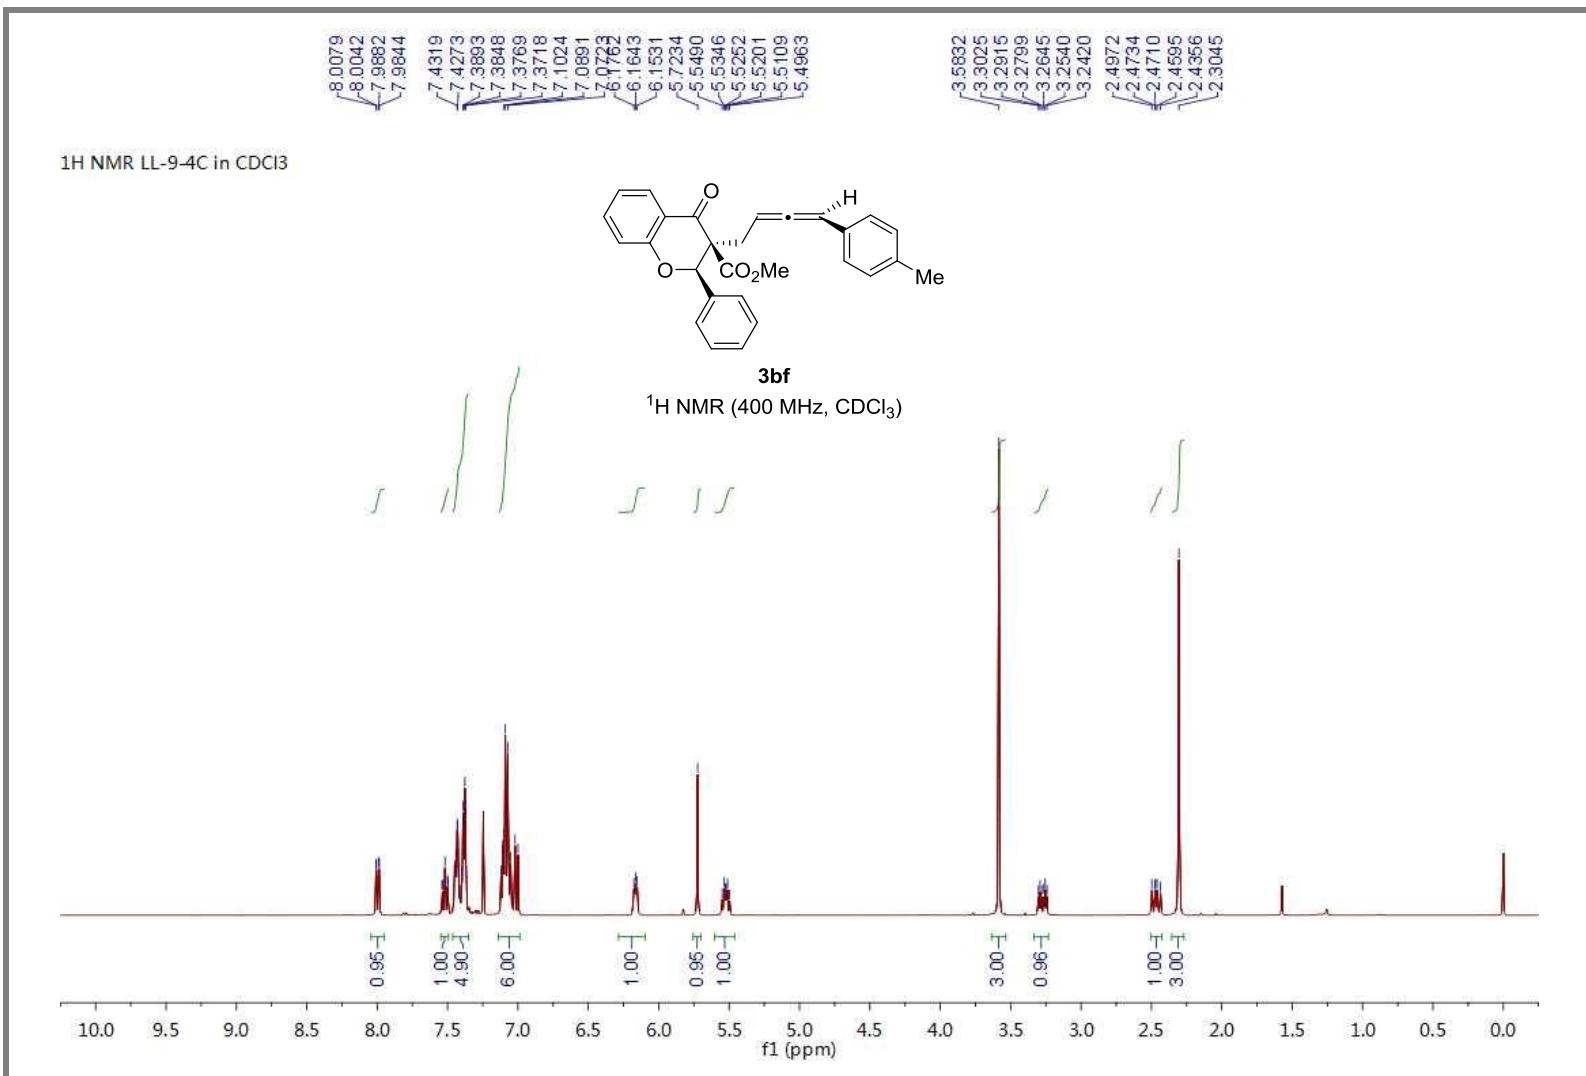

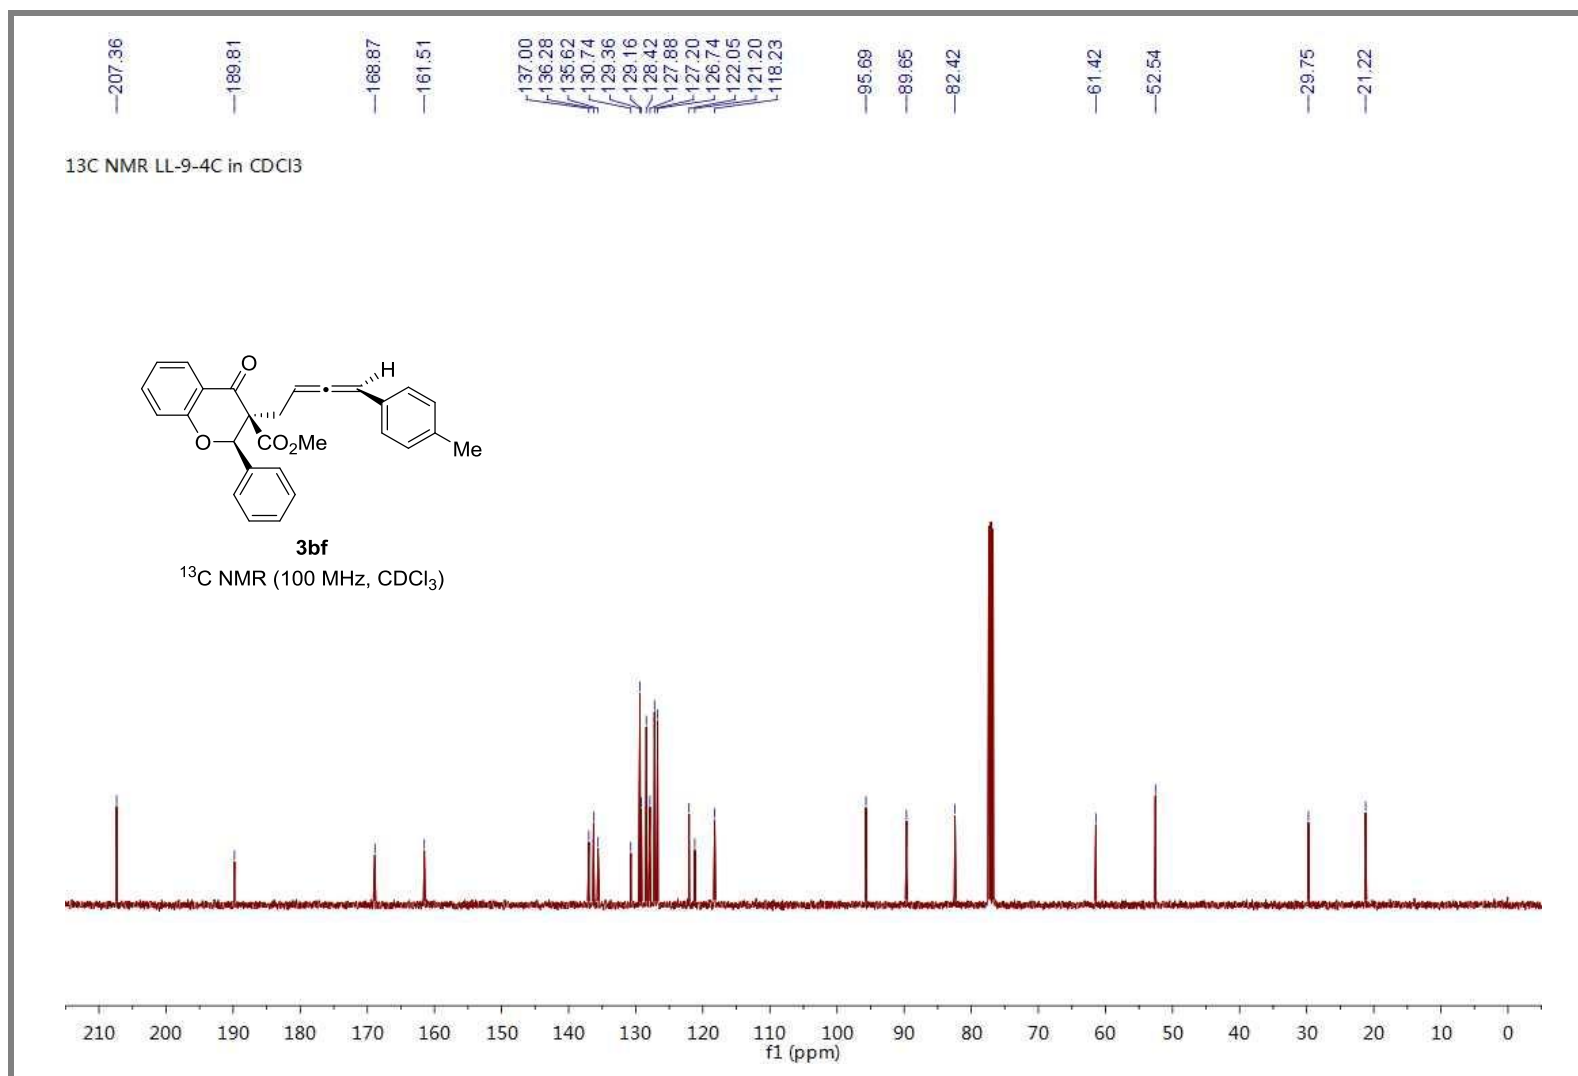

Data File C:\CHEM32\1\DATA\ZHOU-22\YZN020646.D  
 Sample Name: LL-9-4C +/-

=====  
 Acq. Operator :  
 Acq. Instrument : Instrument 1 Location : -  
 Injection Date : 2/26/2022 4:41:28 AM  
 Acq. Method : C:\CHEM32\1\METHODS\DEF\_LC.M  
 Last changed : 2/26/2022 4:40:22 AM  
 (modified after loading)  
 Analysis Method : C:\CHEM32\1\METHODS\DEF\_LC.M  
 Last changed : 2/26/2022 5:04:41 AM  
 (modified after loading)  
 Sample Info : OD-3, Hexane/i-PrOH = 97/3, 0.8 mL/min, 30 oC, 254 nm

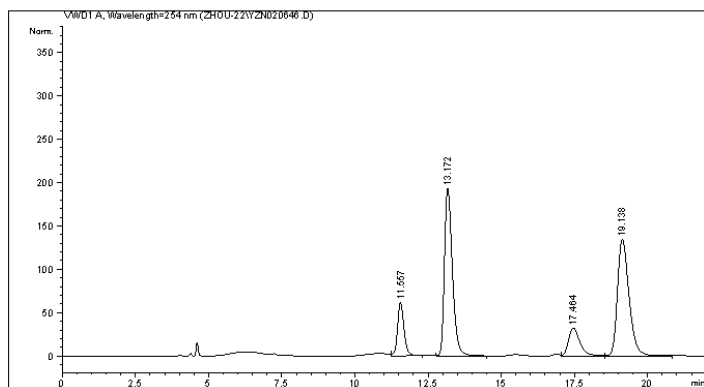

=====  
 Area Percent Report  
 =====

Sorted By : Signal  
 Multiplier: : 1.0000  
 Dilution: : 1.0000  
 Use Multiplier & Dilution Factor with ISTDs

Signal 1: WVD1 A, Wavelength=254 nm

| Peak # | RetTime [min] | Type | Width [min] | Area mAU   | Height *s [mAU] | Area %  |
|--------|---------------|------|-------------|------------|-----------------|---------|
| 1      | 11.557        | VB   | 0.2326      | 941.12762  | 61.42798        | 10.3031 |
| 2      | 13.172        | BB   | 0.2898      | 3635.43457 | 192.83620       | 39.7995 |
| 3      | 17.464        | VV   | 0.4106      | 874.47797  | 32.44318        | 9.5735  |
| 4      | 19.138        | VB   | 0.4216      | 3683.33350 | 134.44211       | 40.3239 |

Totals : 9134.37366 421.14947

=====  
 \*\*\* End of Report \*\*\*

Instrument 1 2/26/2022 5:04:43 AM

Page 1 of 1

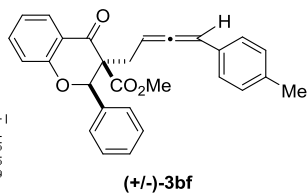

Data File C:\CHEM32\1\DATA\ZHOU-22\YZN020645.D  
 Sample Name: LL-9-4C

=====  
 Acq. Operator :  
 Acq. Instrument : Instrument 1 Location : -  
 Injection Date : 2/26/2022 4:17:56 AM  
 Acq. Method : C:\CHEM32\1\METHODS\DEF\_LC.M  
 Last changed : 2/26/2022 4:17:13 AM  
 (modified after loading)  
 Analysis Method : C:\CHEM32\1\METHODS\DEF\_LC.M  
 Last changed : 6/15/2022 7:54:09 AM  
 (modified after loading)  
 Sample Info : OD-3, Hexane/i-PrOH = 97/3, 0.8 mL/min, 30 oC, 254 nm

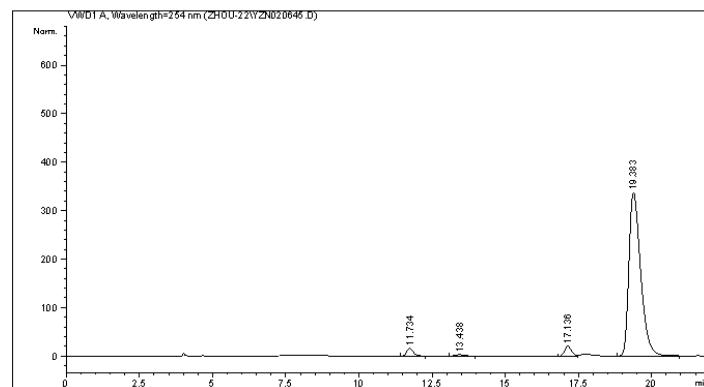

=====  
 Area Percent Report  
 =====

Sorted By : Signal  
 Multiplier: : 1.0000  
 Dilution: : 1.0000  
 Use Multiplier & Dilution Factor with ISTDs

Signal 1: WVD1 A, Wavelength=254 nm

| Peak # | RetTime [min] | Type | Width [min] | Area mAU   | Height *s [mAU] | Area %  |
|--------|---------------|------|-------------|------------|-----------------|---------|
| 1      | 11.734        | BB   | 0.2321      | 245.99806  | 16.23227        | 2.4633  |
| 2      | 13.438        | BB   | 0.2959      | 57.65097   | 2.97564         | 0.5773  |
| 3      | 17.136        | BV   | 0.2537      | 330.85602  | 20.20274        | 3.3130  |
| 4      | 19.383        | BB   | 0.4253      | 9352.09570 | 337.43399       | 93.6464 |

Totals : 9986.60075 376.84464

=====  
 \*\*\* End of Report \*\*\*

Instrument 1 6/15/2022 7:54:12 AM

Page 1 of 1

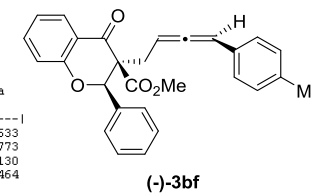



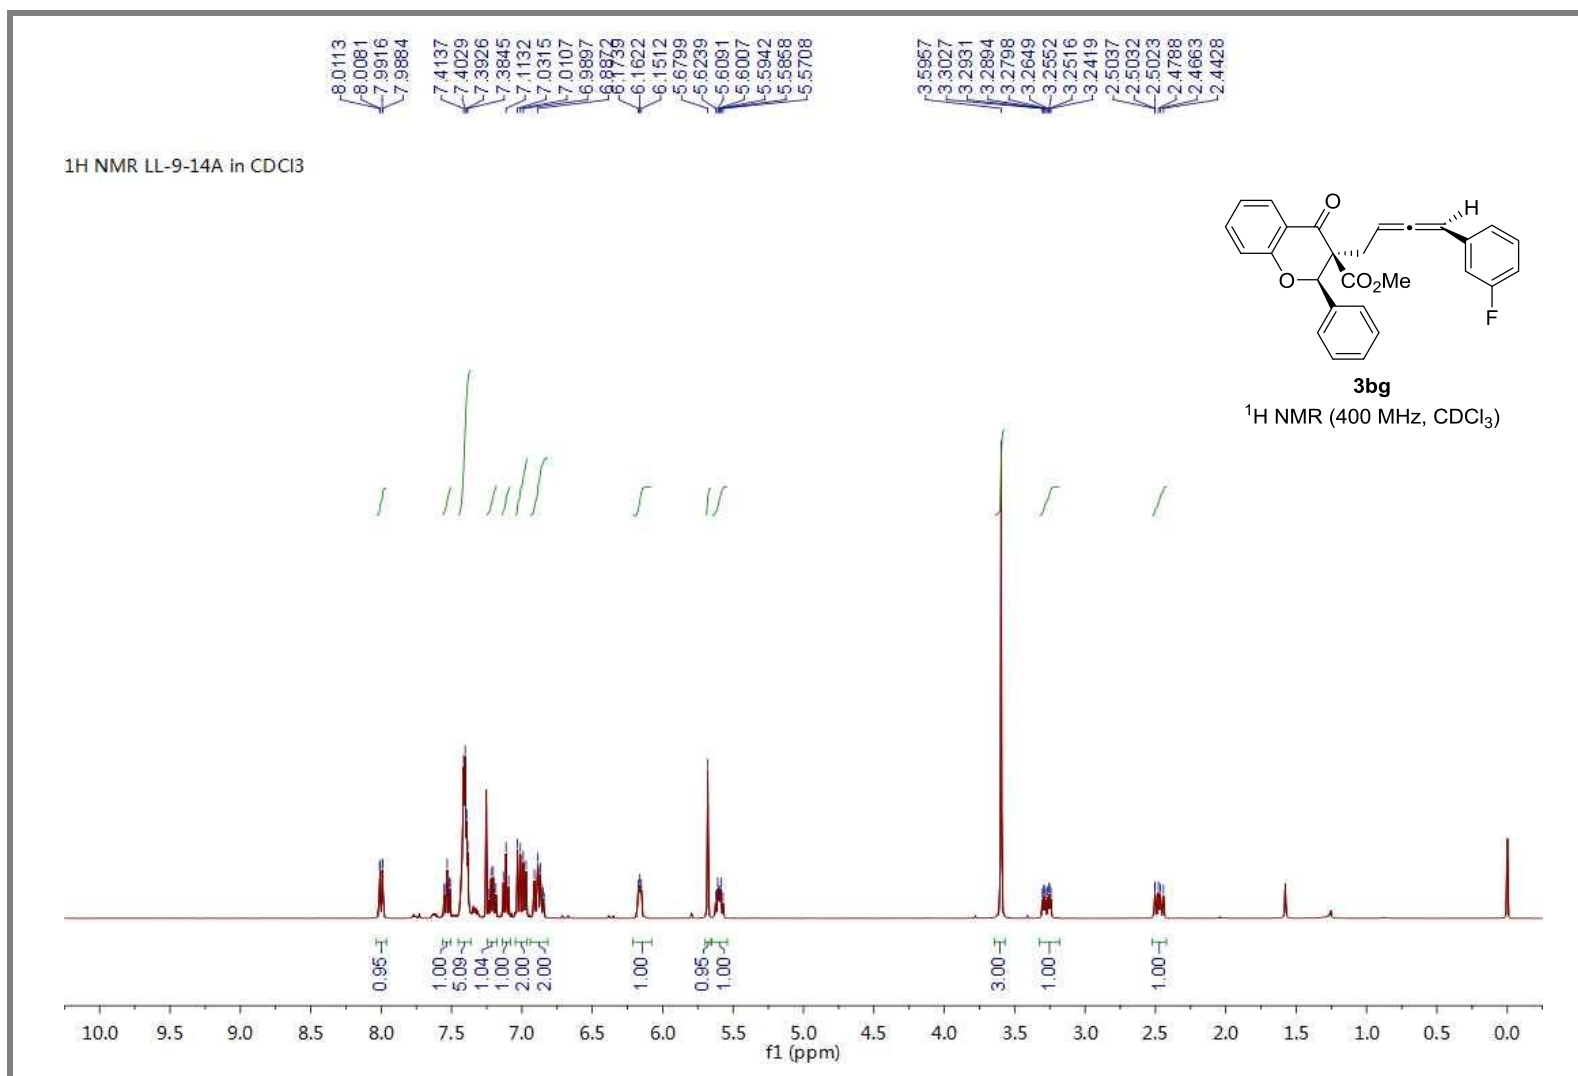

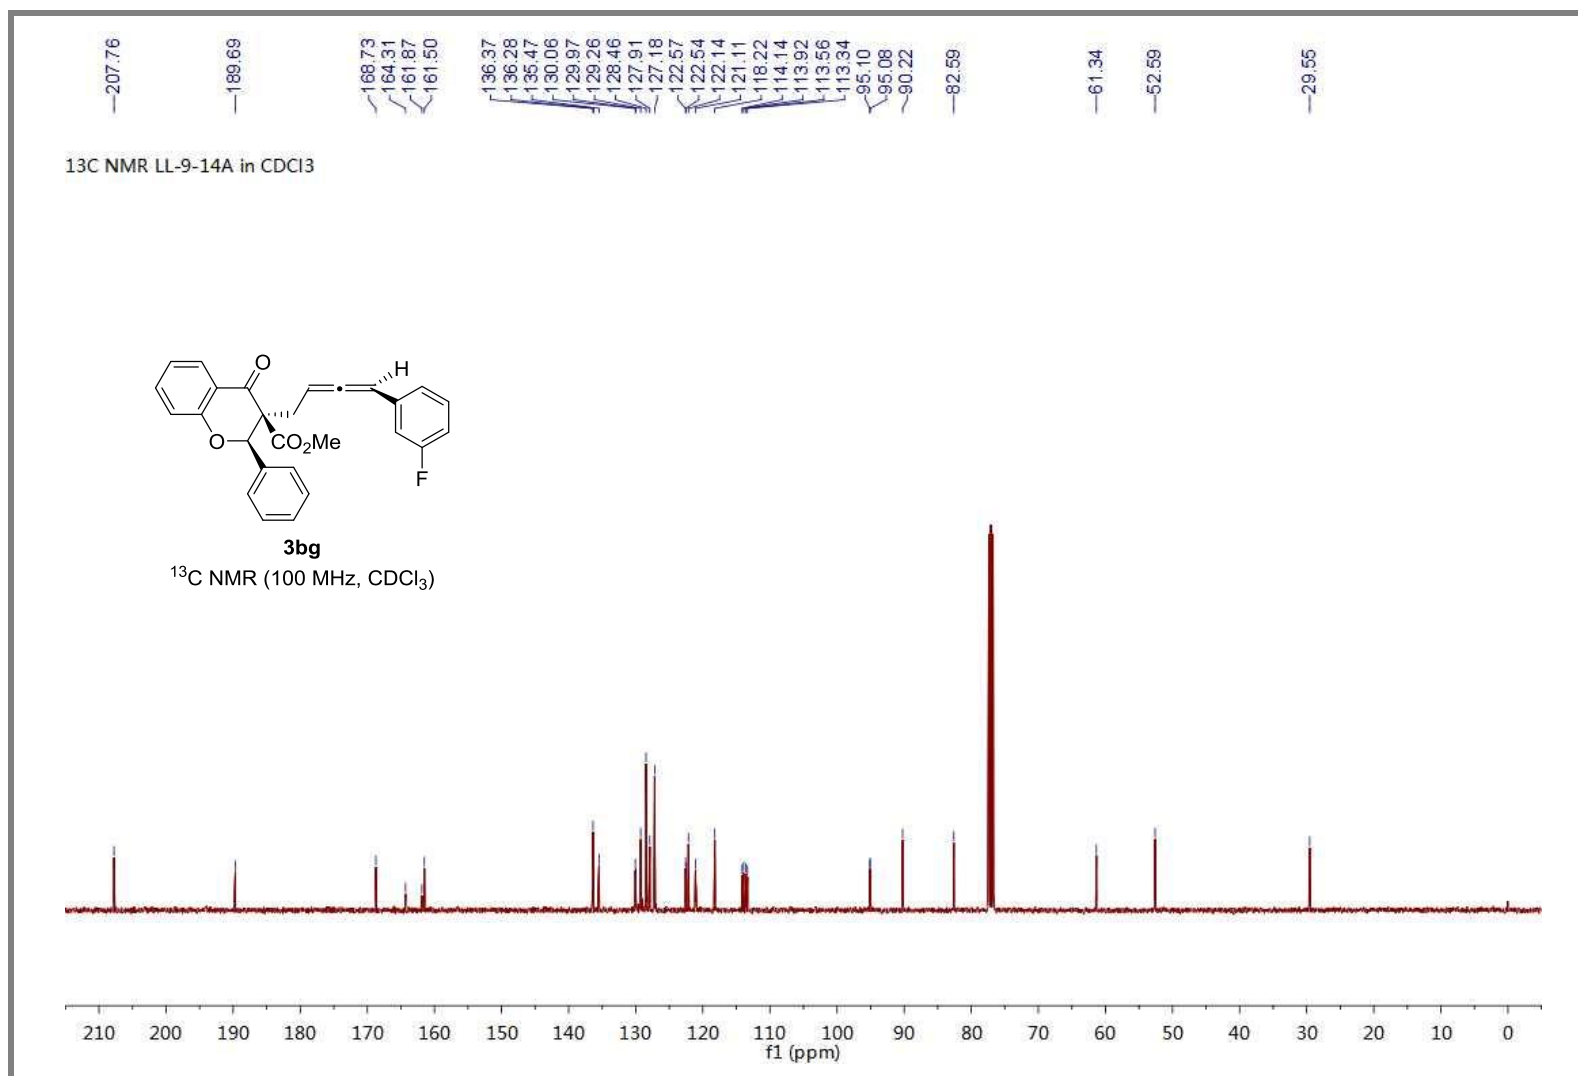

<sup>19</sup>F NMR LL-9-14A in CDCl<sub>3</sub>

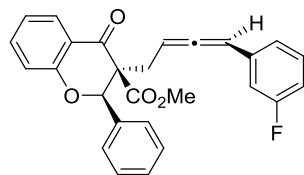

**3bg**

<sup>19</sup>F NMR (376 MHz, CDCl<sub>3</sub>)

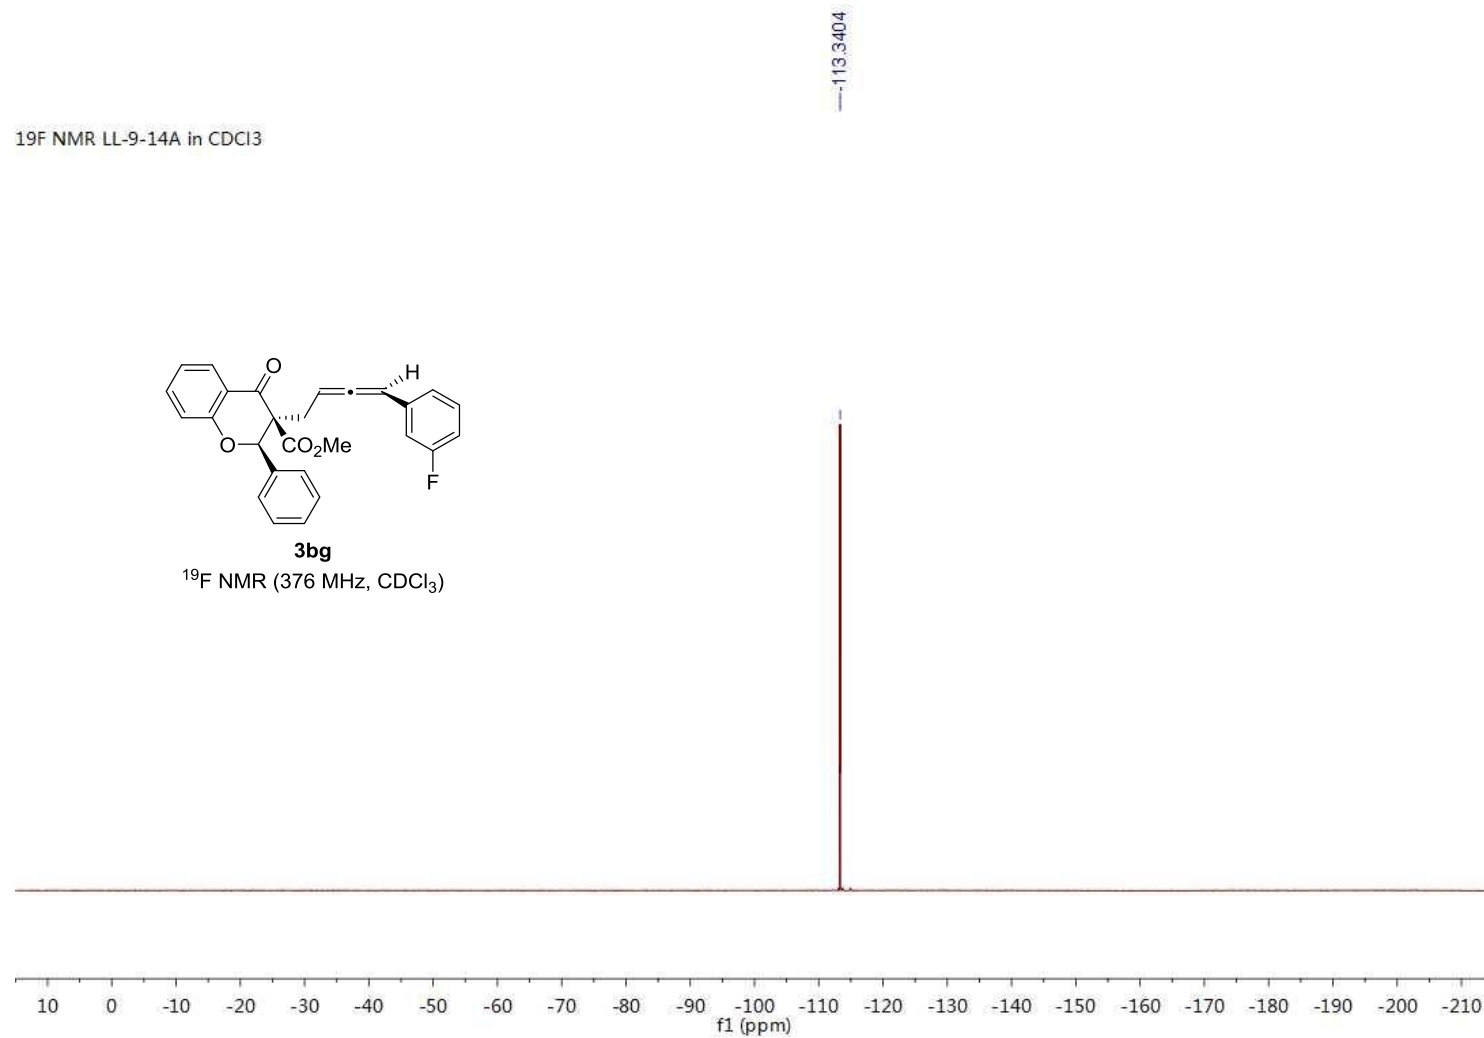

Data File C:\CHEM32\1\DATA\ZHOU-22\YZN020734.D  
 Sample Name: LL-9-14A +/-

=====  
 Acq. Operator :  
 Acq. Instrument : Instrument 1 Location : -  
 Injection Date : 3/10/2022 9:39:24 PM  
 Acq. Method : C:\CHEM32\1\METHODS\DEF\_LC.M  
 Last changed : 3/10/2022 9:20:39 PM  
 (modified after loading)  
 Analysis Method : C:\CHEM32\1\METHODS\DEF\_LC.M  
 Last changed : 3/10/2022 10:45:50 PM  
 (modified after loading)  
 Sample Info : IC, Hexane/i-PrOH = 98/2, 1.0 mL/min, 30 oC, 254 nm

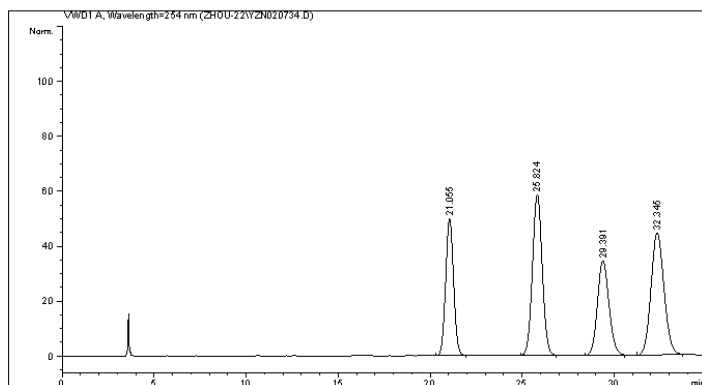

=====  
 Area Percent Report  
 =====

Sorted By : Signal  
 Multiplier: : 1.0000  
 Dilution: : 1.0000  
 Use Multiplier & Dilution Factor with ISTDs

Signal 1: VWD1 A, Wavelength=254 nm

| Peak # | RetTime [min] | Type | Width [min] | Area [mAU*s] | Height [mAU] | Area %  |
|--------|---------------|------|-------------|--------------|--------------|---------|
| 1      | 21.055        | BB   | 0.4605      | 1489.24036   | 49.87651     | 20.2912 |
| 2      | 25.824        | BB   | 0.5754      | 2167.15796   | 58.62949     | 29.5280 |
| 3      | 29.391        | BB   | 0.6744      | 1502.19189   | 34.37493     | 20.4677 |
| 4      | 32.345        | BB   | 0.7521      | 2180.73877   | 44.51692     | 29.7131 |

Totals : 7339.32898 187.39785

=====  
 \*\*\* End of Report \*\*\*

Instrument 1 3/10/2022 10:45:58 PM

Page 1 of 1

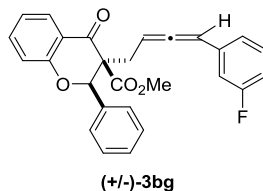

Data File C:\CHEM32\1\DATA\ZHOU-22\YZN020709.D  
 Sample Name: LL-9-14 A

=====  
 Acq. Operator :  
 Acq. Instrument : Instrument 1 Location : -  
 Injection Date : 3/9/2022 4:27:35 AM  
 Acq. Method : C:\CHEM32\1\METHODS\DEF\_LC.M  
 Last changed : 3/9/2022 4:24:51 AM  
 (modified after loading)  
 Analysis Method : C:\CHEM32\1\METHODS\DEF\_LC.M  
 Last changed : 6/15/2022 4:59:16 AM  
 (modified after loading)  
 Sample Info : IC, Hexane/i-PrOH = 98/2, 1.0 mL/min, 30 oC, 254 nm

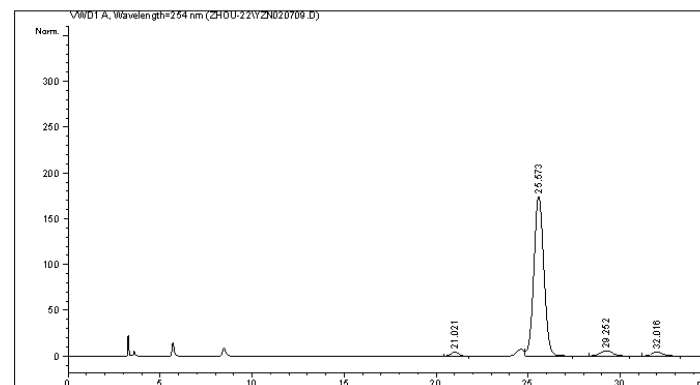

=====  
 Area Percent Report  
 =====

Sorted By : Signal  
 Multiplier: : 1.0000  
 Dilution: : 1.0000  
 Use Multiplier & Dilution Factor with ISTDs

Signal 1: VWD1 A, Wavelength=254 nm

| Peak # | RetTime [min] | Type | Width [min] | Area [mAU*s] | Height [mAU] | Area %  |
|--------|---------------|------|-------------|--------------|--------------|---------|
| 1      | 21.021        | BB   | 0.4359      | 126.30781    | 4.53140      | 1.7663  |
| 2      | 25.573        | VB   | 0.5850      | 6576.21143   | 174.61166    | 91.9627 |
| 3      | 29.252        | BB   | 0.7254      | 267.64407    | 5.79272      | 3.7428  |
| 4      | 32.016        | BB   | 0.6045      | 180.79289    | 4.53857      | 2.5282  |

Totals : 7150.95620 189.47435

=====  
 \*\*\* End of Report \*\*\*

Instrument 1 6/15/2022 4:59:23 AM

Page 1 of 1

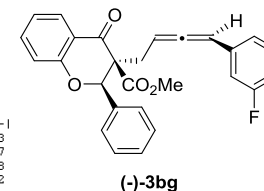

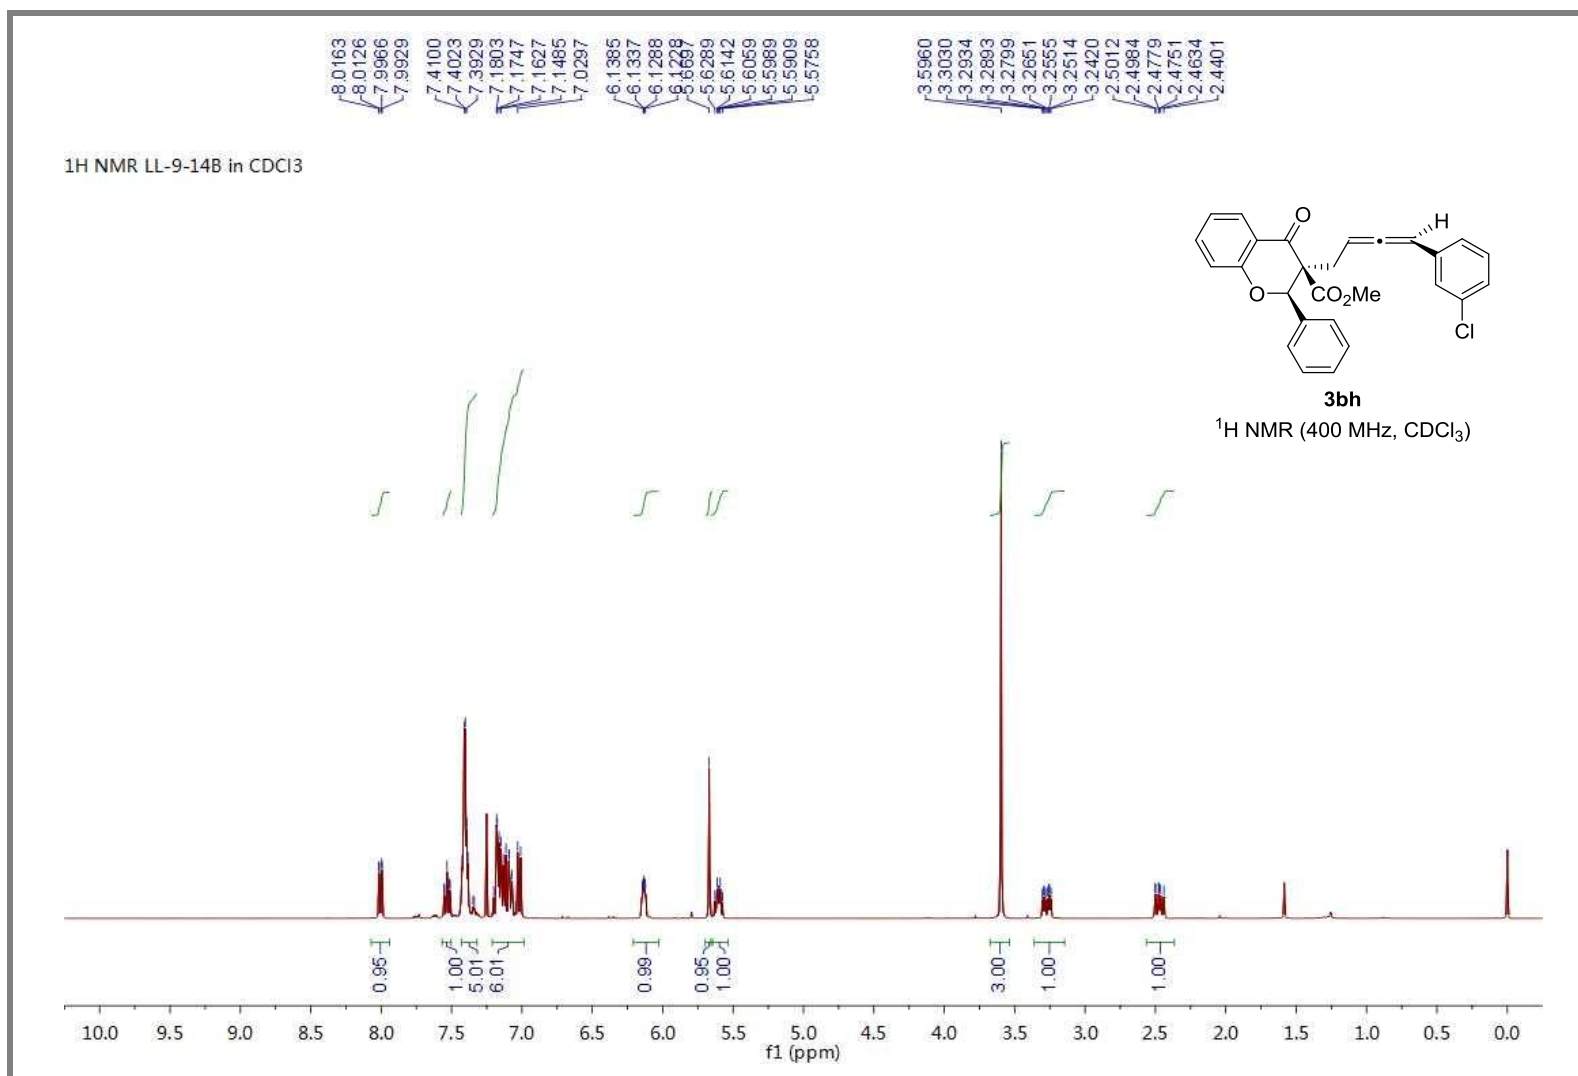

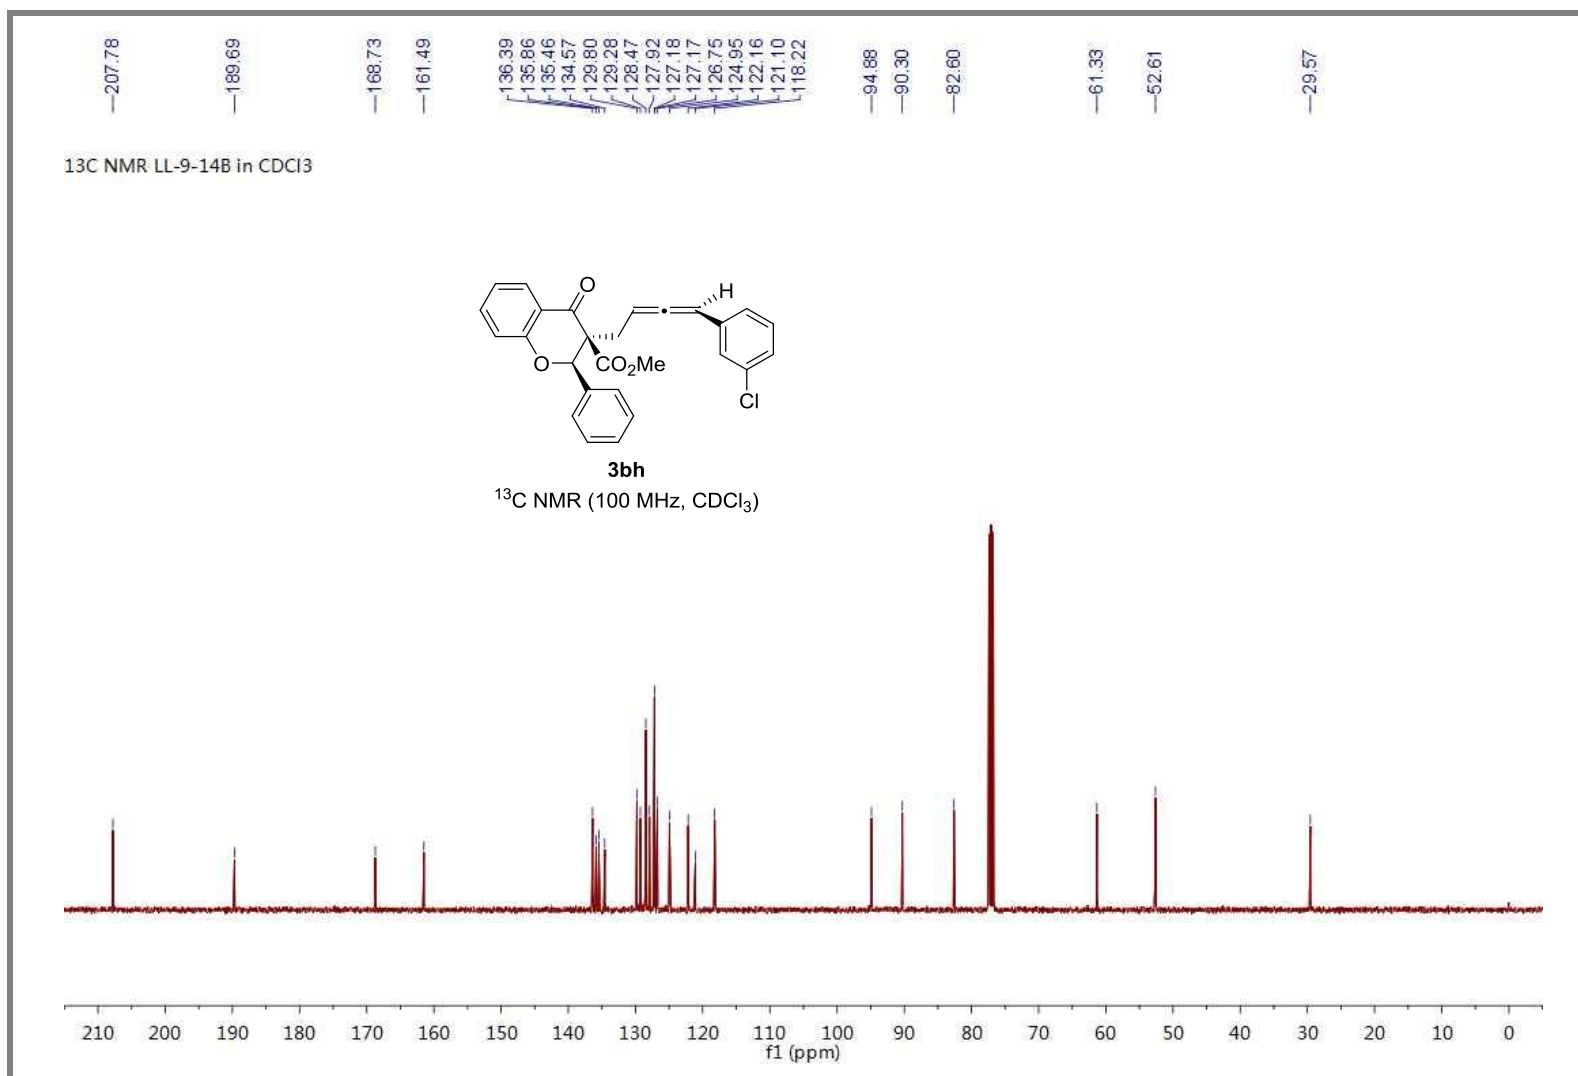

Data File C:\CHEM32\1\DATA\ZHOU-22\YZN020727.D  
 Sample Name: LL-9-14B +/- (11)

=====  
 Acq. Operator :  
 Acq. Instrument : Instrument 1 Location : -  
 Injection Date : 3/10/2022 4:12:39 AM  
 Acq. Method : C:\CHEM32\1\METHODS\DEF\_LC.M  
 Last changed : 3/10/2022 3:54:50 AM  
 (modified after loading)  
 Analysis Method : C:\CHEM32\1\METHODS\DEF\_LC.M  
 Last changed : 3/10/2022 8:41:23 AM  
 (modified after loading)  
 Sample Info : IC, Hexane/i-PrOH = 96.5/3.5, 1.0 mL/min, 30 oC, 254 nm

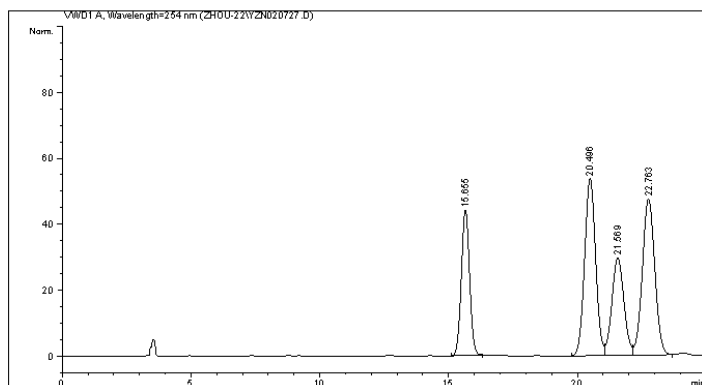

=====  
 Area Percent Report  
 =====

Sorted By : Signal  
 Multiplier: : 1.0000  
 Dilution: : 1.0000  
 Use Multiplier & Dilution Factor with ISTDs

Signal 1: WVD1 A, Wavelength=254 nm

| Peak # | RetTime [min] | Type | Width [min] | Area [mAU] | Height [mAU] | Area %  |
|--------|---------------|------|-------------|------------|--------------|---------|
| 1      | 15.655        | BB   | 0.3470      | 980.72534  | 44.05423     | 19.0929 |
| 2      | 20.496        | BV   | 0.4622      | 1599.76135 | 53.76189     | 31.1444 |
| 3      | 21.569        | VV   | 0.5027      | 963.63342  | 29.66976     | 18.7601 |
| 4      | 22.763        | VB   | 0.5233      | 1592.47852 | 47.36810     | 31.0026 |

Totals : 5136.59863 174.86398

=====  
 \*\*\* End of Report \*\*\*

Instrument 1 3/10/2022 8:41:31 AM

Page 1 of 1

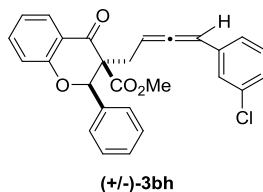

Data File C:\CHEM32\1\DATA\ZHOU-22\YZN020729.D  
 Sample Name: LL-9-14B

=====  
 Acq. Operator :  
 Acq. Instrument : Instrument 1 Location : -  
 Injection Date : 3/10/2022 7:24:27 AM  
 Acq. Method : C:\CHEM32\1\METHODS\DEF\_LC.M  
 Last changed : 3/10/2022 7:23:31 AM  
 (modified after loading)  
 Analysis Method : C:\CHEM32\1\METHODS\DEF\_LC.M  
 Last changed : 6/15/2022 5:01:41 AM  
 (modified after loading)  
 Sample Info : IC, Hexane/i-PrOH = 96.5/3.5, 1.0 mL/min, 30 oC, 254 nm

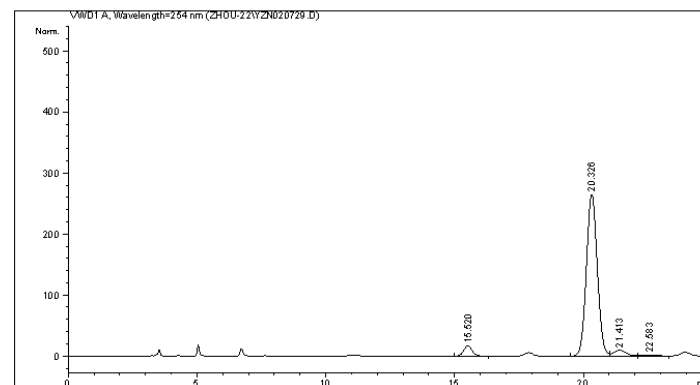

=====  
 Area Percent Report  
 =====

Sorted By : Signal  
 Multiplier: : 1.0000  
 Dilution: : 1.0000  
 Use Multiplier & Dilution Factor with ISTDs

Signal 1: WVD1 A, Wavelength=254 nm

| Peak # | RetTime [min] | Type | Width [min] | Area [mAU] | Height [mAU] | Area %  |
|--------|---------------|------|-------------|------------|--------------|---------|
| 1      | 15.520        | BB   | 0.3452      | 369.87930  | 16.73534     | 4.3393  |
| 2      | 20.326        | BV   | 0.4562      | 7788.28125 | 265.19955    | 91.3689 |
| 3      | 21.413        | VV   | 0.5009      | 303.66852  | 9.28656      | 3.5625  |
| 4      | 22.583        | VV   | 0.5328      | 62.16397   | 1.81847      | 0.7293  |

Totals : 8523.99304 293.03992

=====  
 \*\*\* End of Report \*\*\*

Instrument 1 6/15/2022 5:01:55 AM

Page 1 of 1

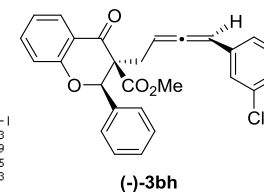

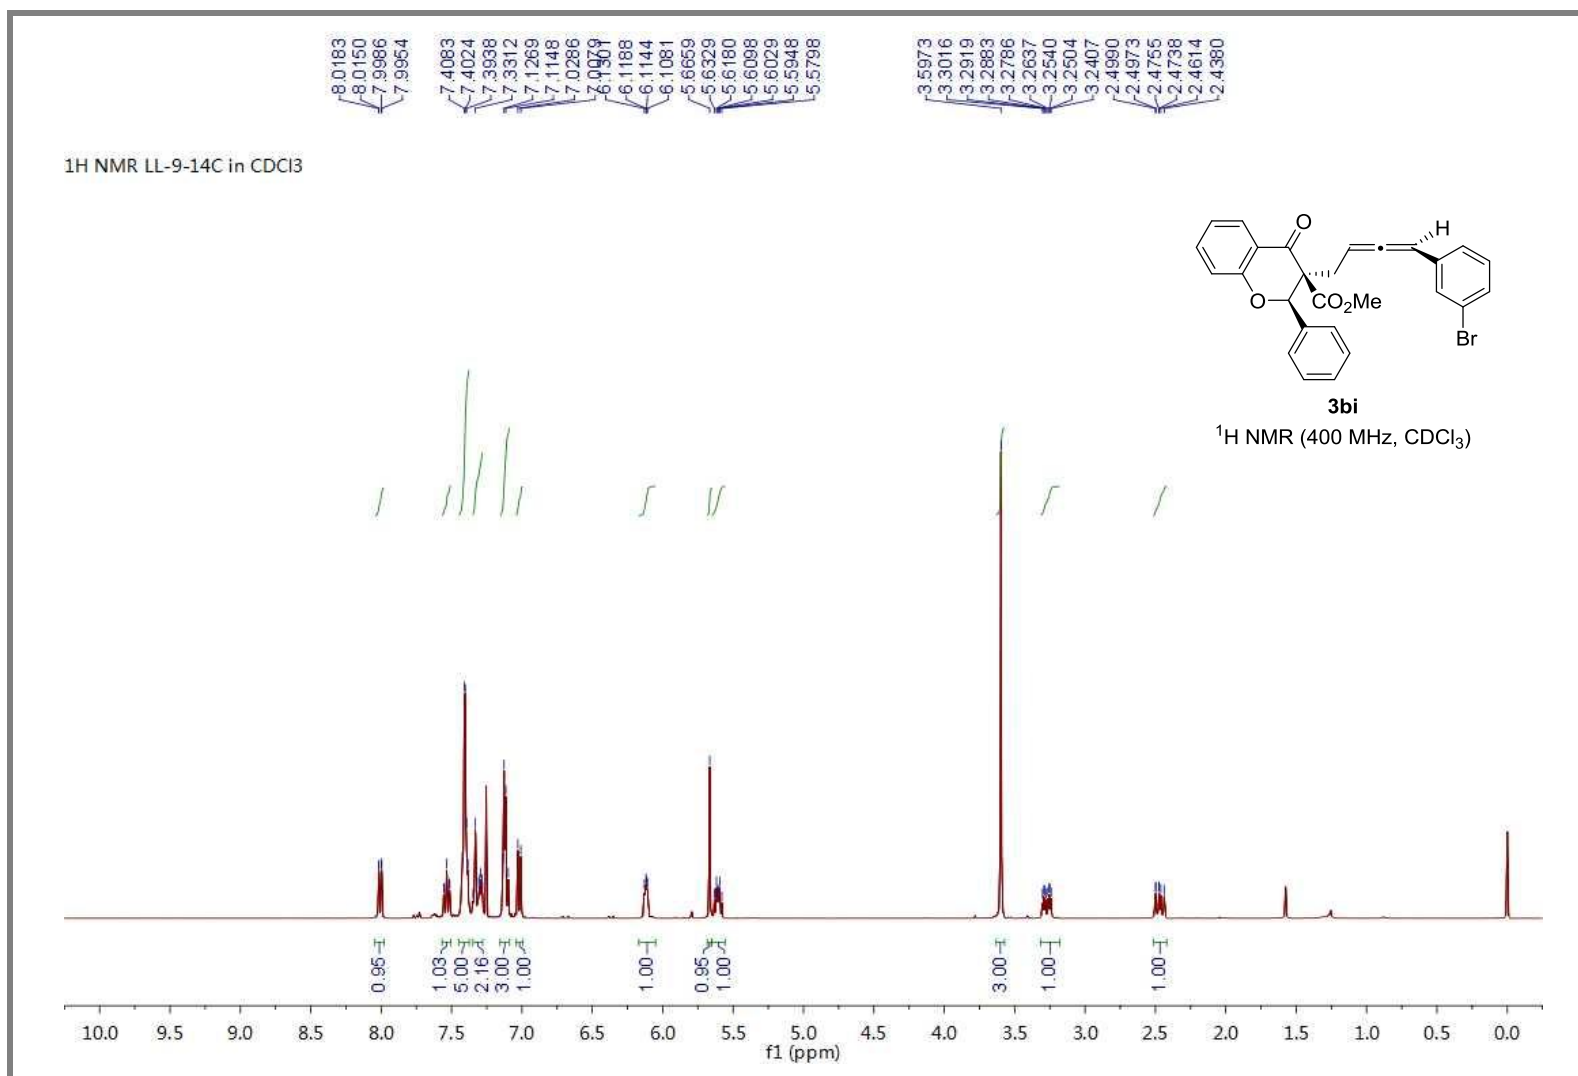



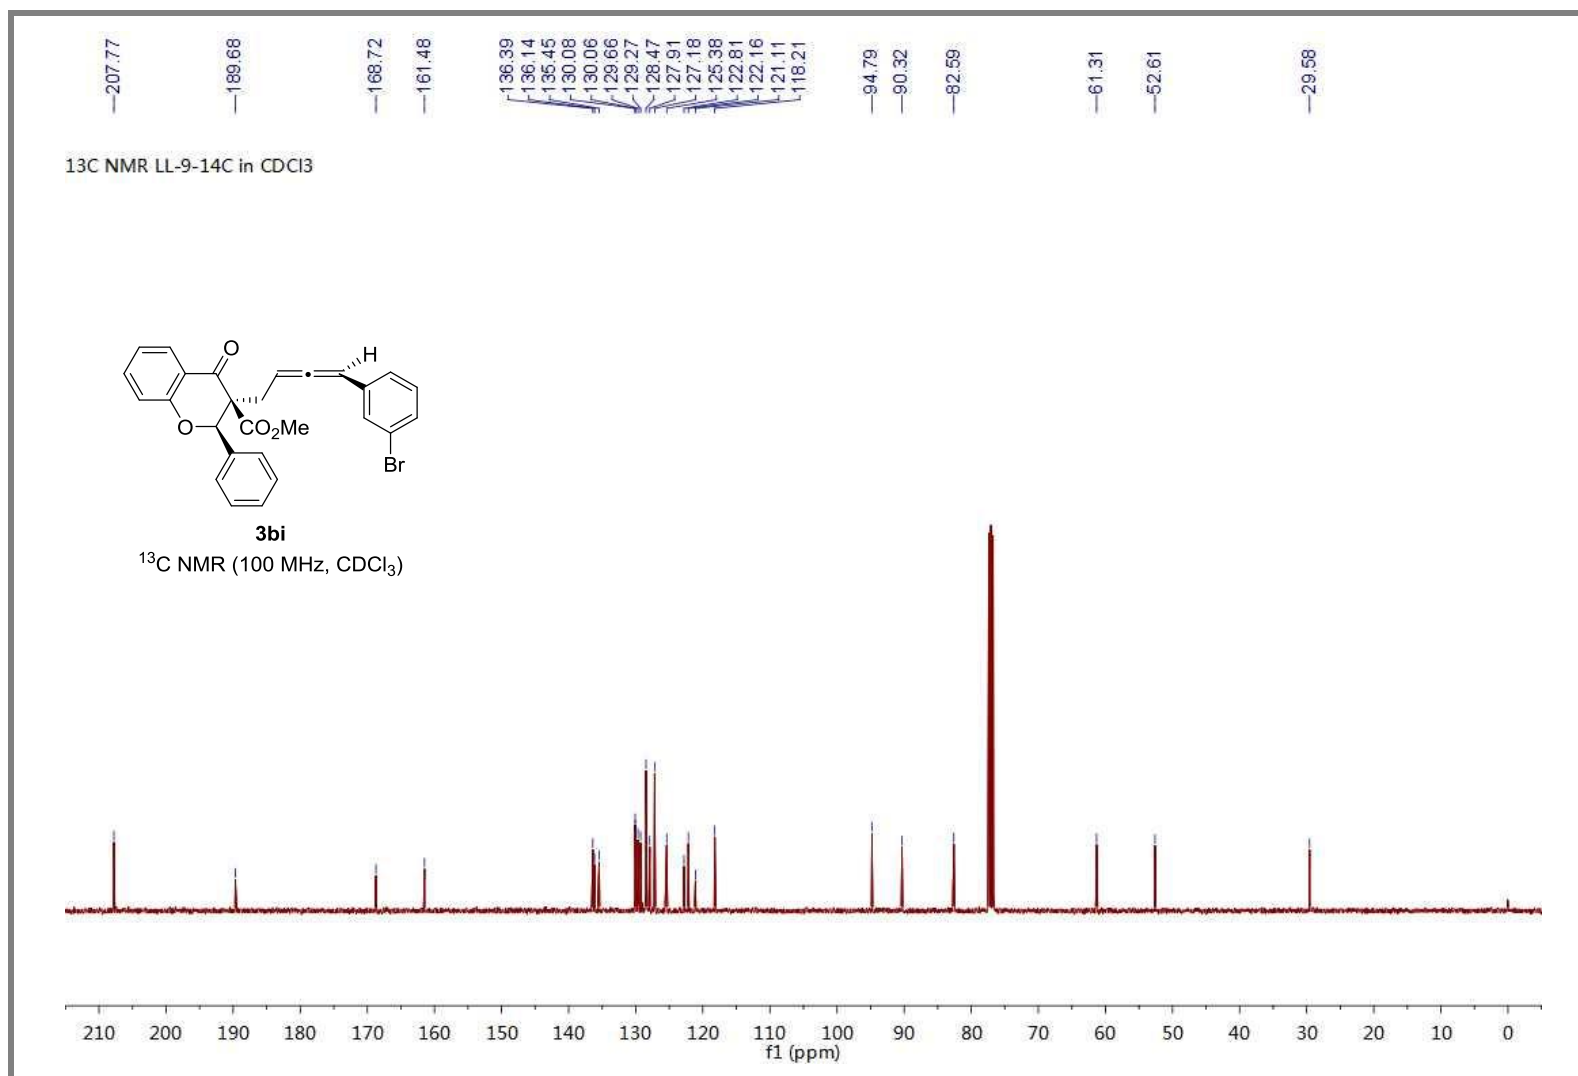

Data File C:\CHEM32\1\DATA\ZHOU-22\YZN020742.D  
 Sample Name: LL-9-14C +/-

=====  
 Acq. Operator :  
 Acq. Instrument : Instrument 1 Location : -  
 Injection Date : 3/11/2022 10:15:34 PM  
 Acq. Method : C:\CHEM32\1\METHODS\DEF\_LC.M  
 Last changed : 3/11/2022 9:38:00 PM  
 (modified after loading)  
 Analysis Method : C:\CHEM32\1\METHODS\DEF\_LC.M  
 Last changed : 3/12/2022 3:01:50 AM  
 (modified after loading)  
 Sample Info : AS-H\*2, Hexane/i-PrOH = 97/3, 0.7 mL/min, 30 oC, 254 nm

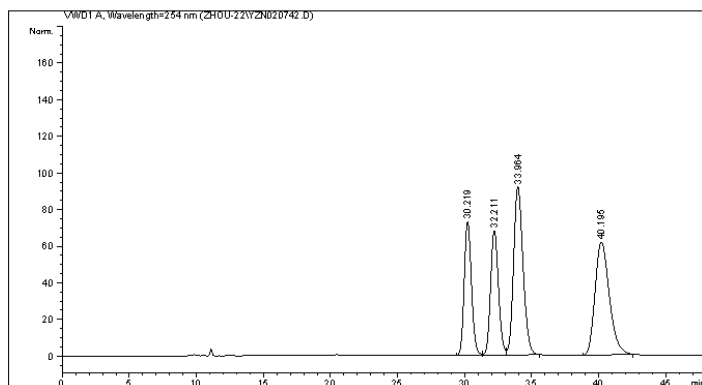

=====  
 Area Percent Report  
 =====

Sorted By : Signal  
 Multiplier: : 1.0000  
 Dilution: : 1.0000  
 Use Multiplier & Dilution Factor with ISTDs

Signal 1: VWD1 A, Wavelength=254 nm

| Peak # | RetTime [min] | Type | Width [min] | Area [mAU*s] | Height [mAU] | Area %  |
|--------|---------------|------|-------------|--------------|--------------|---------|
| 1      | 30.219        | BB   | 0.5790      | 2731.96191   | 72.80563     | 18.7275 |
| 2      | 32.211        | BV   | 0.6321      | 2785.74146   | 68.03014     | 19.0961 |
| 3      | 33.964        | VB   | 0.7554      | 4497.72119   | 91.73990     | 30.8317 |
| 4      | 40.195        | BB   | 1.1143      | 4572.56738   | 61.75148     | 31.3447 |

Totals : 1.45880e4 294.32714

=====  
 \*\*\* End of Report \*\*\*

Instrument 1 3/12/2022 3:01:56 AM

Page 1 of 1

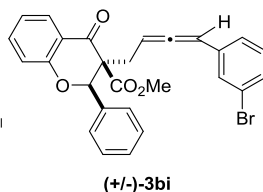

Data File C:\CHEM32\1\DATA\ZHOU-22\YZN020743.D  
 Sample Name: LL-9-14C

=====  
 Acq. Operator :  
 Acq. Instrument : Instrument 1 Location : -  
 Injection Date : 3/11/2022 11:30:09 PM  
 Acq. Method : C:\CHEM32\1\METHODS\DEF\_LC.M  
 Last changed : 3/11/2022 11:04:16 PM  
 (modified after loading)  
 Analysis Method : C:\CHEM32\1\METHODS\DEF\_LC.M  
 Last changed : 6/15/2022 5:04:47 AM  
 (modified after loading)  
 Sample Info : AS-H\*2, Hexane/i-PrOH = 97/3, 0.7 mL/min, 30 oC, 254 nm

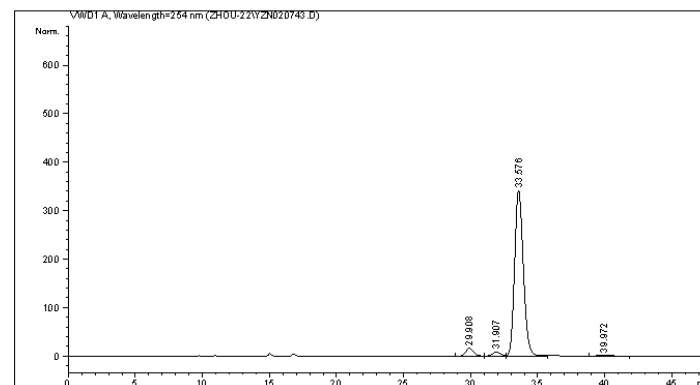

=====  
 Area Percent Report  
 =====

Sorted By : Signal  
 Multiplier: : 1.0000  
 Dilution: : 1.0000  
 Use Multiplier & Dilution Factor with ISTDs

Signal 1: VWD1 A, Wavelength=254 nm

| Peak # | RetTime [min] | Type | Width [min] | Area [mAU*s] | Height [mAU] | Area %  |
|--------|---------------|------|-------------|--------------|--------------|---------|
| 1      | 29.908        | BV   | 0.6071      | 623.25531    | 15.95604     | 3.7716  |
| 2      | 31.907        | VV   | 0.6471      | 328.42636    | 7.82199      | 1.9875  |
| 3      | 33.976        | VV   | 0.7003      | 1.54821e4    | 341.74258    | 93.6888 |
| 4      | 39.972        | BB   | 0.9205      | 91.24649     | 1.26014      | 0.5522  |

Totals : 1.65250e4 366.78075

=====  
 \*\*\* End of Report \*\*\*

Instrument 1 6/15/2022 5:04:53 AM

Page 1 of 1

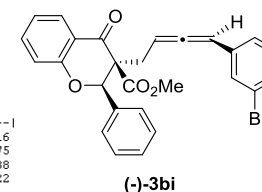

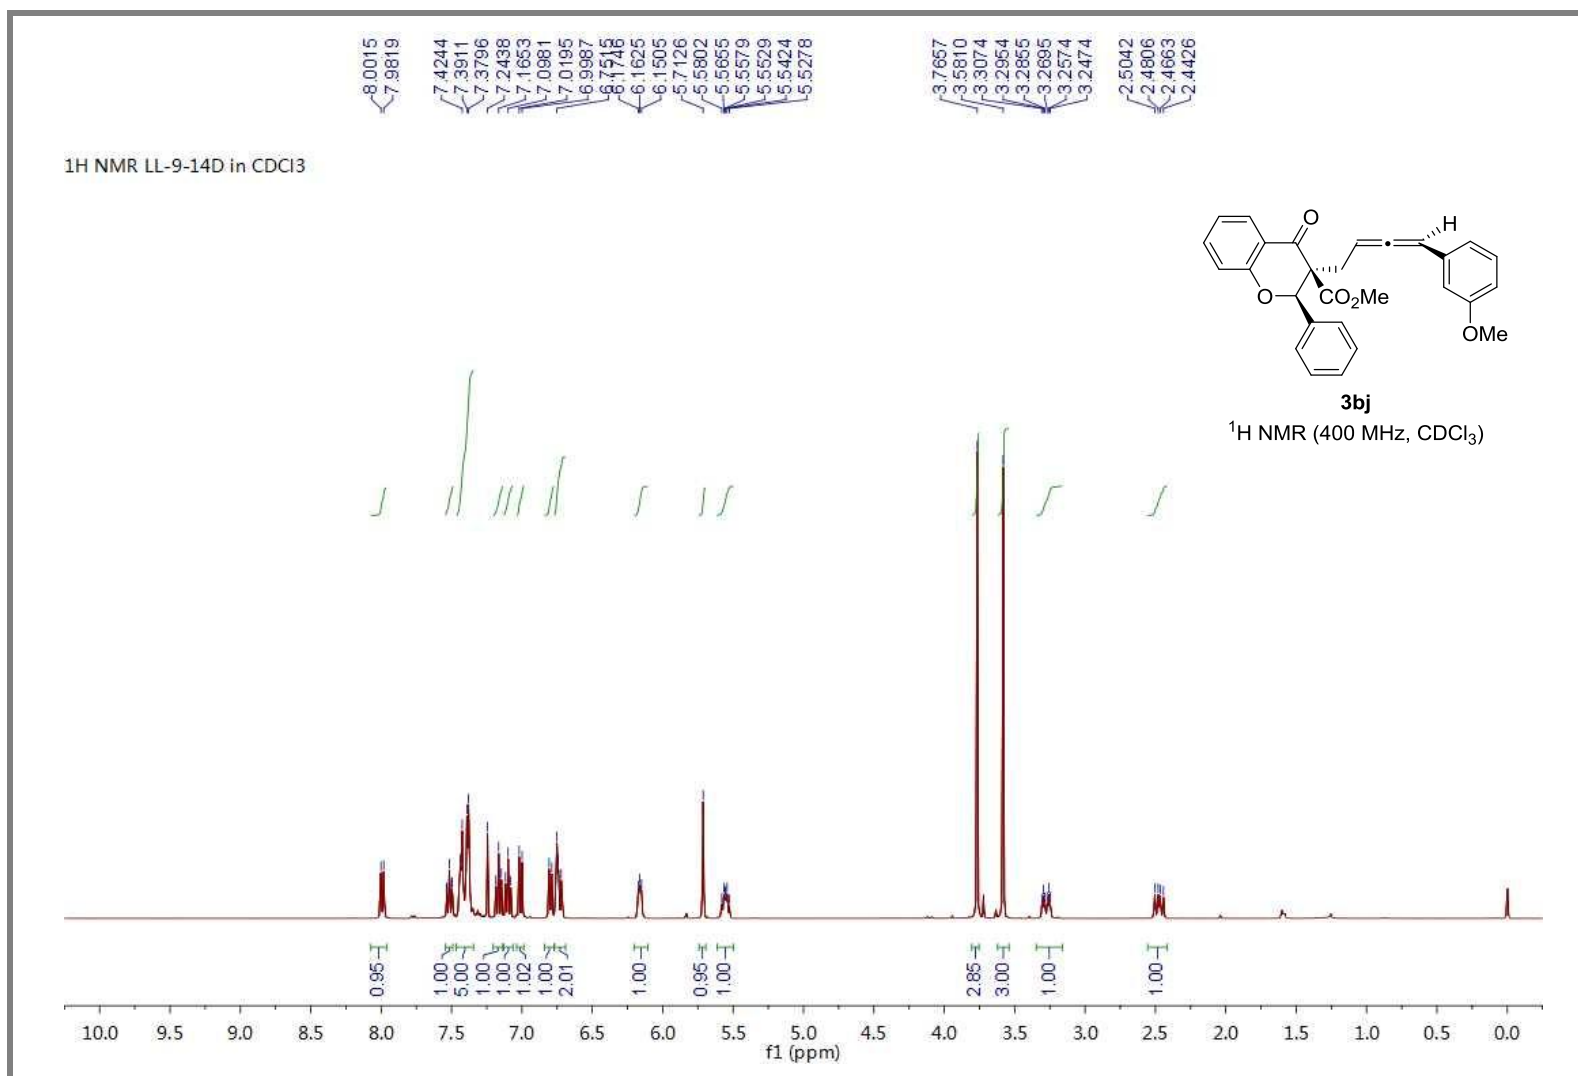

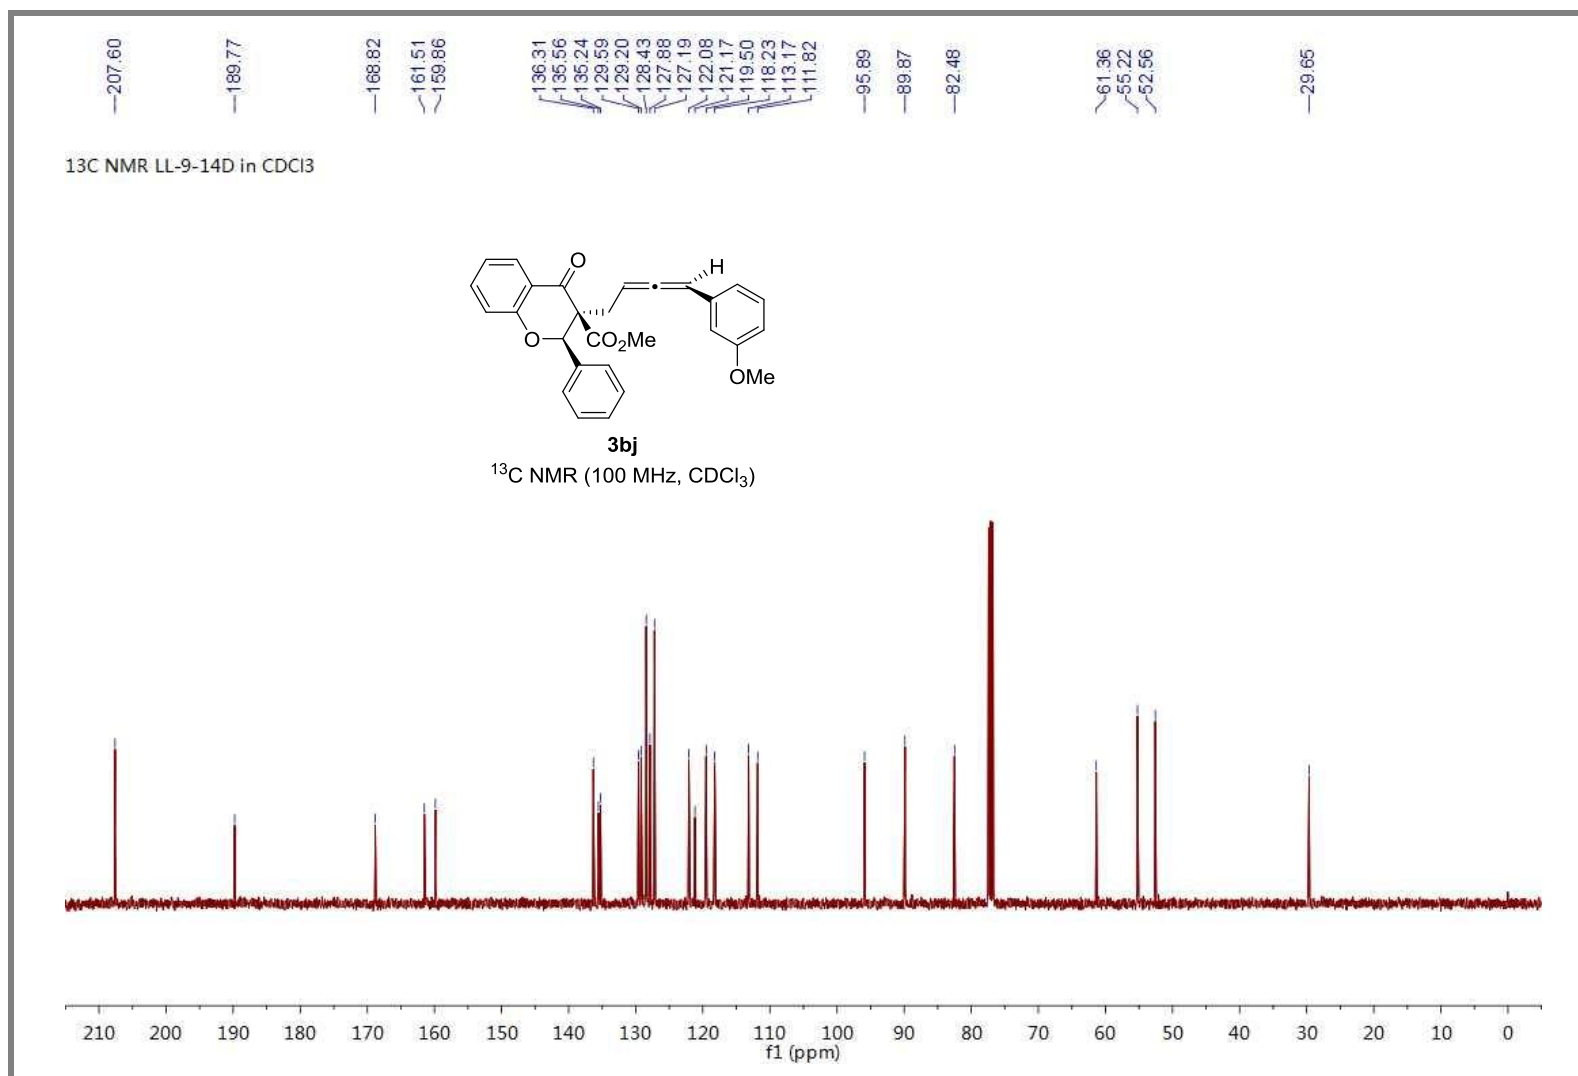

Data File C:\CHEM32\1\DATA\ZHOU-22\YZN020717.D  
 Sample Name: LL-9-14D +/-

=====  
 Acq. Operator :  
 Acq. Instrument : Instrument 1 Location : -  
 Injection Date : 3/9/2022 10:04:02 PM  
 Acq. Method : C:\CHEM32\1\METHODS\DEF\_LC.M  
 Last changed : 3/9/2022 9:26:59 PM  
 (modified after loading)  
 Analysis Method : C:\CHEM32\1\METHODS\DEF\_LC.M  
 Last changed : 3/9/2022 11:07:55 PM  
 (modified after loading)  
 Sample Info : IC, Hexane/i-PrOH = 90/10, 1.0 mL/min, 30 oC, 254 nm

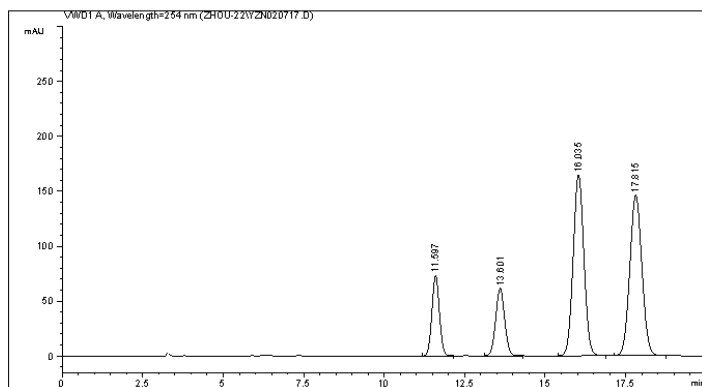

=====  
 Area Percent Report  
 =====

Sorted By : Signal  
 Multiplier: : 1.0000  
 Dilution: : 1.0000  
 Use Multiplier & Dilution Factor with ISTDs

Signal 1: WVD1 A, Wavelength=254 nm

| Peak # | RetTime [min] | Type | Width [min] | Area [mAU*s] | Height [mAU] | Area %  |
|--------|---------------|------|-------------|--------------|--------------|---------|
| 1      | 11.597        | BB   | 0.2538      | 1187.90027   | 73.03640     | 11.8266 |
| 2      | 13.601        | BB   | 0.3030      | 1194.94287   | 61.33486     | 11.8967 |
| 3      | 16.035        | BB   | 0.3623      | 3821.21606   | 164.78664    | 38.0436 |
| 4      | 17.815        | BB   | 0.4085      | 3840.24072   | 146.11418    | 38.2330 |

Totals : 1.00443e4 445.27208

=====  
 \*\*\* End of Report \*\*\*

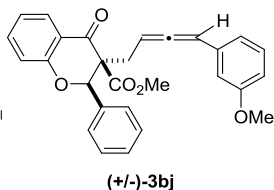

Data File C:\CHEM32\1\DATA\ZHOU-22\YZN020719.D  
 Sample Name: LL-9-14D

=====  
 Acq. Operator :  
 Acq. Instrument : Instrument 1 Location : -  
 Injection Date : 3/9/2022 10:48:21 PM  
 Acq. Method : C:\CHEM32\1\METHODS\DEF\_LC.M  
 Last changed : 3/9/2022 10:47:15 PM  
 (modified after loading)  
 Analysis Method : C:\CHEM32\1\METHODS\DEF\_LC.M  
 Last changed : 6/15/2022 7:42:54 AM  
 (modified after loading)  
 Sample Info : IC, Hexane/i-PrOH = 90/10, 1.0 mL/min, 30 oC, 254 nm

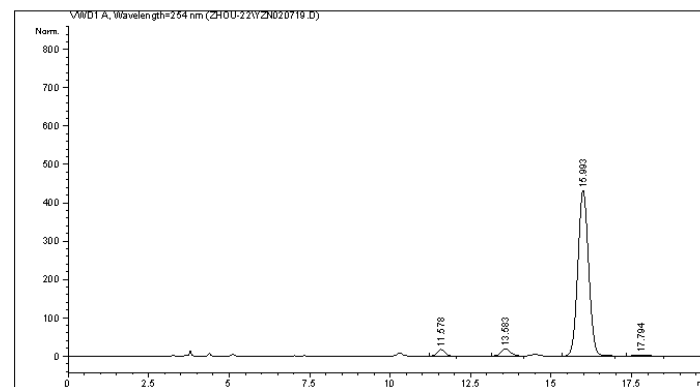

=====  
 Area Percent Report  
 =====

Sorted By : Signal  
 Multiplier: : 1.0000  
 Dilution: : 1.0000  
 Use Multiplier & Dilution Factor with ISTDs

Signal 1: WVD1 A, Wavelength=254 nm

| Peak # | RetTime [min] | Type | Width [min] | Area [mAU*s] | Height [mAU] | Area %  |
|--------|---------------|------|-------------|--------------|--------------|---------|
| 1      | 11.578        | BB   | 0.2544      | 278.29999    | 17.05905     | 2.6014  |
| 2      | 13.583        | BB   | 0.3163      | 378.79193    | 18.59351     | 3.5407  |
| 3      | 15.993        | BB   | 0.3601      | 9988.02344   | 431.86627    | 93.3622 |
| 4      | 17.794        | BB   | 0.4003      | 53.03202     | 2.06328      | 0.4957  |

Totals : 1.06981e4 469.58212

=====  
 \*\*\* End of Report \*\*\*

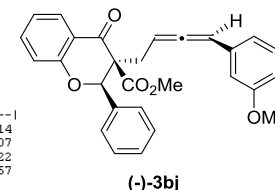

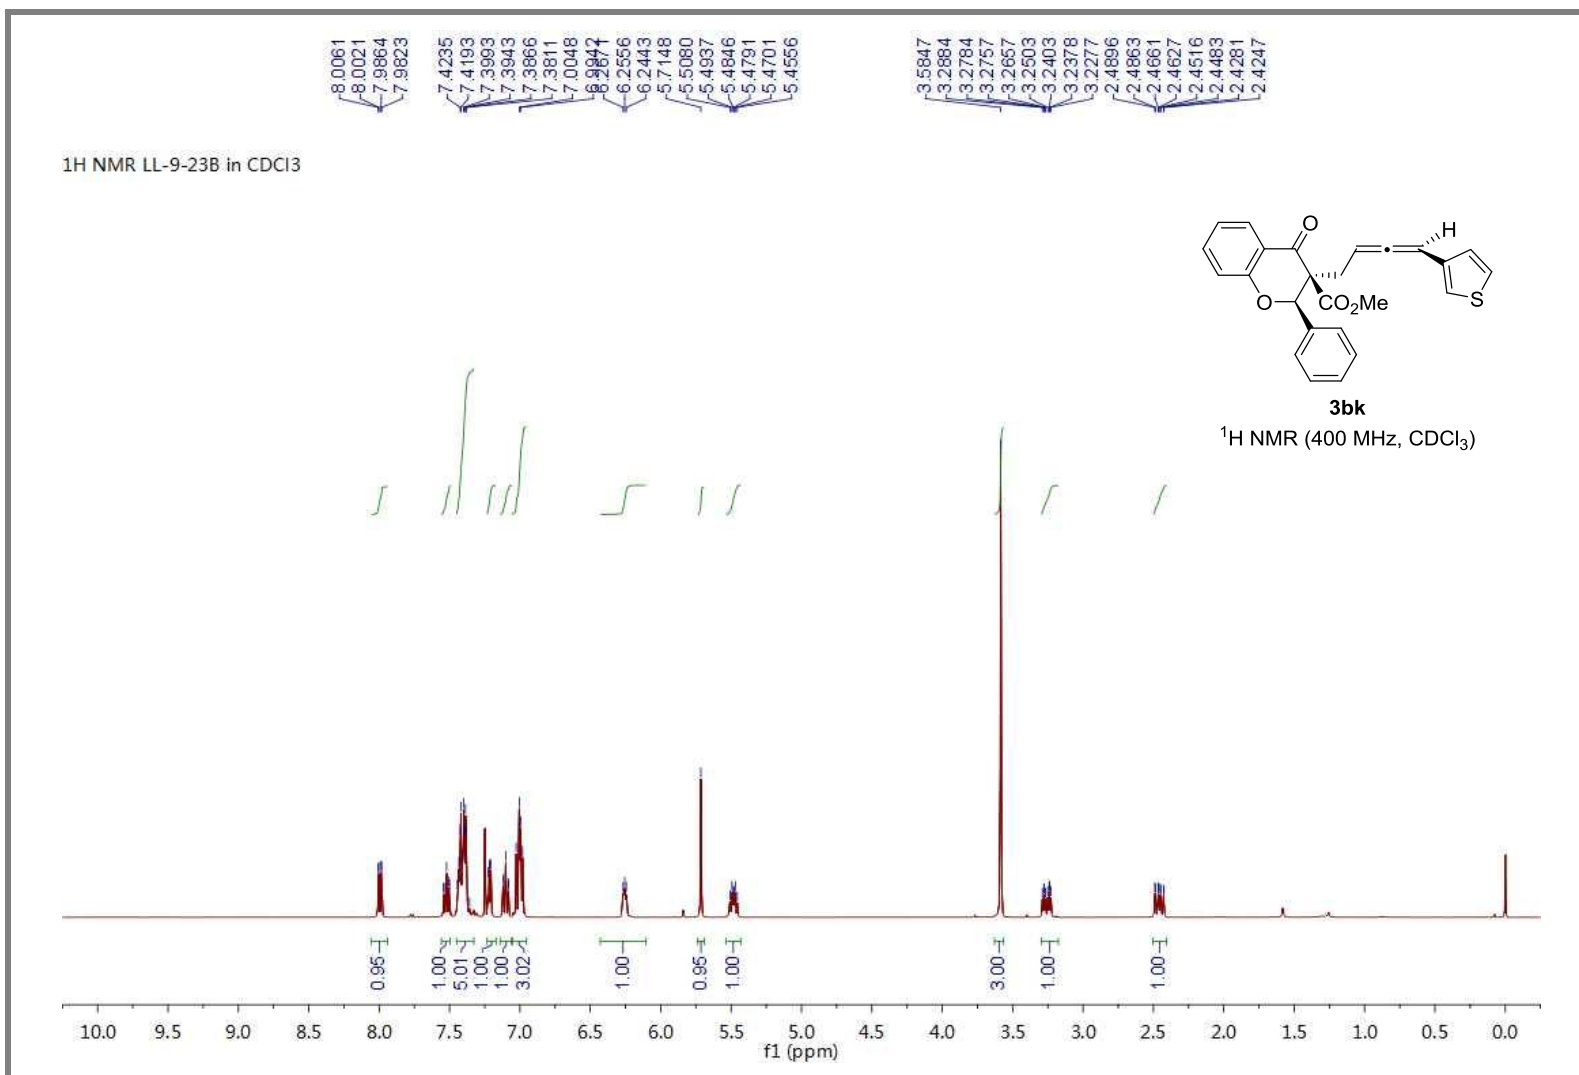

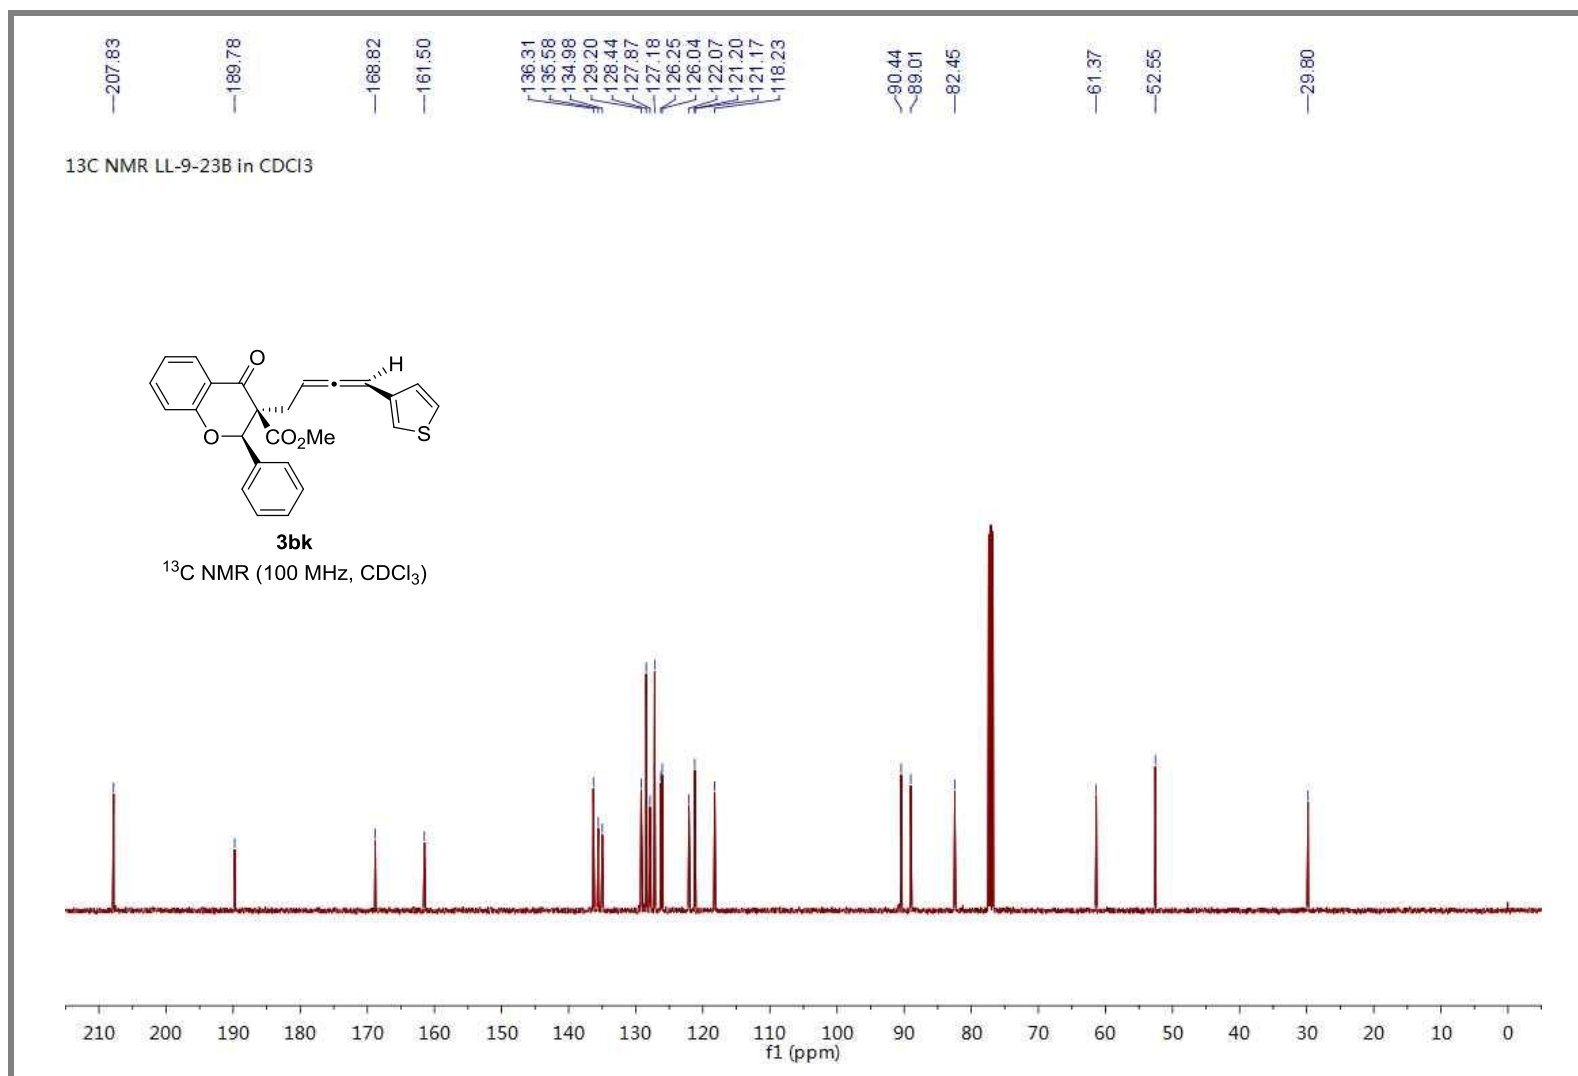

Data File C:\CHEM32\1\DATA\ZHOU-22\YZN020778.D  
 Sample Name: LL-9-23B +/-

=====  
 Acq. Operator :  
 Acq. Instrument : Instrument 1 Location : -  
 Injection Date : 3/17/2022 9:14:09 AM  
 Acq. Method : C:\CHEM32\1\METHODS\DEF\_LC.M  
 Last changed : 3/17/2022 9:06:21 AM  
 (modified after loading)  
 Analysis Method : C:\CHEM32\1\METHODS\DEF\_LC.M  
 Last changed : 3/17/2022 9:46:38 AM  
 (modified after loading)  
 Sample Info : AD-3, Hexane/i-PrOH = 94/6, 0.7 mL/min, 30 oC, 254 nm

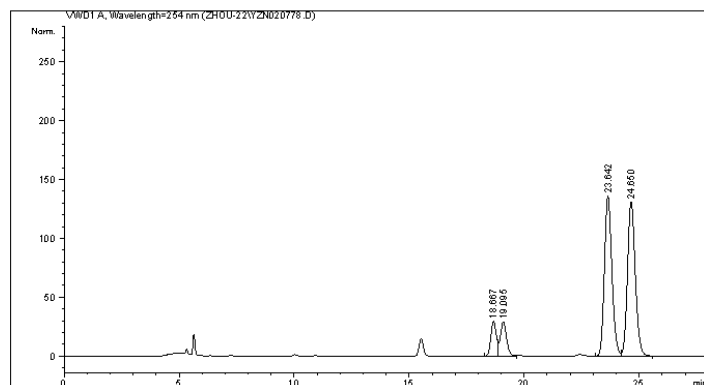

=====  
 Area Percent Report  
 =====

Sorted By : Signal  
 Multiplier: : 1.0000  
 Dilution: : 1.0000  
 Use Multiplier & Dilution Factor with ISTDs

Signal 1: VWD1 A, Wavelength=254 nm

| Peak # | RetTime [min] | Type | Width [min] | Area [mAU] | Height [mAU] | Area %  |
|--------|---------------|------|-------------|------------|--------------|---------|
| 1      | 18.667        | BV   | 0.2585      | 494.46790  | 29.45338     | 6.8550  |
| 2      | 19.095        | VB   | 0.2783      | 533.12946  | 29.03381     | 7.3909  |
| 3      | 23.642        | BV   | 0.3487      | 3085.68091 | 136.25540    | 42.7777 |
| 4      | 24.650        | VB   | 0.3648      | 3100.00732 | 131.04520    | 42.9764 |

Totals : 7213.28558 325.78779

=====  
 \*\*\* End of Report \*\*\*

Instrument 1 3/17/2022 9:46:47 AM

Page 1 of 1

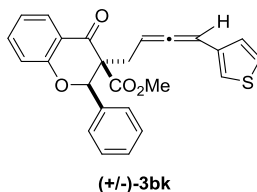

Data File C:\CHEM32\1\DATA\ZHOU-22\YZN020779.D  
 Sample Name: LL-9-23B

=====  
 Acq. Operator :  
 Acq. Instrument : Instrument 1 Location : -  
 Injection Date : 3/17/2022 9:45:37 AM  
 Acq. Method : C:\CHEM32\1\METHODS\DEF\_LC.M  
 Last changed : 3/17/2022 9:42:44 AM  
 (modified after loading)  
 Analysis Method : C:\CHEM32\1\METHODS\DEF\_LC.M  
 Last changed : 6/15/2022 4:53:16 AM  
 (modified after loading)  
 Sample Info : AD-3, Hexane/i-PrOH = 94/6, 0.7 mL/min, 30 oC, 254 nm

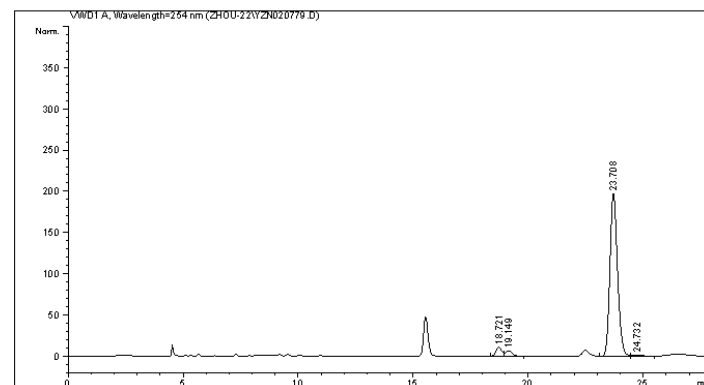

=====  
 Area Percent Report  
 =====

Sorted By : Signal  
 Multiplier: : 1.0000  
 Dilution: : 1.0000  
 Use Multiplier & Dilution Factor with ISTDs

Signal 1: VWD1 A, Wavelength=254 nm

| Peak # | RetTime [min] | Type | Width [min] | Area [mAU] | Height [mAU] | Area %  |
|--------|---------------|------|-------------|------------|--------------|---------|
| 1      | 18.721        | BV   | 0.2694      | 187.69525  | 10.81949     | 3.8552  |
| 2      | 19.149        | VB   | 0.2803      | 119.87869  | 6.46915      | 2.4623  |
| 3      | 23.708        | BV   | 0.3519      | 4523.33008 | 197.32307    | 92.9075 |
| 4      | 24.732        | VB   | 0.3947      | 37.73370   | 1.44586      | 0.7750  |

Totals : 4868.63772 216.05758

=====  
 \*\*\* End of Report \*\*\*

Instrument 1 6/15/2022 4:53:23 AM

Page 1 of 1

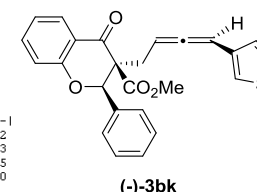



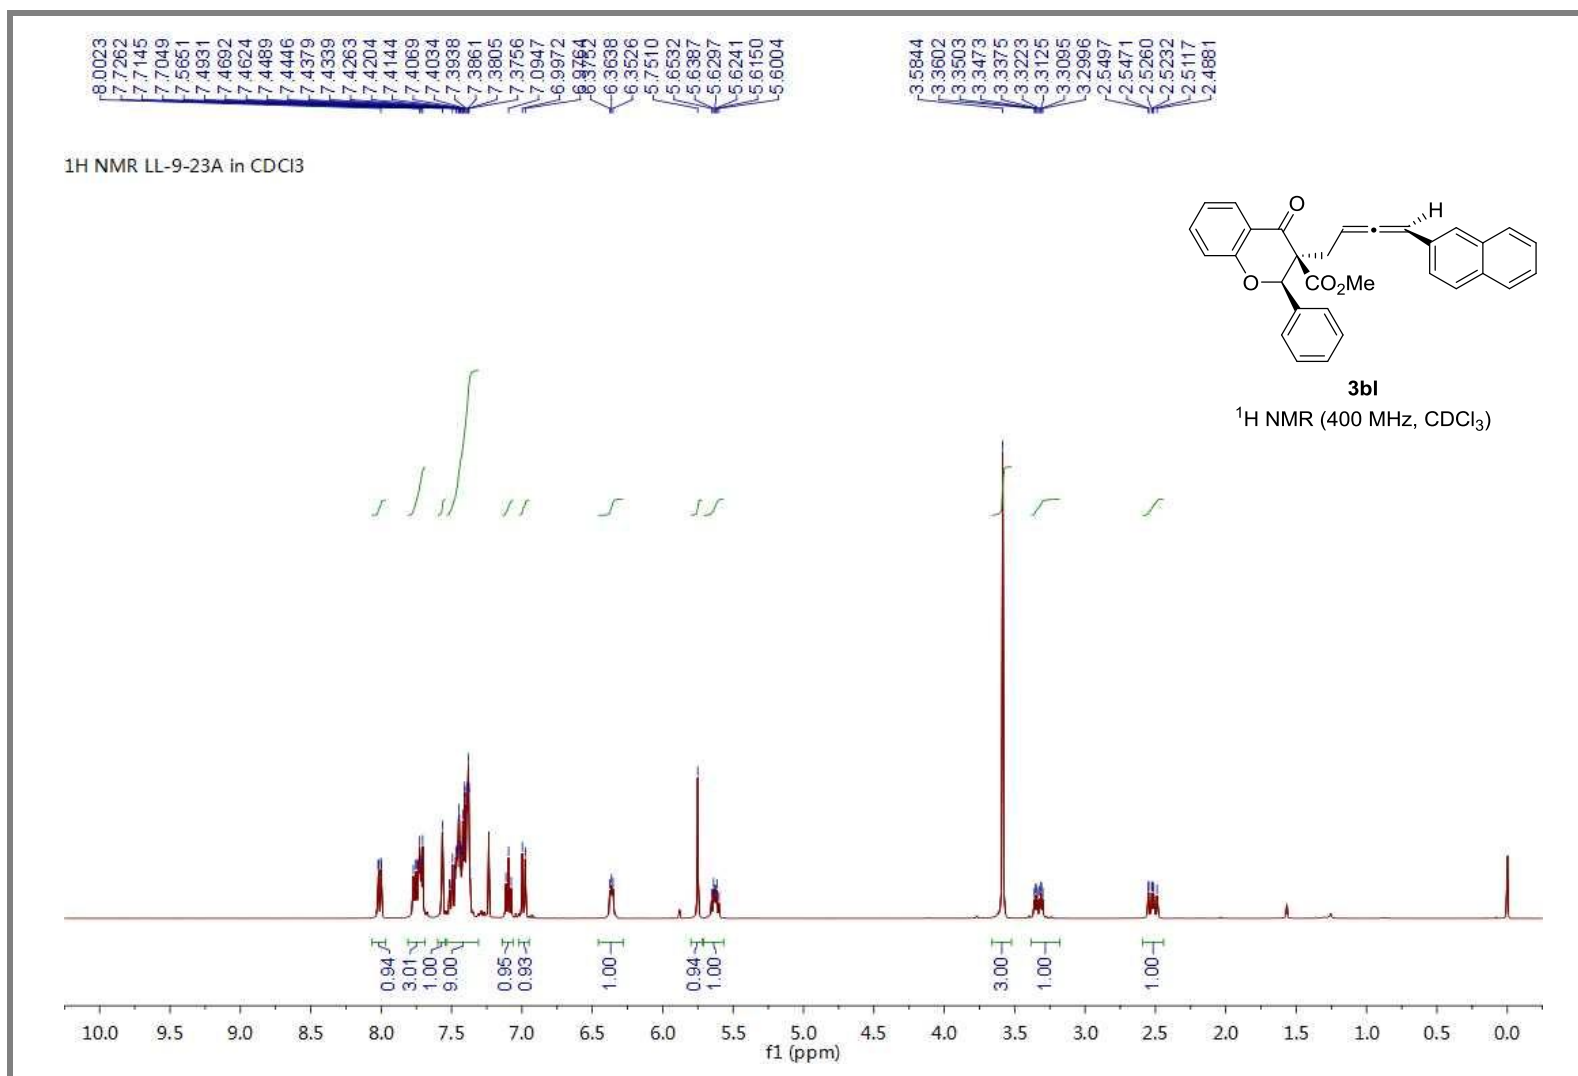

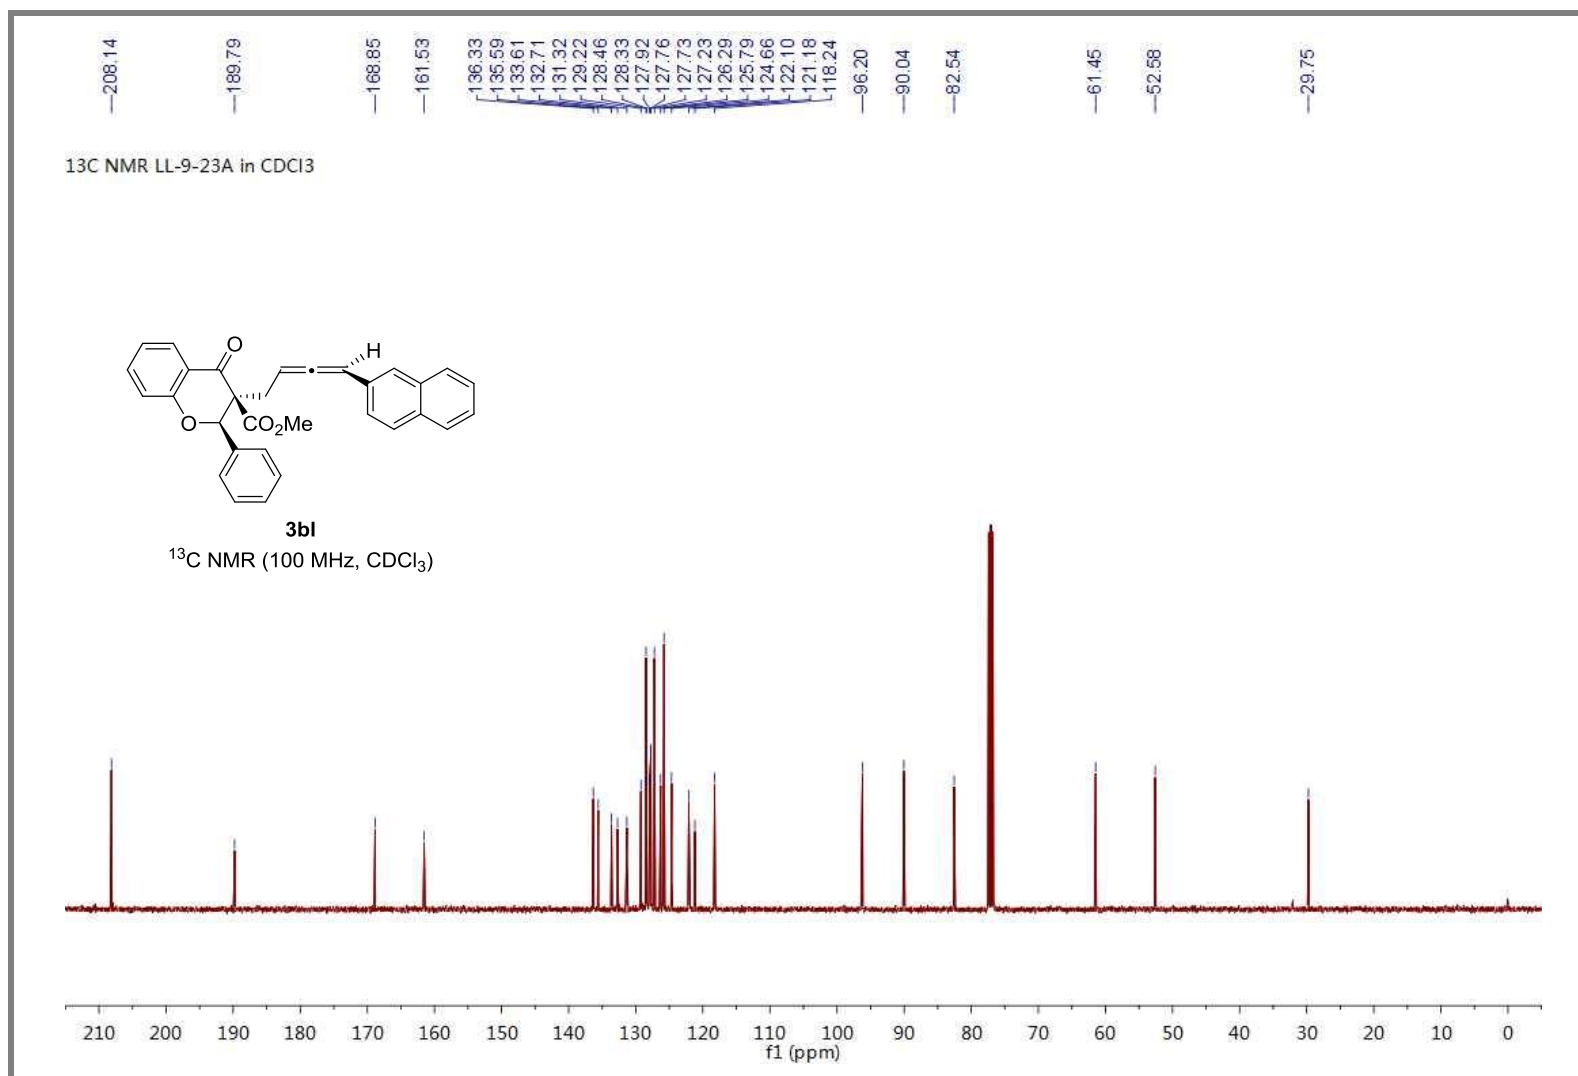

Data File C:\CHEM32\1\DATA\ZHOU-22\YZN020762.D  
 Sample Name: LL-9-23A +/-

=====  
 Acq. Operator :  
 Acq. Instrument : Instrument 1 Location : -  
 Injection Date : 3/16/2022 7:43:07 AM  
 Acq. Method : C:\CHEM32\1\METHODS\DEF\_LC.M  
 Last changed : 3/16/2022 7:41:24 AM  
 (modified after loading)  
 Analysis Method : C:\CHEM32\1\METHODS\DEF\_LC.M  
 Last changed : 6/15/2022 4:44:50 AM  
 (modified after loading)  
 Sample Info : IC, Hexane/i-PrOH = 90/10, 1.0 mL/min, 30 oC, 254 nm

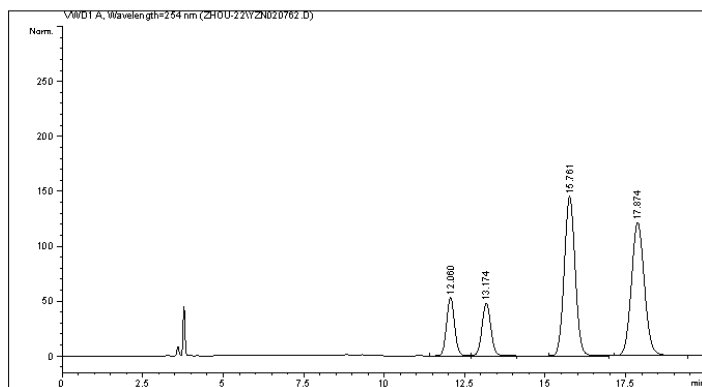

=====  
 Area Percent Report  
 =====

Sorted By : Signal  
 Multiplier: : 1.0000  
 Dilution: : 1.0000  
 Use Multiplier & Dilution Factor with ISTDs

Signal 1: WVD1 A, Wavelength=254 nm

| Peak # | RetTime [min] | Type | Width [min] | Area mAU   | Height %s | Area [mAU] | Area % |
|--------|---------------|------|-------------|------------|-----------|------------|--------|
| 1      | 12.060        | VV   | 0.2685      | 919.55884  | 53.22244  | 10.5993    |        |
| 2      | 13.174        | VB   | 0.3008      | 922.93939  | 47.83205  | 10.6382    |        |
| 3      | 15.761        | BB   | 0.3673      | 3409.43750 | 145.10915 | 39.2988    |        |
| 4      | 17.874        | BB   | 0.4372      | 3423.75244 | 121.25208 | 39.4638    |        |

Totals : 8675.68817 367.41571

=====  
 \*\*\* End of Report \*\*\*

Instrument 1 6/15/2022 4:44:53 AM

Page 1 of 1

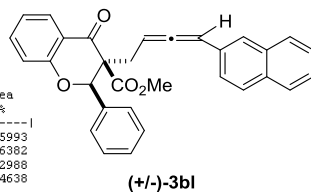

Data File C:\CHEM32\1\DATA\ZHOU-22\YZN020761.D  
 Sample Name: LL-9-23A

=====  
 Acq. Operator :  
 Acq. Instrument : Instrument 1 Location : -  
 Injection Date : 3/16/2022 7:21:04 AM  
 Acq. Method : C:\CHEM32\1\METHODS\DEF\_LC.M  
 Last changed : 3/16/2022 6:39:23 AM  
 (modified after loading)  
 Analysis Method : C:\CHEM32\1\METHODS\DEF\_LC.M  
 Last changed : 6/15/2022 4:43:35 AM  
 (modified after loading)  
 Sample Info : IC, Hexane/i-PrOH = 90/10, 1.0 mL/min, 30 oC, 254 nm

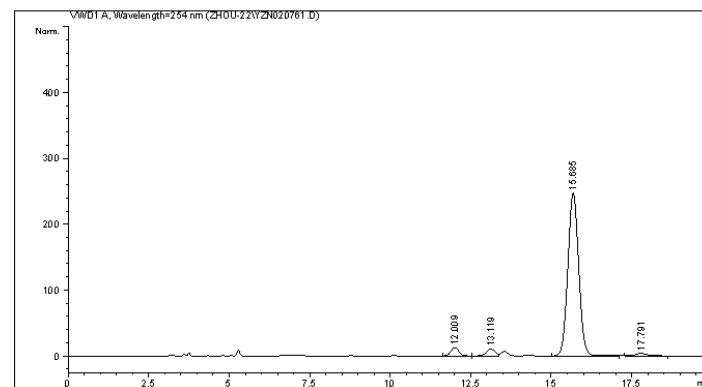

=====  
 Area Percent Report  
 =====

Sorted By : Signal  
 Multiplier: : 1.0000  
 Dilution: : 1.0000  
 Use Multiplier & Dilution Factor with ISTDs

Signal 1: WVD1 A, Wavelength=254 nm

| Peak # | RetTime [min] | Type | Width [min] | Area mAU   | Height %s | Area [mAU] | Area % |
|--------|---------------|------|-------------|------------|-----------|------------|--------|
| 1      | 12.009        | EV   | 0.2655      | 217.30882  | 12.70723  | 3.4578     |        |
| 2      | 13.119        | VV   | 0.2936      | 202.06879  | 10.67644  | 3.2153     |        |
| 3      | 15.685        | BB   | 0.3659      | 5772.92822 | 246.96793 | 91.8572    |        |
| 4      | 17.791        | BB   | 0.3742      | 92.37219   | 3.75670   | 1.4698     |        |

Totals : 6284.67802 274.10829

=====  
 \*\*\* End of Report \*\*\*

Instrument 1 6/15/2022 4:44:11 AM

Page 1 of 1

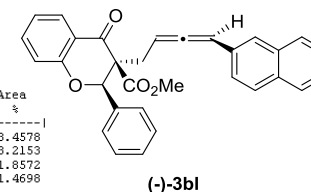

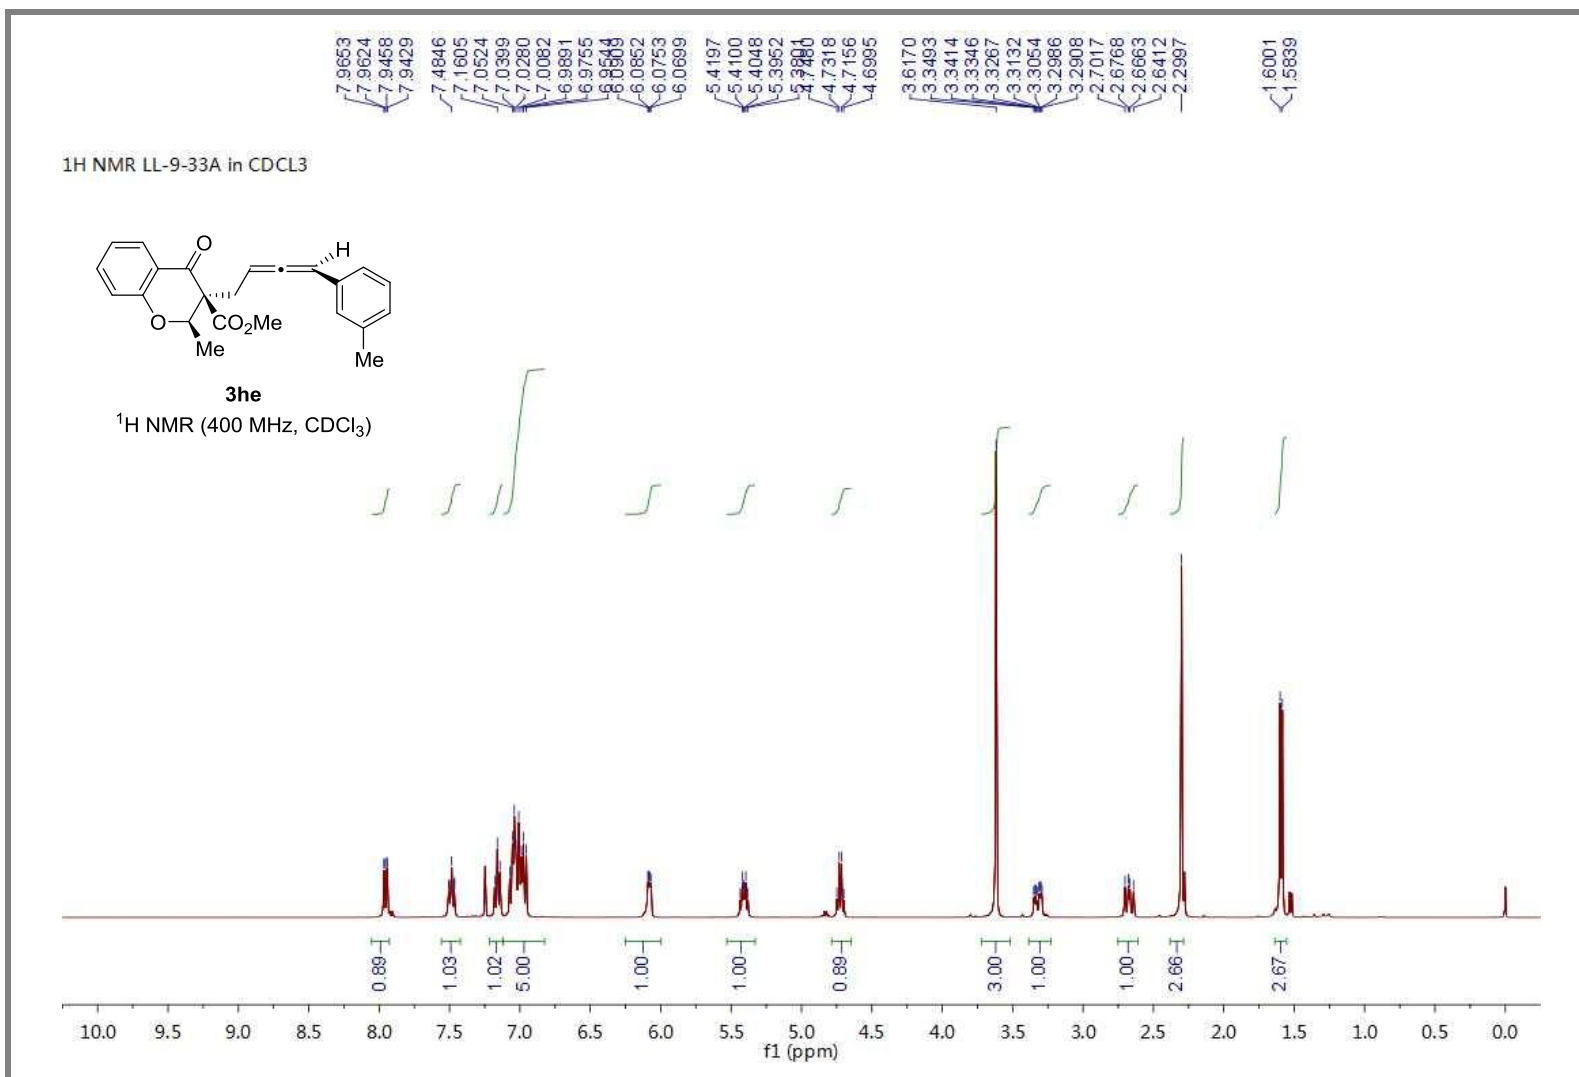

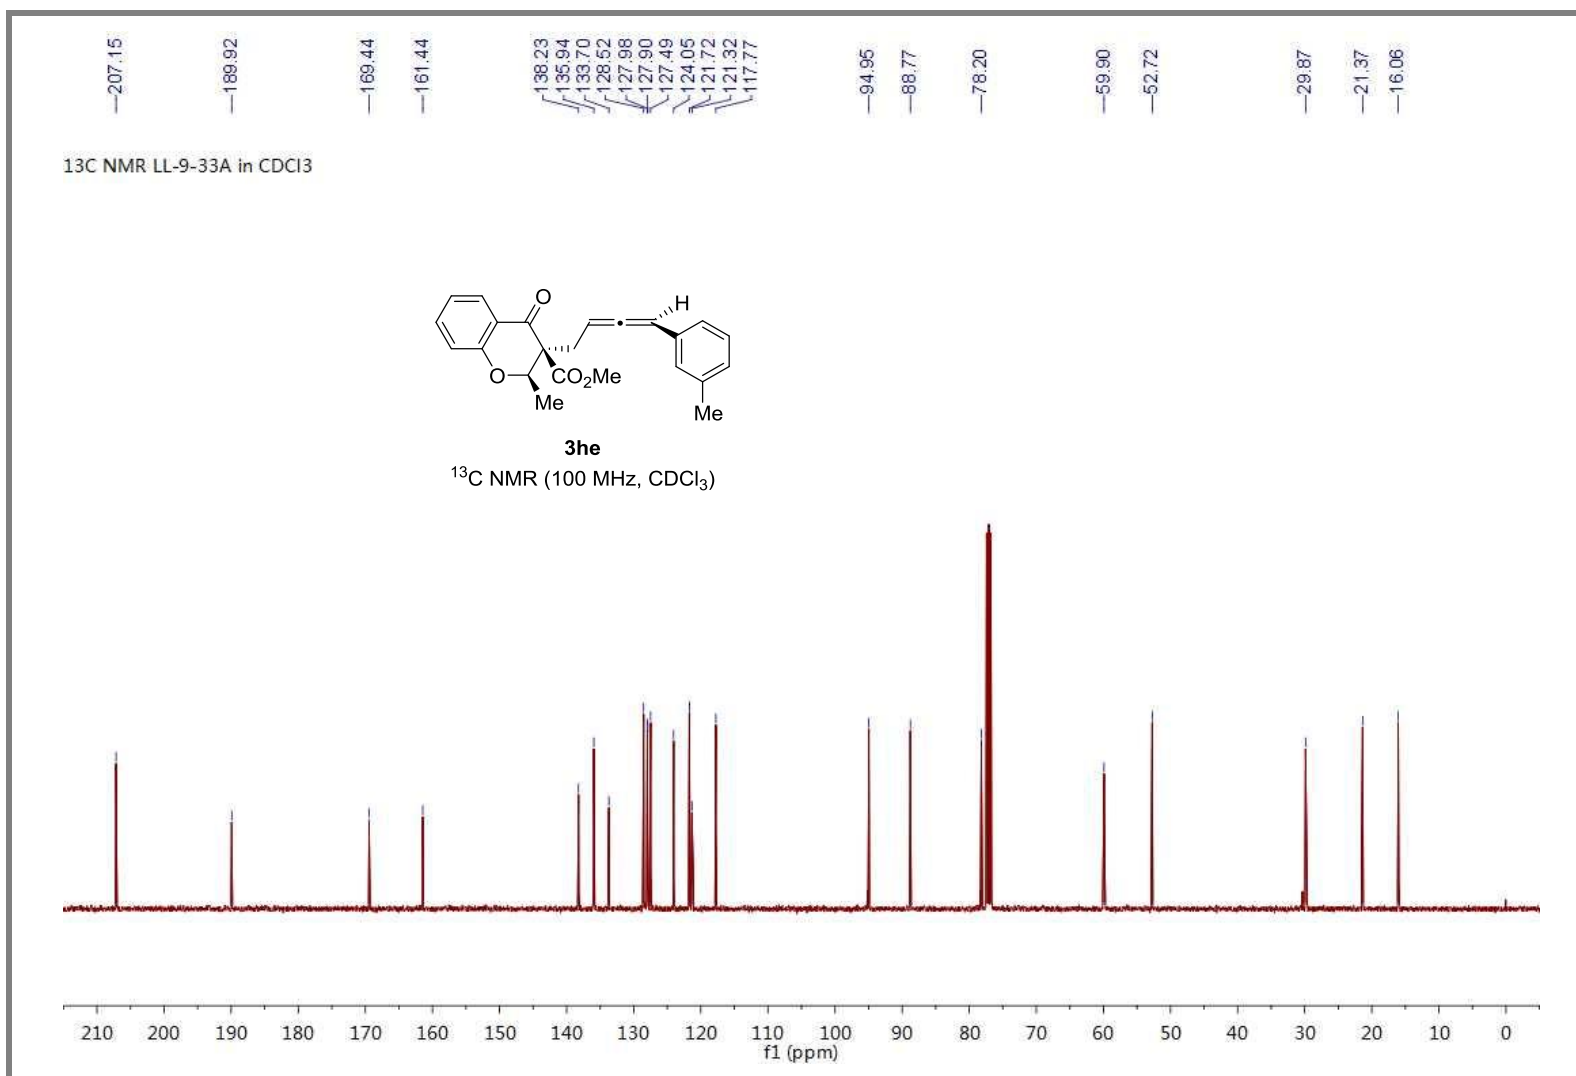

Data File C:\CHEM32\1\DATA\ZHOU-22\YZN020818.D  
 Sample Name: LL-9-33A +/-

=====  
 Acq. Operator :  
 Acq. Instrument : Instrument 1 Location : -  
 Injection Date : 3/23/2022 5:07:09 AM  
 Acq. Method : C:\CHEM32\1\METHODS\DEF\_LC.M  
 Last changed : 3/23/2022 5:05:33 AM  
 (modified after loading)  
 Analysis Method : C:\CHEM32\1\METHODS\DEF\_LC.M  
 Last changed : 3/23/2022 8:37:37 AM  
 (modified after loading)  
 Sample Info : ID, Hexane/i-PrOH = 99/1, 1.0 mL/min, 30 oC, 254 nm

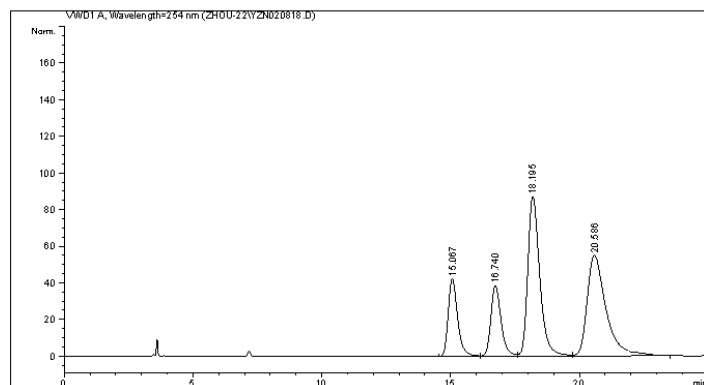

=====  
 Area Percent Report  
 =====

Sorted By : Signal  
 Multiplier: : 1.0000  
 Dilution: : 1.0000  
 Use Multiplier & Dilution Factor with ISTDs

Signal 1: VWD1 A, Wavelength=254 nm

| Peak # | RetTime [min] | Type | Width [min] | Area [mAU*s] | Height [mAU] | Area %  |
|--------|---------------|------|-------------|--------------|--------------|---------|
| 1      | 15.067        | BV   | 0.3869      | 1076.42566   | 42.34293     | 13.9090 |
| 2      | 16.740        | VV   | 0.4183      | 1056.60730   | 38.60597     | 13.6529 |
| 3      | 18.195        | VV   | 0.4912      | 2811.66382   | 87.19404     | 36.3309 |
| 4      | 20.586        | VB   | 0.7624      | 2794.34814   | 54.92817     | 36.1071 |

Totals : 7739.04492 223.07110

=====  
 \*\*\* End of Report \*\*\*

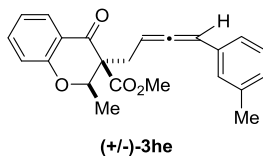

Data File C:\CHEM32\1\DATA\ZHOU-22\YZN020824.D  
 Sample Name: LL-9-33A

=====  
 Acq. Operator :  
 Acq. Instrument : Instrument 1 Location : -  
 Injection Date : 3/23/2022 8:26:43 AM  
 Acq. Method : C:\CHEM32\1\METHODS\DEF\_LC.M  
 Last changed : 3/23/2022 8:06:34 AM  
 (modified after loading)  
 Analysis Method : C:\CHEM32\1\METHODS\DEF\_LC.M  
 Last changed : 3/30/2022 3:07:38 AM  
 (modified after loading)  
 Sample Info : ID, Hexane/i-PrOH = 99/1, 1.0 mL/min, 30 oC, 254 nm

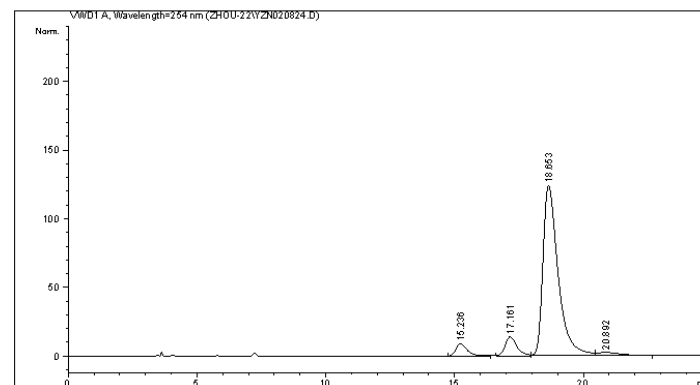

=====  
 Area Percent Report  
 =====

Sorted By : Signal  
 Multiplier: : 1.0000  
 Dilution: : 1.0000  
 Use Multiplier & Dilution Factor with ISTDs

Signal 1: VWD1 A, Wavelength=254 nm

| Peak # | RetTime [min] | Type | Width [min] | Area [mAU*s] | Height [mAU] | Area %  |
|--------|---------------|------|-------------|--------------|--------------|---------|
| 1      | 15.236        | BB   | 0.4487      | 266.65994    | 8.97192      | 4.4915  |
| 2      | 17.161        | BV   | 0.4802      | 437.92758    | 13.82677     | 7.3762  |
| 3      | 18.653        | VV   | 0.6141      | 5081.28662   | 124.22329    | 85.5865 |
| 4      | 20.892        | VB   | 0.9457      | 151.14662    | 2.34036      | 2.5458  |

Totals : 5937.02077 149.36235

=====  
 \*\*\* End of Report \*\*\*

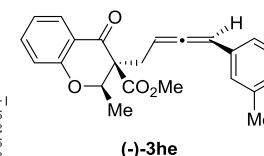

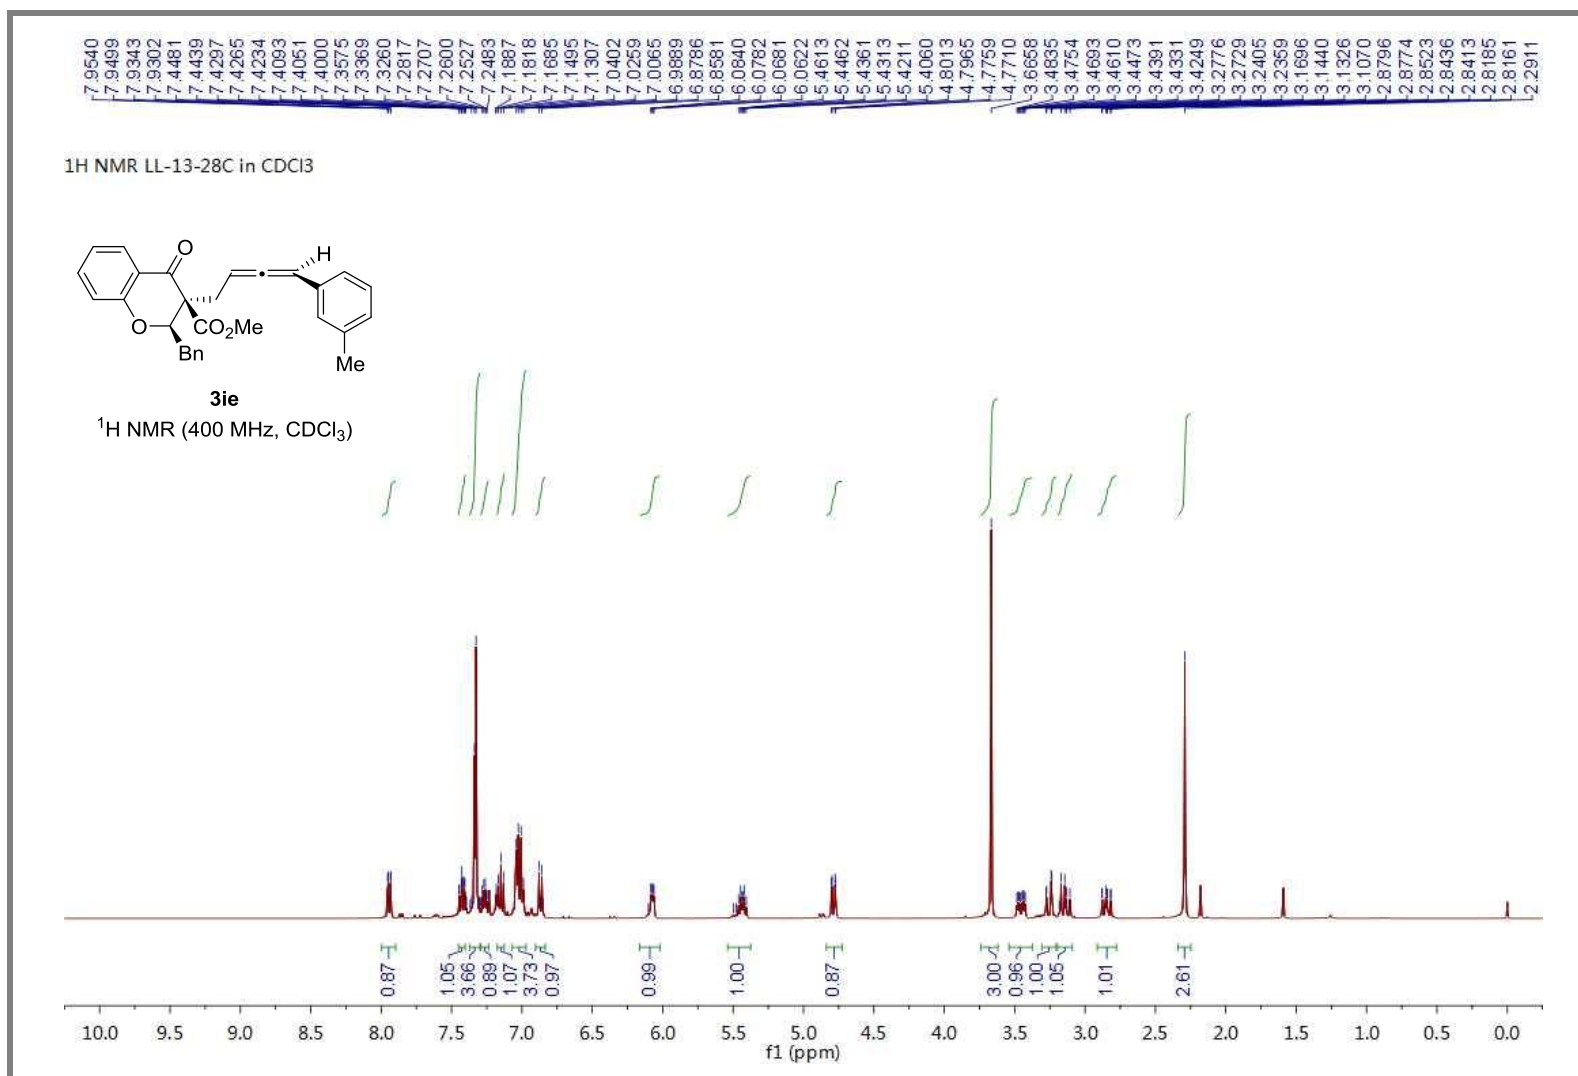

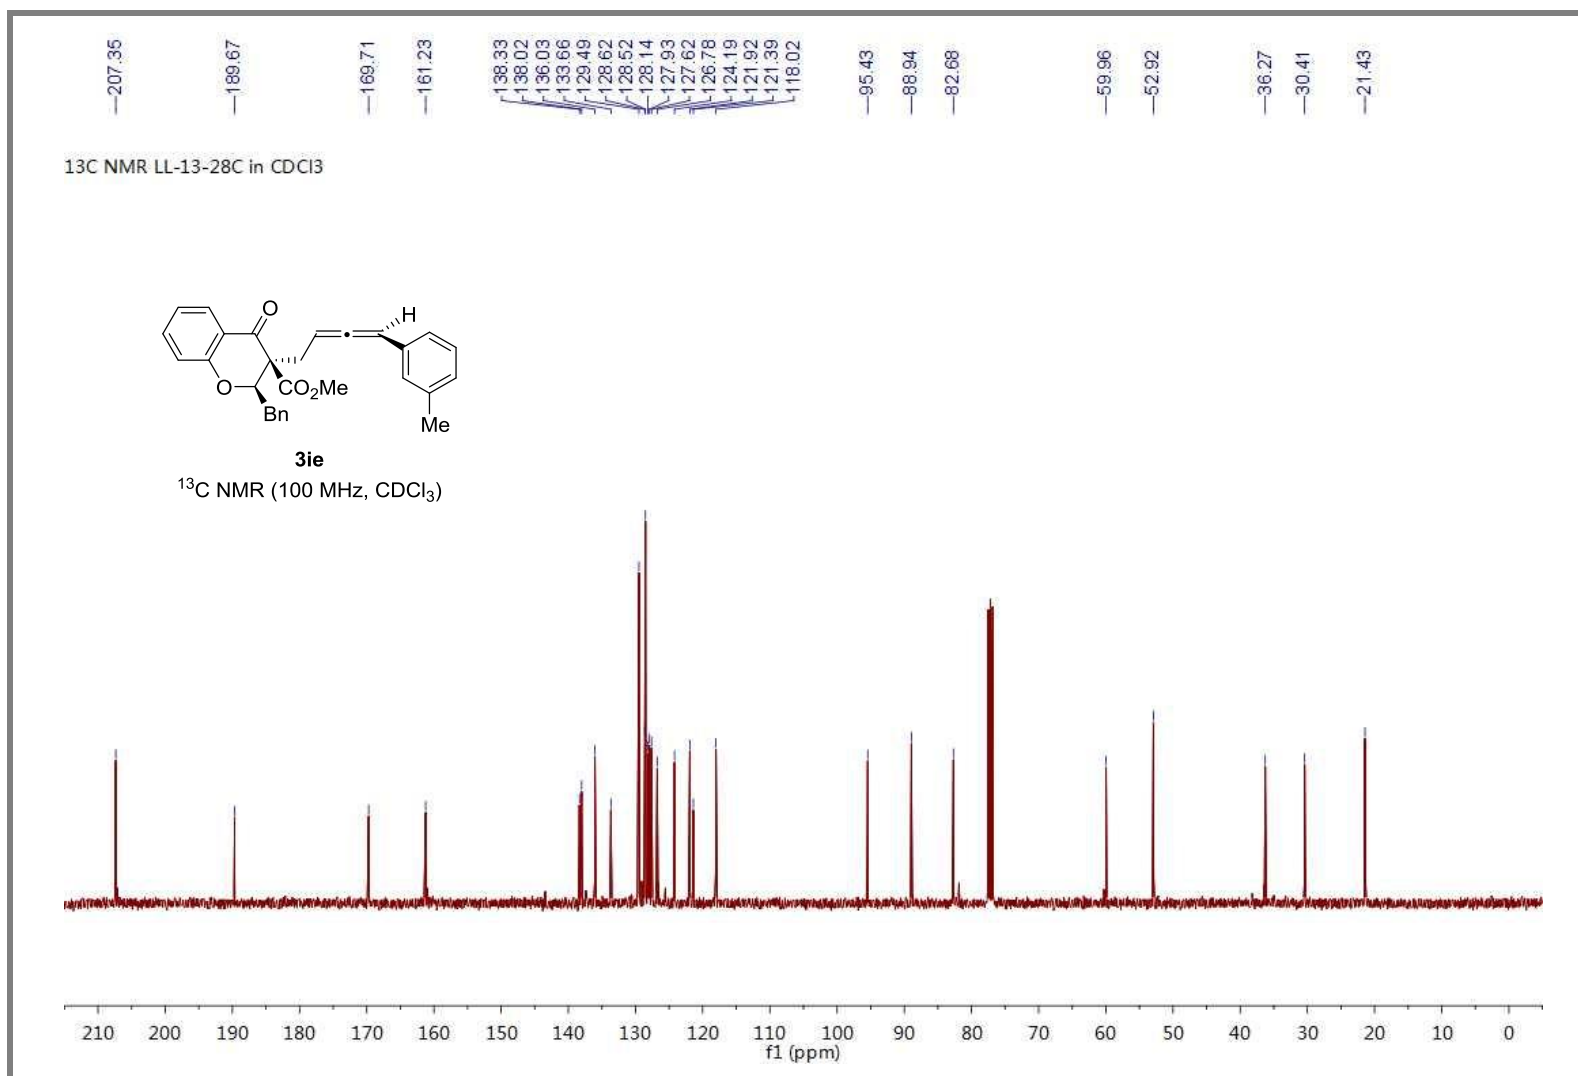



Data File C:\CHEM32\1\DATA\ZHOU-23\YZN024044.D  
 Sample Name: LL-13-28C +/-

=====  
 Acq. Operator :  
 Acq. Instrument : Instrument 1 Location : -  
 Injection Date : 9/19/2023 10:43:19 PM  
 Acq. Method : C:\CHEM32\1\METHODS\DEF\_LC.M  
 Last changed : 9/19/2023 10:38:08 PM  
 (modified after loading)  
 Analysis Method : C:\CHEM32\1\METHODS\DEF\_LC.M  
 Last changed : 9/21/2023 9:24:15 PM  
 (modified after loading)  
 Sample Info : AD-H+AD-H, Hexane/i-PrOH = 95/5, 0.9 mL/min, 30 oC, 254 nm

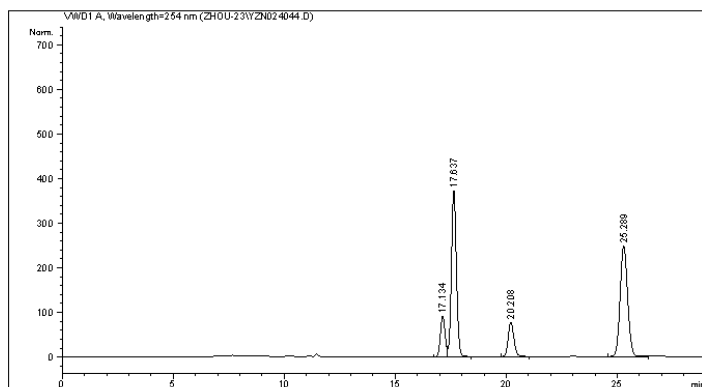

=====  
 Area Percent Report  
 =====

Sorted By : Signal  
 Multiplier: : 1.0000  
 Dilution: : 1.0000  
 Use Multiplier & Dilution Factor with ISTDs

Signal 1: VWD1 A, Wavelength=254 nm

| Peak #   | RetTime [min] | Type | Width [min] | Area [mAU] | %s        | Height [mAU] | Area % |
|----------|---------------|------|-------------|------------|-----------|--------------|--------|
| 1        | 17.134        | VV   | 0.2300      | 1342.38940 | 91.20565  | 9.3562       |        |
| 2        | 17.637        | VB   | 0.2410      | 5789.79736 | 372.53113 | 40.3537      |        |
| 3        | 20.208        | EB   | 0.2780      | 1394.49280 | 77.64726  | 9.7193       |        |
| 4        | 25.289        | VB   | 0.3624      | 5820.95996 | 248.25450 | 40.5709      |        |
| Totals : |               |      |             | 1.43476e4  | 789.63854 |              |        |

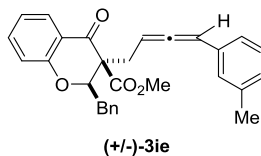

=====  
 \*\*\* End of Report \*\*\*

Instrument 1 9/21/2023 9:24:18 PM

Page 1 of 1

Data File C:\CHEM32\1\DATA\ZHOU-23\YZN024066.D  
 Sample Name: LL-13-28C

=====  
 Acq. Operator :  
 Acq. Instrument : Instrument 1 Location : -  
 Injection Date : 9/21/2023 6:43:02 AM  
 Acq. Method : C:\CHEM32\1\METHODS\DEF\_LC.M  
 Last changed : 9/21/2023 6:13:05 AM  
 (modified after loading)  
 Analysis Method : C:\CHEM32\1\METHODS\DEF\_LC.M  
 Last changed : 9/21/2023 9:23:50 PM  
 (modified after loading)  
 Sample Info : AD-H+AD-H, Hexane/i-PrOH = 95/5, 0.9 mL/min, 30 oC, 254 nm

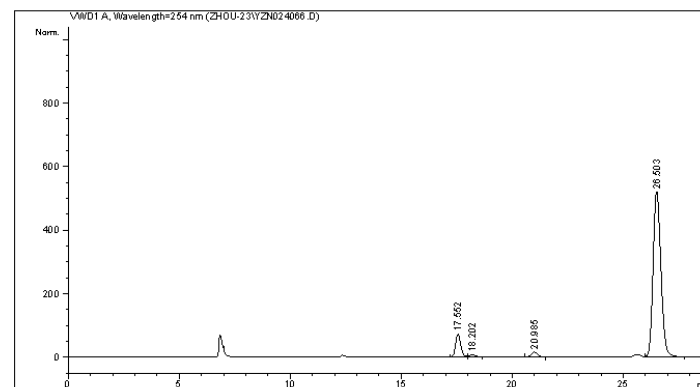

=====  
 Area Percent Report  
 =====

Sorted By : Signal  
 Multiplier: : 1.0000  
 Dilution: : 1.0000  
 Use Multiplier & Dilution Factor with ISTDs

Signal 1: VWD1 A, Wavelength=254 nm

| Peak #   | RetTime [min] | Type | Width [min] | Area [mAU] | %s        | Height [mAU] | Area % |
|----------|---------------|------|-------------|------------|-----------|--------------|--------|
| 1        | 17.552        | BV   | 0.2471      | 1139.35913 | 71.46947  | 7.9879       |        |
| 2        | 18.202        | VB   | 0.2570      | 115.74724  | 6.89500   | 0.8115       |        |
| 3        | 20.985        | EB   | 0.2890      | 289.00583  | 15.38932  | 2.0262       |        |
| 4        | 26.503        | VB   | 0.3780      | 1.27194e4  | 520.98602 | 89.1744      |        |
| Totals : |               |      |             | 1.42635e4  | 614.73982 |              |        |

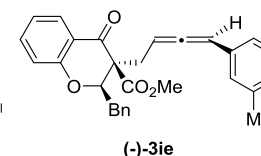

=====  
 \*\*\* End of Report \*\*\*

Instrument 1 9/21/2023 9:23:53 PM

Page 1 of 1

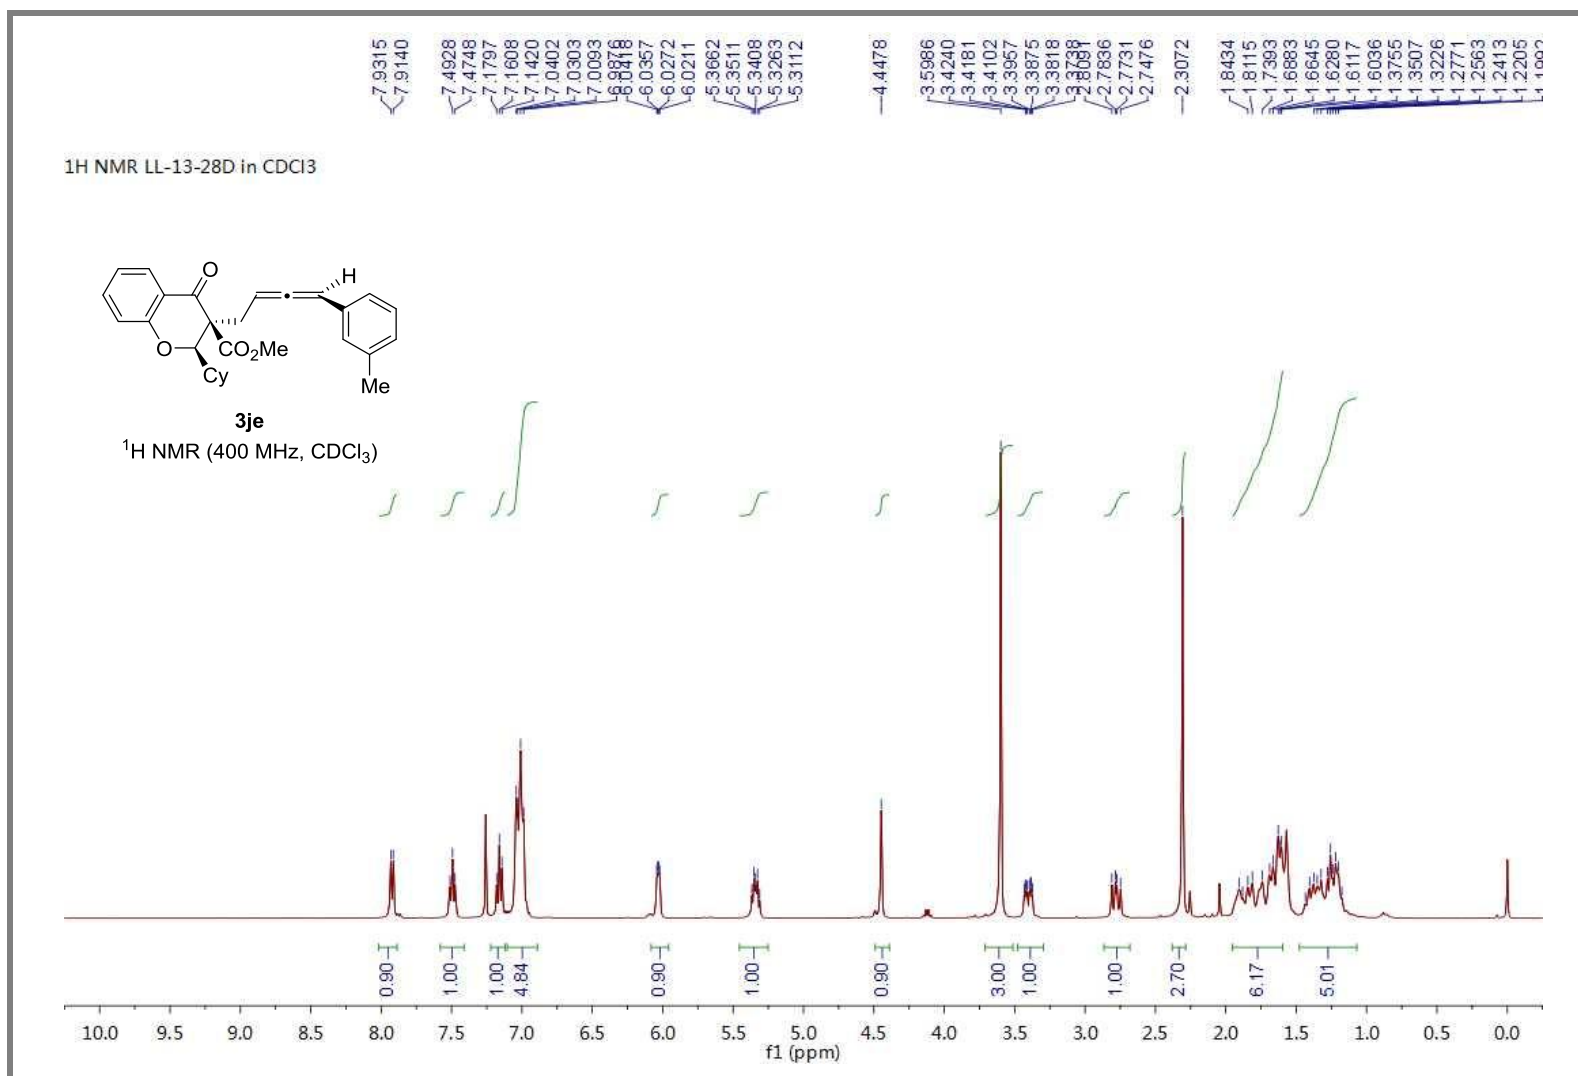

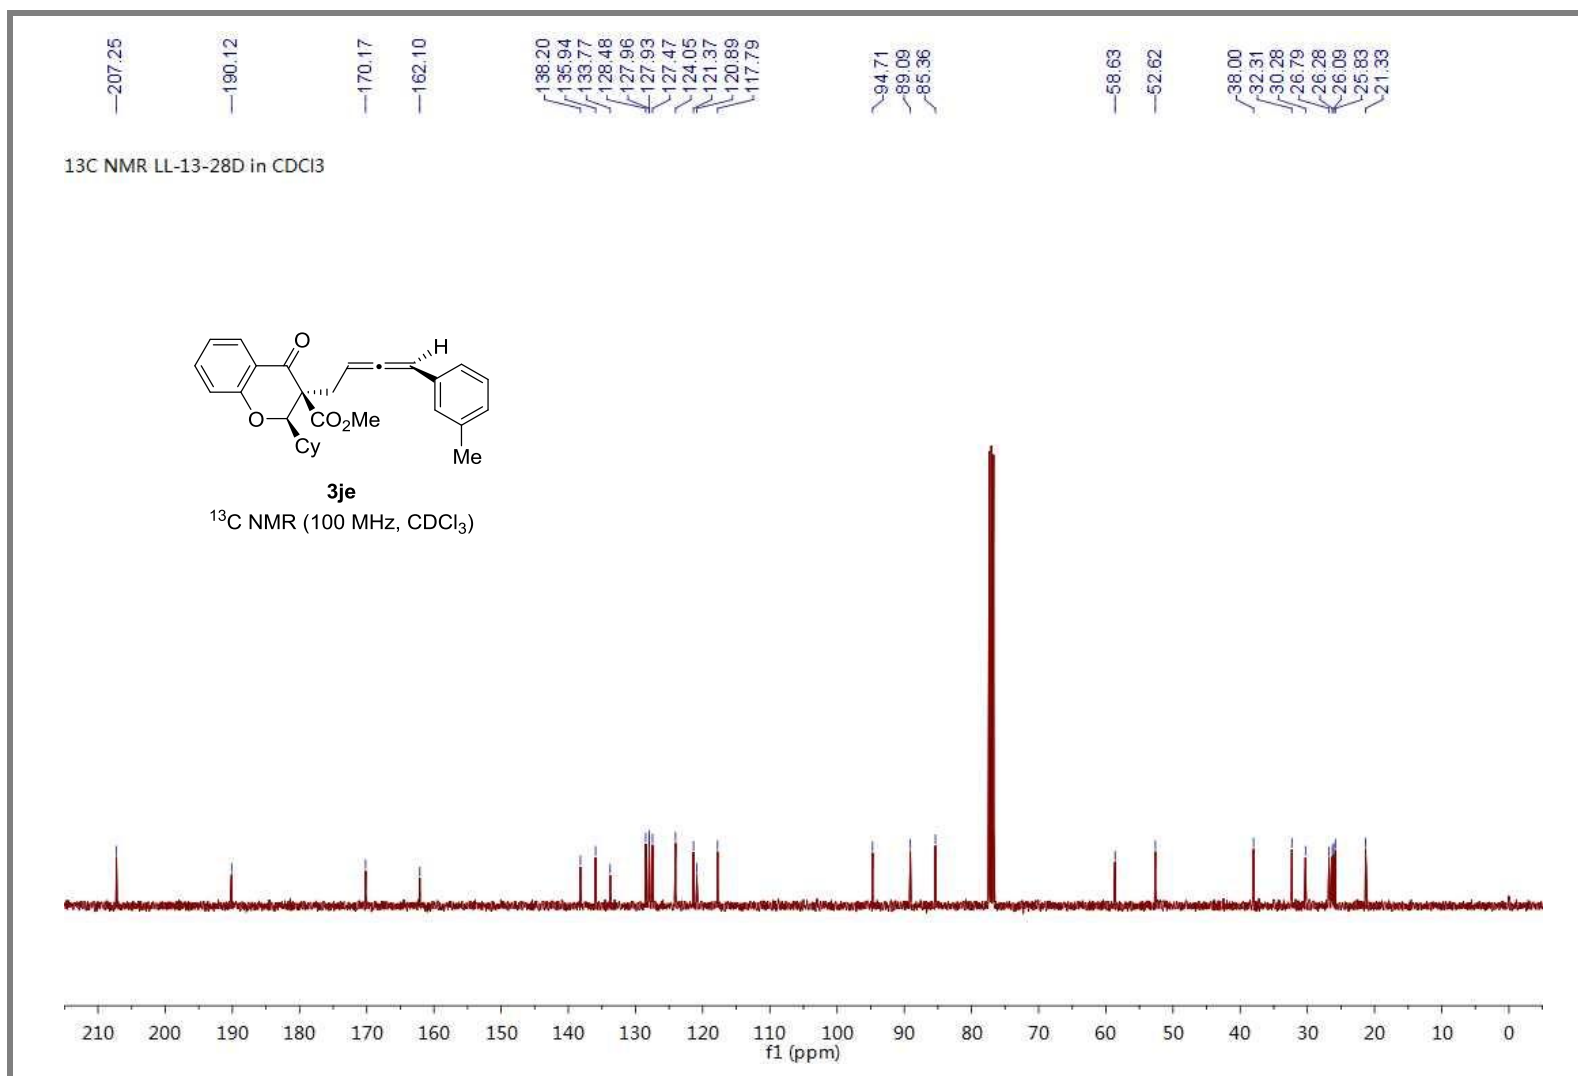

Data File C:\CHEM32\1\DATA\ZHOU-23\YZN024065.D  
 Sample Name: LL-13-28D +/-

=====  
 Acq. Operator :  
 Acq. Instrument : Instrument 1 Location : -  
 Injection Date : 9/21/2023 4:46:20 AM  
 Acq. Method : C:\CHEM32\1\METHODS\DEF\_LC.M  
 Last changed : 9/21/2023 4:44:14 AM  
 (modified after loading)  
 Analysis Method : C:\CHEM32\1\METHODS\DEF\_LC.M  
 Last changed : 9/21/2023 9:32:06 PM  
 (modified after loading)  
 Sample Info : OD-H+IC, Hexane/i-PrOH = 97/3, 0.8 mL/min, 30 oC, 254 n  
 m

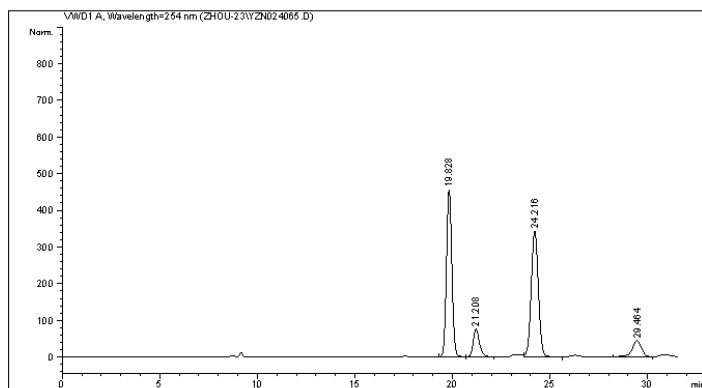

=====  
 Area Percent Report  
 =====

Sorted By : Signal  
 Multiplier: : 1.0000  
 Dilution: : 1.0000  
 Use Multiplier & Dilution Factor with ISTDs

Signal 1: VWD1 A, Wavelength=254 nm

| Peak # | RetTime [min] | Type | Width [min] | Area [mAU] | %s        | Height [mAU] | Area %  |
|--------|---------------|------|-------------|------------|-----------|--------------|---------|
| 1      | 19.828        | VV   | 0.2995      | 8726.39648 | 454.84616 | 42.2623      | 42.2623 |
| 2      | 21.208        | VV   | 0.3446      | 1705.59131 | 75.62910  | 8.2603       | 8.2603  |
| 3      | 24.216        | VB   | 0.3957      | 8728.98437 | 343.23184 | 42.2749      | 42.2749 |
| 4      | 29.464        | VV   | 0.5188      | 1487.19116 | 43.76091  | 7.2025       | 7.2025  |

Totals : 2.06482e4 917.46801

=====  
 \*\*\* End of Report \*\*\*

Instrument 1 9/21/2023 9:32:12 PM

Page 1 of 1

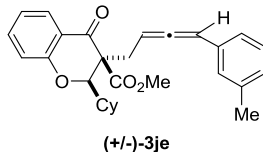

Data File C:\CHEM32\1\DATA\ZHOU-23\YZN024064.D  
 Sample Name: LL-13-28D

=====  
 Acq. Operator :  
 Acq. Instrument : Instrument 1 Location : -  
 Injection Date : 9/21/2023 4:03:42 AM  
 Acq. Method : C:\CHEM32\1\METHODS\DEF\_LC.M  
 Last changed : 9/21/2023 3:40:41 AM  
 (modified after loading)  
 Analysis Method : C:\CHEM32\1\METHODS\DEF\_LC.M  
 Last changed : 9/21/2023 9:29:16 PM  
 (modified after loading)  
 Sample Info : OD-H+IC, Hexane/i-PrOH = 97/3, 0.8 mL/min, 30 oC, 254 n  
 m

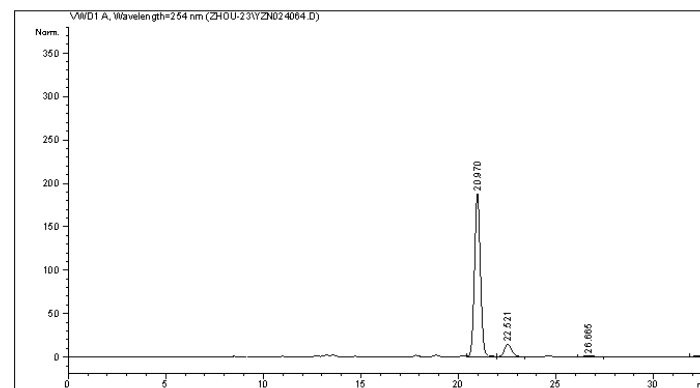

=====  
 Area Percent Report  
 =====

Sorted By : Signal  
 Multiplier: : 1.0000  
 Dilution: : 1.0000  
 Use Multiplier & Dilution Factor with ISTDs

Signal 1: VWD1 A, Wavelength=254 nm

| Peak # | RetTime [min] | Type | Width [min] | Area [mAU] | %s         | Height [mAU] | Area %  |
|--------|---------------|------|-------------|------------|------------|--------------|---------|
| 1      | 20.970        | VV   | 0.3273      | 3958.90942 | 187.91132  | 89.2798      | 89.2798 |
| 2      | 22.521        | VB   | 0.3844      | 371.30734  | 14.72752   | 8.3736       | 8.3736  |
| 3      | 26.665        | EB   | 0.4477      | 24.16426   | 8.29179e-1 | 0.5449       | 0.5449  |
| 4      | 32.605        | EV   | 0.5840      | 79.88892   | 2.07104    | 1.8016       | 1.8016  |

Totals : 4434.26995 205.53906

=====  
 \*\*\* End of Report \*\*\*

Instrument 1 9/21/2023 9:29:19 PM

Page 1 of 1

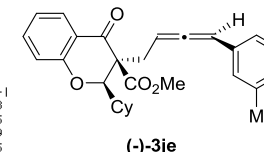

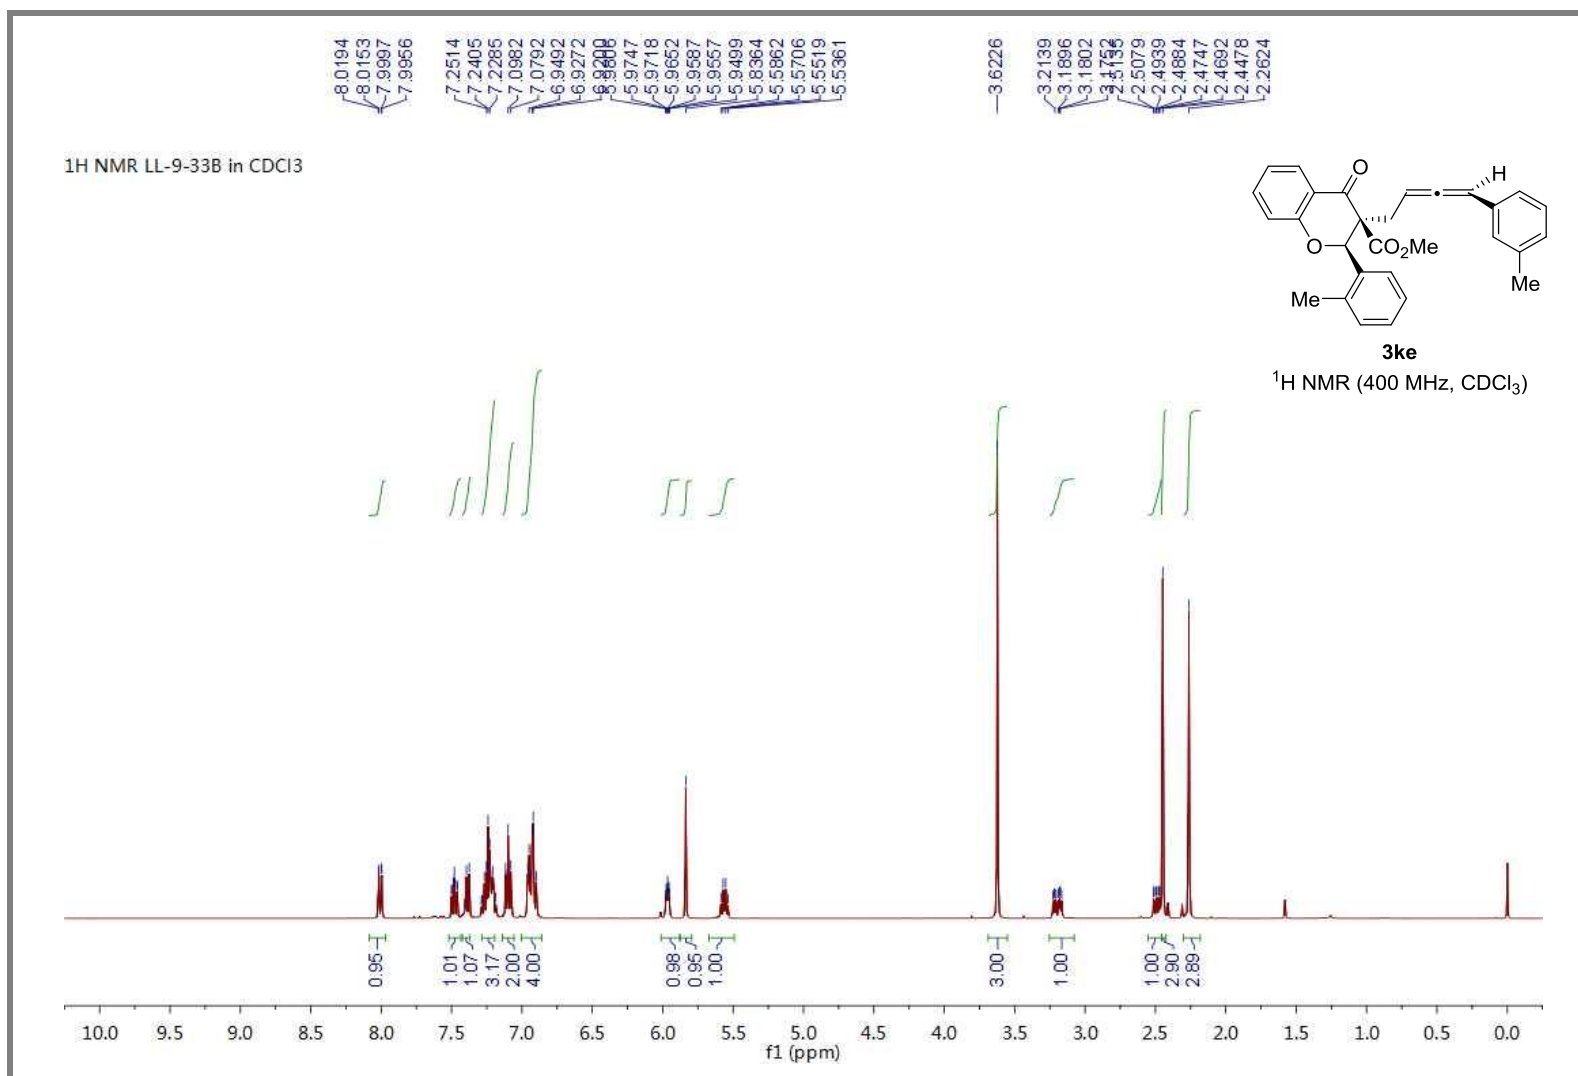

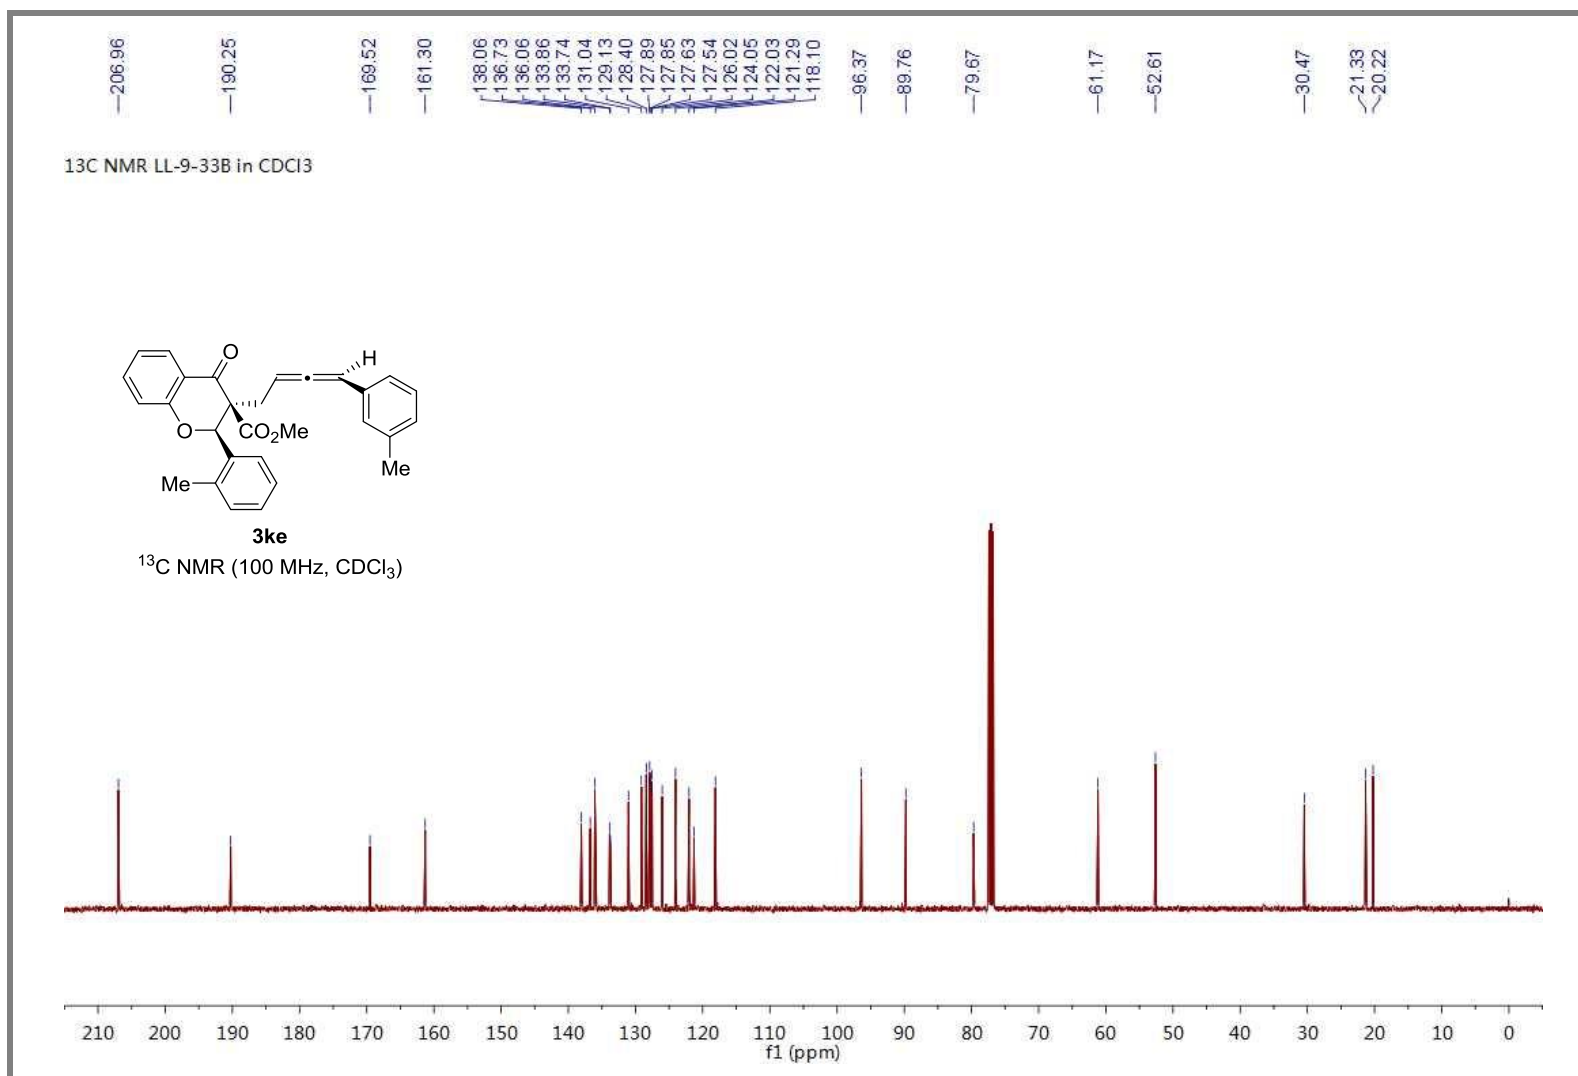

Data File C:\CHEM32\1\DATA\ZHOU-22\YZN020800.D  
 Sample Name: LL-9-33B +/-

=====  
 Acq. Operator :  
 Acq. Instrument : Instrument 1 Location : -  
 Injection Date : 3/21/2022 9:16:41 PM  
 Acq. Method : C:\CHEM32\1\METHODS\DEF\_LC.M  
 Last changed : 3/21/2022 9:14:25 PM  
 (modified after loading)  
 Analysis Method : C:\CHEM32\1\METHODS\DEF\_LC.M  
 Last changed : 3/23/2022 2:31:47 AM  
 (modified after loading)  
 Sample Info : AD-H, Hexane/i-PrOH = 97/3, 1.0 mL/min, 30 oC, 254 nm

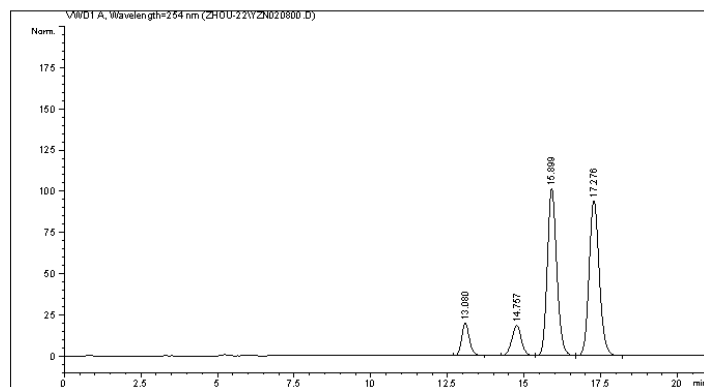

=====  
 Area Percent Report  
 =====

Sorted By : Signal  
 Multiplier: : 1.0000  
 Dilution: : 1.0000  
 Use Multiplier & Dilution Factor with ISTDs

Signal 1: WVD1 A, Wavelength=254 nm

| Peak # | RetTime [min] | Type | Width [min] | Area [mAU*s] | Height [mAU] | Area %  |
|--------|---------------|------|-------------|--------------|--------------|---------|
| 1      | 13.080        | VV   | 0.2688      | 349.19962    | 19.90305     | 6.8548  |
| 2      | 14.757        | VV   | 0.3283      | 400.72632    | 18.51077     | 7.8663  |
| 3      | 15.899        | VV   | 0.3288      | 2171.24585   | 101.26318    | 42.6215 |
| 4      | 17.276        | VB   | 0.3564      | 2173.07373   | 94.22297     | 42.6574 |

Totals : 5094.24551 233.89997

=====  
 \*\*\* End of Report \*\*\*

Instrument 1 3/23/2022 2:31:47 AM

Page 1 of 1

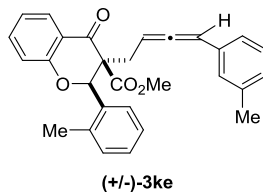

Data File C:\CHEM32\1\DATA\ZHOU-22\YZN020813.D  
 Sample Name: LL-9-33B

=====  
 Acq. Operator :  
 Acq. Instrument : Instrument 1 Location : -  
 Injection Date : 3/23/2022 2:02:39 AM  
 Acq. Method : C:\CHEM32\1\METHODS\DEF\_LC.M  
 Last changed : 3/23/2022 2:01:05 AM  
 (modified after loading)  
 Analysis Method : C:\CHEM32\1\METHODS\DEF\_LC.M  
 Last changed : 3/30/2022 3:12:17 AM  
 (modified after loading)  
 Sample Info : AD-H, Hexane/i-PrOH = 97/3, 1.0 mL/min, 30 oC, 254 nm

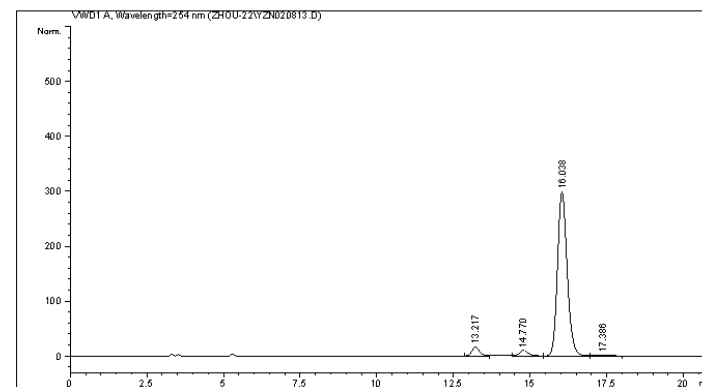

=====  
 Area Percent Report  
 =====

Sorted By : Signal  
 Multiplier: : 1.0000  
 Dilution: : 1.0000  
 Use Multiplier & Dilution Factor with ISTDs

Signal 1: WVD1 A, Wavelength=254 nm

| Peak # | RetTime [min] | Type | Width [min] | Area [mAU*s] | Height [mAU] | Area %  |
|--------|---------------|------|-------------|--------------|--------------|---------|
| 1      | 13.217        | EV   | 0.2721      | 283.35965    | 16.11409     | 4.0129  |
| 2      | 14.770        | VV   | 0.3024      | 196.67789    | 9.86794      | 2.7853  |
| 3      | 16.038        | VV   | 0.3399      | 6539.77539   | 298.73343    | 92.6143 |
| 4      | 17.386        | VB   | 0.3877      | 41.48568     | 1.61131      | 0.5875  |

Totals : 7061.29861 326.32676

=====  
 \*\*\* End of Report \*\*\*

Instrument 1 3/30/2022 3:12:20 AM

Page 1 of 1

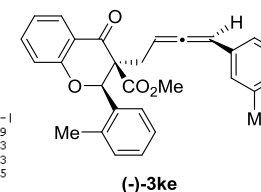

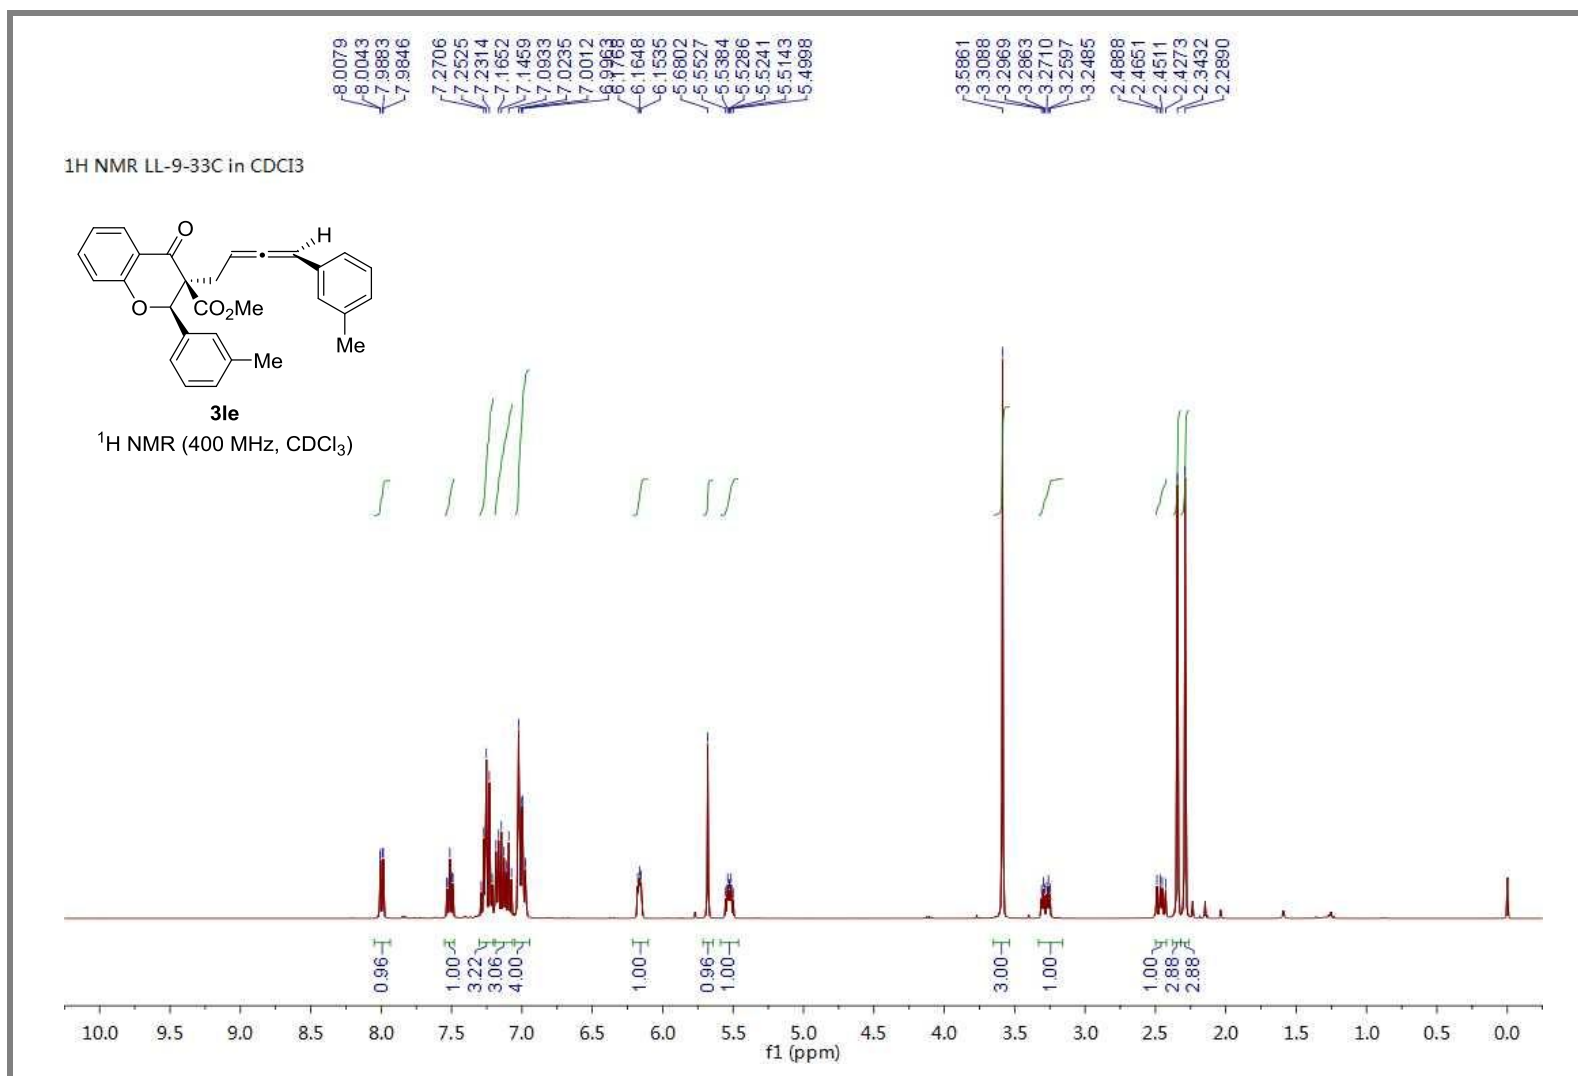



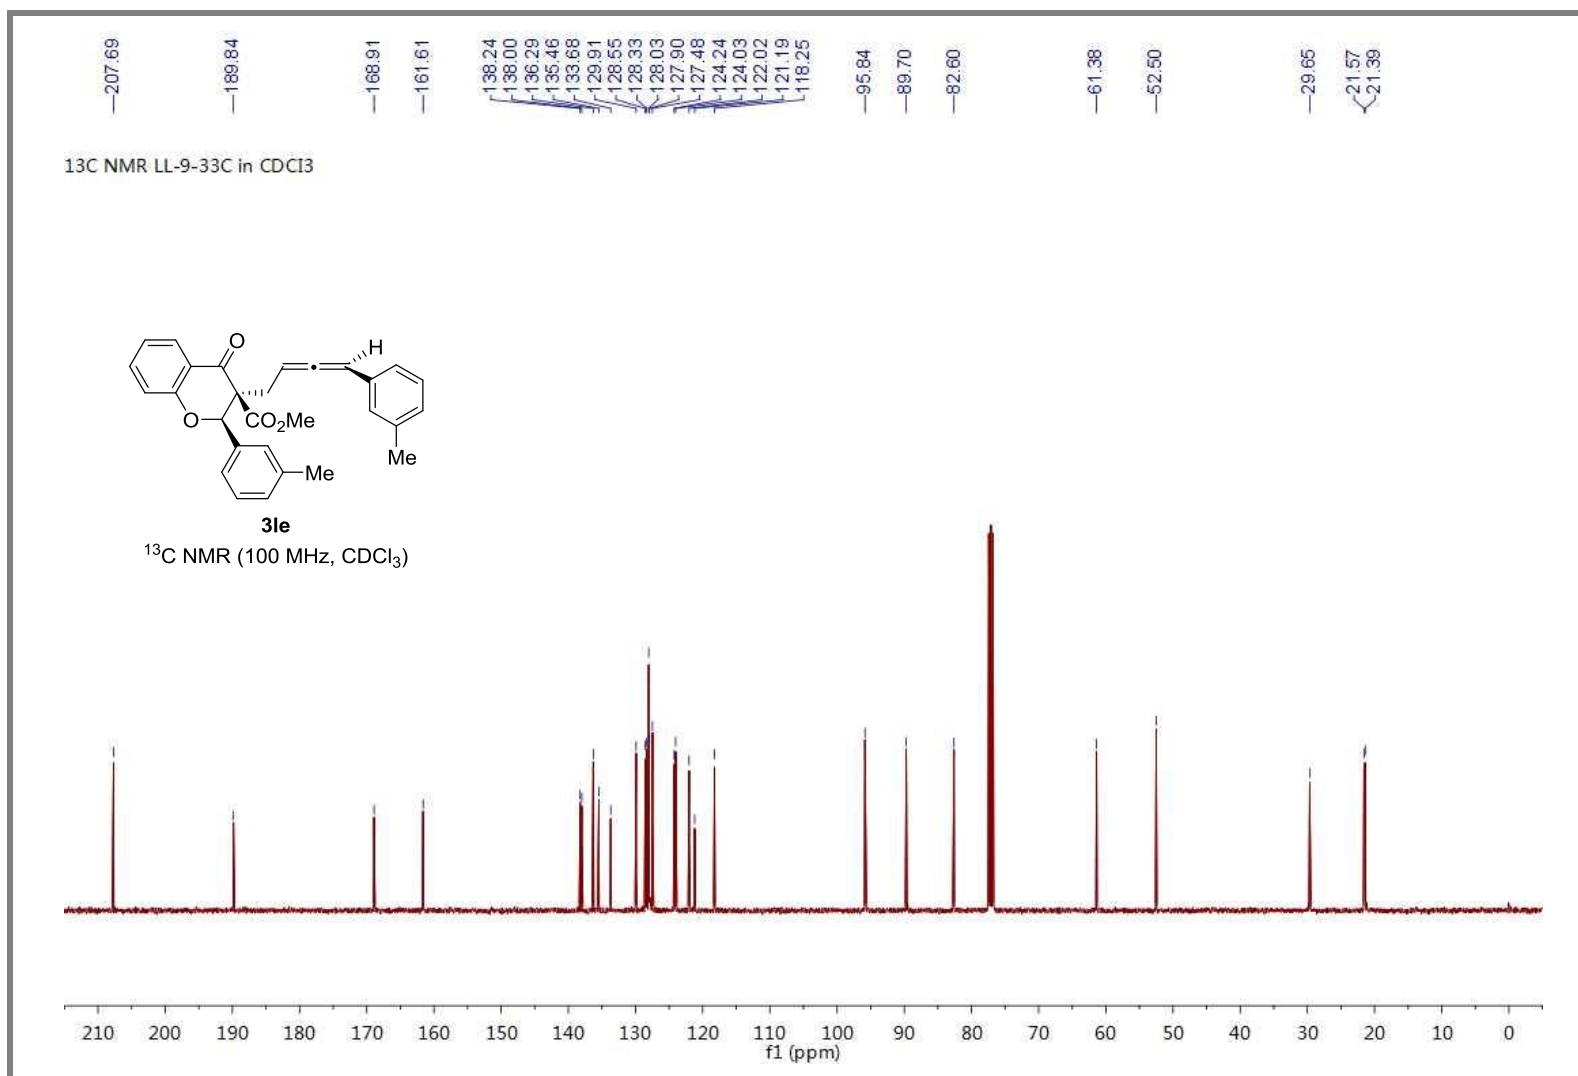

Data File C:\CHEM32\1\DATA\ZHOU-22\YZN020801.D  
 Sample Name: LL-9-33C +/-

=====  
 Acq. Operator :  
 Acq. Instrument : Instrument 1 Location : -  
 Injection Date : 3/21/2022 9:46:05 PM  
 Acq. Method : C:\CHEM32\1\METHODS\DEF\_LC.M  
 Last changed : 3/21/2022 9:43:18 PM  
 (modified after loading)  
 Analysis Method : C:\CHEM32\1\METHODS\DEF\_LC.M  
 Last changed : 3/23/2022 2:52:19 AM  
 (modified after loading)  
 Sample Info : AD-H, Hexane/i-PrOH = 97/3, 1.0 mL/min, 30 oC, 254 nm

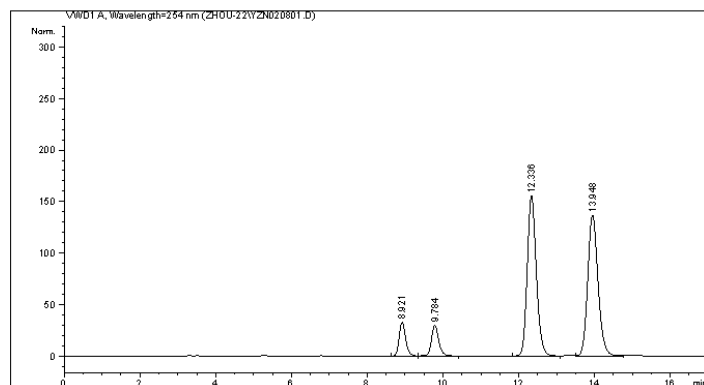

=====  
 Area Percent Report  
 =====

Sorted By : Signal  
 Multiplier: : 1.0000  
 Dilution: : 1.0000  
 Use Multiplier & Dilution Factor with ISTDs

Signal 1: WVD1 A, Wavelength=254 nm

| Peak # | RetTime [min] | Type | Width [min] | Area [mAU*s] | Height [mAU] | Area %  |
|--------|---------------|------|-------------|--------------|--------------|---------|
| 1      | 8.921         | BV   | 0.1816      | 388.22244    | 32.83931     | 6.5050  |
| 2      | 9.784         | VB   | 0.2028      | 397.62344    | 29.97575     | 6.6626  |
| 3      | 12.336        | BV   | 0.2583      | 2589.84790   | 155.56494    | 43.3953 |
| 4      | 13.948        | VV   | 0.2909      | 2592.34204   | 136.83603    | 43.4371 |

Totals : 5968.03583 355.21602

=====  
 \*\*\* End of Report \*\*\*

Instrument 1 3/23/2022 2:52:29 AM

Page 1 of 1

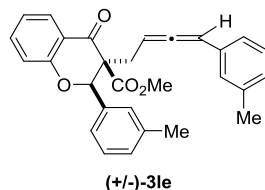

Data File C:\CHEM32\1\DATA\ZHOU-22\YZN020814.D  
 Sample Name: LL-9-33C

=====  
 Acq. Operator :  
 Acq. Instrument : Instrument 1 Location : -  
 Injection Date : 3/23/2022 2:34:22 AM  
 Acq. Method : C:\CHEM32\1\METHODS\DEF\_LC.M  
 Last changed : 3/23/2022 2:29:56 AM  
 (modified after loading)  
 Analysis Method : C:\CHEM32\1\METHODS\DEF\_LC.M  
 Last changed : 6/15/2022 4:32:15 AM  
 (modified after loading)  
 Sample Info : AD-H, Hexane/i-PrOH = 97/3, 1.0 mL/min, 30 oC, 254 nm

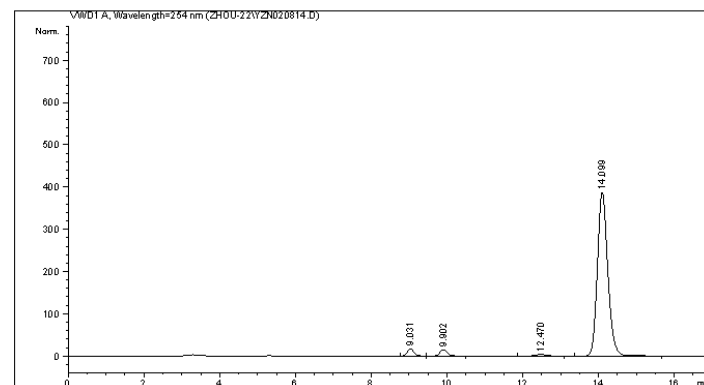

=====  
 Area Percent Report  
 =====

Sorted By : Signal  
 Multiplier: : 1.0000  
 Dilution: : 1.0000  
 Use Multiplier & Dilution Factor with ISTDs

Signal 1: WVD1 A, Wavelength=254 nm

| Peak # | RetTime [min] | Type | Width [min] | Area [mAU*s] | Height [mAU] | Area %  |
|--------|---------------|------|-------------|--------------|--------------|---------|
| 1      | 9.031         | BV   | 0.1839      | 208.25015    | 17.33076     | 2.6406  |
| 2      | 9.902         | VB   | 0.2099      | 202.37326    | 14.72315     | 2.5660  |
| 3      | 12.470        | BB   | 0.2745      | 69.80332     | 3.86965      | 0.8851  |
| 4      | 14.099        | BB   | 0.2929      | 7406.14648   | 387.51746    | 93.9083 |

Totals : 7886.57322 423.44101

=====  
 \*\*\* End of Report \*\*\*

Instrument 1 6/15/2022 4:32:29 AM

Page 1 of 1

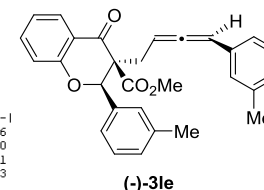

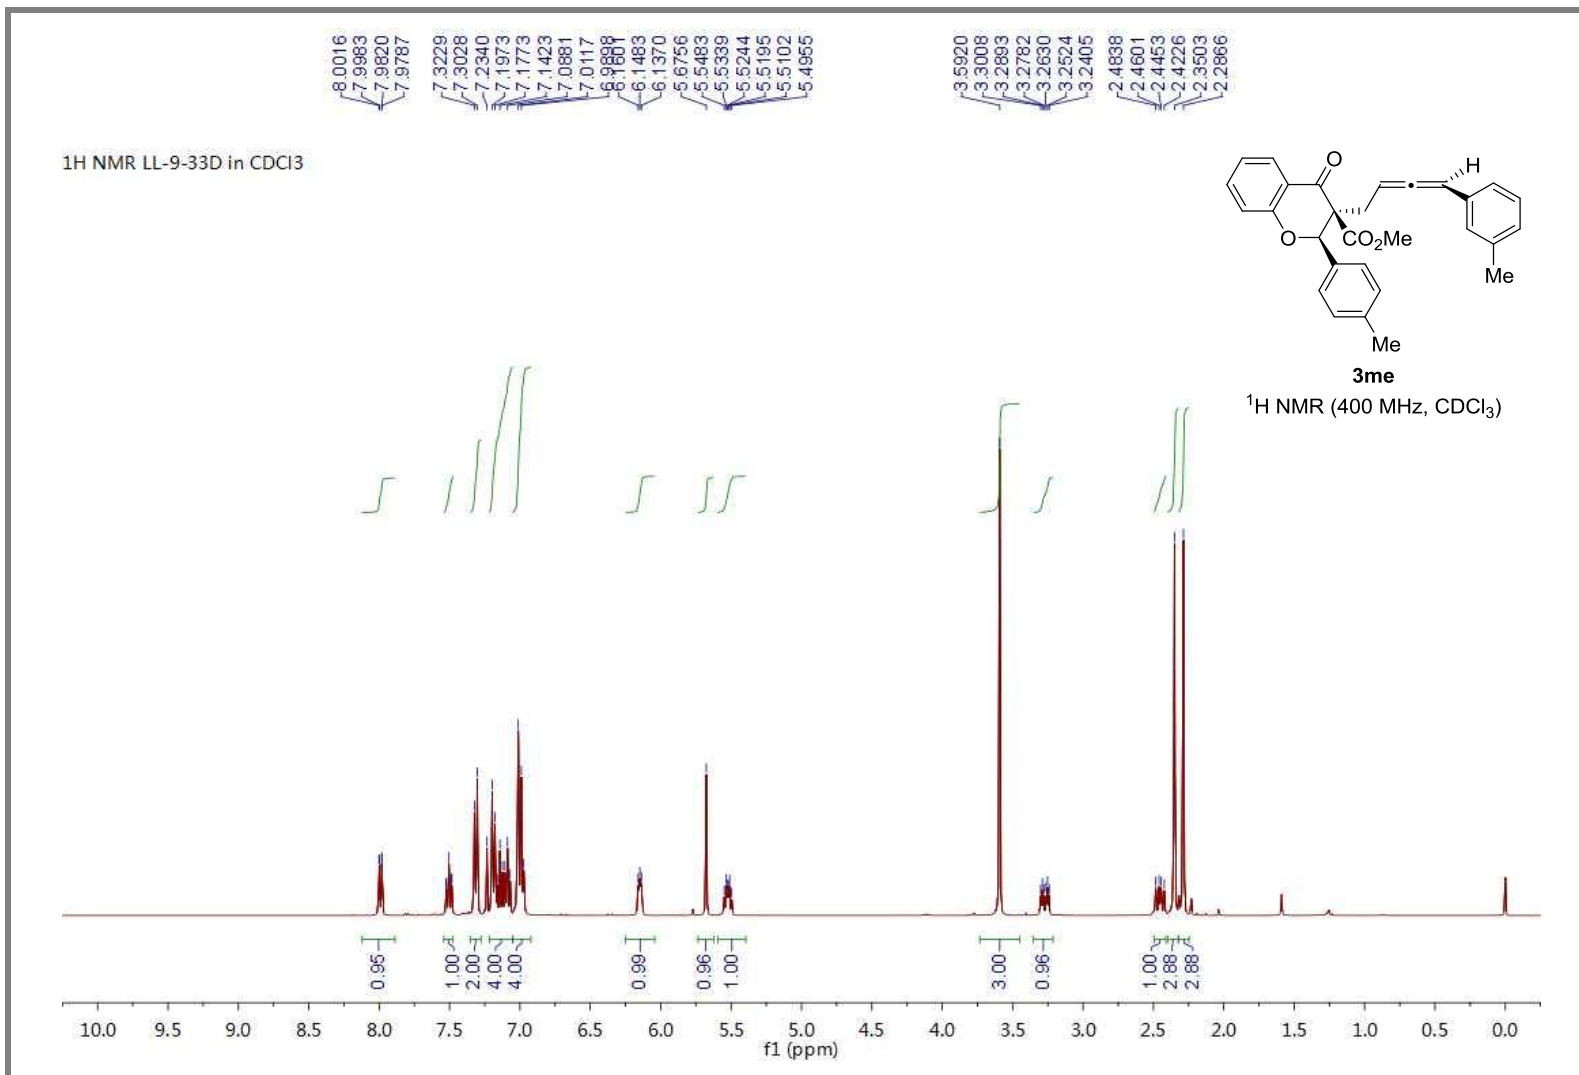

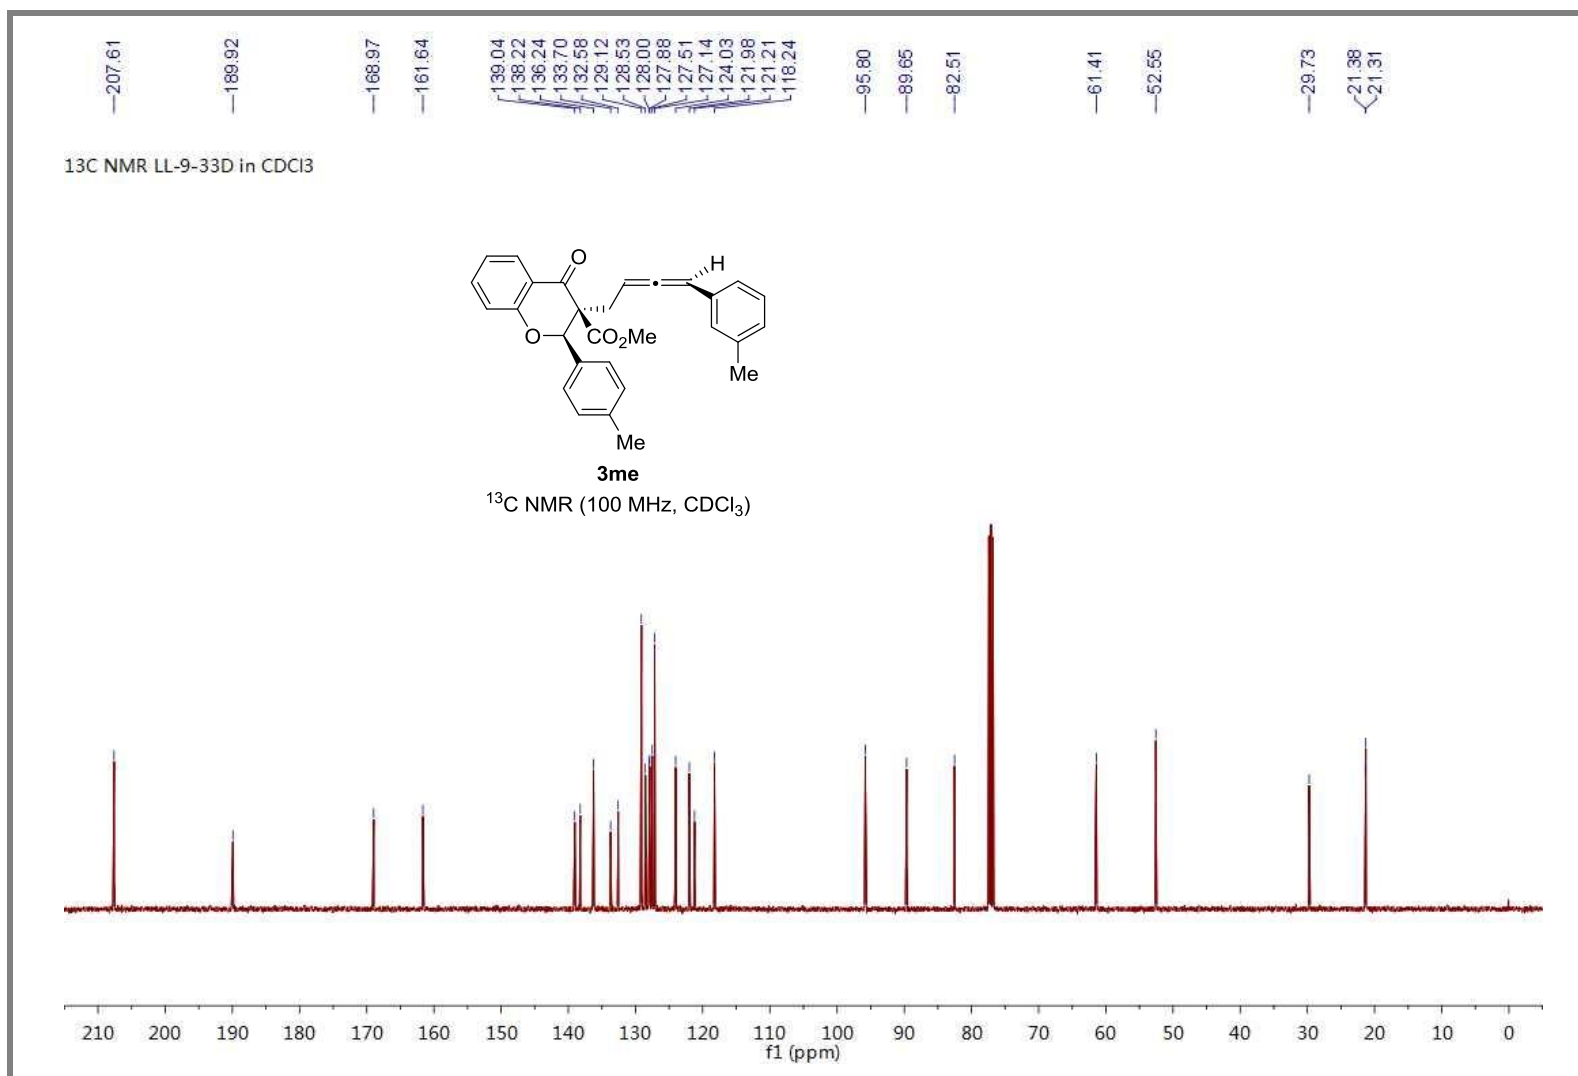

Data File C:\CHEM32\1\DATA\ZHOU-22\YZN020802.D  
 Sample Name: LL-9-33D +/-

=====  
 Acq. Operator :  
 Acq. Instrument : Instrument 1 Location : -  
 Injection Date : 3/21/2022 10:05:06 PM  
 Acq. Method : C:\CHEM32\1\METHODS\DEF\_LC.M  
 Last changed : 3/21/2022 10:03:11 PM  
 (modified after loading)  
 Analysis Method : C:\CHEM32\1\METHODS\DEF\_LC.M  
 Last changed : 3/23/2022 3:23:06 AM  
 (modified after loading)  
 Sample Info : AD-H, Hexane/i-PrOH = 97/3, 1.0 mL/min, 30 oC, 254 nm

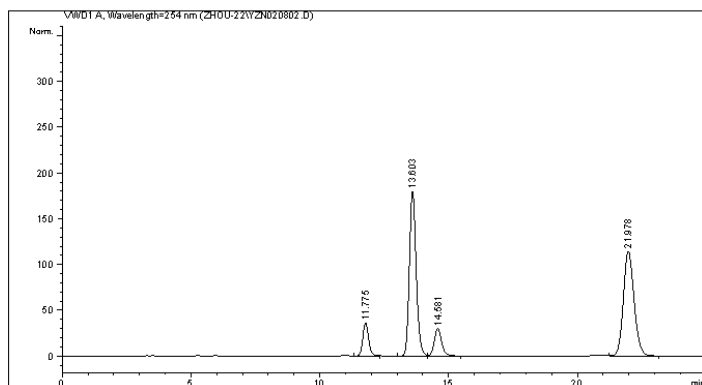

=====  
 Area Percent Report  
 =====

Sorted By : Signal  
 Multiplier: : 1.0000  
 Dilution: : 1.0000  
 Use Multiplier & Dilution Factor with ISTDs

Signal 1: WVD1 A, Wavelength=254 nm

| Peak # | RetTime [min] | Type | Width [min] | Area mAU   | Height *s | Area [mAU] | Area % |
|--------|---------------|------|-------------|------------|-----------|------------|--------|
| 1      | 11.775        | VB   | 0.2399      | 563.10925  | 36.16396  | 7.2382     |        |
| 2      | 13.603        | VB   | 0.2831      | 3315.15112 | 180.14198 | 42.6129    |        |
| 3      | 14.581        | VB   | 0.3028      | 588.46716  | 29.85586  | 7.5641     |        |
| 4      | 21.978        | VB   | 0.4451      | 3312.97021 | 114.57842 | 42.5848    |        |

Totals : 7779.69775 360.74022

=====  
 \*\*\* End of Report \*\*\*

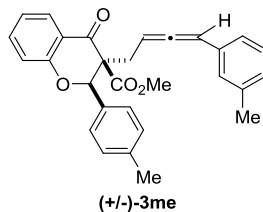

Data File C:\CHEM32\1\DATA\ZHOU-22\YZN020815.D  
 Sample Name: LL-9-33D

=====  
 Acq. Operator :  
 Acq. Instrument : Instrument 1 Location : -  
 Injection Date : 3/23/2022 2:56:01 AM  
 Acq. Method : C:\CHEM32\1\METHODS\DEF\_LC.M  
 Last changed : 3/23/2022 2:52:50 AM  
 (modified after loading)  
 Analysis Method : C:\CHEM32\1\METHODS\DEF\_LC.M  
 Last changed : 6/15/2022 4:36:51 AM  
 (modified after loading)  
 Sample Info : AD-H, Hexane/i-PrOH = 97/3, 1.0 mL/min, 30 oC, 254 nm

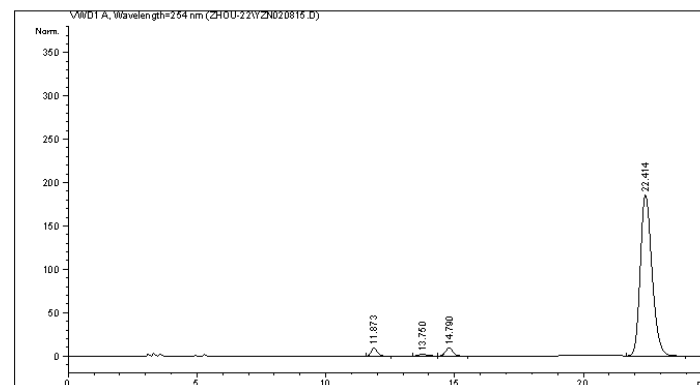

=====  
 Area Percent Report  
 =====

Sorted By : Signal  
 Multiplier: : 1.0000  
 Dilution: : 1.0000  
 Use Multiplier & Dilution Factor with ISTDs

Signal 1: WVD1 A, Wavelength=254 nm

| Peak # | RetTime [min] | Type | Width [min] | Area mAU   | Height *s | Area [mAU] | Area % |
|--------|---------------|------|-------------|------------|-----------|------------|--------|
| 1      | 11.873        | EB   | 0.2422      | 151.93513  | 9.63317   | 2.4237     |        |
| 2      | 13.750        | VB   | 0.3152      | 51.64087   | 2.45618   | 0.8238     |        |
| 3      | 14.790        | VB   | 0.3130      | 184.72479  | 9.19614   | 2.9468     |        |
| 4      | 22.414        | VB   | 0.4891      | 5880.36475 | 185.57999 | 93.8057    |        |

Totals : 6268.66554 206.86547

=====  
 \*\*\* End of Report \*\*\*

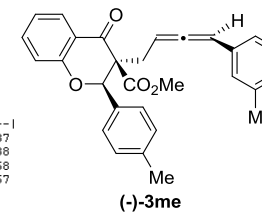

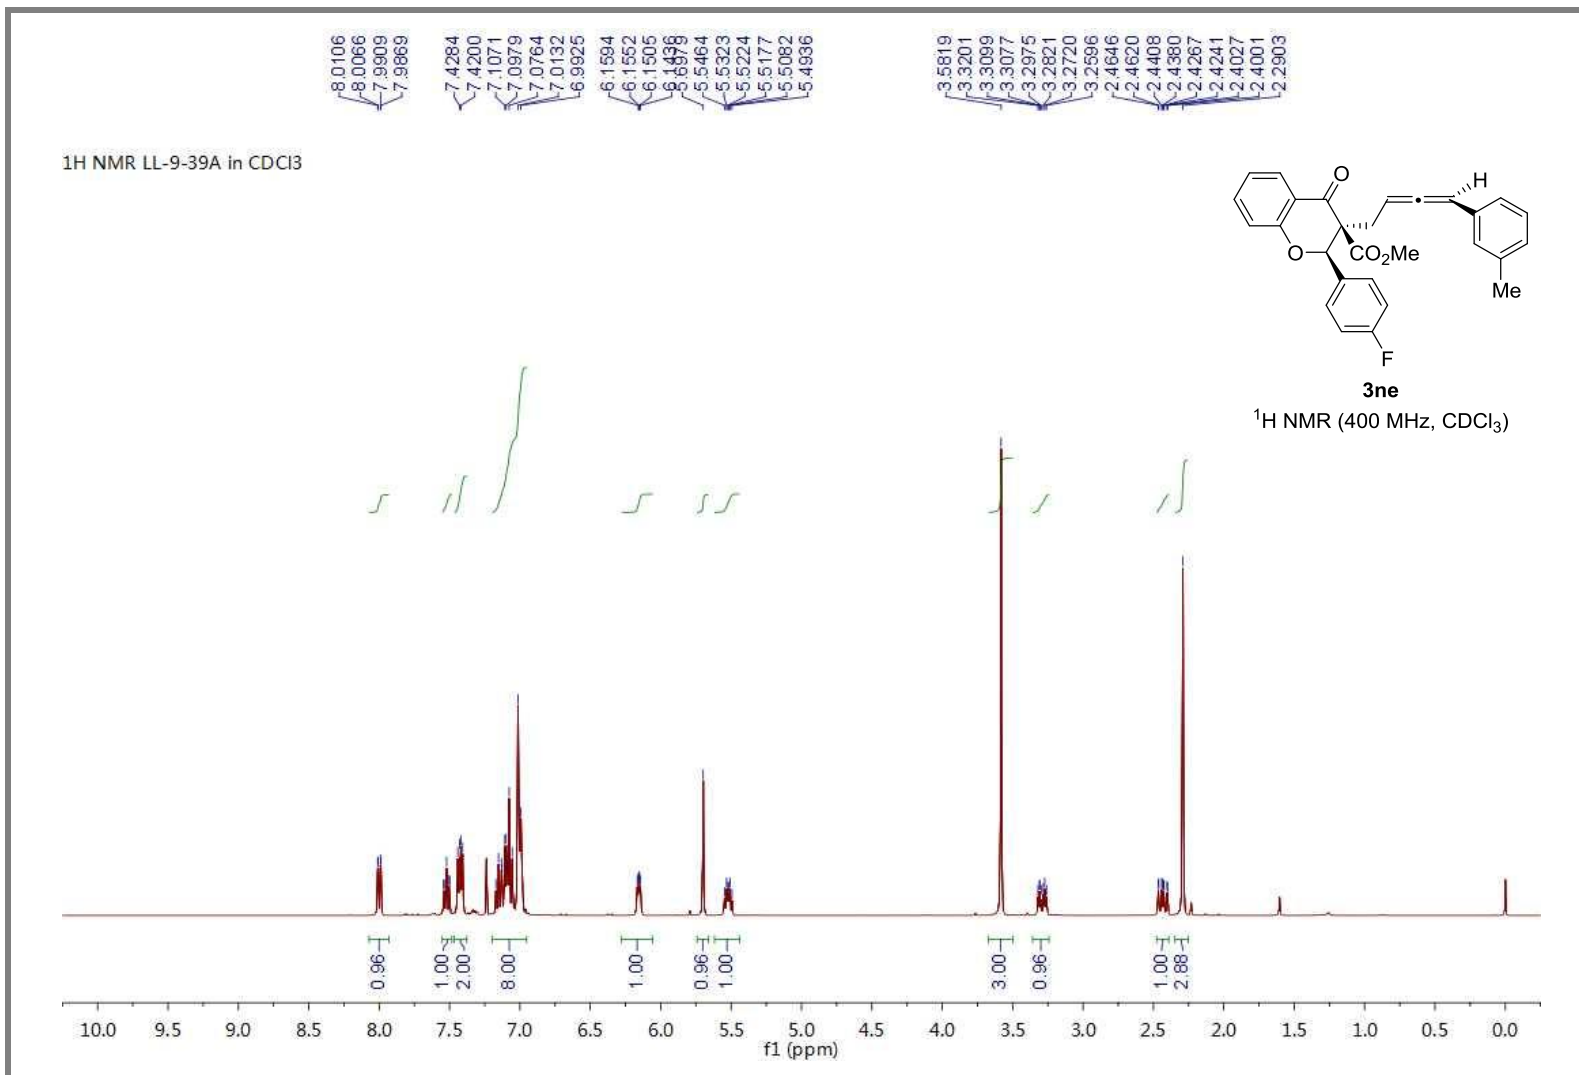

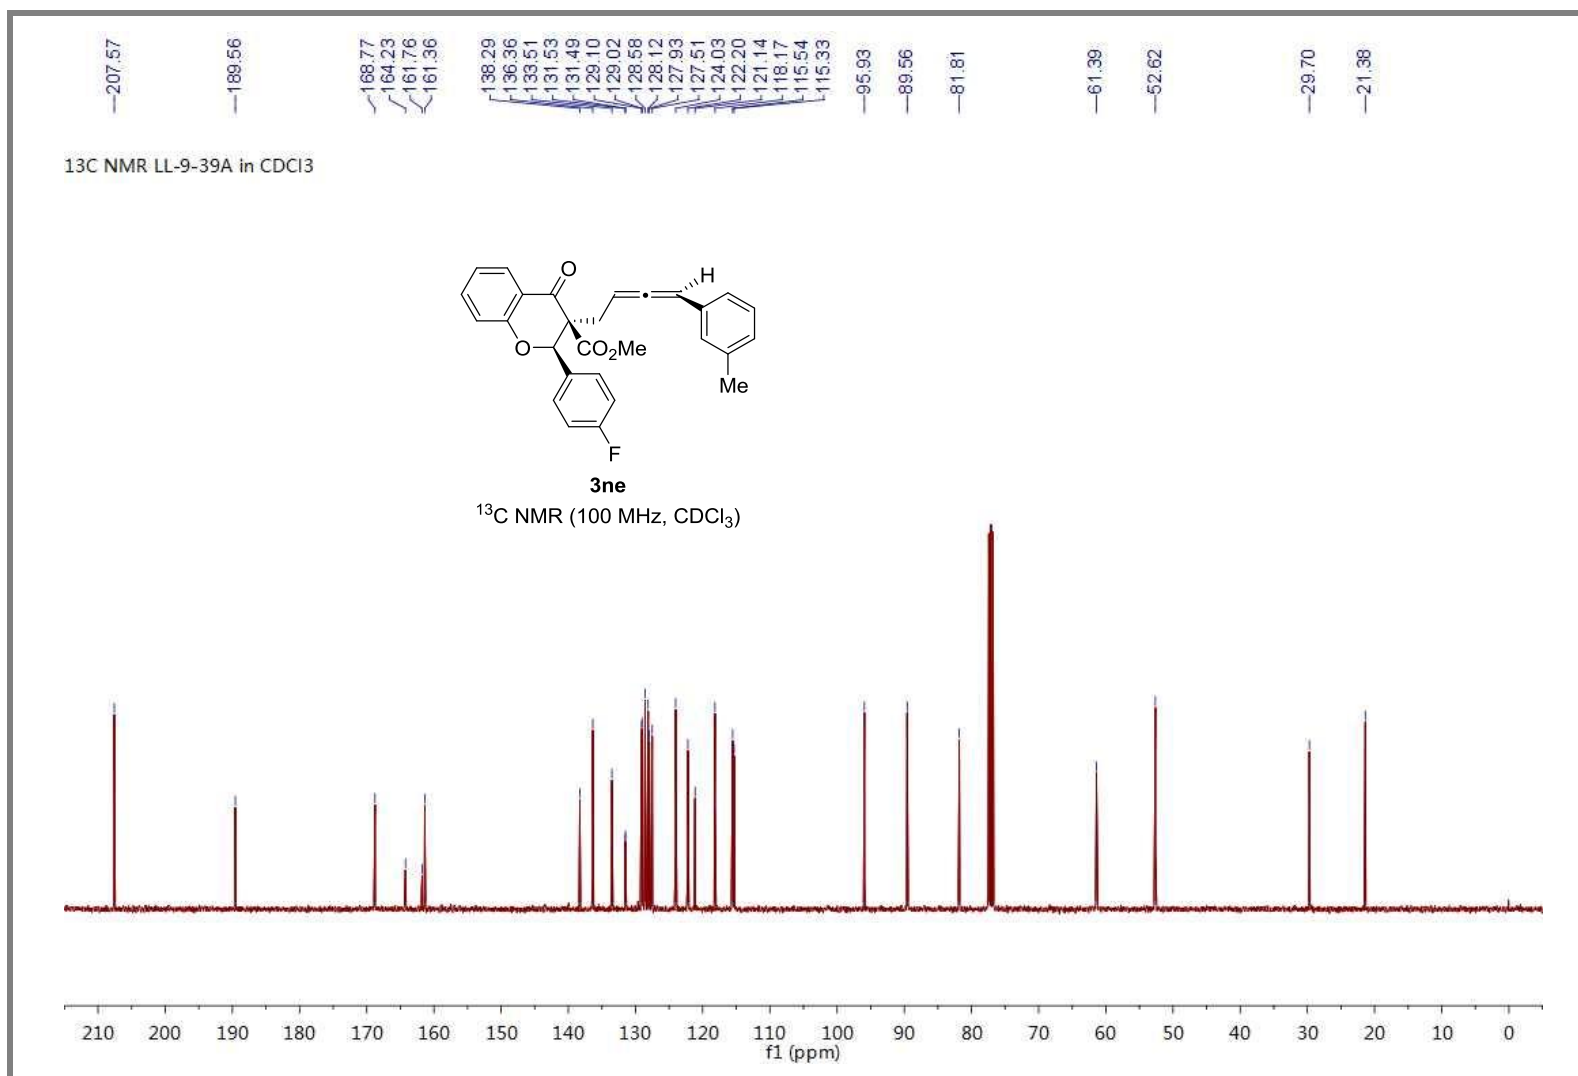

<sup>19</sup>F NMR LL-9-39A in CDCl<sub>3</sub>

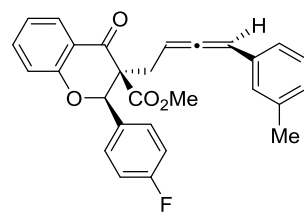

**3ne**

<sup>19</sup>F NMR (376 MHz, CDCl<sub>3</sub>)

-112.0896

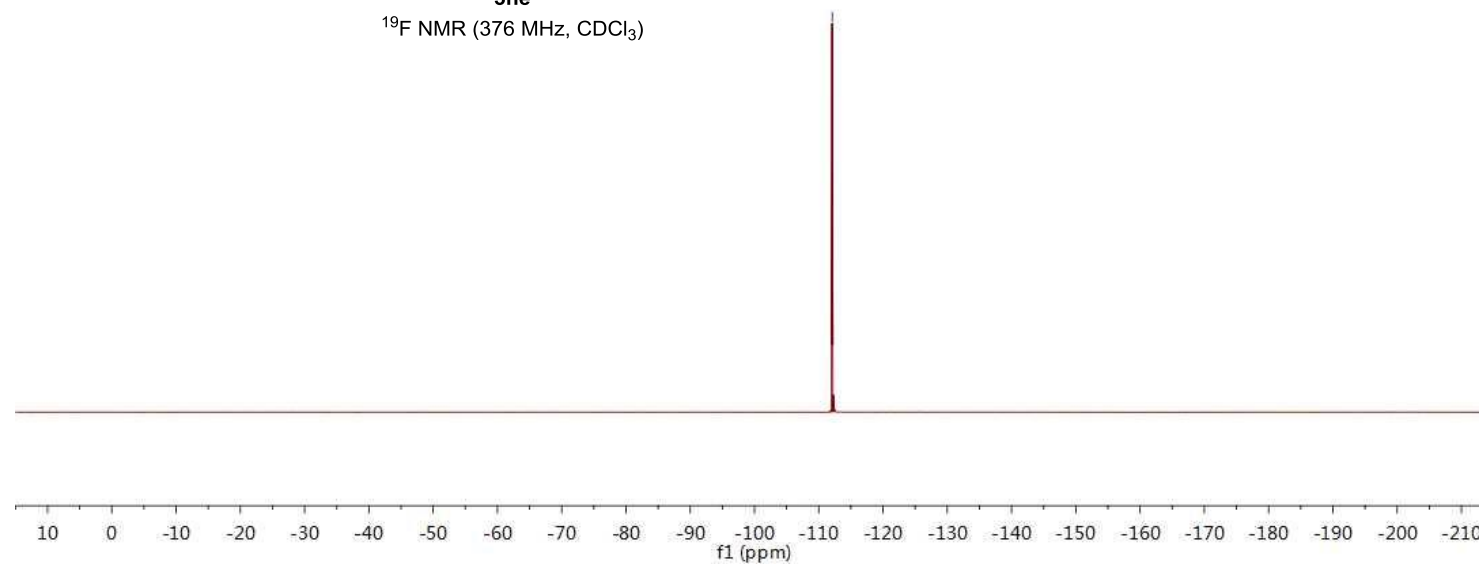



Data File C:\CHEM32\1\DATA\ZHOU-22\YZN020875.D  
 Sample Name: LL-9-39A +/-

=====  
 Acq. Operator :  
 Acq. Instrument : Instrument 1 Location : -  
 Injection Date : 3/30/2022 3:37:44 AM  
 Acq. Method : C:\CHEM32\1\METHODS\DEF\_LC.M  
 Last changed : 3/30/2022 3:35:57 AM  
 (modified after loading)  
 Analysis Method : C:\CHEM32\1\METHODS\DEF\_LC.M  
 Last changed : 3/30/2022 4:22:58 AM  
 (modified after loading)  
 Sample Info : ID, Hexane/i-PrOH = 97/3, 1.0 mL/min, 30 oC, 254 nm

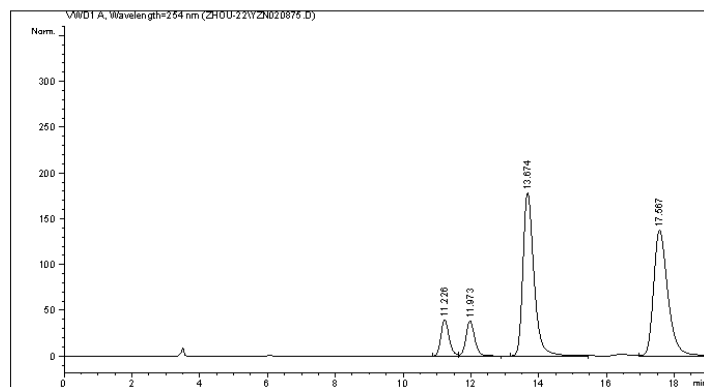

=====  
 Area Percent Report  
 =====

Sorted By : Signal  
 Multiplier: : 1.0000  
 Dilution: : 1.0000  
 Use Multiplier & Dilution Factor with ISTDs

Signal 1: WVD1 A, Wavelength=254 nm

| Peak # | RetTime [min] | Type | Width [min] | Area [mAU*s] | Height [mAU] | Area %  |
|--------|---------------|------|-------------|--------------|--------------|---------|
| 1      | 11.226        | BV   | 0.2543      | 659.95746    | 39.86446     | 7.0423  |
| 2      | 11.973        | VB   | 0.2749      | 685.86603    | 38.49050     | 7.3187  |
| 3      | 13.674        | BB   | 0.3450      | 4022.82959   | 178.11646    | 42.9267 |
| 4      | 17.567        | VB   | 0.4419      | 4002.73682   | 137.34512    | 42.7123 |

Totals : 9371.38989 393.81653

=====  
 \*\*\* End of Report \*\*\*

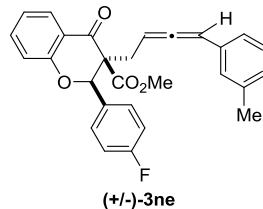

Data File C:\CHEM32\1\DATA\ZHOU-22\YZN020870.D  
 Sample Name: LL-9-39A

=====  
 Acq. Operator :  
 Acq. Instrument : Instrument 1 Location : -  
 Injection Date : 3/30/2022 2:10:48 AM  
 Acq. Method : C:\CHEM32\1\METHODS\DEF\_LC.M  
 Last changed : 3/30/2022 2:09:10 AM  
 (modified after loading)  
 Analysis Method : C:\CHEM32\1\METHODS\DEF\_LC.M  
 Last changed : 3/30/2022 4:23:59 AM  
 (modified after loading)  
 Sample Info : ID, Hexane/i-PrOH = 97/3, 1.0 mL/min, 30 oC, 254 nm

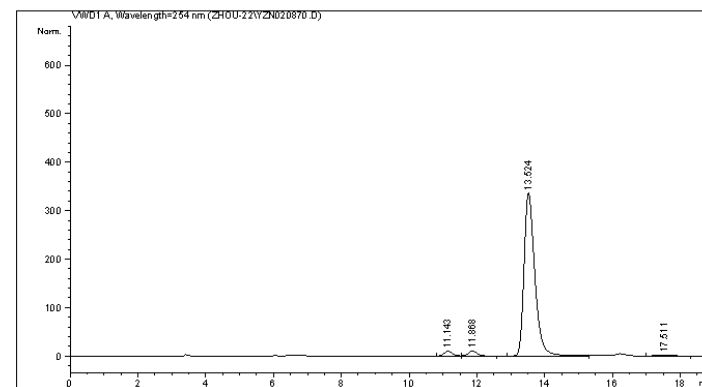

=====  
 Area Percent Report  
 =====

Sorted By : Signal  
 Multiplier: : 1.0000  
 Dilution: : 1.0000  
 Use Multiplier & Dilution Factor with ISTDs

Signal 1: WVD1 A, Wavelength=254 nm

| Peak # | RetTime [min] | Type | Width [min] | Area [mAU*s] | Height [mAU] | Area %  |
|--------|---------------|------|-------------|--------------|--------------|---------|
| 1      | 11.143        | BV   | 0.2503      | 162.96674    | 10.04978     | 2.0748  |
| 2      | 11.868        | VB   | 0.2712      | 192.18999    | 10.82592     | 2.4468  |
| 3      | 13.524        | BB   | 0.3364      | 7429.46289   | 336.24368    | 94.5867 |
| 4      | 17.511        | BB   | 0.4513      | 70.03980     | 2.35823      | 0.8917  |

Totals : 7854.65942 359.47761

=====  
 \*\*\* End of Report \*\*\*

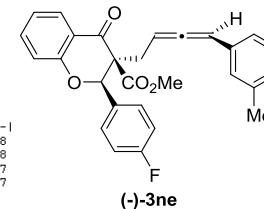

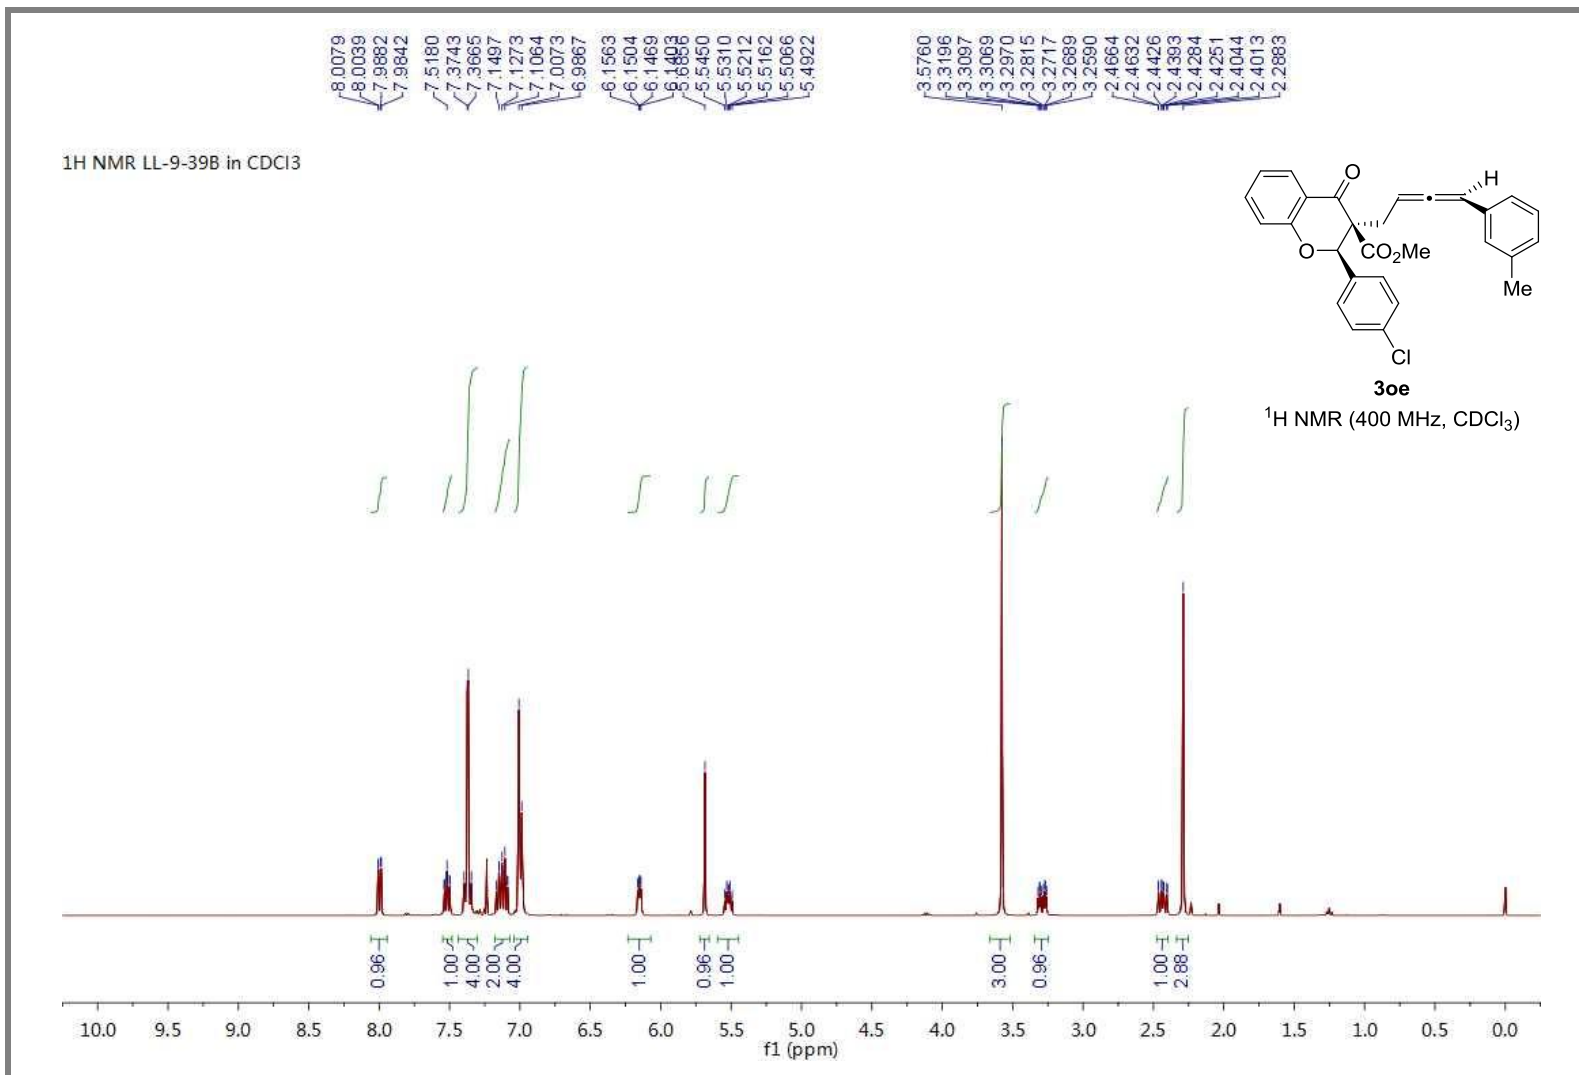

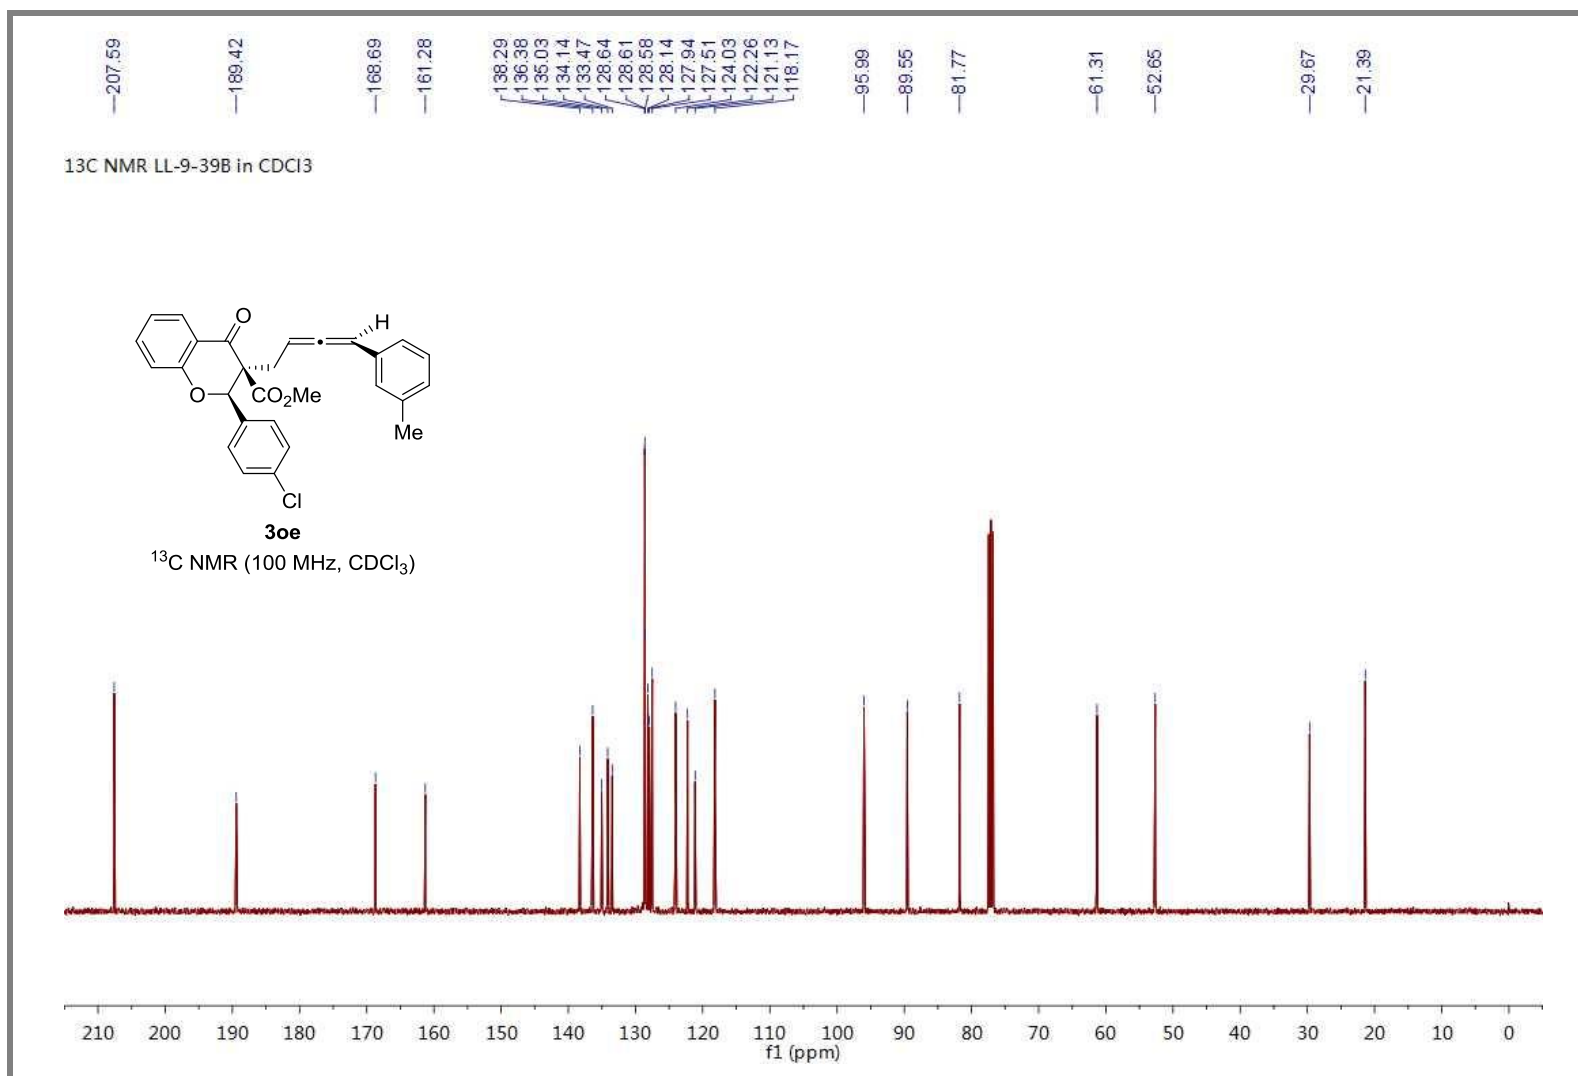

Data File C:\CHEM32\1\DATA\ZHOU-22\YZN020873.D  
 Sample Name: LL-9-39B +/-

=====  
 Acq. Operator :  
 Acq. Instrument : Instrument 1 Location : -  
 Injection Date : 3/30/2022 2:52:41 AM  
 Acq. Method : C:\CHEM32\1\METHODS\DEF\_LC.M  
 Last changed : 3/30/2022 2:51:20 AM  
 (modified after loading)  
 Analysis Method : C:\CHEM32\1\METHODS\DEF\_LC.M  
 Last changed : 3/30/2022 4:29:05 AM  
 (modified after loading)  
 Sample Info : ID, Hexane/i-PrOH = 97/3, 1.0 mL/min, 30 oC, 254 nm

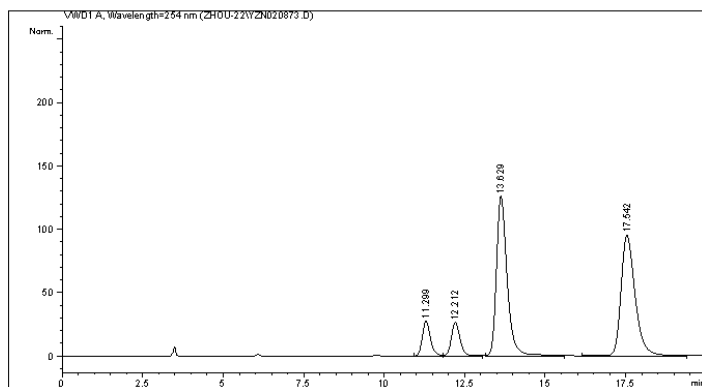

=====  
 Area Percent Report  
 =====

Sorted By : Signal  
 Multiplier: : 1.0000  
 Dilution: : 1.0000  
 Use Multiplier & Dilution Factor with ISTDs

Signal 1: WVD1 A, Wavelength=254 nm

| Peak # | RetTime [min] | Type | Width [min] | Area [mAU*s] | Height [mAU] | Area %  |
|--------|---------------|------|-------------|--------------|--------------|---------|
| 1      | 11.289        | BV   | 0.2701      | 484.30914    | 27.42727     | 7.0920  |
| 2      | 12.212        | VB   | 0.2909      | 499.88123    | 26.39233     | 7.3200  |
| 3      | 13.629        | BB   | 0.3519      | 2918.70996   | 125.94702    | 42.7402 |
| 4      | 17.542        | BB   | 0.4661      | 2926.05200   | 95.25815     | 42.8477 |

Totals : 6828.95233 275.02478

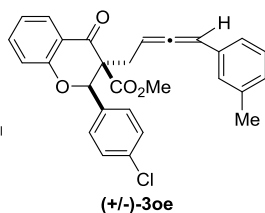

=====  
 \*\*\* End of Report \*\*\*

Data File C:\CHEM32\1\DATA\ZHOU-22\YZN020876.D  
 Sample Name: LL-9-39B

=====  
 Acq. Operator :  
 Acq. Instrument : Instrument 1 Location : -  
 Injection Date : 3/30/2022 4:04:35 AM  
 Acq. Method : C:\CHEM32\1\METHODS\DEF\_LC.M  
 Last changed : 3/30/2022 3:58:40 AM  
 (modified after loading)  
 Analysis Method : C:\CHEM32\1\METHODS\DEF\_LC.M  
 Last changed : 3/30/2022 4:29:05 AM  
 (modified after loading)  
 Sample Info : ID, Hexane/i-PrOH = 97/3, 1.0 mL/min, 30 oC, 254 nm

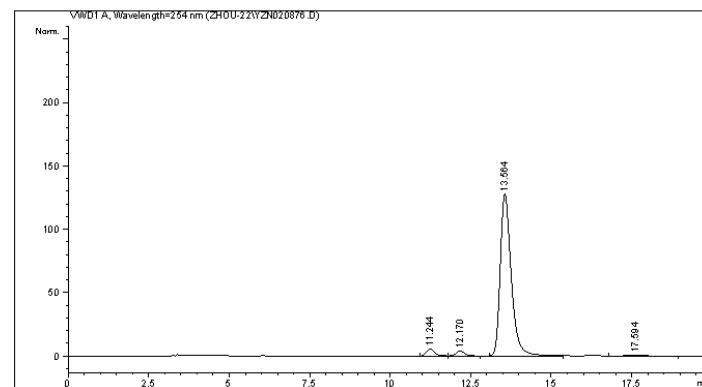

=====  
 Area Percent Report  
 =====

Sorted By : Signal  
 Multiplier: : 1.0000  
 Dilution: : 1.0000  
 Use Multiplier & Dilution Factor with ISTDs

Signal 1: WVD1 A, Wavelength=254 nm

| Peak # | RetTime [min] | Type | Width [min] | Area [mAU*s] | Height [mAU] | Area %  |
|--------|---------------|------|-------------|--------------|--------------|---------|
| 1      | 11.244        | BV   | 0.2763      | 99.79084     | 5.56123      | 3.0790  |
| 2      | 12.170        | VB   | 0.2960      | 72.66874     | 3.79805      | 2.2421  |
| 3      | 13.564        | BB   | 0.3621      | 3039.11841   | 127.68930    | 93.7697 |
| 4      | 17.594        | VB   | 0.5155      | 29.46769     | 8.74243e-1   | 0.9092  |

Totals : 3241.04567 137.92283

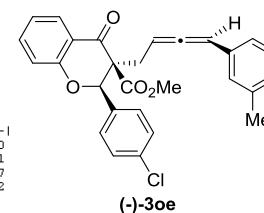

=====  
 \*\*\* End of Report \*\*\*

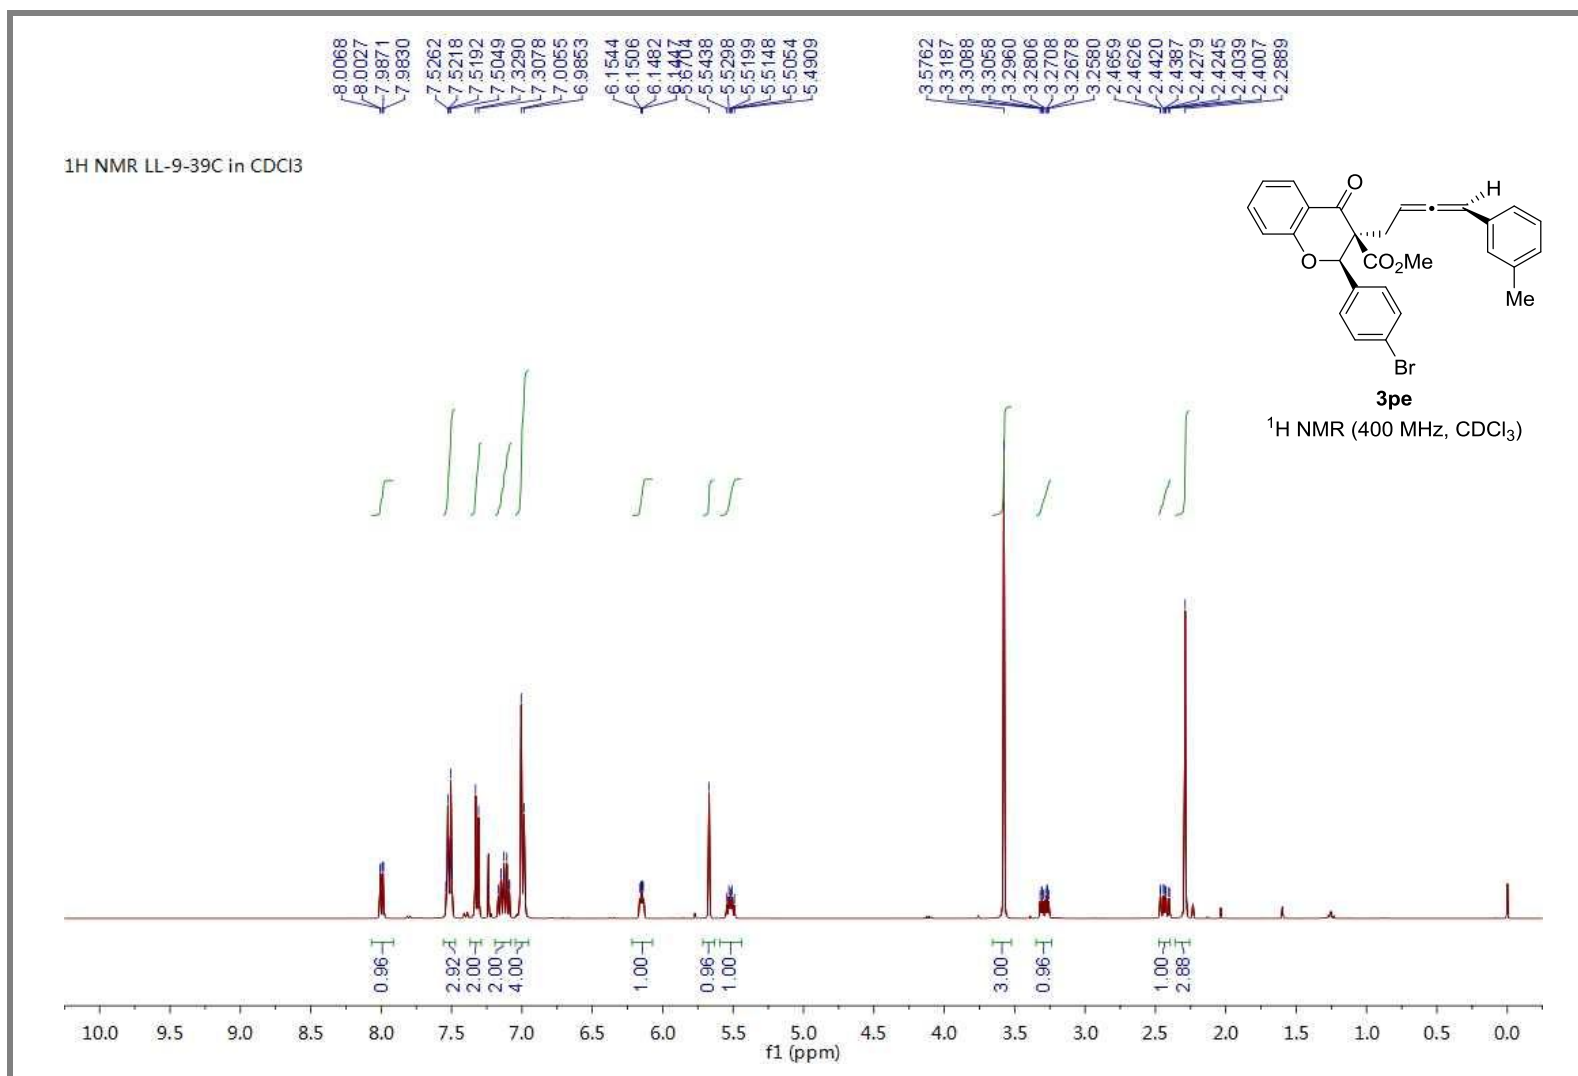

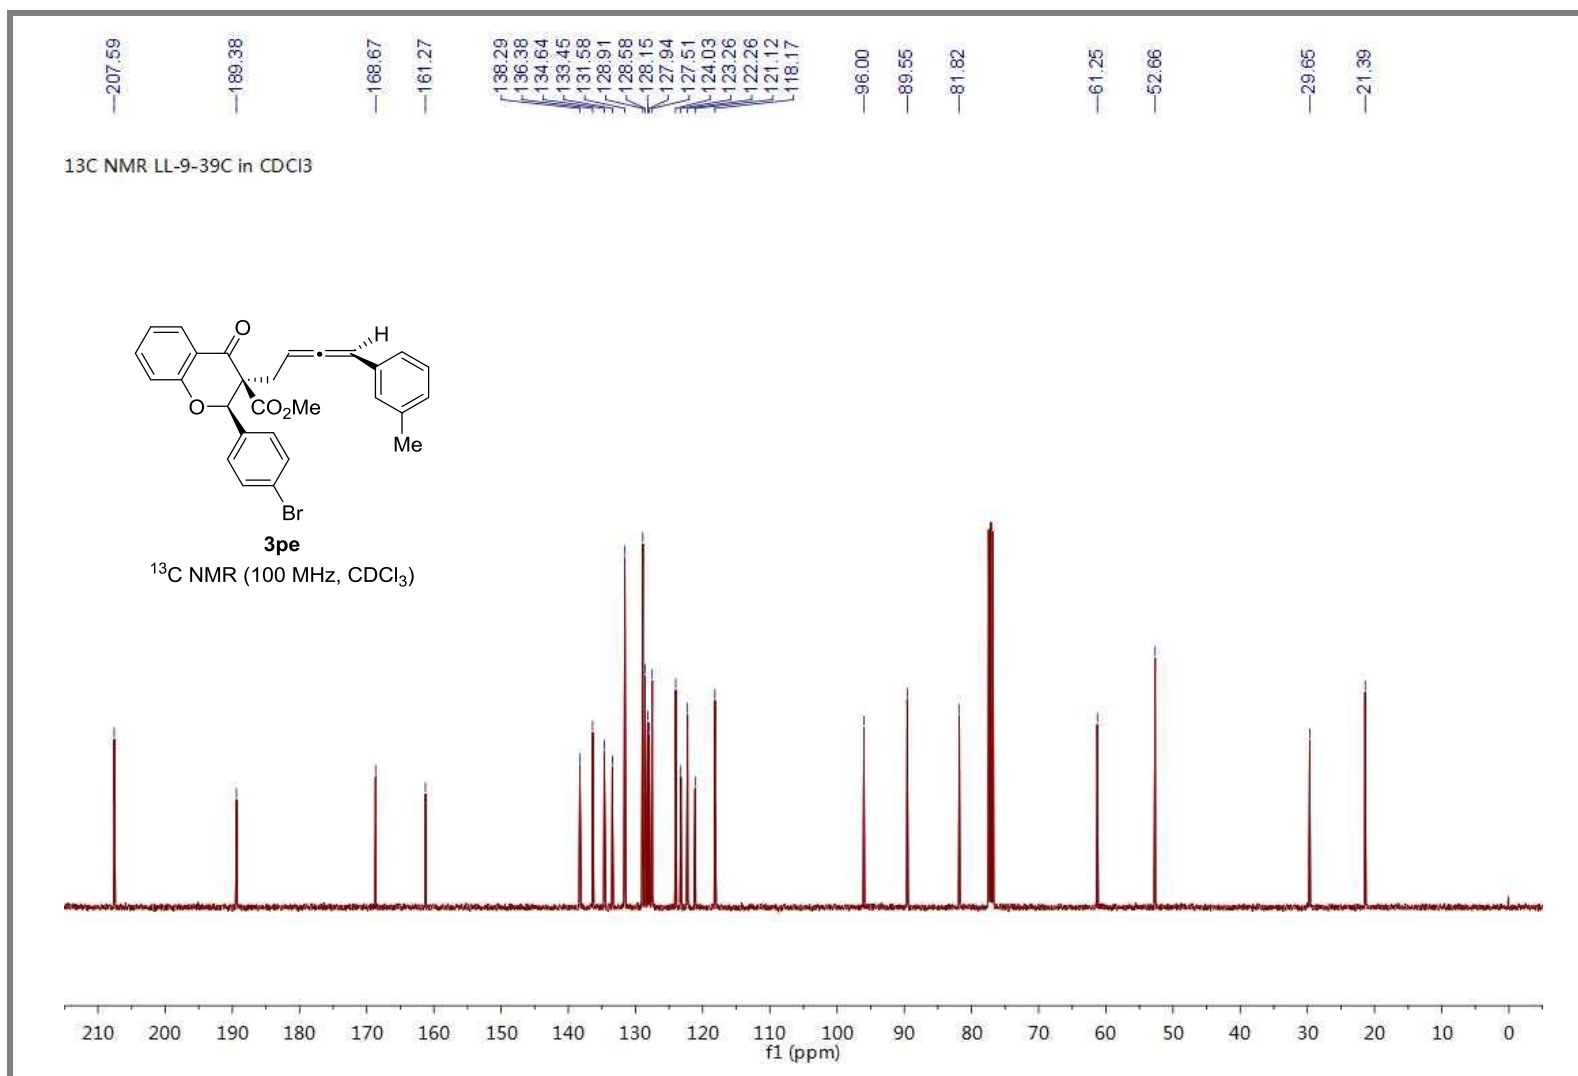

Data File C:\CHEM32\1\DATA\ZHOU-22\YZN020879.D  
 Sample Name: LL-9-39C +/-

=====  
 Acq. Operator :  
 Acq. Instrument : Instrument 1 Location : -  
 Injection Date : 3/30/2022 7:28:45 AM  
 Acq. Method : C:\CHEM32\1\METHODS\DEF\_LC.M  
 Last changed : 3/30/2022 7:27:14 AM  
 (modified after loading)  
 Analysis Method : C:\CHEM32\1\METHODS\DEF\_LC.M  
 Last changed : 3/30/2022 8:00:24 AM  
 (modified after loading)  
 Sample Info : IC, Hexane/i-PrOH = 97/3, 1.0 mL/min, 30 oC, 254 nm

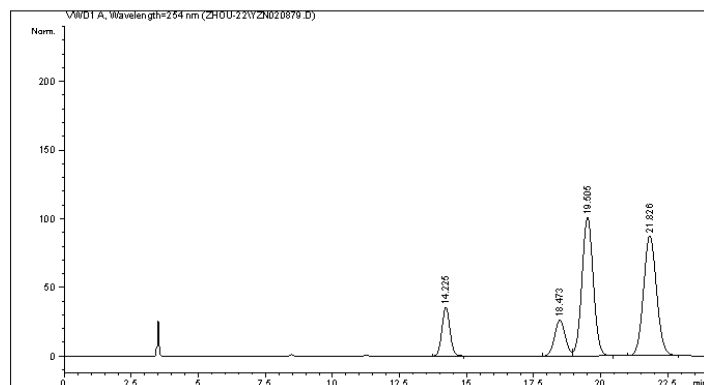

=====  
 Area Percent Report  
 =====

Sorted By : Signal  
 Multiplier: : 1.0000  
 Dilution: : 1.0000  
 Use Multiplier & Dilution Factor with ISTDs

Signal 1: VWD1 A, Wavelength=254 nm

| Peak # | RetTime [min] | Type | Width [min] | Area [mAU*s] | Height [mAU] | Area %  |
|--------|---------------|------|-------------|--------------|--------------|---------|
| 1      | 14.225        | BB   | 0.3216      | 733.11090    | 35.40981     | 9.9532  |
| 2      | 18.473        | BV   | 0.4315      | 724.22681    | 26.09992     | 9.8325  |
| 3      | 19.505        | VB   | 0.4584      | 2968.50244   | 100.86356    | 40.3022 |
| 4      | 21.826        | BB   | 0.5232      | 2939.77002   | 87.14444     | 39.9121 |

Totals : 7365.61017 249.51773

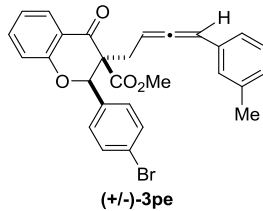

(+/-)-3pe

=====  
 \*\*\* End of Report \*\*\*

Data File C:\CHEM32\1\DATA\ZHOU-22\YZN020878.D  
 Sample Name: LL-9-39C

=====  
 Acq. Operator :  
 Acq. Instrument : Instrument 1 Location : -  
 Injection Date : 3/30/2022 7:02:04 AM  
 Acq. Method : C:\CHEM32\1\METHODS\DEF\_LC.M  
 Last changed : 3/30/2022 5:52:07 AM  
 (modified after loading)  
 Analysis Method : C:\CHEM32\1\METHODS\DEF\_LC.M  
 Last changed : 3/30/2022 8:01:01 AM  
 (modified after loading)  
 Sample Info : IC, Hexane/i-PrOH = 97/3, 1.0 mL/min, 30 oC, 254 nm

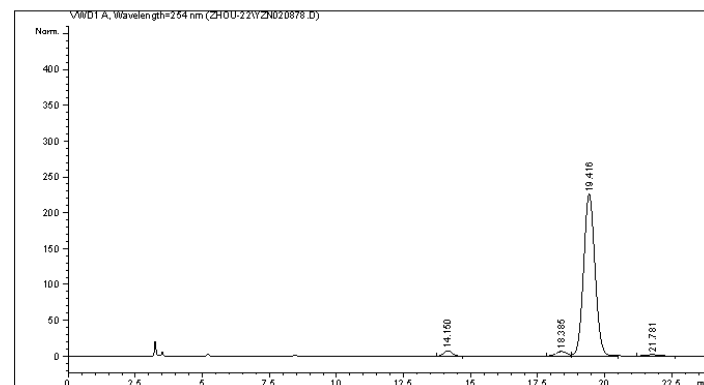

=====  
 Area Percent Report  
 =====

Sorted By : Signal  
 Multiplier: : 1.0000  
 Dilution: : 1.0000  
 Use Multiplier & Dilution Factor with ISTDs

Signal 1: VWD1 A, Wavelength=254 nm

| Peak # | RetTime [min] | Type | Width [min] | Area [mAU*s] | Height [mAU] | Area %  |
|--------|---------------|------|-------------|--------------|--------------|---------|
| 1      | 14.150        | BB   | 0.3268      | 153.28743    | 7.29247      | 2.1775  |
| 2      | 18.385        | BV   | 0.4152      | 171.09190    | 6.28301      | 2.4304  |
| 3      | 19.416        | VB   | 0.4610      | 6658.12012   | 225.47424    | 94.5816 |
| 4      | 21.781        | BB   | 0.4914      | 57.04807     | 1.78218      | 0.8104  |

Totals : 7039.54752 240.83190

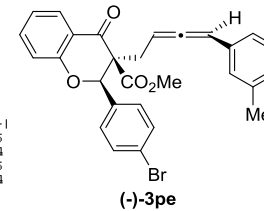

(-)-3pe

=====  
 \*\*\* End of Report \*\*\*

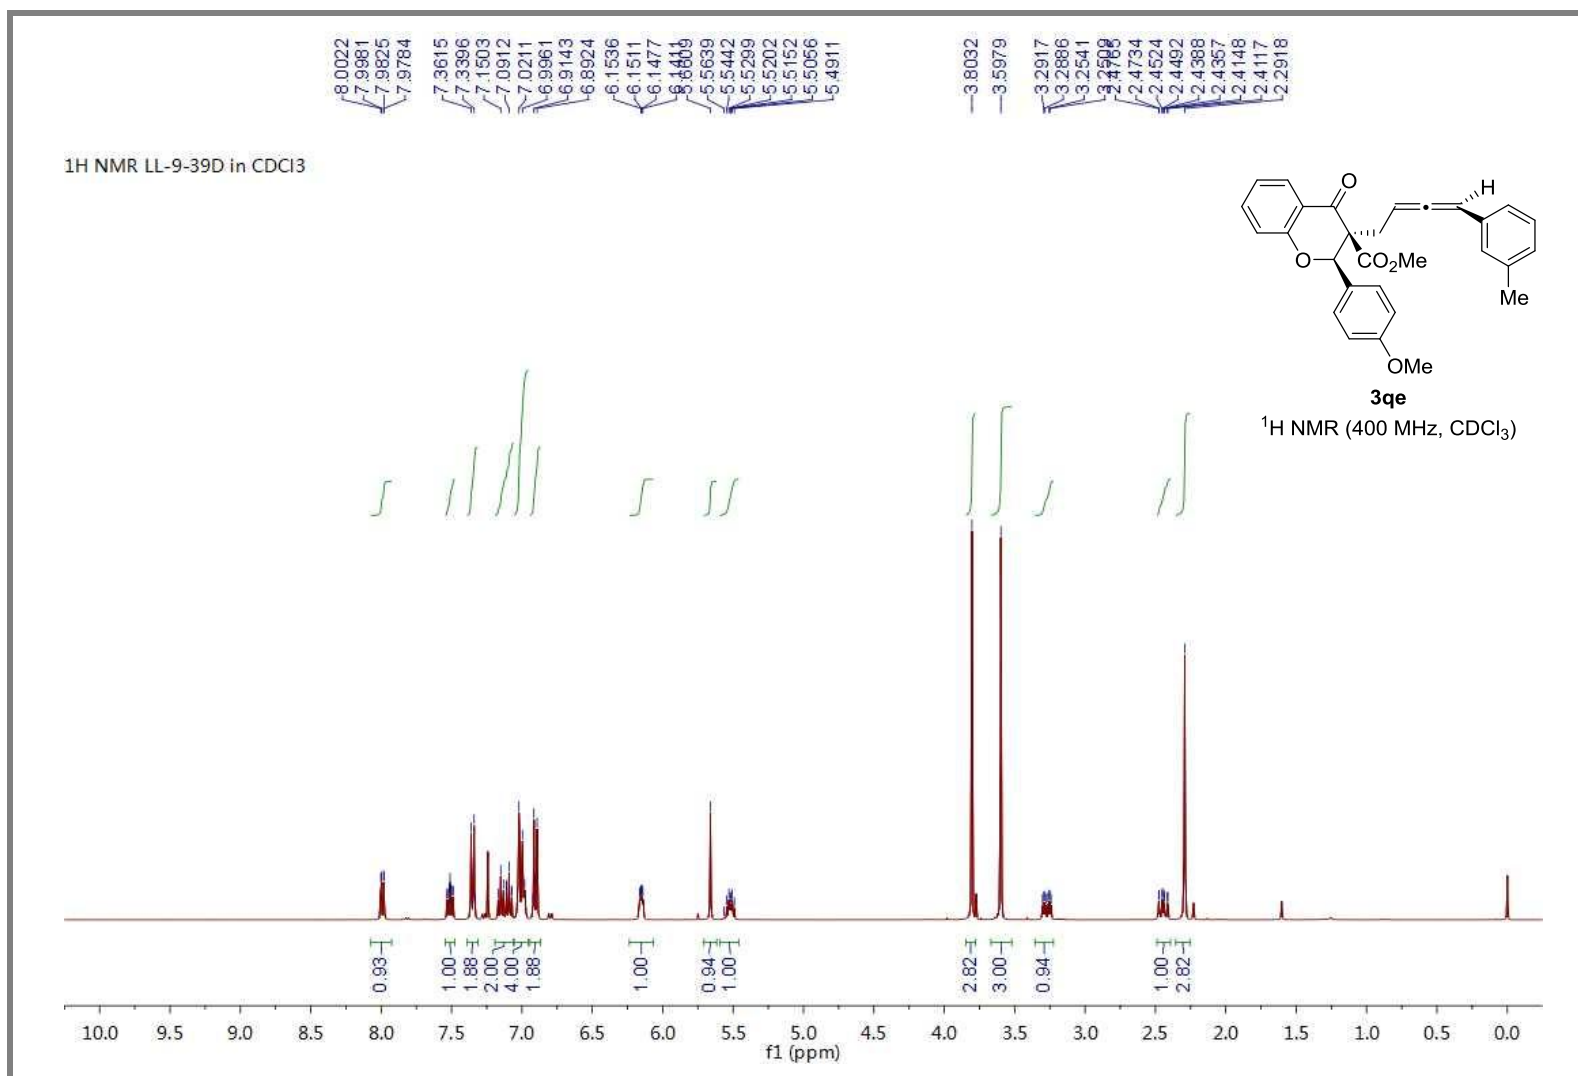



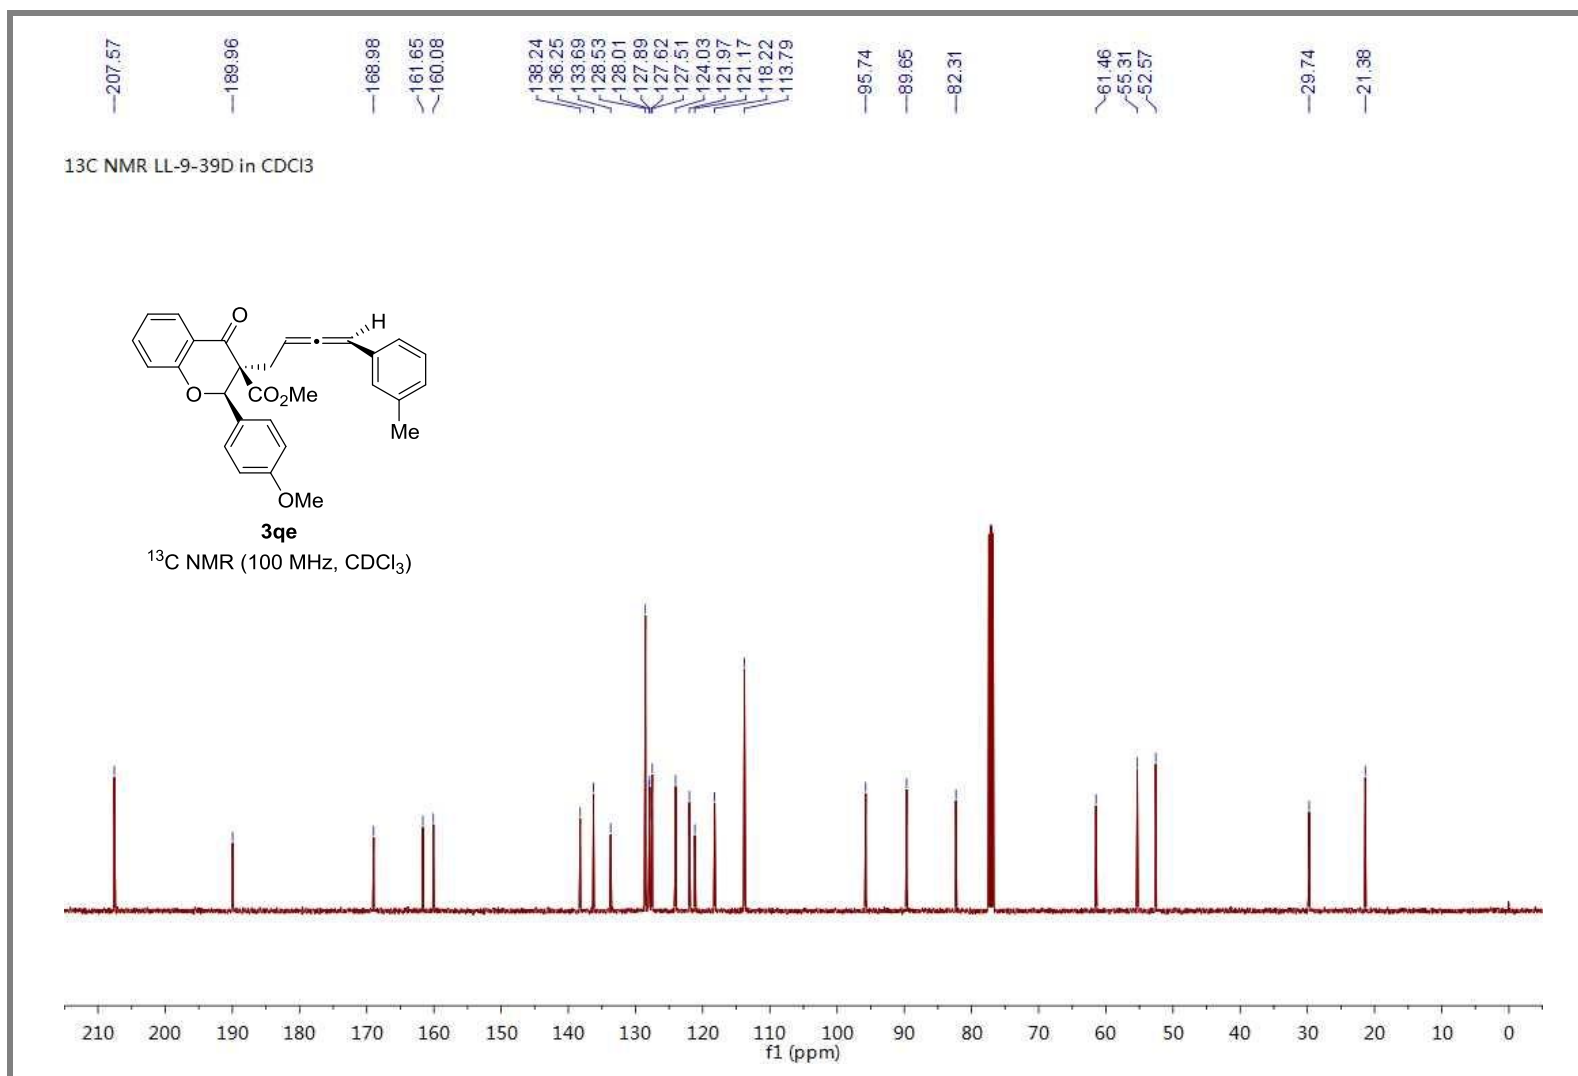

Data File C:\CHEM32\1\DATA\ZHOU-22\YZN020854.D  
 Sample Name: LL-9-39D +/-

=====  
 Acq. Operator :  
 Acq. Instrument : Instrument 1 Location : -  
 Injection Date : 3/29/2022 2:06:43 AM  
 Acq. Method : C:\CHEM32\1\METHODS\DEF\_LC.M  
 Last changed : 3/29/2022 2:03:51 AM  
 (modified after loading)  
 Analysis Method : C:\CHEM32\1\METHODS\DEF\_LC.M  
 Last changed : 3/30/2022 8:59:36 AM  
 (modified after loading)  
 Sample Info : AD-H, Hexane/i-PrOH = 90/10, 1.0 mL/min, 30 oC, 254 nm

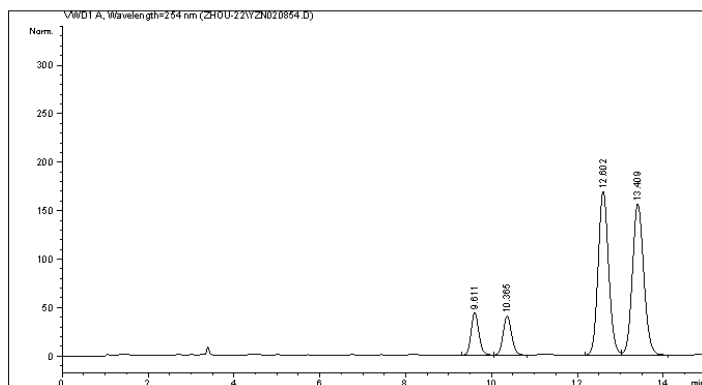

=====  
 Area Percent Report  
 =====

Sorted By : Signal  
 Multiplier: : 1.0000  
 Dilution: : 1.0000  
 Use Multiplier & Dilution Factor with ISTDs

Signal 1: VWD1 A, Wavelength=254 nm

| Peak # | RetTime [min] | Type | Width [min] | Area [mAU] | Height [mAU] | Area %  |
|--------|---------------|------|-------------|------------|--------------|---------|
| 1      | 9.611         | BV   | 0.1941      | 547.21344  | 43.71530     | 8.0220  |
| 2      | 10.365        | VB   | 0.2105      | 547.29370  | 40.40053     | 8.0232  |
| 3      | 12.602        | BV   | 0.2633      | 2859.57886 | 168.69302    | 41.9208 |
| 4      | 13.409        | VB   | 0.2843      | 2867.30200 | 156.01204    | 42.0340 |

Totals : 6821.38800 408.82089

=====  
 \*\*\* End of Report \*\*\*

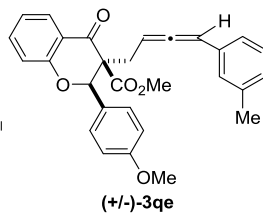

Instrument 1 3/30/2022 9:01:02 AM

Page 1 of 1

Data File C:\CHEM32\1\DATA\ZHOU-22\YZN020882.D  
 Sample Name: LL-9-39D

=====  
 Acq. Operator :  
 Acq. Instrument : Instrument 1 Location : -  
 Injection Date : 3/30/2022 9:02:40 AM  
 Acq. Method : C:\CHEM32\1\METHODS\DEF\_LC.M  
 Last changed : 3/30/2022 9:01:22 AM  
 (modified after loading)  
 Analysis Method : C:\CHEM32\1\METHODS\DEF\_LC.M  
 Last changed : 3/30/2022 9:23:04 AM  
 (modified after loading)  
 Sample Info : AD-H, Hexane/i-PrOH = 90/10, 1.0 mL/min, 30 oC, 254 nm

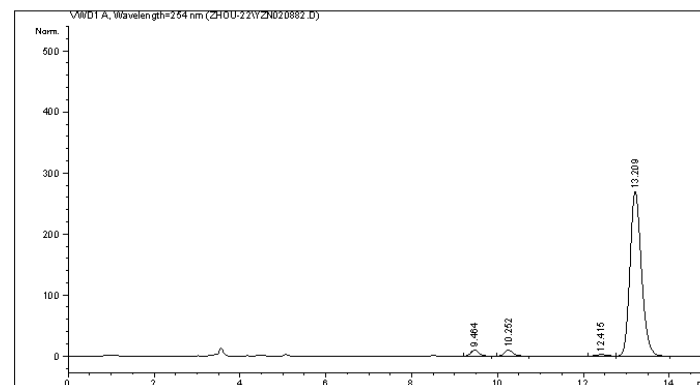

=====  
 Area Percent Report  
 =====

Sorted By : Signal  
 Multiplier: : 1.0000  
 Dilution: : 1.0000  
 Use Multiplier & Dilution Factor with ISTDs

Signal 1: VWD1 A, Wavelength=254 nm

| Peak # | RetTime [min] | Type | Width [min] | Area [mAU] | Height [mAU] | Area %  |
|--------|---------------|------|-------------|------------|--------------|---------|
| 1      | 9.464         | BB   | 0.1953      | 125.08141  | 9.81078      | 2.3634  |
| 2      | 10.252        | BB   | 0.2123      | 139.69920  | 10.09933     | 2.6397  |
| 3      | 12.415        | BV   | 0.2567      | 39.72606   | 2.40534      | 0.7506  |
| 4      | 13.209        | VB   | 0.2843      | 4987.81689 | 269.61588    | 94.2463 |

Totals : 5292.32357 291.93133

=====  
 \*\*\* End of Report \*\*\*

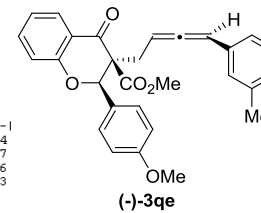

Instrument 1 3/30/2022 9:23:11 AM

Page 1 of 1

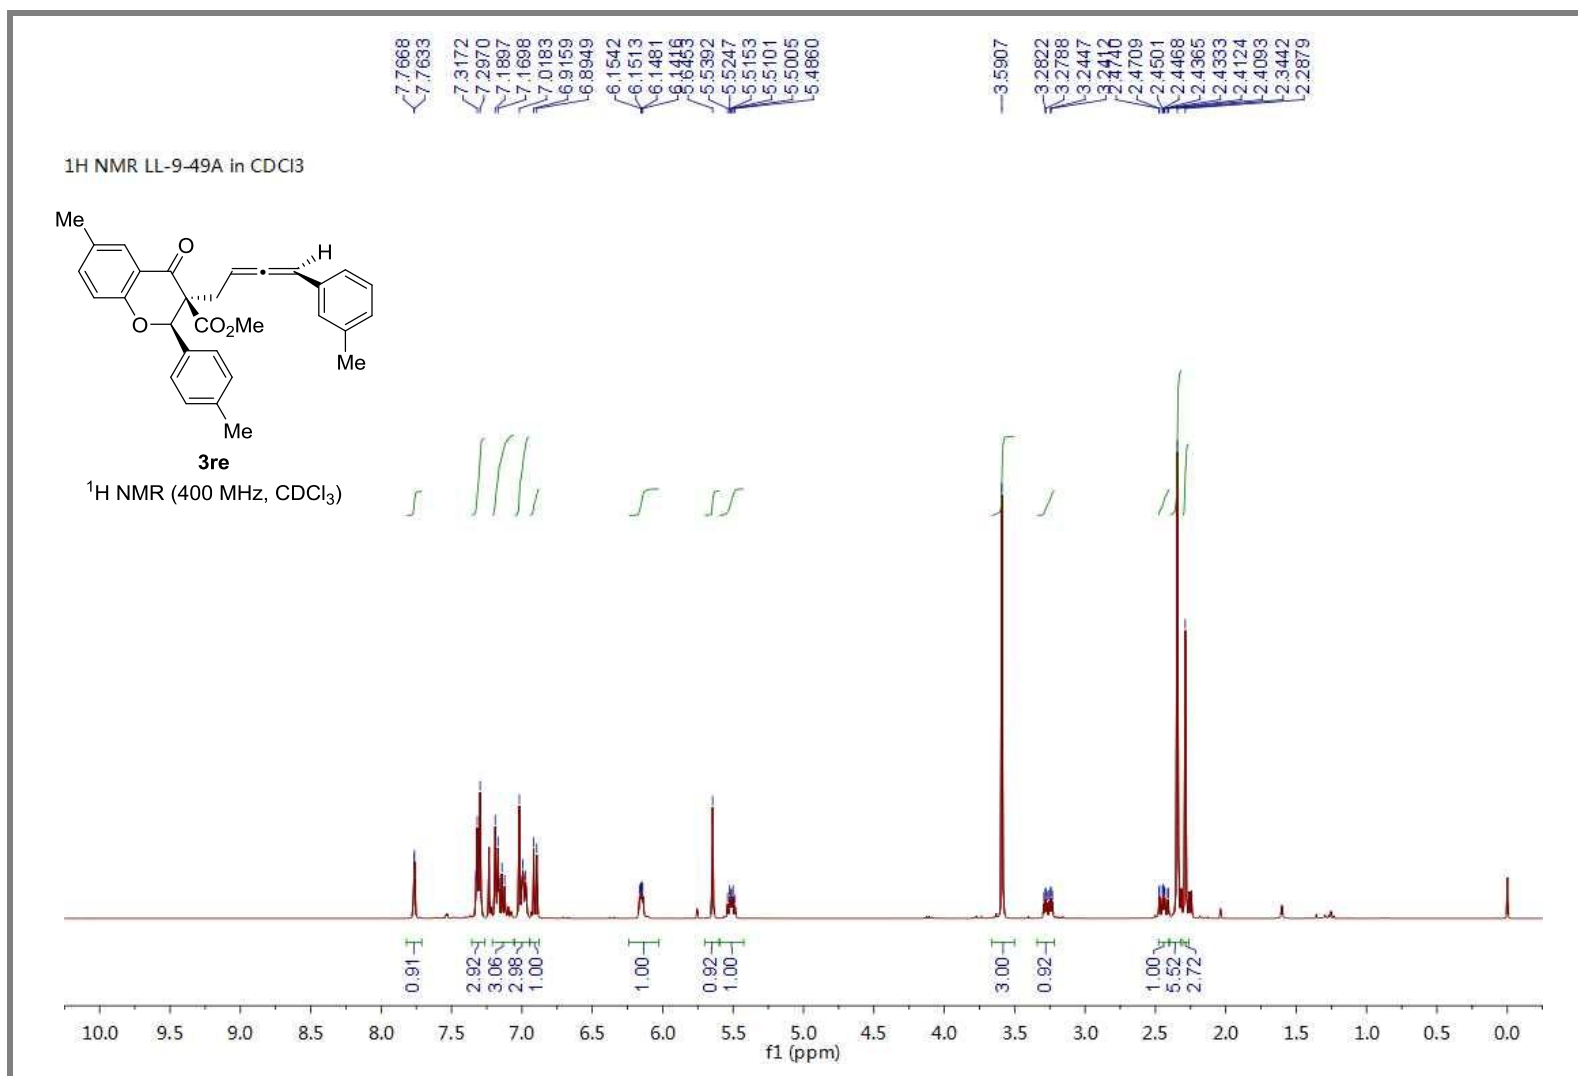

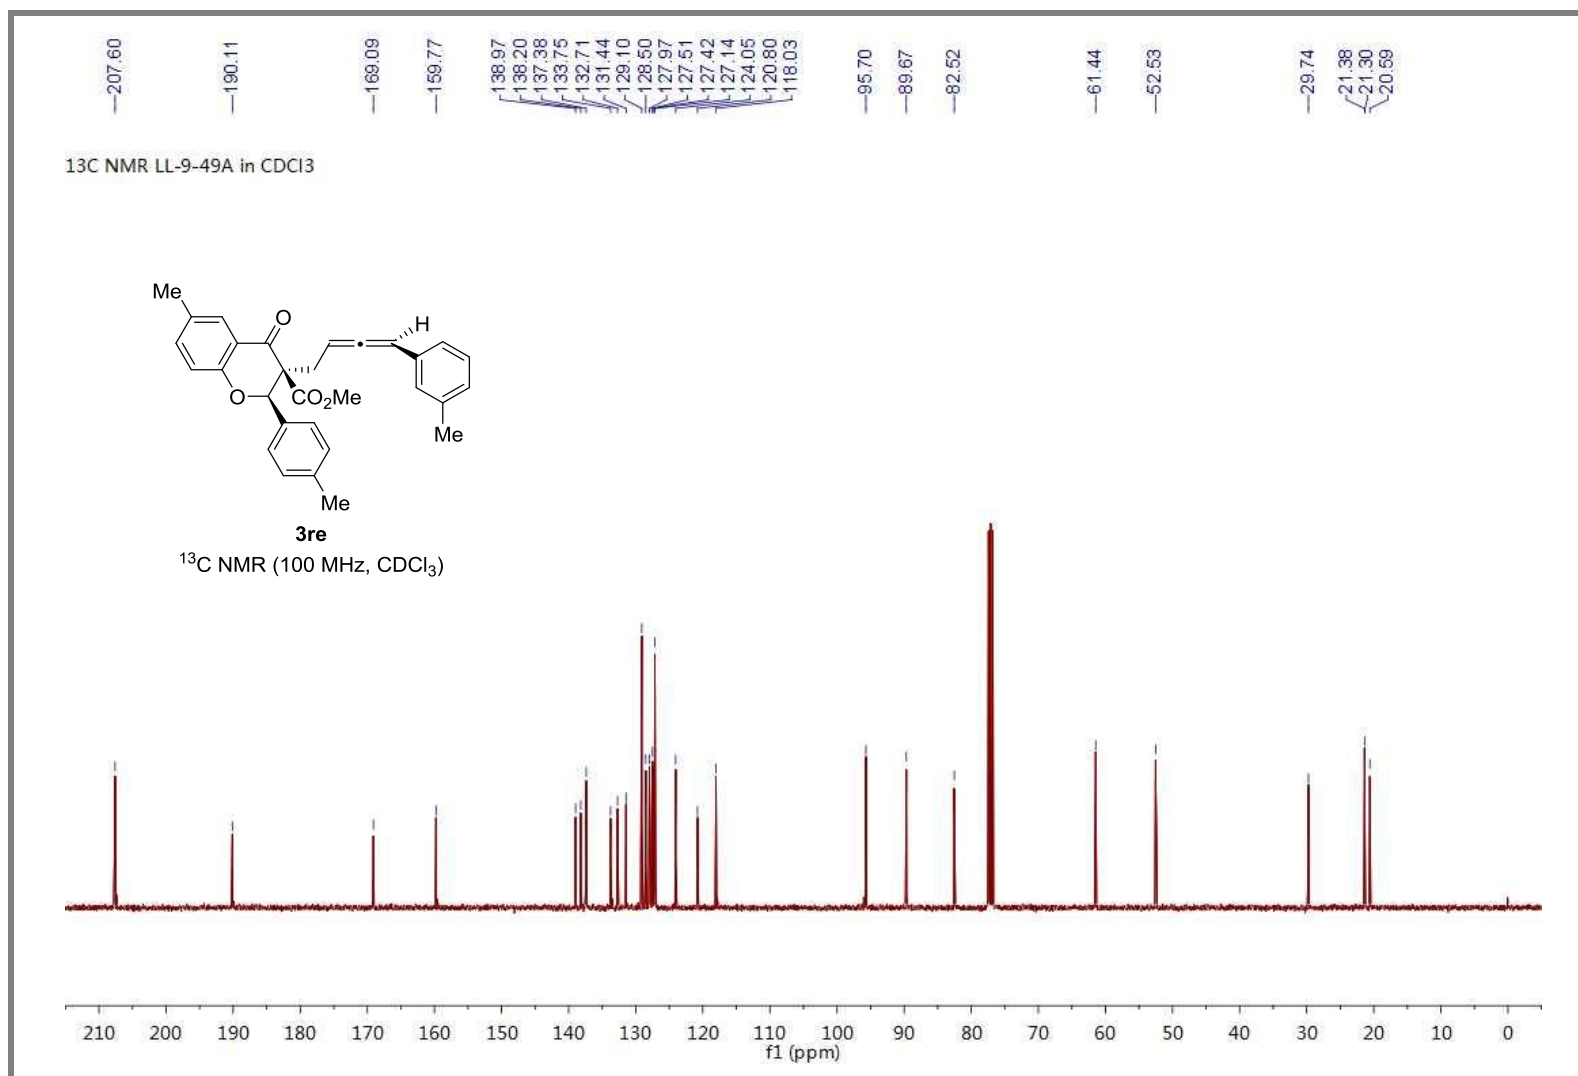

Data File C:\CHEM32\1\DATA\ZHOU-22\YZN020948.D  
 Sample Name: LL-9-49A (+/-)

=====  
 Acq. Operator :  
 Acq. Instrument : Instrument 1 Location : -  
 Injection Date : 4/12/2022 10:19:06 PM  
 Acq. Method : C:\CHEM32\1\METHODS\DEF\_LC.M  
 Last changed : 4/12/2022 10:16:55 PM  
 (modified after loading)  
 Analysis Method : C:\CHEM32\1\METHODS\DEF\_LC.M  
 Last changed : 4/12/2022 10:52:51 PM  
 (modified after loading)  
 Sample Info : IC, Hexane/i-PrOH = 97/3, 1.0 mL/min, 30 oC, 254 nm

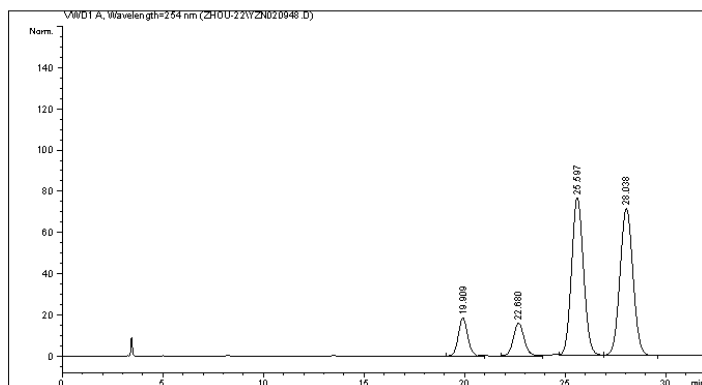

=====  
 Area Percent Report  
 =====

Sorted By : Signal  
 Multiplier: : 1.0000  
 Dilution: : 1.0000  
 Use Multiplier & Dilution Factor with ISTDs

Signal 1: VWD1 A, Wavelength=254 nm

| Peak # | RetTime [min] | Type | Width [min] | Area [mAU*s] | Height [mAU] | Area %  |
|--------|---------------|------|-------------|--------------|--------------|---------|
| 1      | 19.909        | BB   | 0.4943      | 591.56036    | 18.47964     | 7.7849  |
| 2      | 22.680        | BB   | 0.5743      | 587.91638    | 15.89114     | 7.7369  |
| 3      | 25.597        | VV   | 0.6478      | 3202.21997   | 76.83402     | 42.1409 |
| 4      | 28.038        | VB   | 0.7013      | 3217.14160   | 71.47879     | 42.3373 |

Totals : 7598.83832 182.68359

=====  
 \*\*\* End of Report \*\*\*

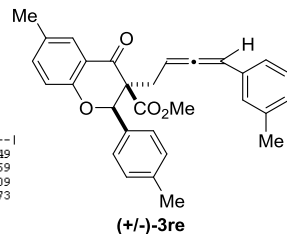

Data File C:\CHEM32\1\DATA\ZHOU-22\YZN020947.D  
 Sample Name: LL-9-49A

=====  
 Acq. Operator :  
 Acq. Instrument : Instrument 1 Location : -  
 Injection Date : 4/12/2022 9:42:24 PM  
 Acq. Method : C:\CHEM32\1\METHODS\DEF\_LC.M  
 Last changed : 4/12/2022 9:28:32 PM  
 (modified after loading)  
 Analysis Method : C:\CHEM32\1\METHODS\DEF\_LC.M  
 Last changed : 4/12/2022 10:50:29 PM  
 (modified after loading)  
 Sample Info : IC, Hexane/i-PrOH = 97/3, 1.0 mL/min, 30 oC, 254 nm

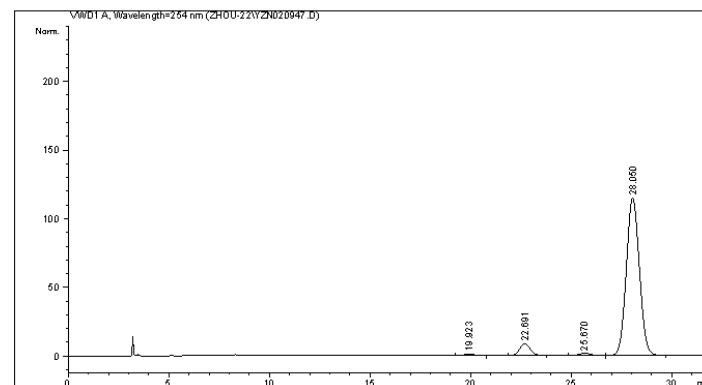

=====  
 Area Percent Report  
 =====

Sorted By : Signal  
 Multiplier: : 1.0000  
 Dilution: : 1.0000  
 Use Multiplier & Dilution Factor with ISTDs

Signal 1: VWD1 A, Wavelength=254 nm

| Peak # | RetTime [min] | Type | Width [min] | Area [mAU*s] | Height [mAU] | Area %  |
|--------|---------------|------|-------------|--------------|--------------|---------|
| 1      | 19.923        | BB   | 0.4965      | 43.03652     | 1.31603      | 0.7679  |
| 2      | 22.681        | BB   | 0.5731      | 317.96243    | 8.58951      | 5.6734  |
| 3      | 25.670        | VB   | 0.6103      | 66.22372     | 1.59264      | 1.1816  |
| 4      | 28.050        | VB   | 0.7022      | 5177.21680   | 114.83069    | 92.3771 |

Totals : 5604.43947 126.32886

=====  
 \*\*\* End of Report \*\*\*

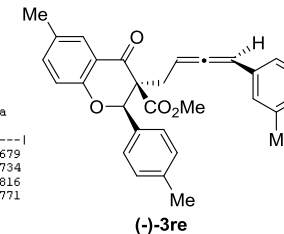

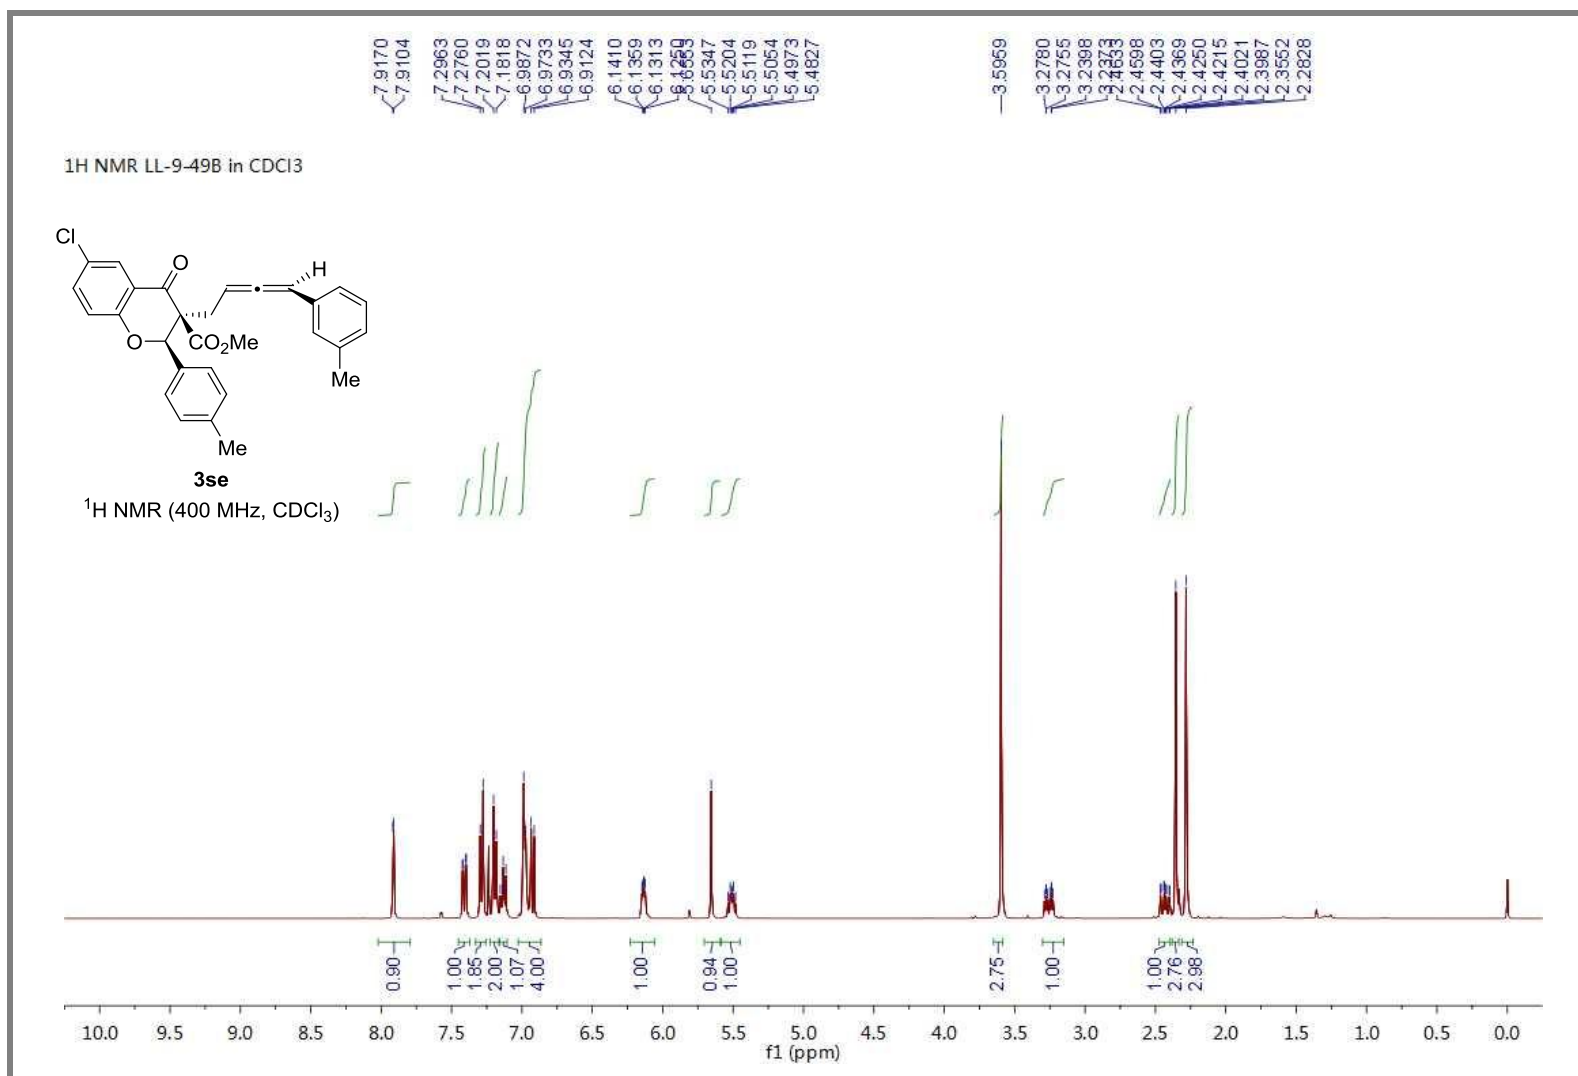

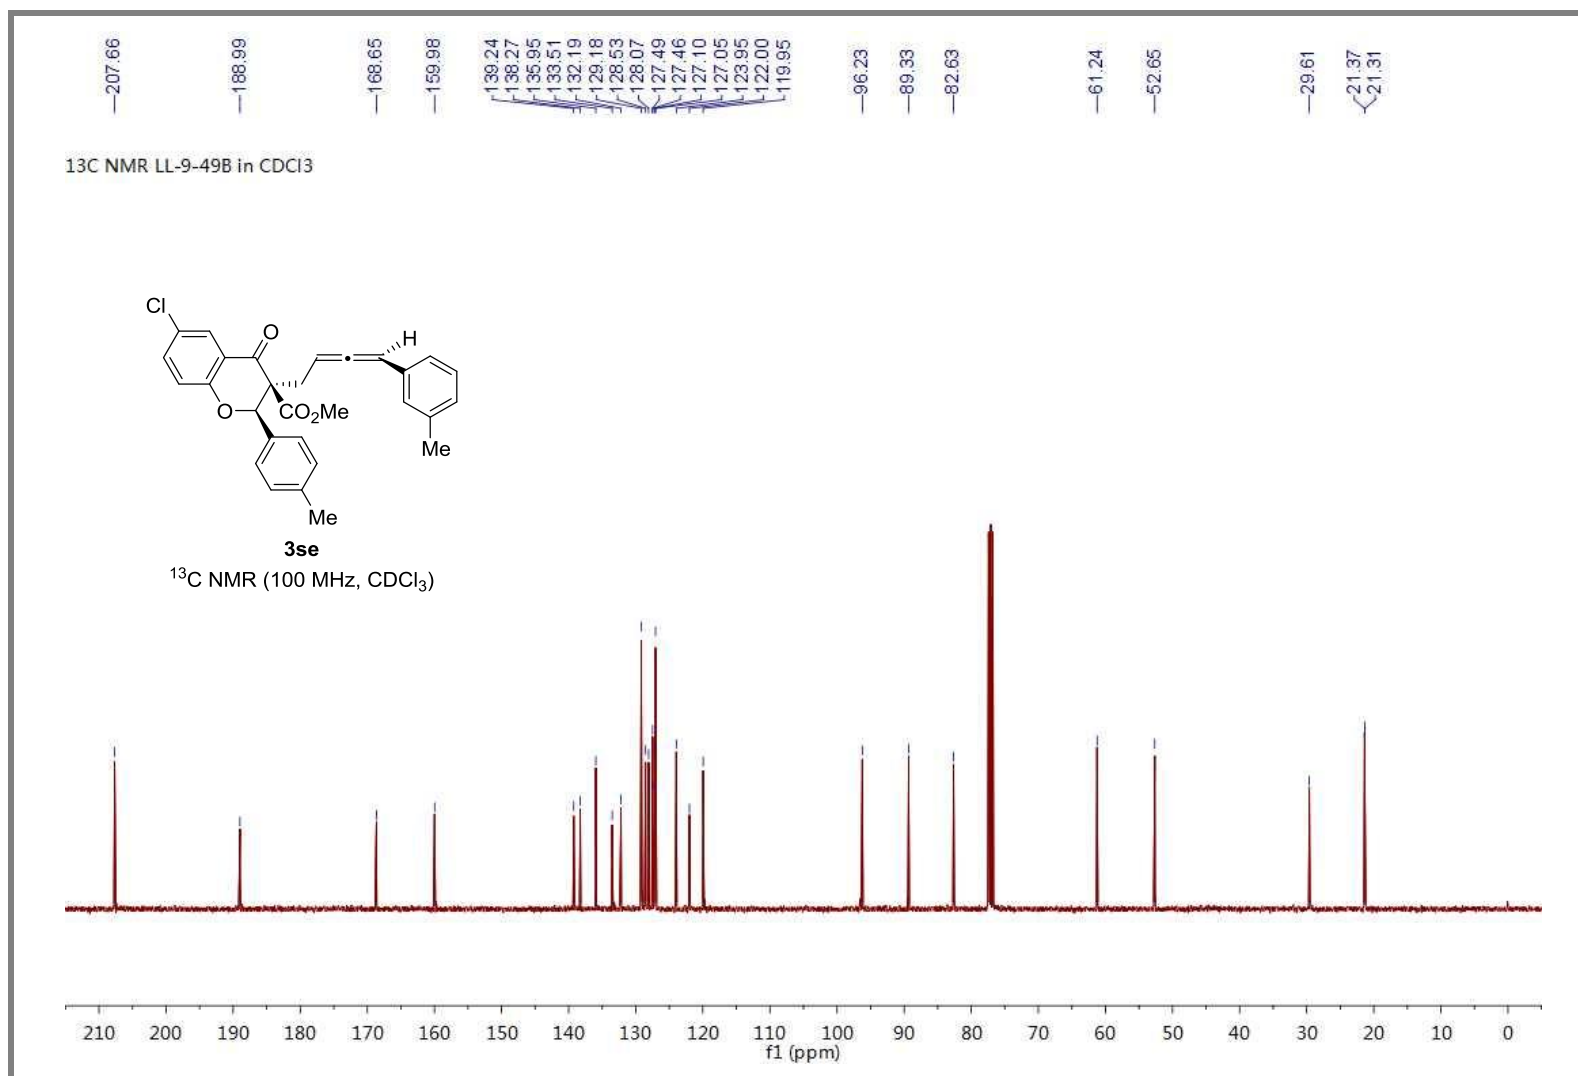

Data File C:\CHEM32\1\DATA\ZHOU-22\YZN020965.D  
 Sample Name: LL-9-49B +/-

=====  
 Acq. Operator :  
 Acq. Instrument : Instrument 1 Location : -  
 Injection Date : 4/13/2022 8:30:06 AM  
 Acq. Method : C:\CHEM32\1\METHODS\DEF\_LC.M  
 Last changed : 4/13/2022 8:28:06 AM  
 (modified after loading)  
 Analysis Method : C:\CHEM32\1\METHODS\DEF\_LC.M  
 Last changed : 4/13/2022 9:04:03 AM  
 (modified after loading)  
 Sample Info : IC, Hexane/i-PrOH = 98/2,1.0 mL/min, 30 oC, 254 nm

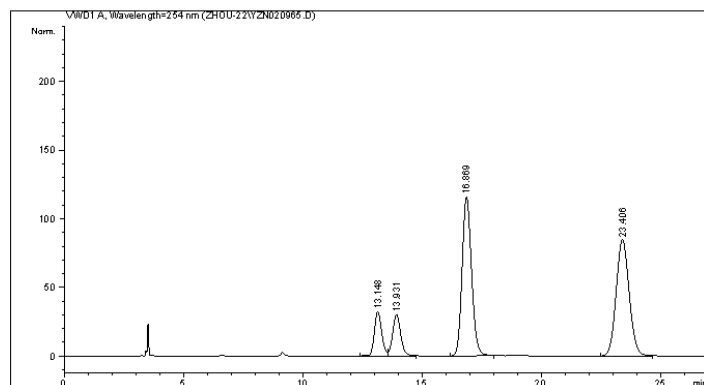

=====  
 Area Percent Report  
 =====

Sorted By : Signal  
 Multiplier: : 1.0000  
 Dilution: : 1.0000  
 Use Multiplier & Dilution Factor with ISTDs

Signal 1: WVD1 A, Wavelength=254 nm

| Peak # | RetTime [min] | Type | Width [min] | Area [mAU*s] | Height [mAU] | Area %  |
|--------|---------------|------|-------------|--------------|--------------|---------|
| 1      | 13.148        | BV   | 0.3286      | 687.04541    | 32.25151     | 8.8260  |
| 2      | 13.931        | VB   | 0.3596      | 704.27374    | 30.18419     | 9.0474  |
| 3      | 16.869        | BB   | 0.4272      | 3185.66895   | 115.82655    | 40.9243 |
| 4      | 23.406        | BB   | 0.5896      | 3207.30396   | 84.54397     | 41.2023 |

Totals : 7784.29205 262.80622

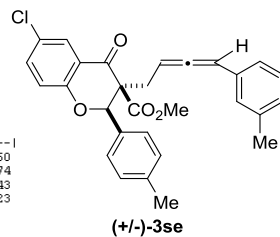

=====  
 \*\*\* End of Report \*\*\*

Data File C:\CHEM32\1\DATA\ZHOU-22\YZN020964.D  
 Sample Name: LL-9-49B

=====  
 Acq. Operator :  
 Acq. Instrument : Instrument 1 Location : -  
 Injection Date : 4/13/2022 8:00:27 AM  
 Acq. Method : C:\CHEM32\1\METHODS\DEF\_LC.M  
 Last changed : 4/13/2022 7:21:48 AM  
 (modified after loading)  
 Analysis Method : C:\CHEM32\1\METHODS\DEF\_LC.M  
 Last changed : 4/13/2022 9:06:04 AM  
 (modified after loading)  
 Sample Info : IC, Hexane/i-PrOH = 98/2,1.0 mL/min, 30 oC, 254 nm

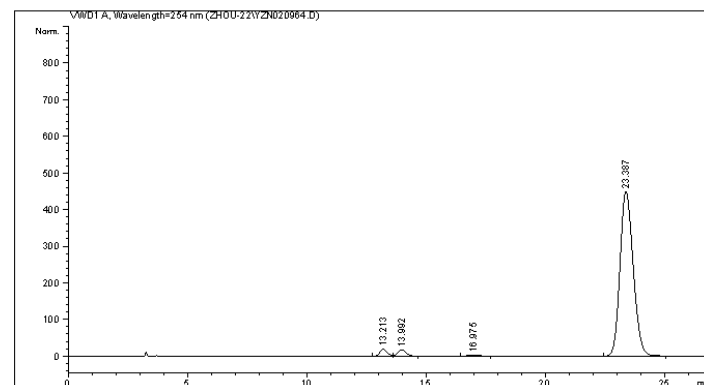

=====  
 Area Percent Report  
 =====

Sorted By : Signal  
 Multiplier: : 1.0000  
 Dilution: : 1.0000  
 Use Multiplier & Dilution Factor with ISTDs

Signal 1: WVD1 A, Wavelength=254 nm

| Peak # | RetTime [min] | Type | Width [min] | Area [mAU*s] | Height [mAU] | Area %  |
|--------|---------------|------|-------------|--------------|--------------|---------|
| 1      | 13.213        | BV   | 0.3268      | 403.63647    | 18.97101     | 2.2246  |
| 2      | 13.992        | VB   | 0.3558      | 388.24243    | 16.78070     | 2.1398  |
| 3      | 16.975        | BB   | 0.4170      | 96.74460     | 3.50108      | 0.5332  |
| 4      | 23.387        | BB   | 0.5985      | 1.72556e4    | 448.82495    | 95.1024 |

Totals : 1.81442e4 488.07774

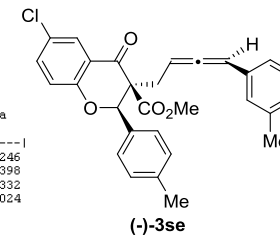

=====  
 \*\*\* End of Report \*\*\*



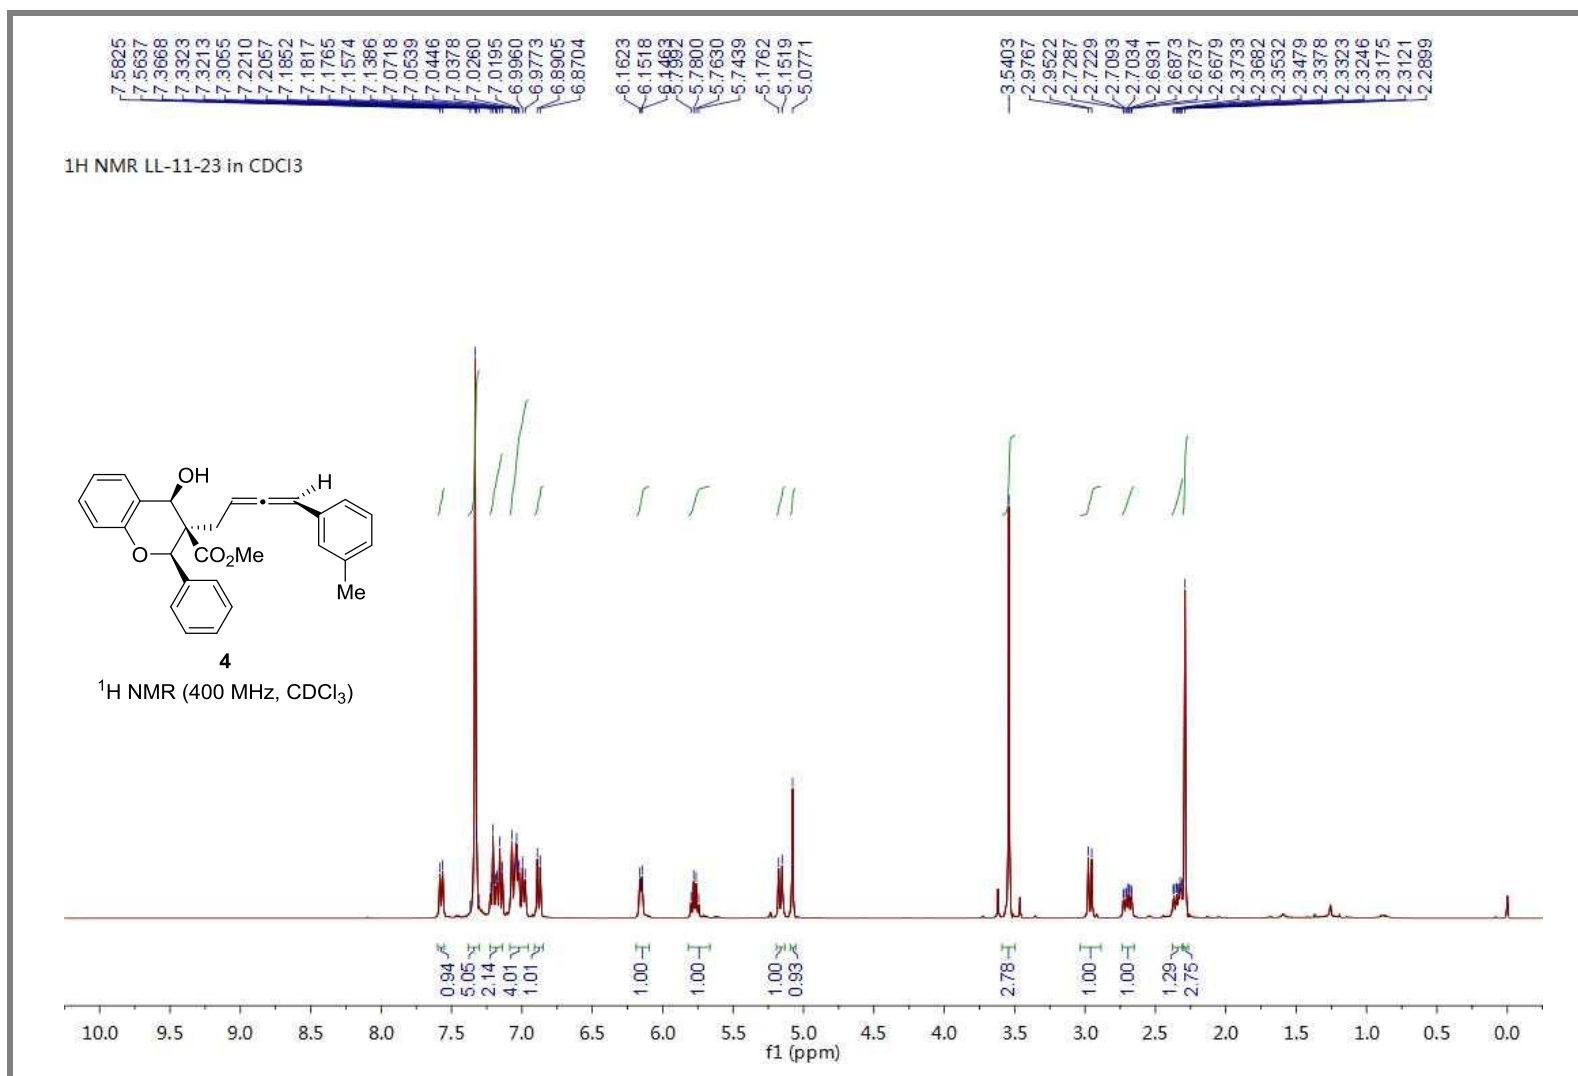

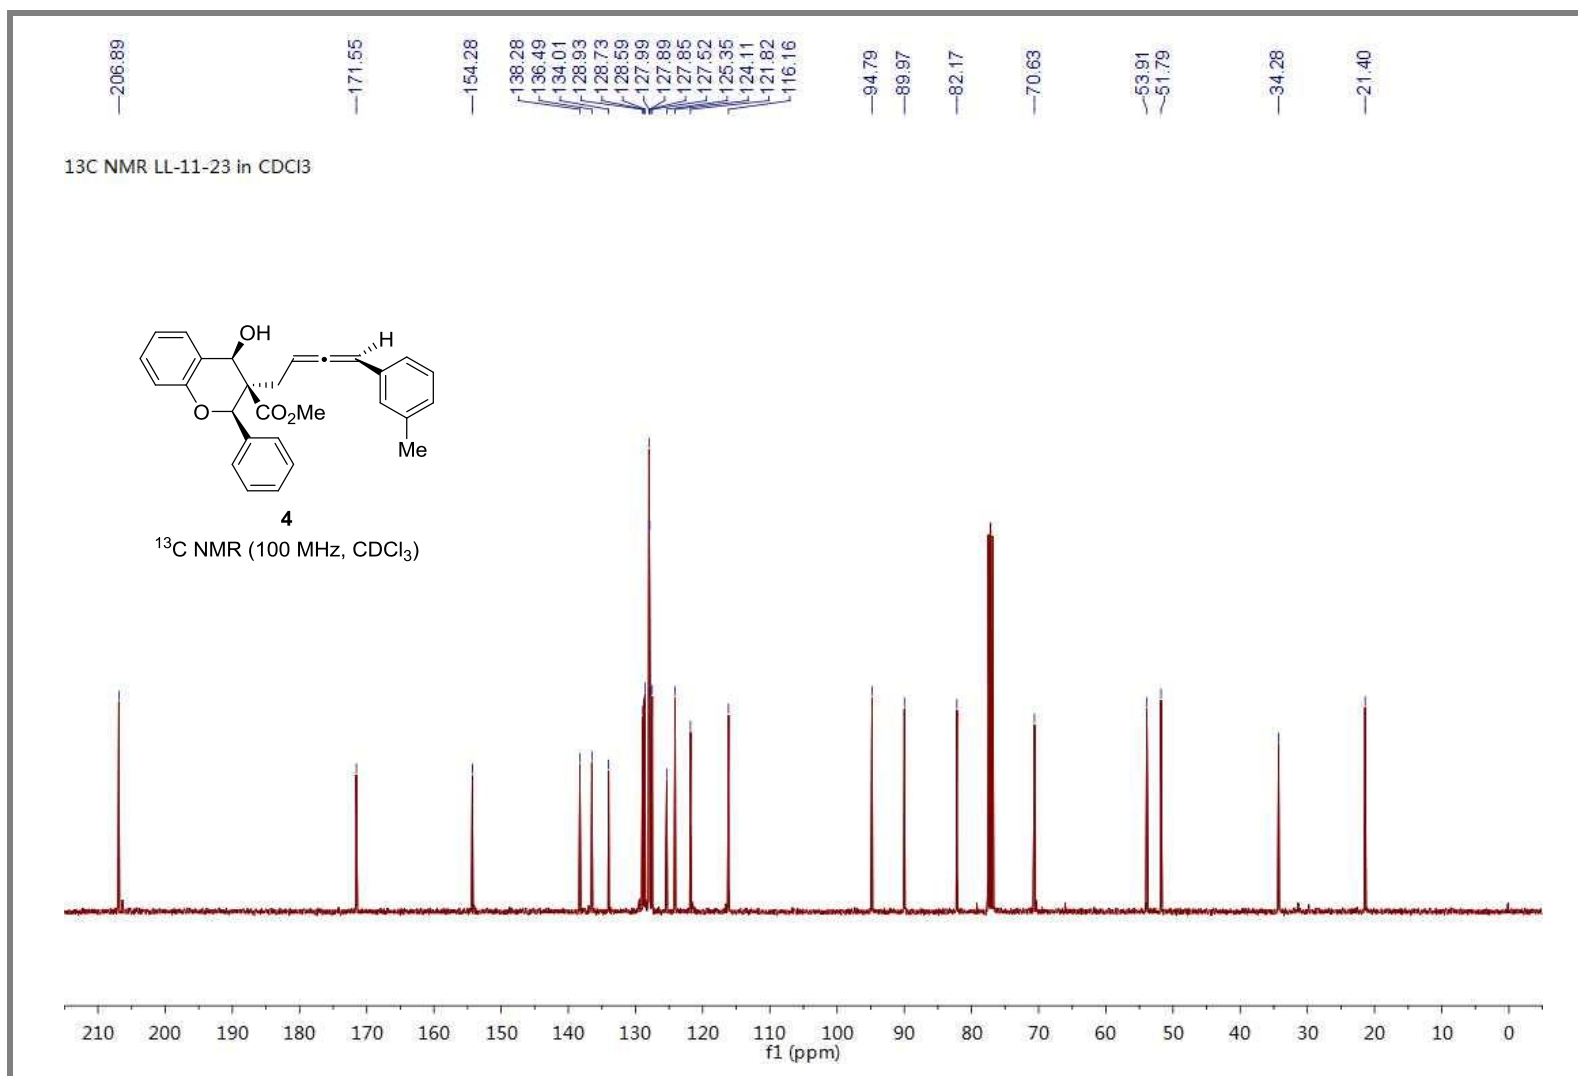

Data File C:\CHEM32\1\DATA\ZHOU-22\YZN021968.D  
 Sample Name: LL-11-23 +/-

=====  
 Acq. Operator :  
 Acq. Instrument : Instrument 1 Location : -  
 Injection Date : 11/4/2022 10:29:51 PM  
 Acq. Method : C:\CHEM32\1\METHODS\DEF\_LC.M  
 Last changed : 11/4/2022 10:13:16 PM  
 (modified after loading)  
 Analysis Method : C:\CHEM32\1\METHODS\DEF\_LC.M  
 Last changed : 11/5/2022 7:36:04 AM  
 (modified after loading)  
 Sample Info : ID, Hexane/i-PrOH = 90/10, 1.0 mL/min, 30 oC, 254 nm

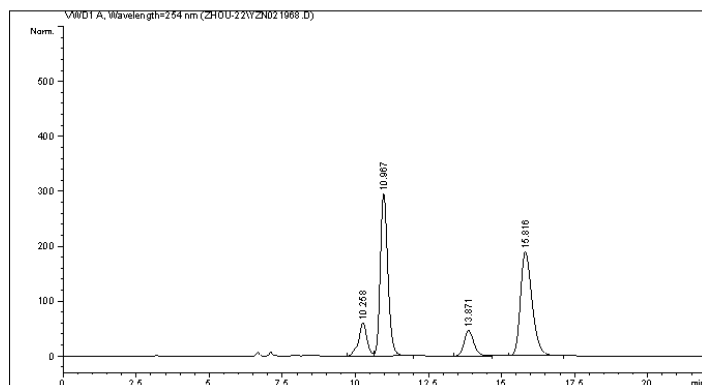

=====  
 Area Percent Report  
 =====

Sorted By : Signal  
 Multiplier: : 1.0000  
 Dilution: : 1.0000  
 Use Multiplier & Dilution Factor with ISTDs

Signal 1: VWD1 A, Wavelength=254 nm

| Peak # | RetTime [min] | Type | Width [min] | Area [mAU] | Height [%] | Area [%] |
|--------|---------------|------|-------------|------------|------------|----------|
| 1      | 10.258        | EV   | 0.2947      | 1194.14185 | 60.40765   | 9.3277   |
| 2      | 10.967        | VB   | 0.2770      | 5304.89404 | 294.68143  | 41.4377  |
| 3      | 13.871        | BB   | 0.3519      | 1052.33911 | 46.16315   | 8.2201   |
| 4      | 15.816        | BB   | 0.4273      | 5250.72168 | 189.13594  | 41.0145  |

Totals : 1.28021e4 590.38817

=====  
 \*\*\* End of Report \*\*\*

Instrument 1 11/5/2022 7:36:14 AM

Page 1 of 1

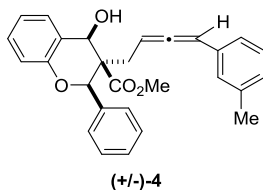

Data File C:\CHEM32\1\DATA\ZHOU-22\YZN021969.D  
 Sample Name: LL-11-23

=====  
 Acq. Operator :  
 Acq. Instrument : Instrument 1 Location : -  
 Injection Date : 11/4/2022 10:54:23 PM  
 Acq. Method : C:\CHEM32\1\METHODS\DEF\_LC.M  
 Last changed : 11/4/2022 10:52:49 PM  
 (modified after loading)  
 Analysis Method : C:\CHEM32\1\METHODS\DEF\_LC.M  
 Last changed : 11/5/2022 7:36:04 AM  
 (modified after loading)  
 Sample Info : ID, Hexane/i-PrOH = 90/10, 1.0 mL/min, 30 oC, 254 nm

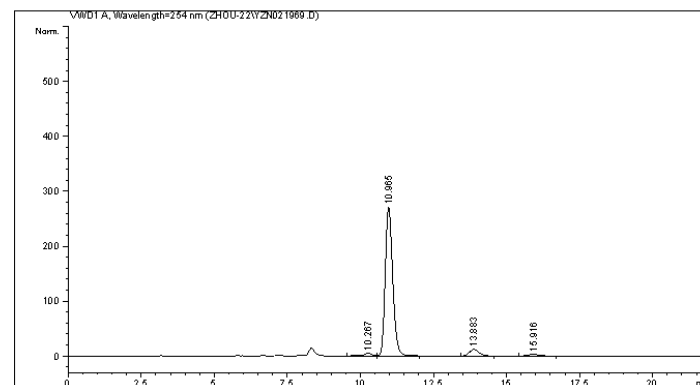

=====  
 Area Percent Report  
 =====

Sorted By : Signal  
 Multiplier: : 1.0000  
 Dilution: : 1.0000  
 Use Multiplier & Dilution Factor with ISTDs

Signal 1: VWD1 A, Wavelength=254 nm

| Peak # | RetTime [min] | Type | Width [min] | Area [mAU] | Height [%] | Area [%] |
|--------|---------------|------|-------------|------------|------------|----------|
| 1      | 10.267        | EV   | 0.3174      | 105.68909  | 4.78379    | 2.0084   |
| 2      | 10.965        | VB   | 0.2740      | 4805.31104 | 270.75851  | 91.3166  |
| 3      | 13.883        | BB   | 0.3511      | 270.88757  | 11.91542   | 5.1477   |
| 4      | 15.916        | BB   | 0.4418      | 80.36528   | 2.88241    | 1.5272   |

Totals : 5262.25298 290.34014

=====  
 \*\*\* End of Report \*\*\*

Instrument 1 11/5/2022 7:39:56 AM

Page 1 of 1

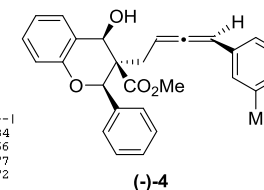

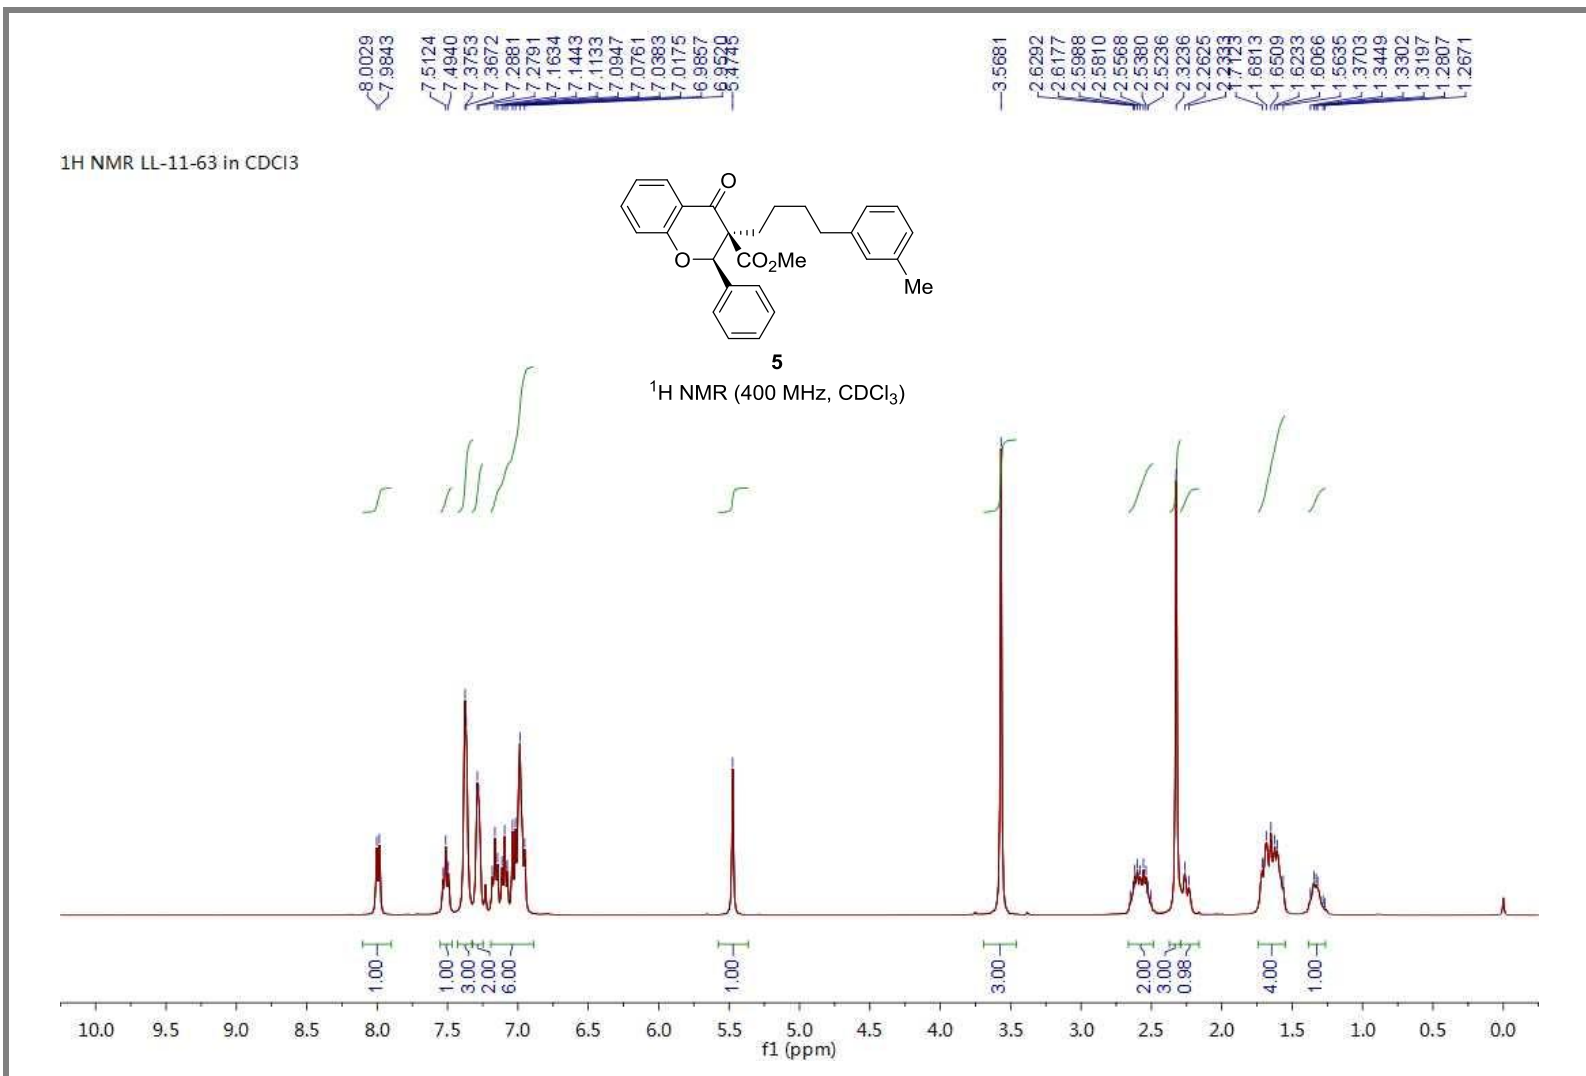

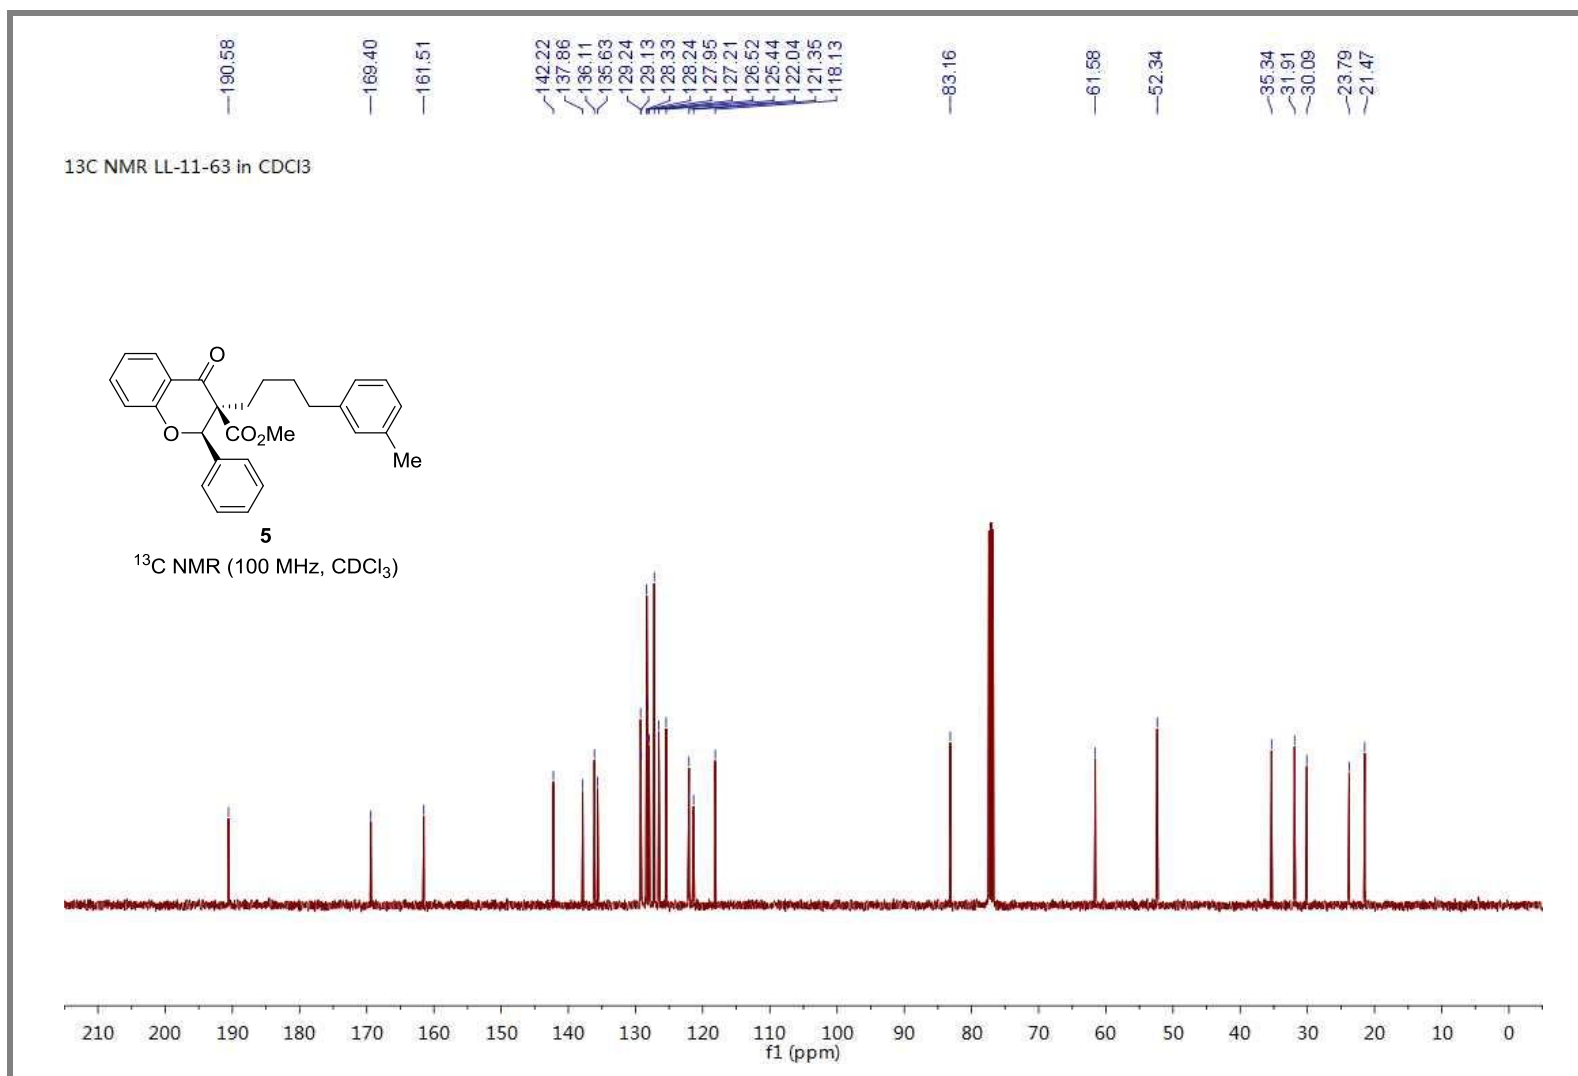

Data File C:\CHEM32\1\DATA\ZHOU-22\YZN022308.D  
 Sample Name: LL-11-63 +/-

=====  
 Acq. Operator :  
 Acq. Instrument : Instrument 1 Location : -  
 Injection Date : 12/31/2022 3:39:18 AM  
 Acq. Method : C:\CHEM32\1\METHODS\DEF\_LC.M  
 Last changed : 12/31/2022 3:33:27 AM  
 (modified after loading)  
 Analysis Method : C:\CHEM32\1\METHODS\DEF\_LC.M  
 Last changed : 12/31/2022 4:31:43 AM  
 (modified after loading)  
 Sample Info : IA, Hexane/i-PrOH = 99/1, 1.0 mL/min, 30 oC, 254 nm

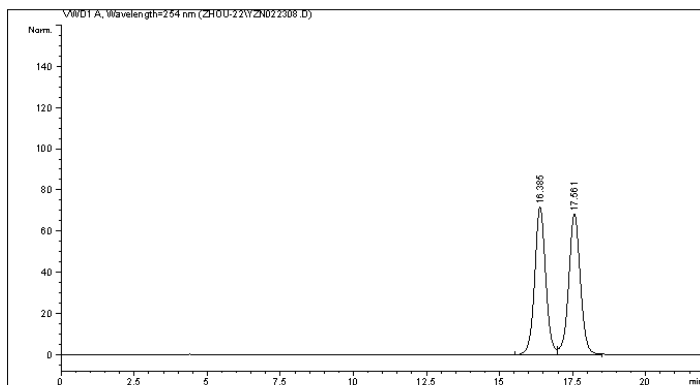

=====  
 Area Percent Report  
 =====

Sorted By : Signal  
 Multiplier: : 1.0000  
 Dilution: : 1.0000  
 Use Multiplier & Dilution Factor with ISTDs

Signal 1: WVD1 A, Wavelength=254 nm

| Peak # | RetTime [min] | Type | Width [min] | Area [mAU] | Height [mAU] | Area %  |
|--------|---------------|------|-------------|------------|--------------|---------|
| 1      | 16.385        | BV   | 0.4003      | 1878.85657 | 71.71486     | 49.8908 |
| 2      | 17.561        | VB   | 0.4227      | 1867.08228 | 68.32843     | 50.1092 |

Totals : 3765.93884 140.04329

=====  
 \*\*\* End of Report \*\*\*

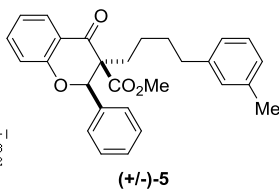

Data File C:\CHEM32\1\DATA\ZHOU-22\YZN022309.D  
 Sample Name: LL-11-63

=====  
 Acq. Operator :  
 Acq. Instrument : Instrument 1 Location : -  
 Injection Date : 12/31/2022 4:02:32 AM  
 Acq. Method : C:\CHEM32\1\METHODS\DEF\_LC.M  
 Last changed : 12/31/2022 4:01:40 AM  
 (modified after loading)  
 Analysis Method : C:\CHEM32\1\METHODS\DEF\_LC.M  
 Last changed : 12/31/2022 4:31:43 AM  
 (modified after loading)  
 Sample Info : IA, Hexane/i-PrOH = 99/1, 1.0 mL/min, 30 oC, 254 nm

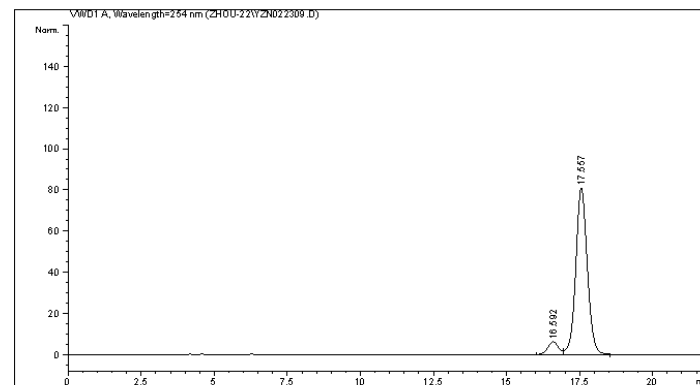

=====  
 Area Percent Report  
 =====

Sorted By : Signal  
 Multiplier: : 1.0000  
 Dilution: : 1.0000  
 Use Multiplier & Dilution Factor with ISTDs

Signal 1: WVD1 A, Wavelength=254 nm

| Peak # | RetTime [min] | Type | Width [min] | Area [mAU] | Height [mAU] | Area %  |
|--------|---------------|------|-------------|------------|--------------|---------|
| 1      | 16.592        | BV   | 0.3872      | 159.30807  | 6.22962      | 6.6852  |
| 2      | 17.557        | VB   | 0.4209      | 2223.68799 | 80.96862     | 93.3148 |

Totals : 2382.99606 87.19824

=====  
 \*\*\* End of Report \*\*\*

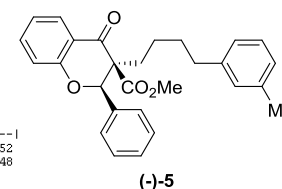

Supplement: d3ob01315d1.pdf [file d3ob01315d1.pdf]
